# Supplementary material
Source: PubMed Central journal article supplement (PMC3603002)

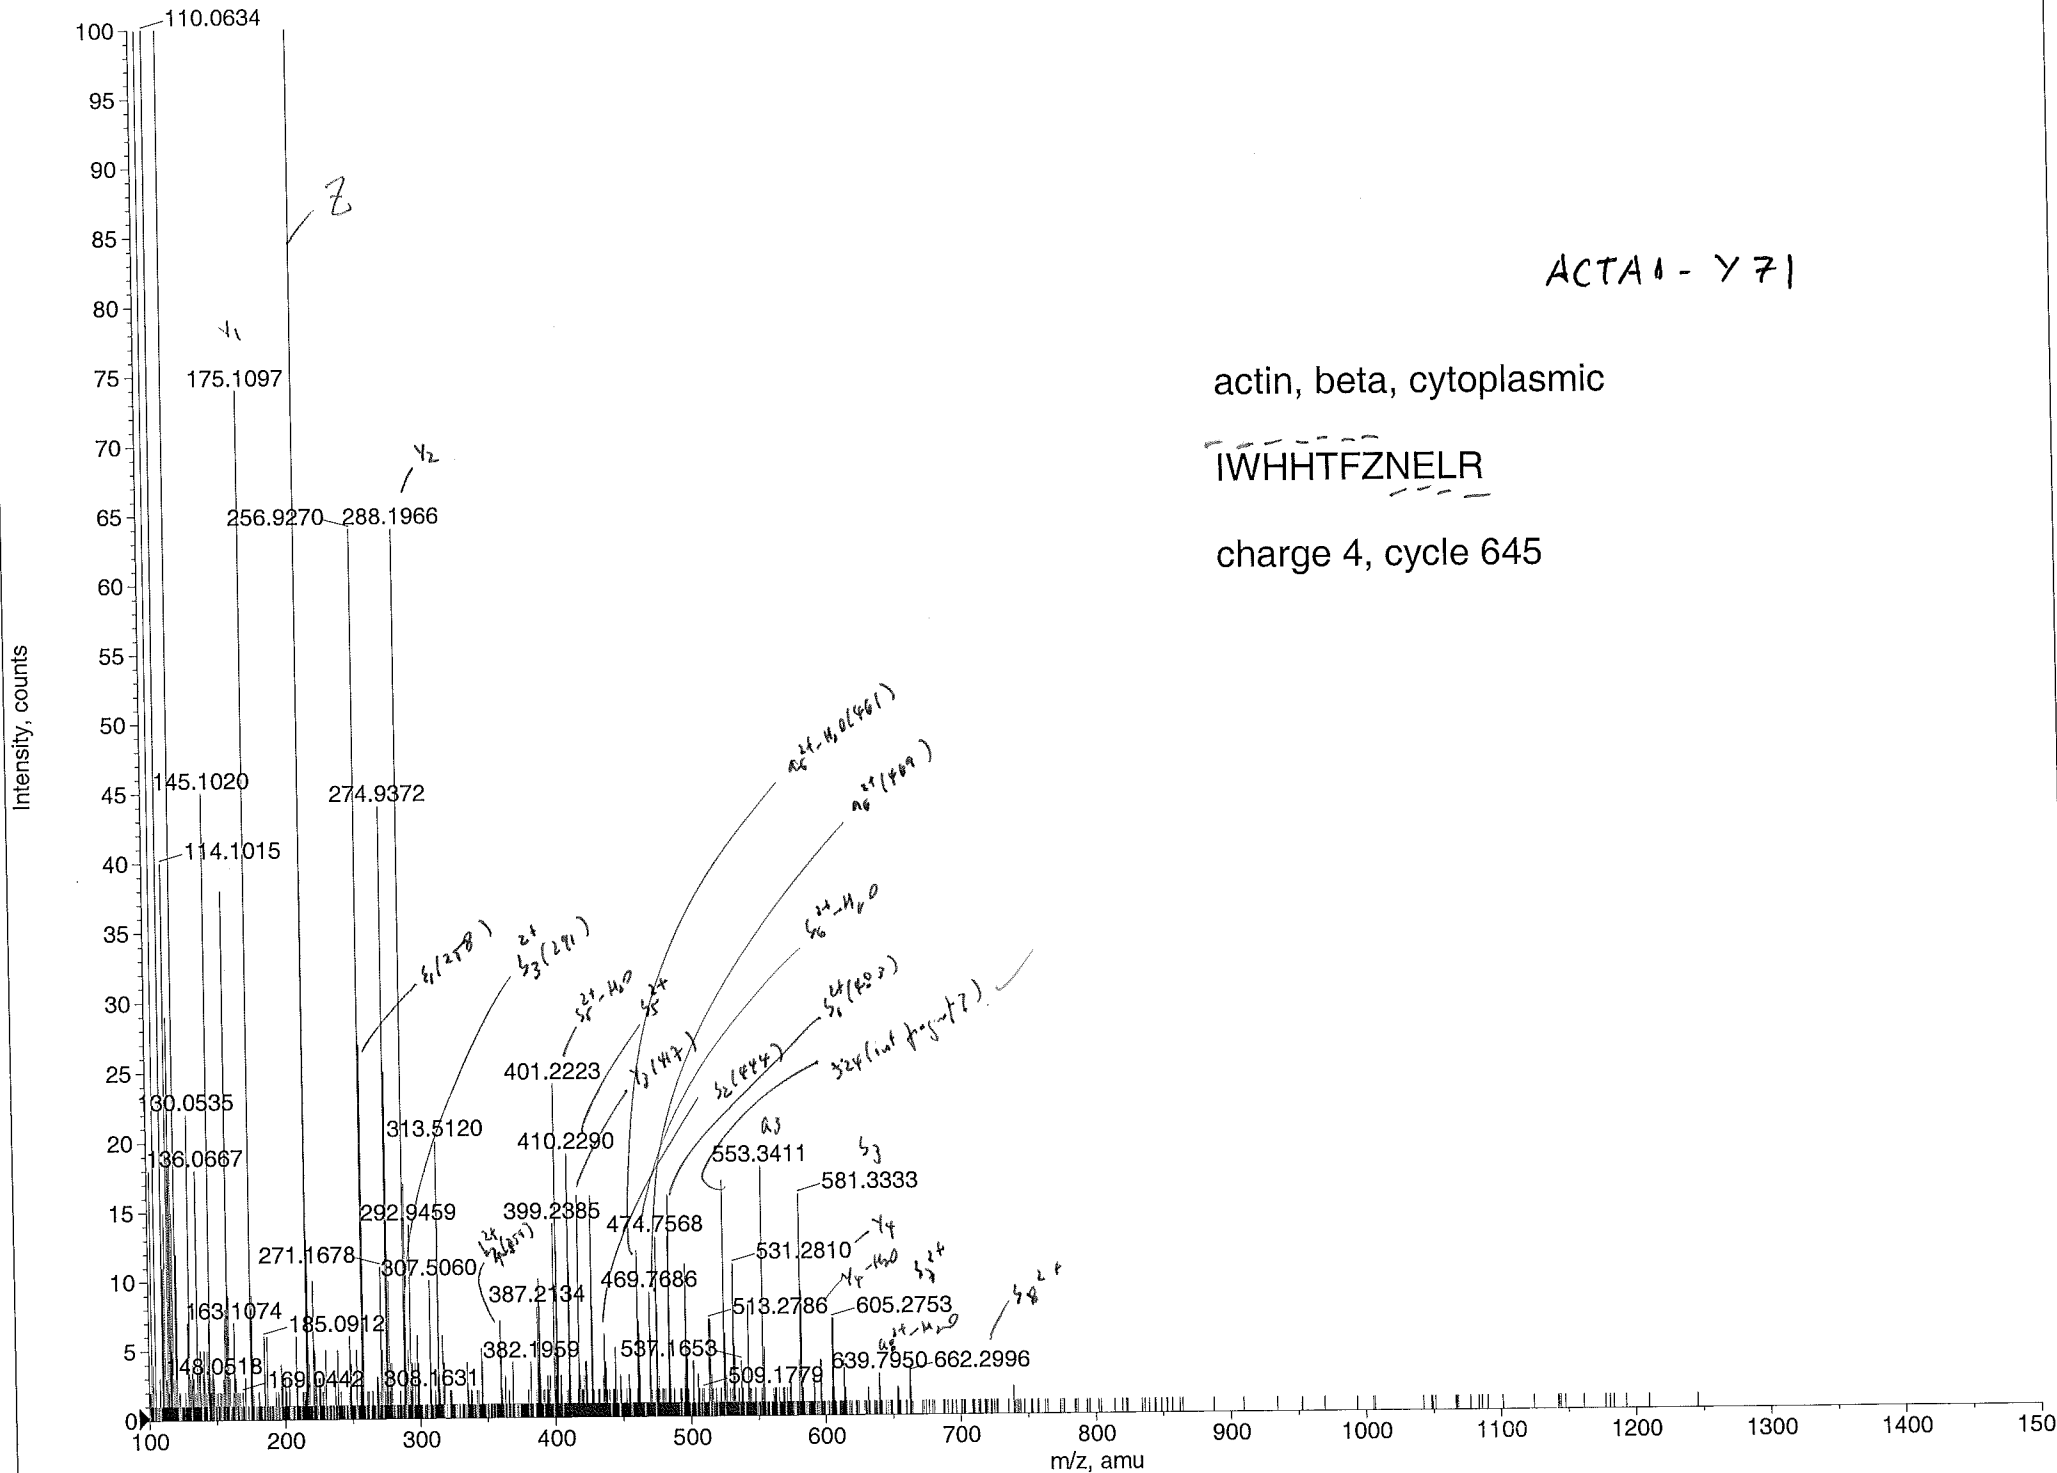

ACTA1 - Y71

actin, beta, cytoplasmic

IWHHTFZNELR

charge 4, cycle 645

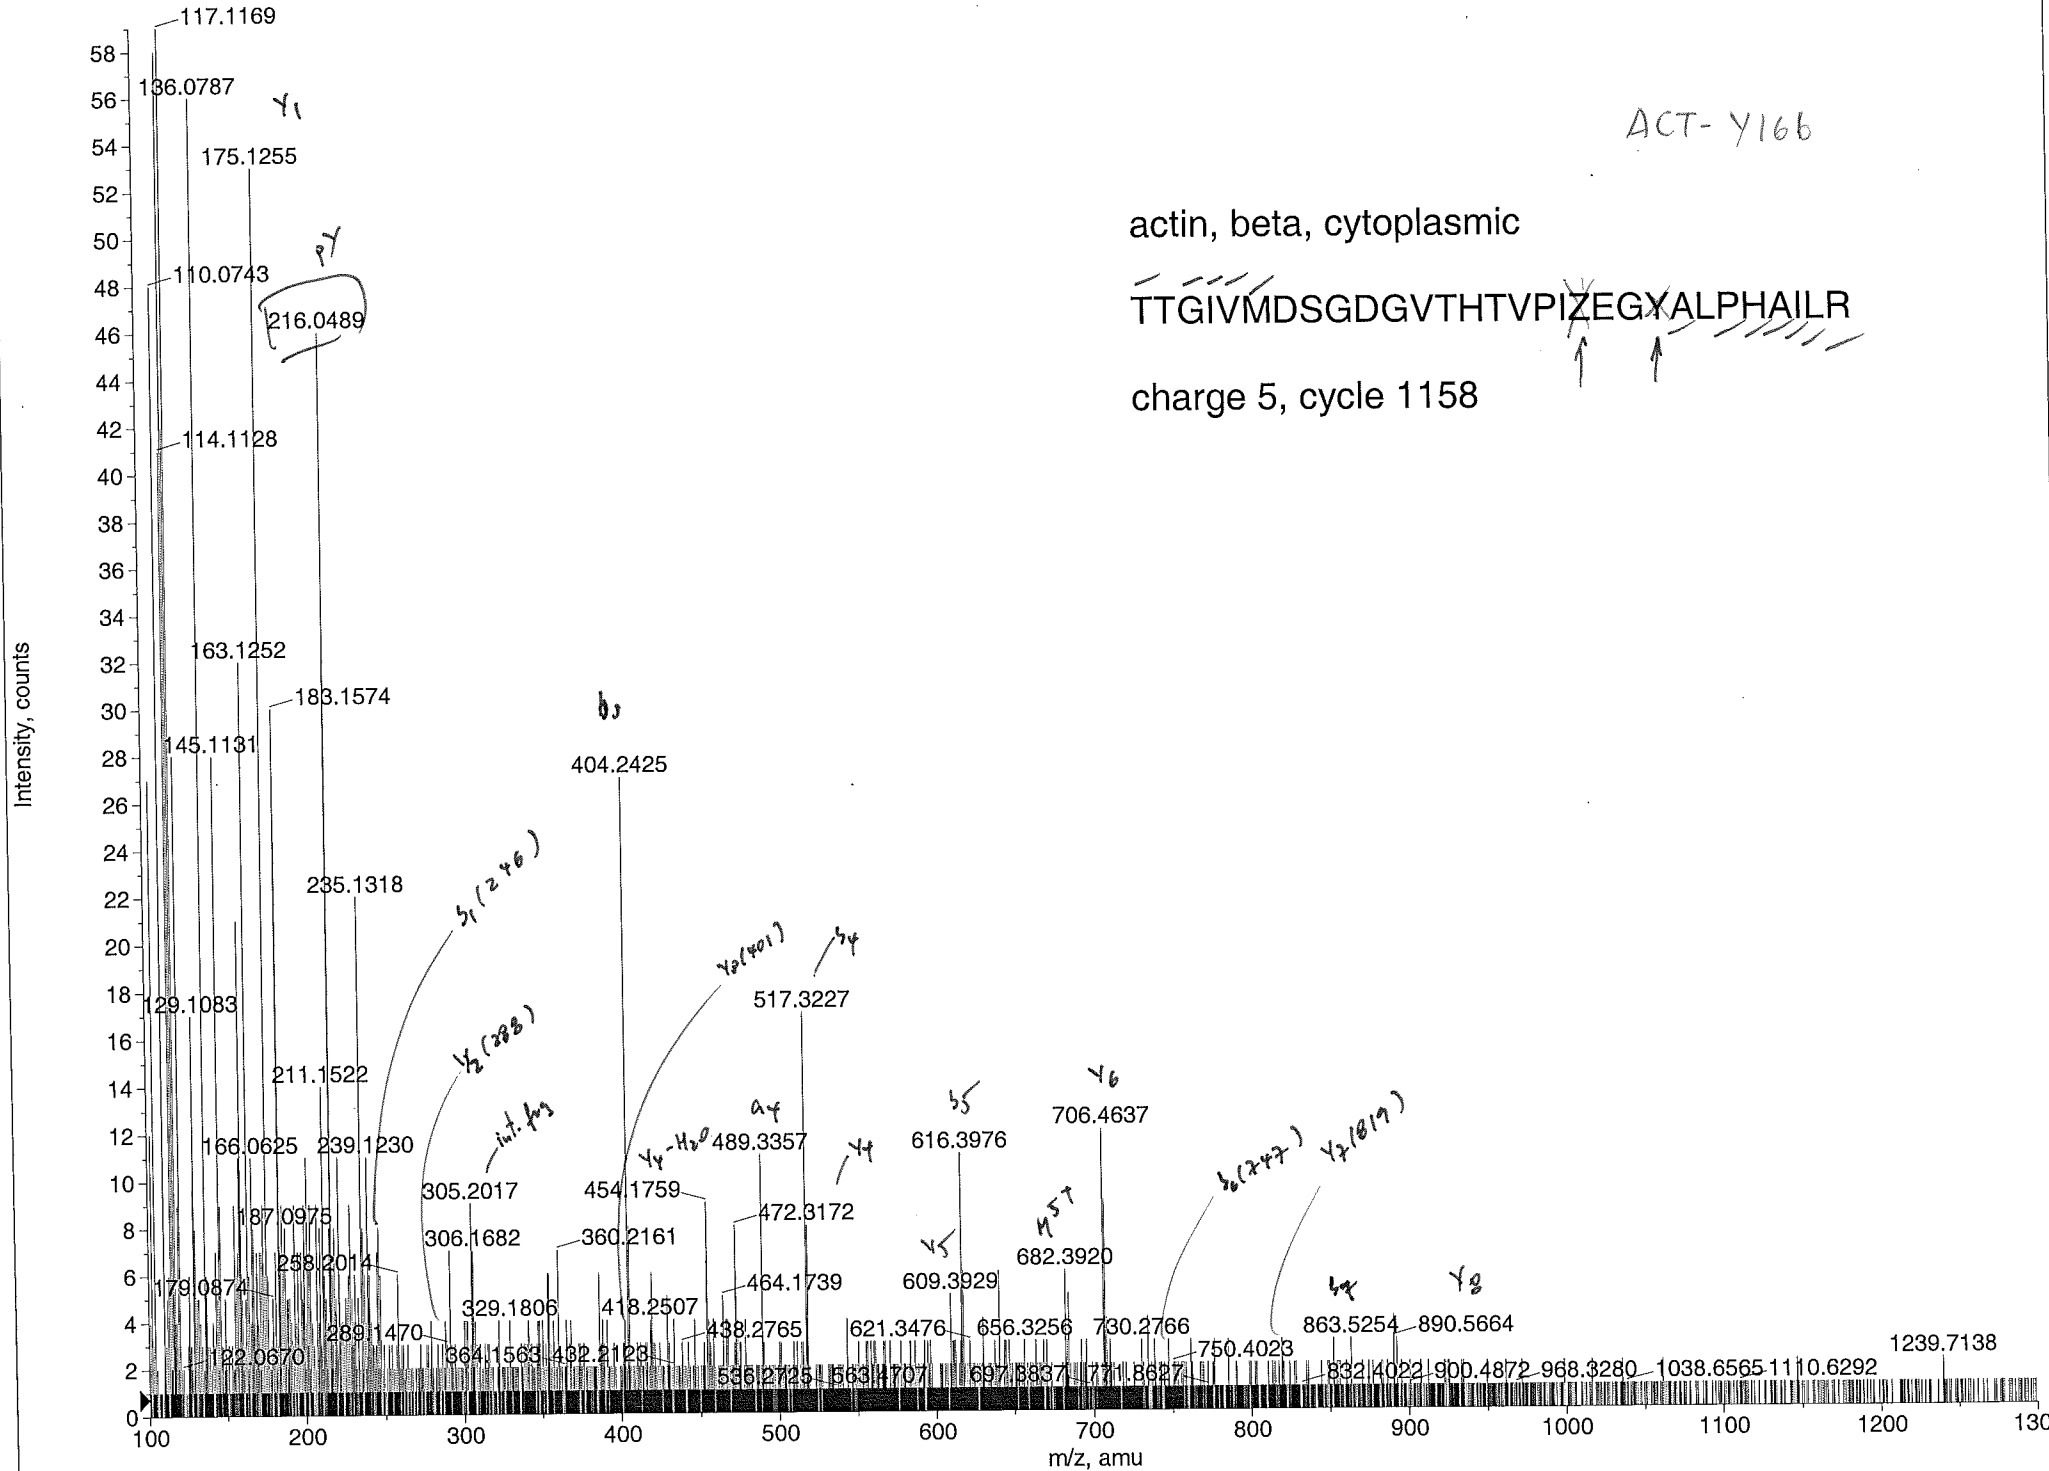

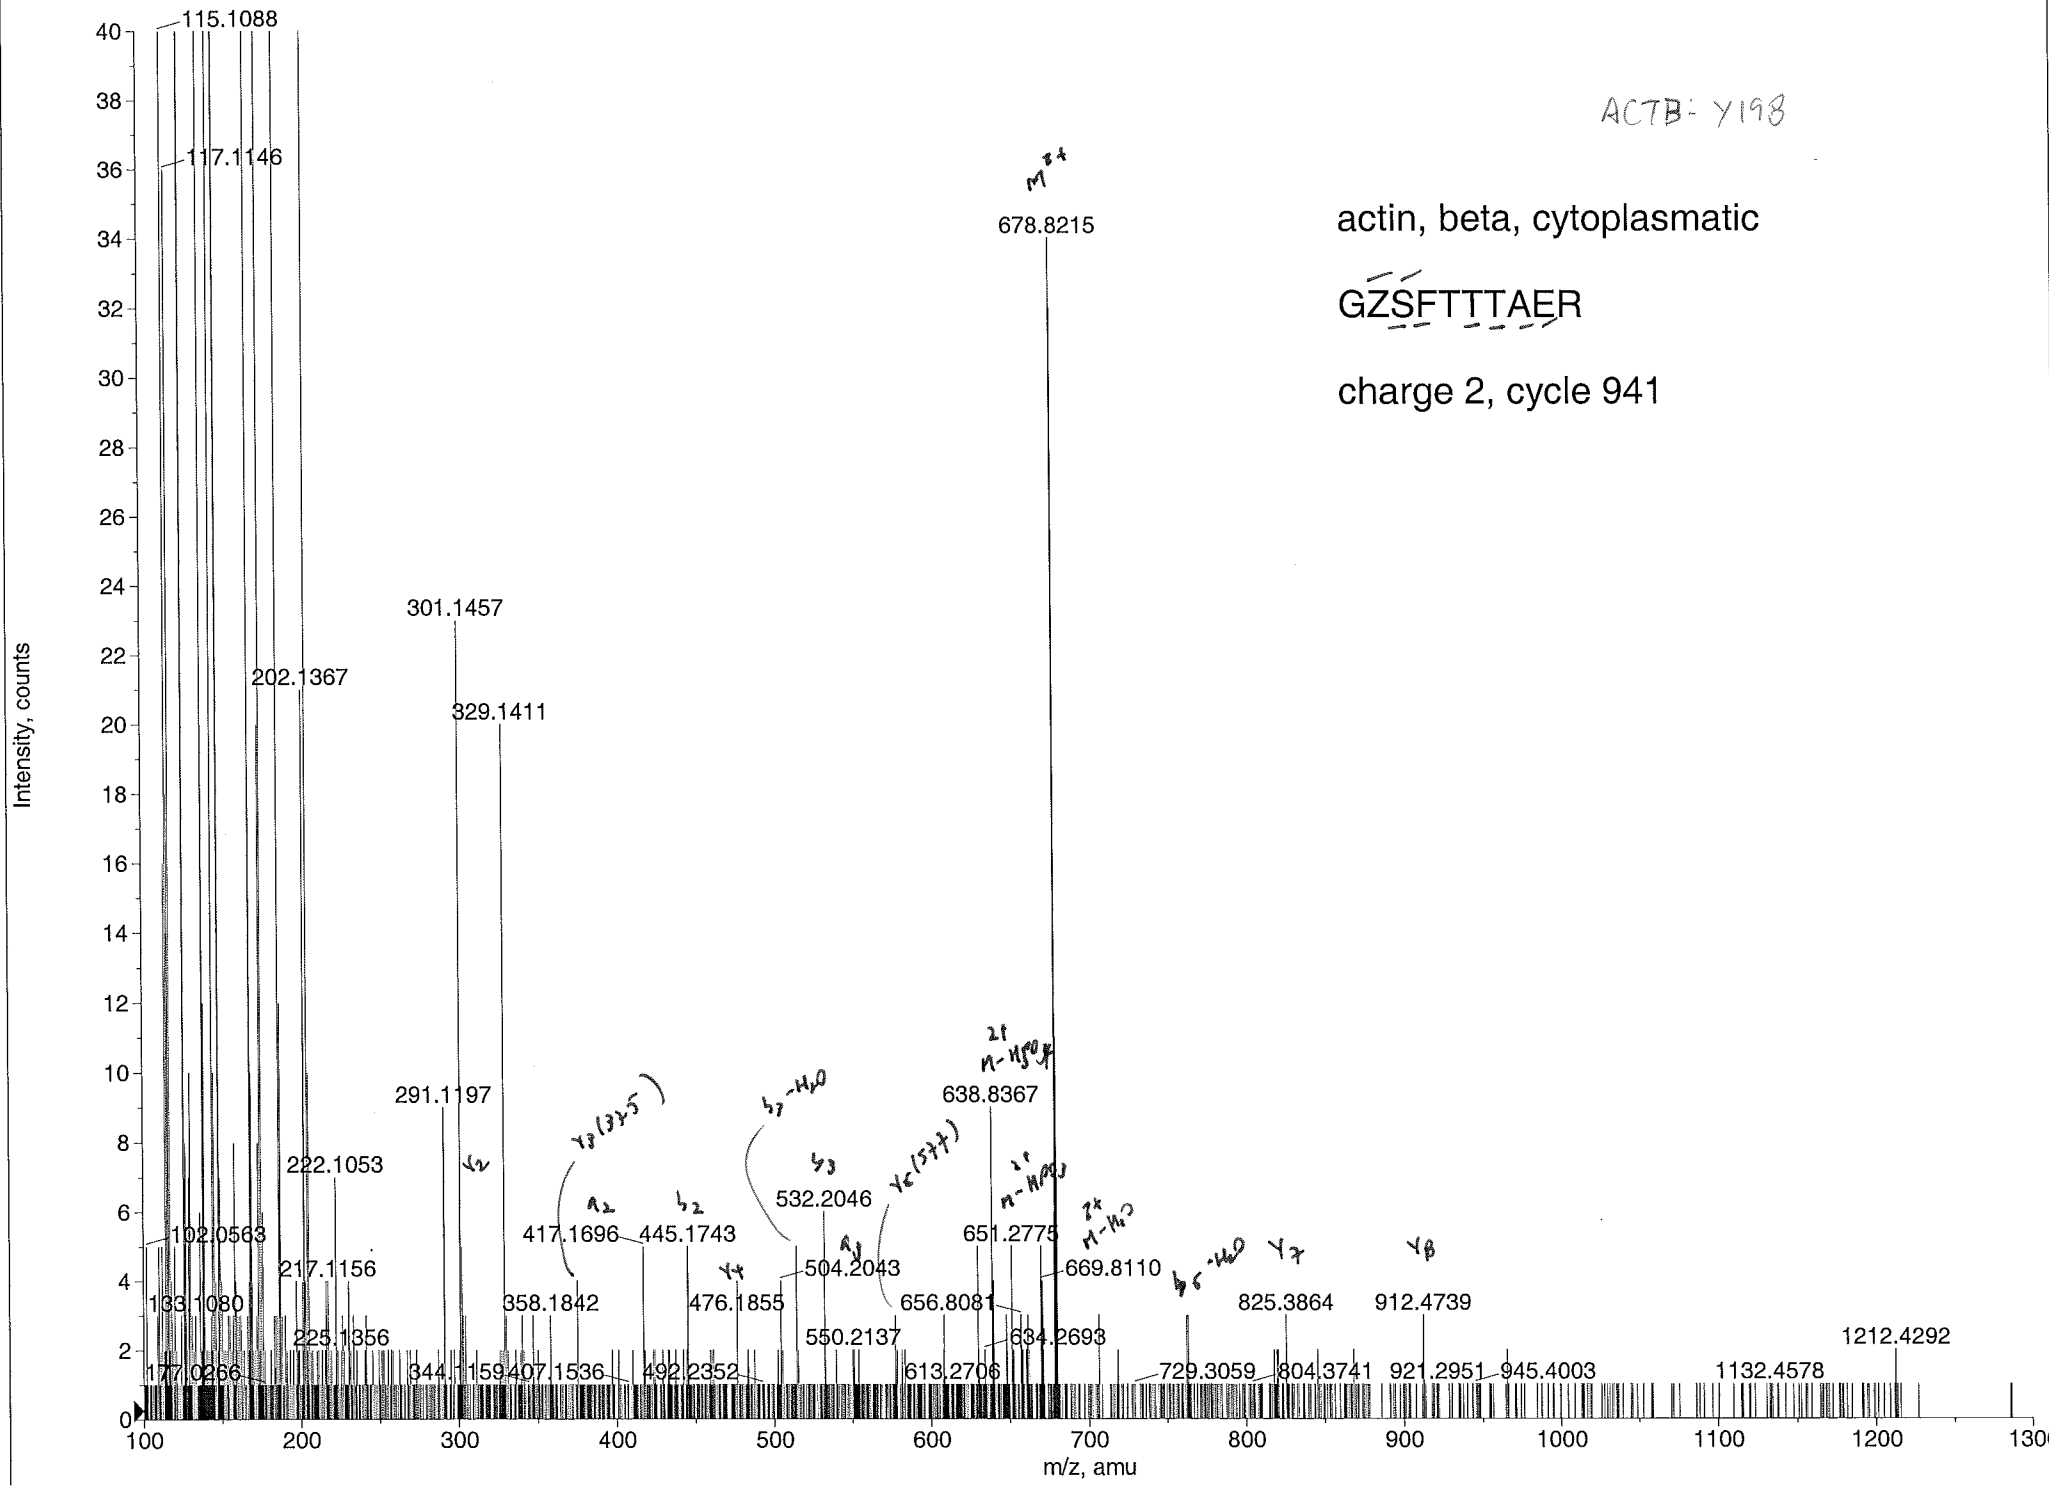

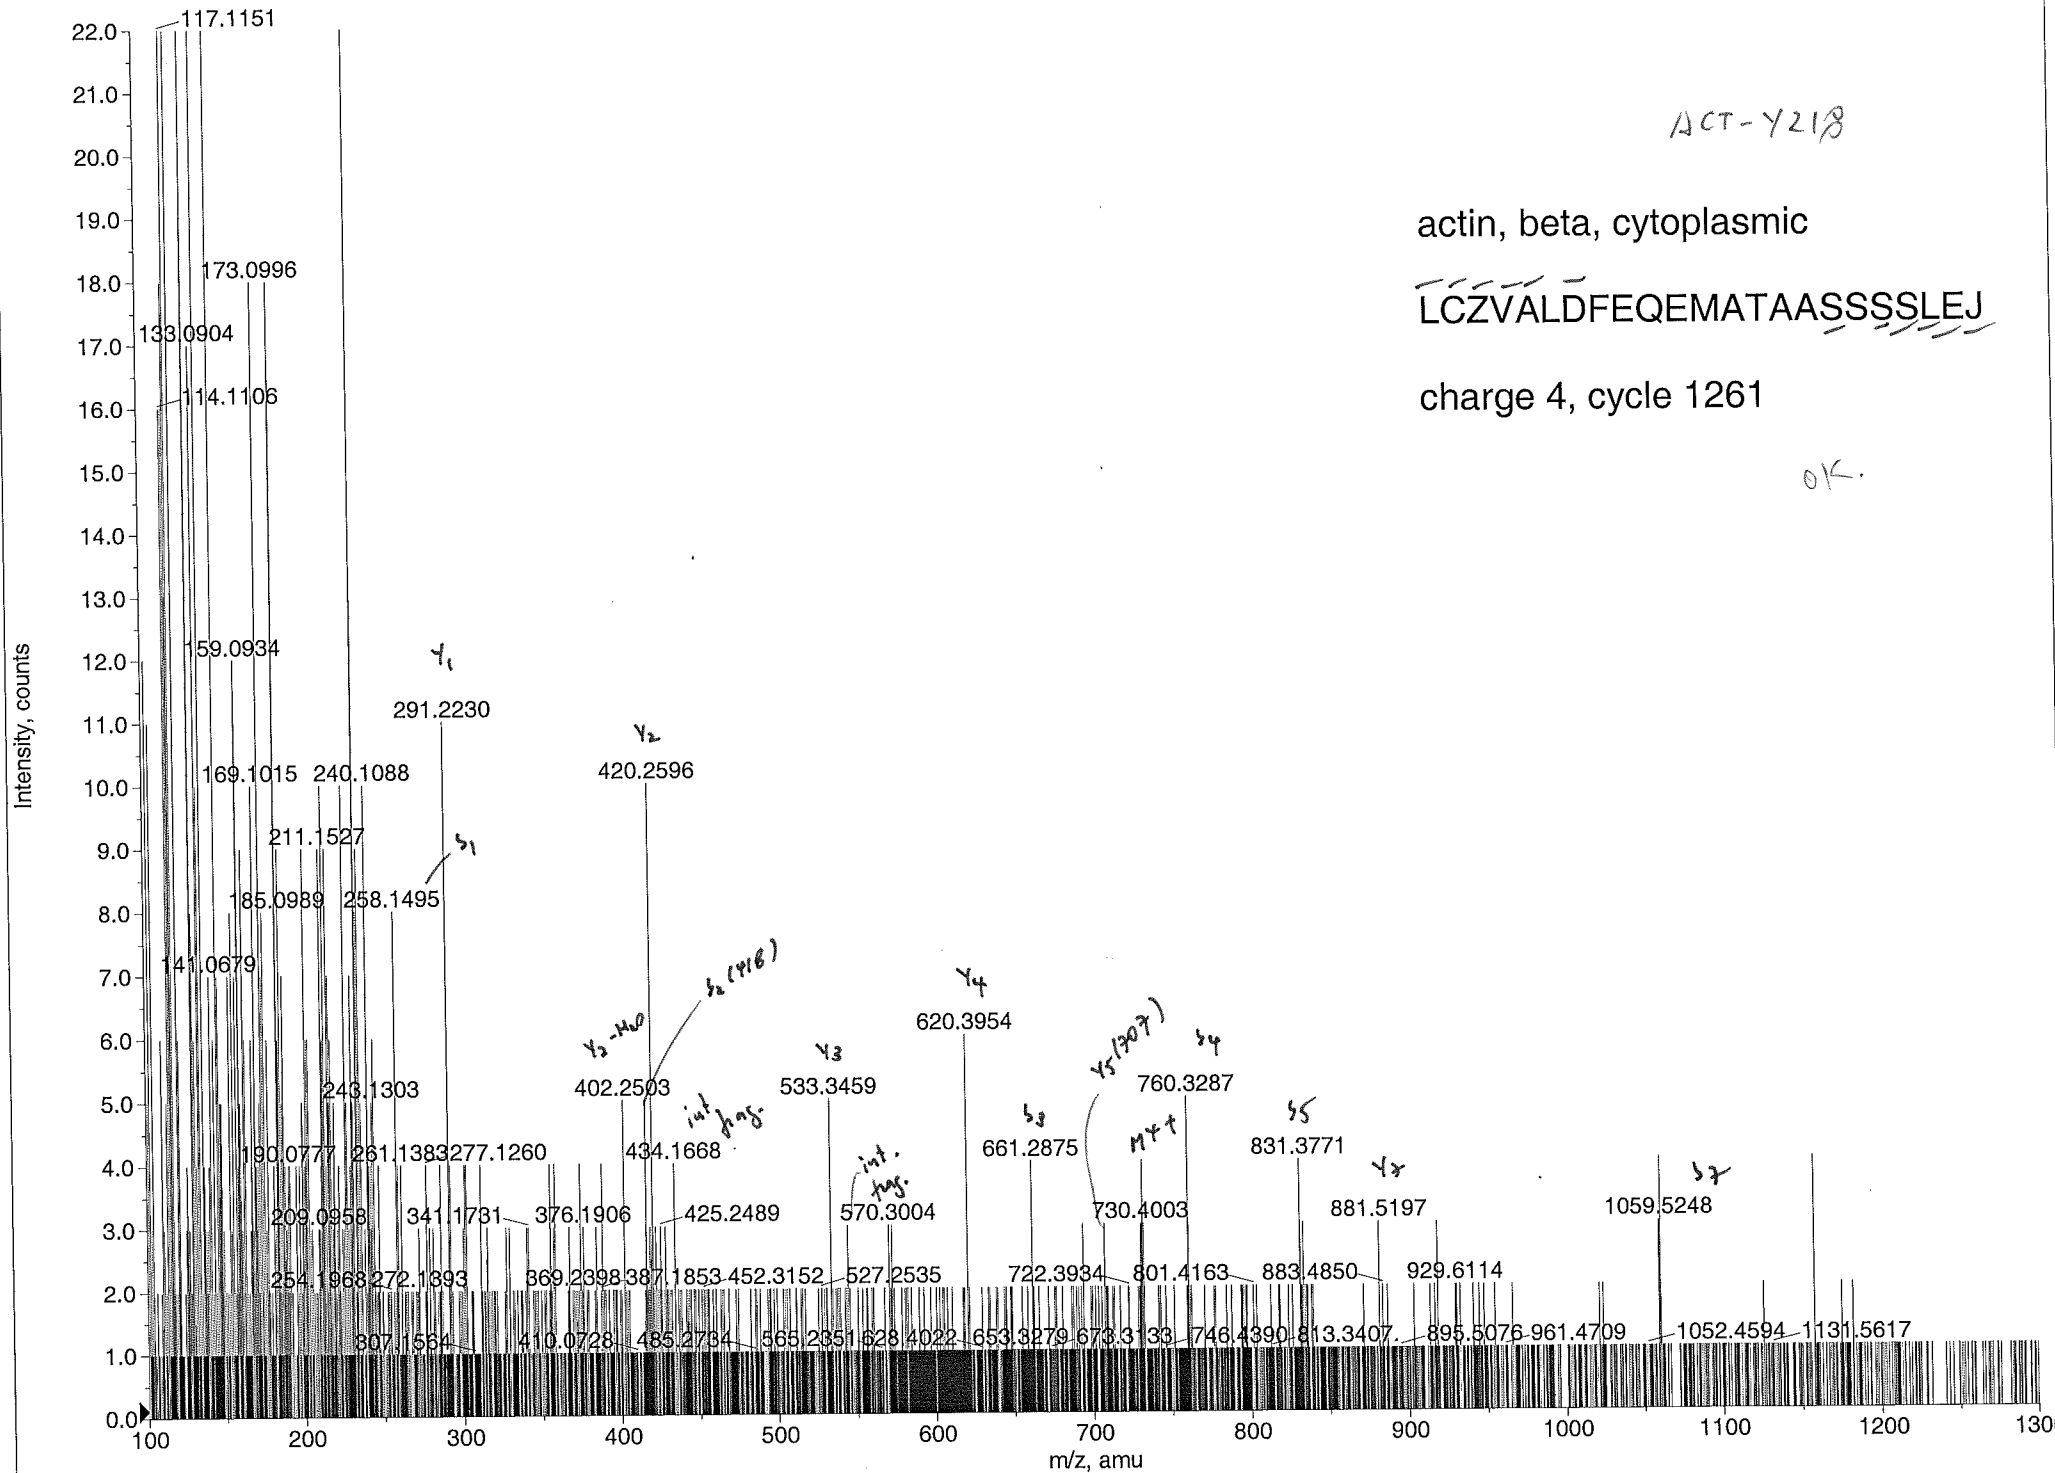

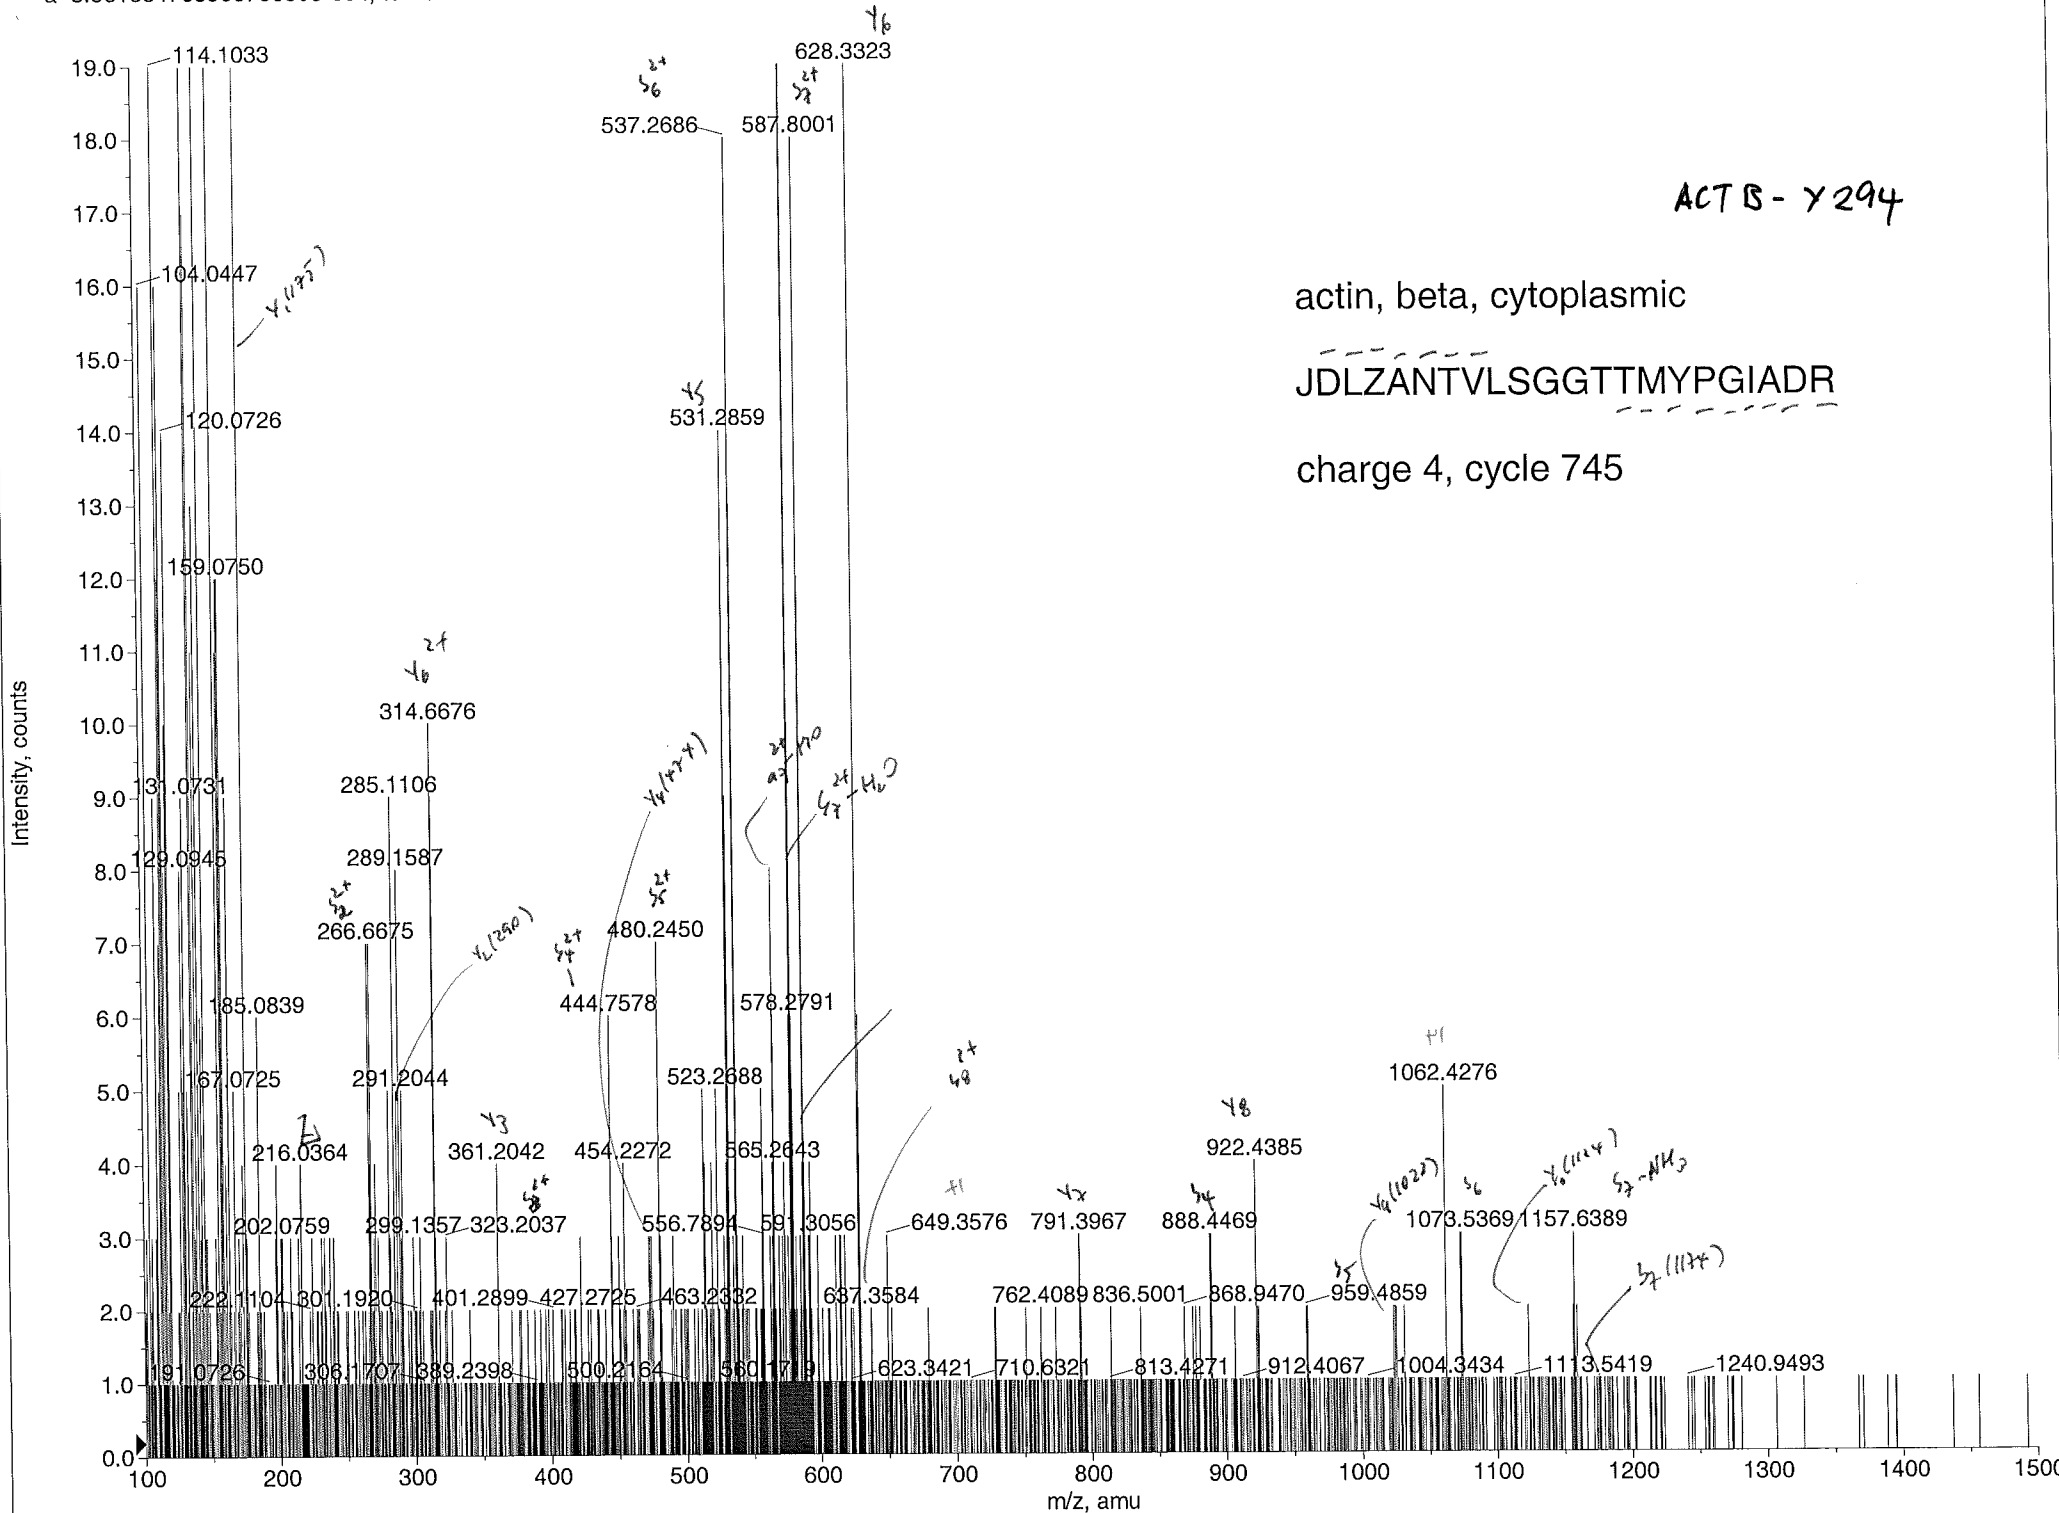

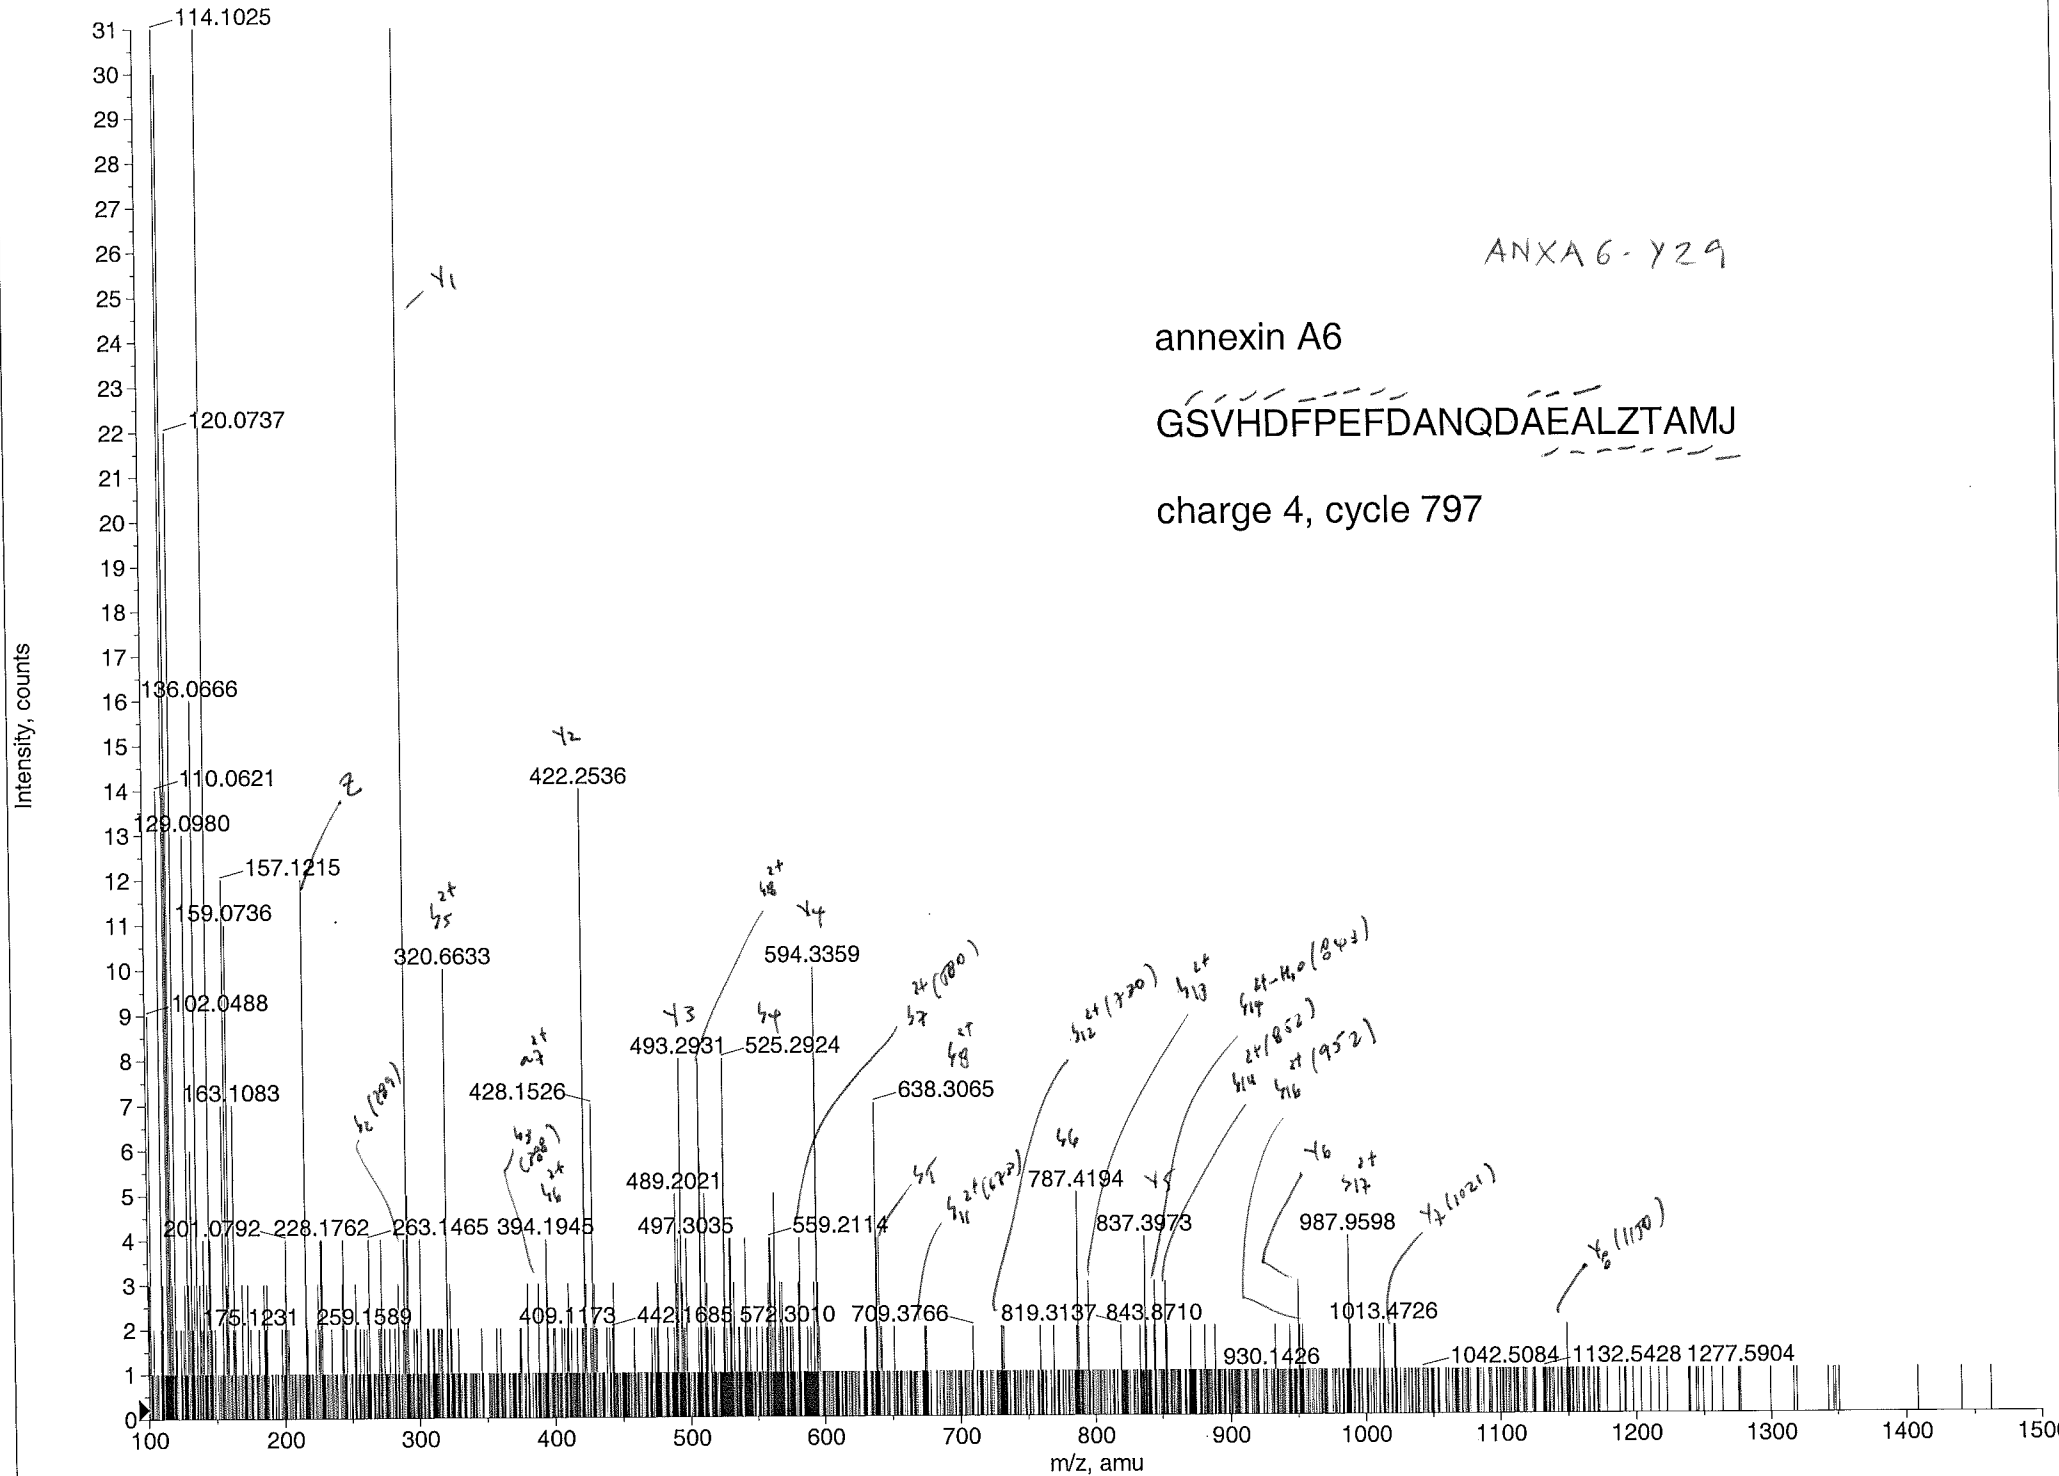

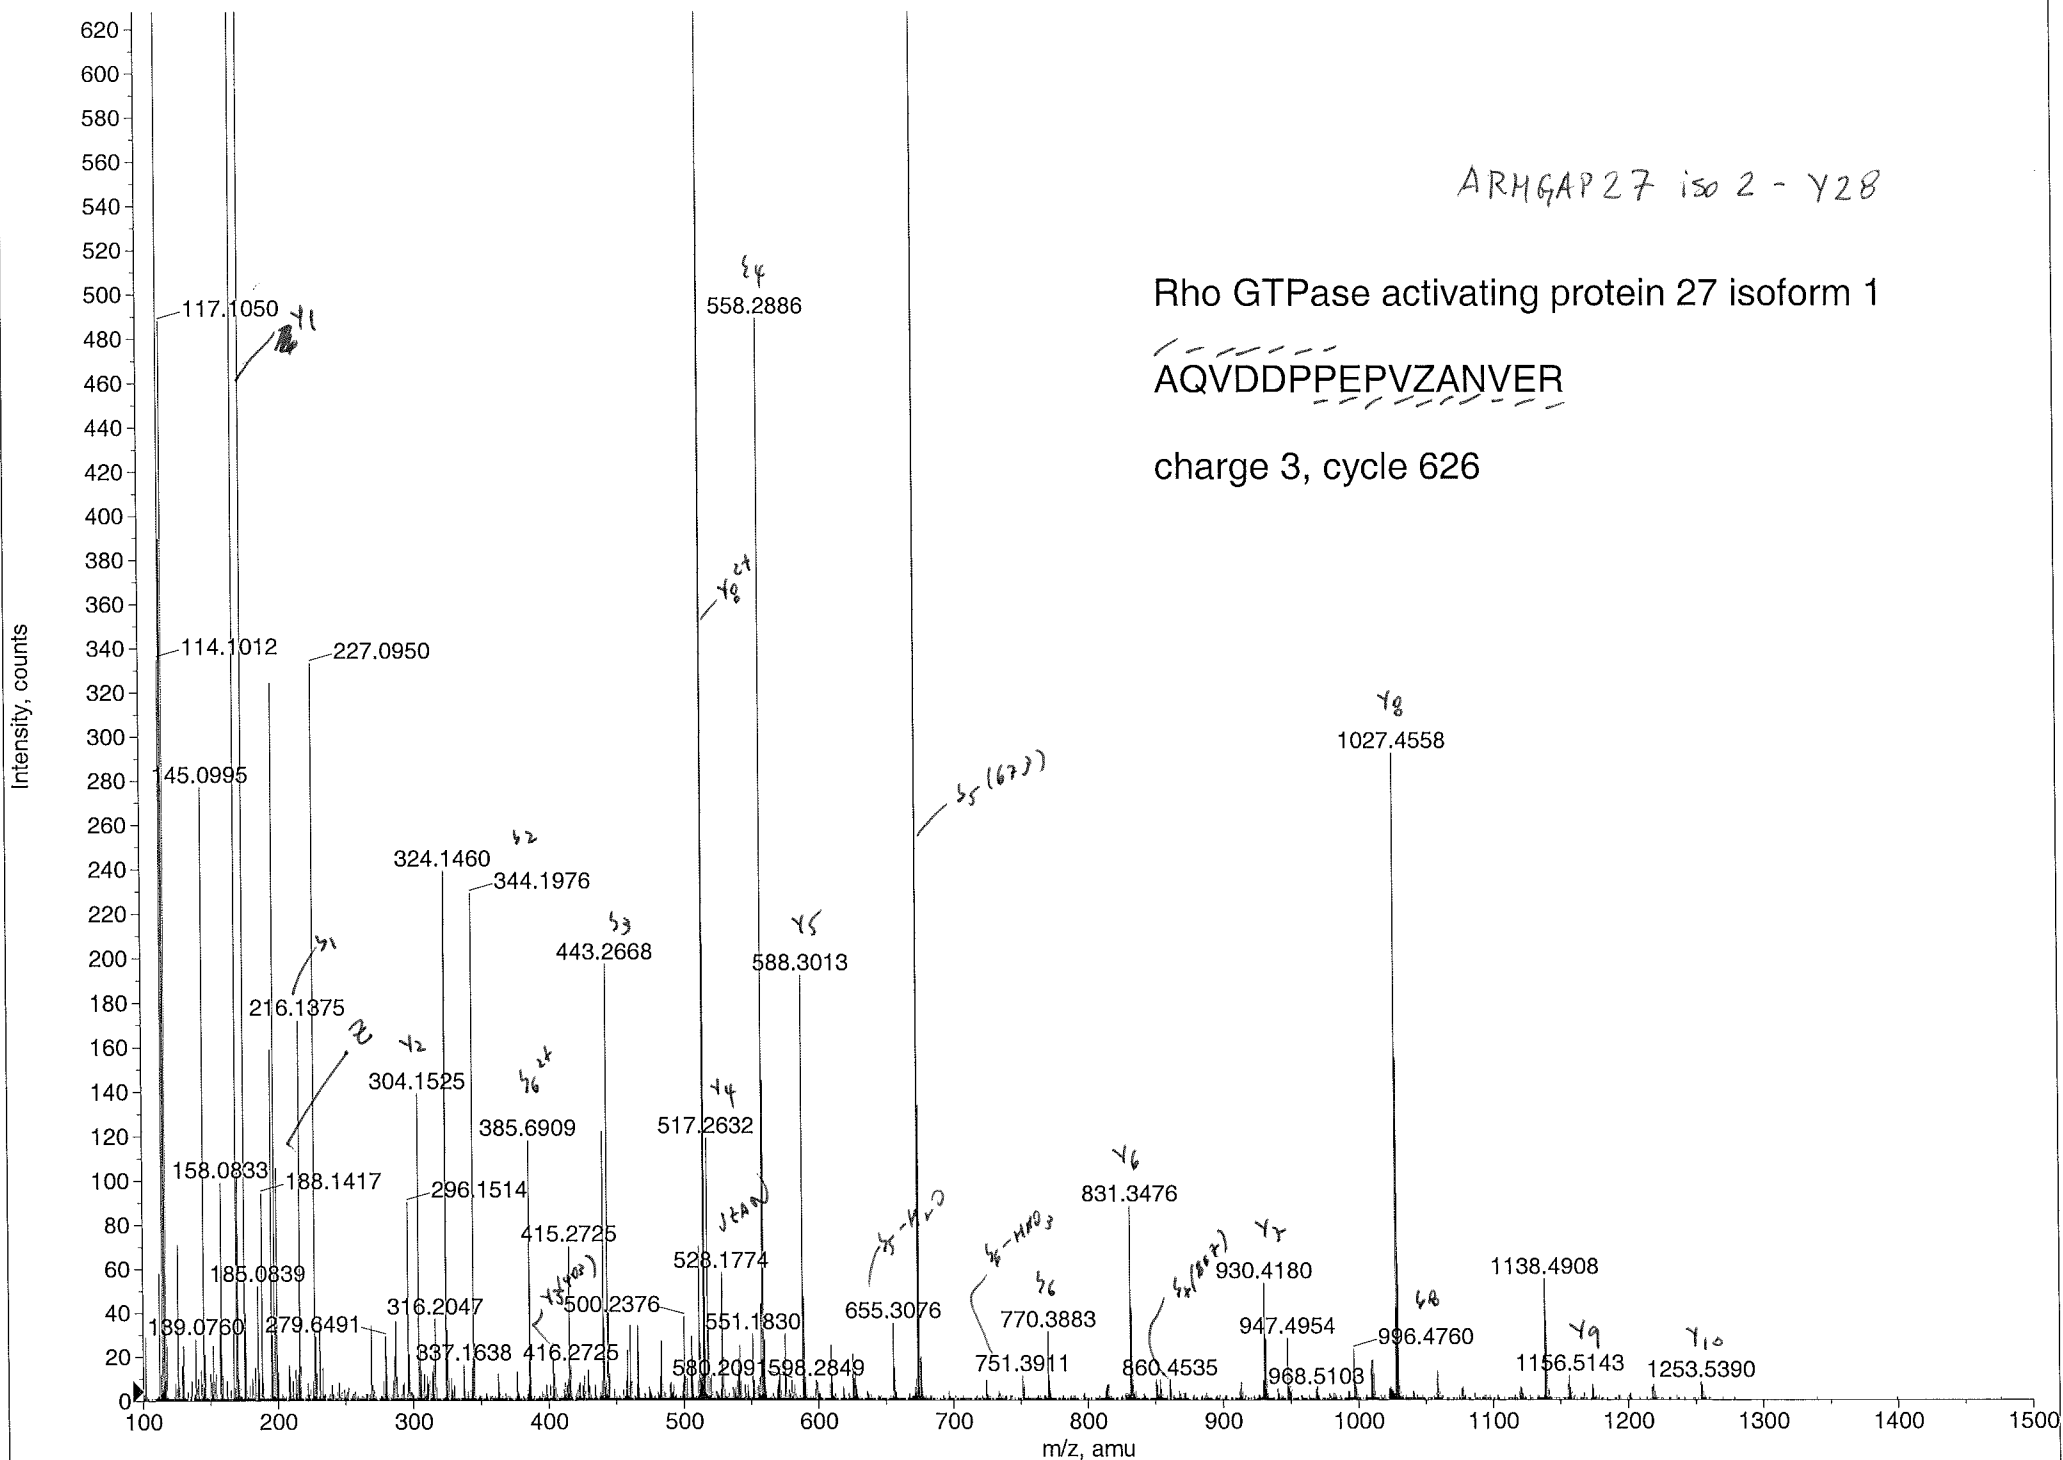

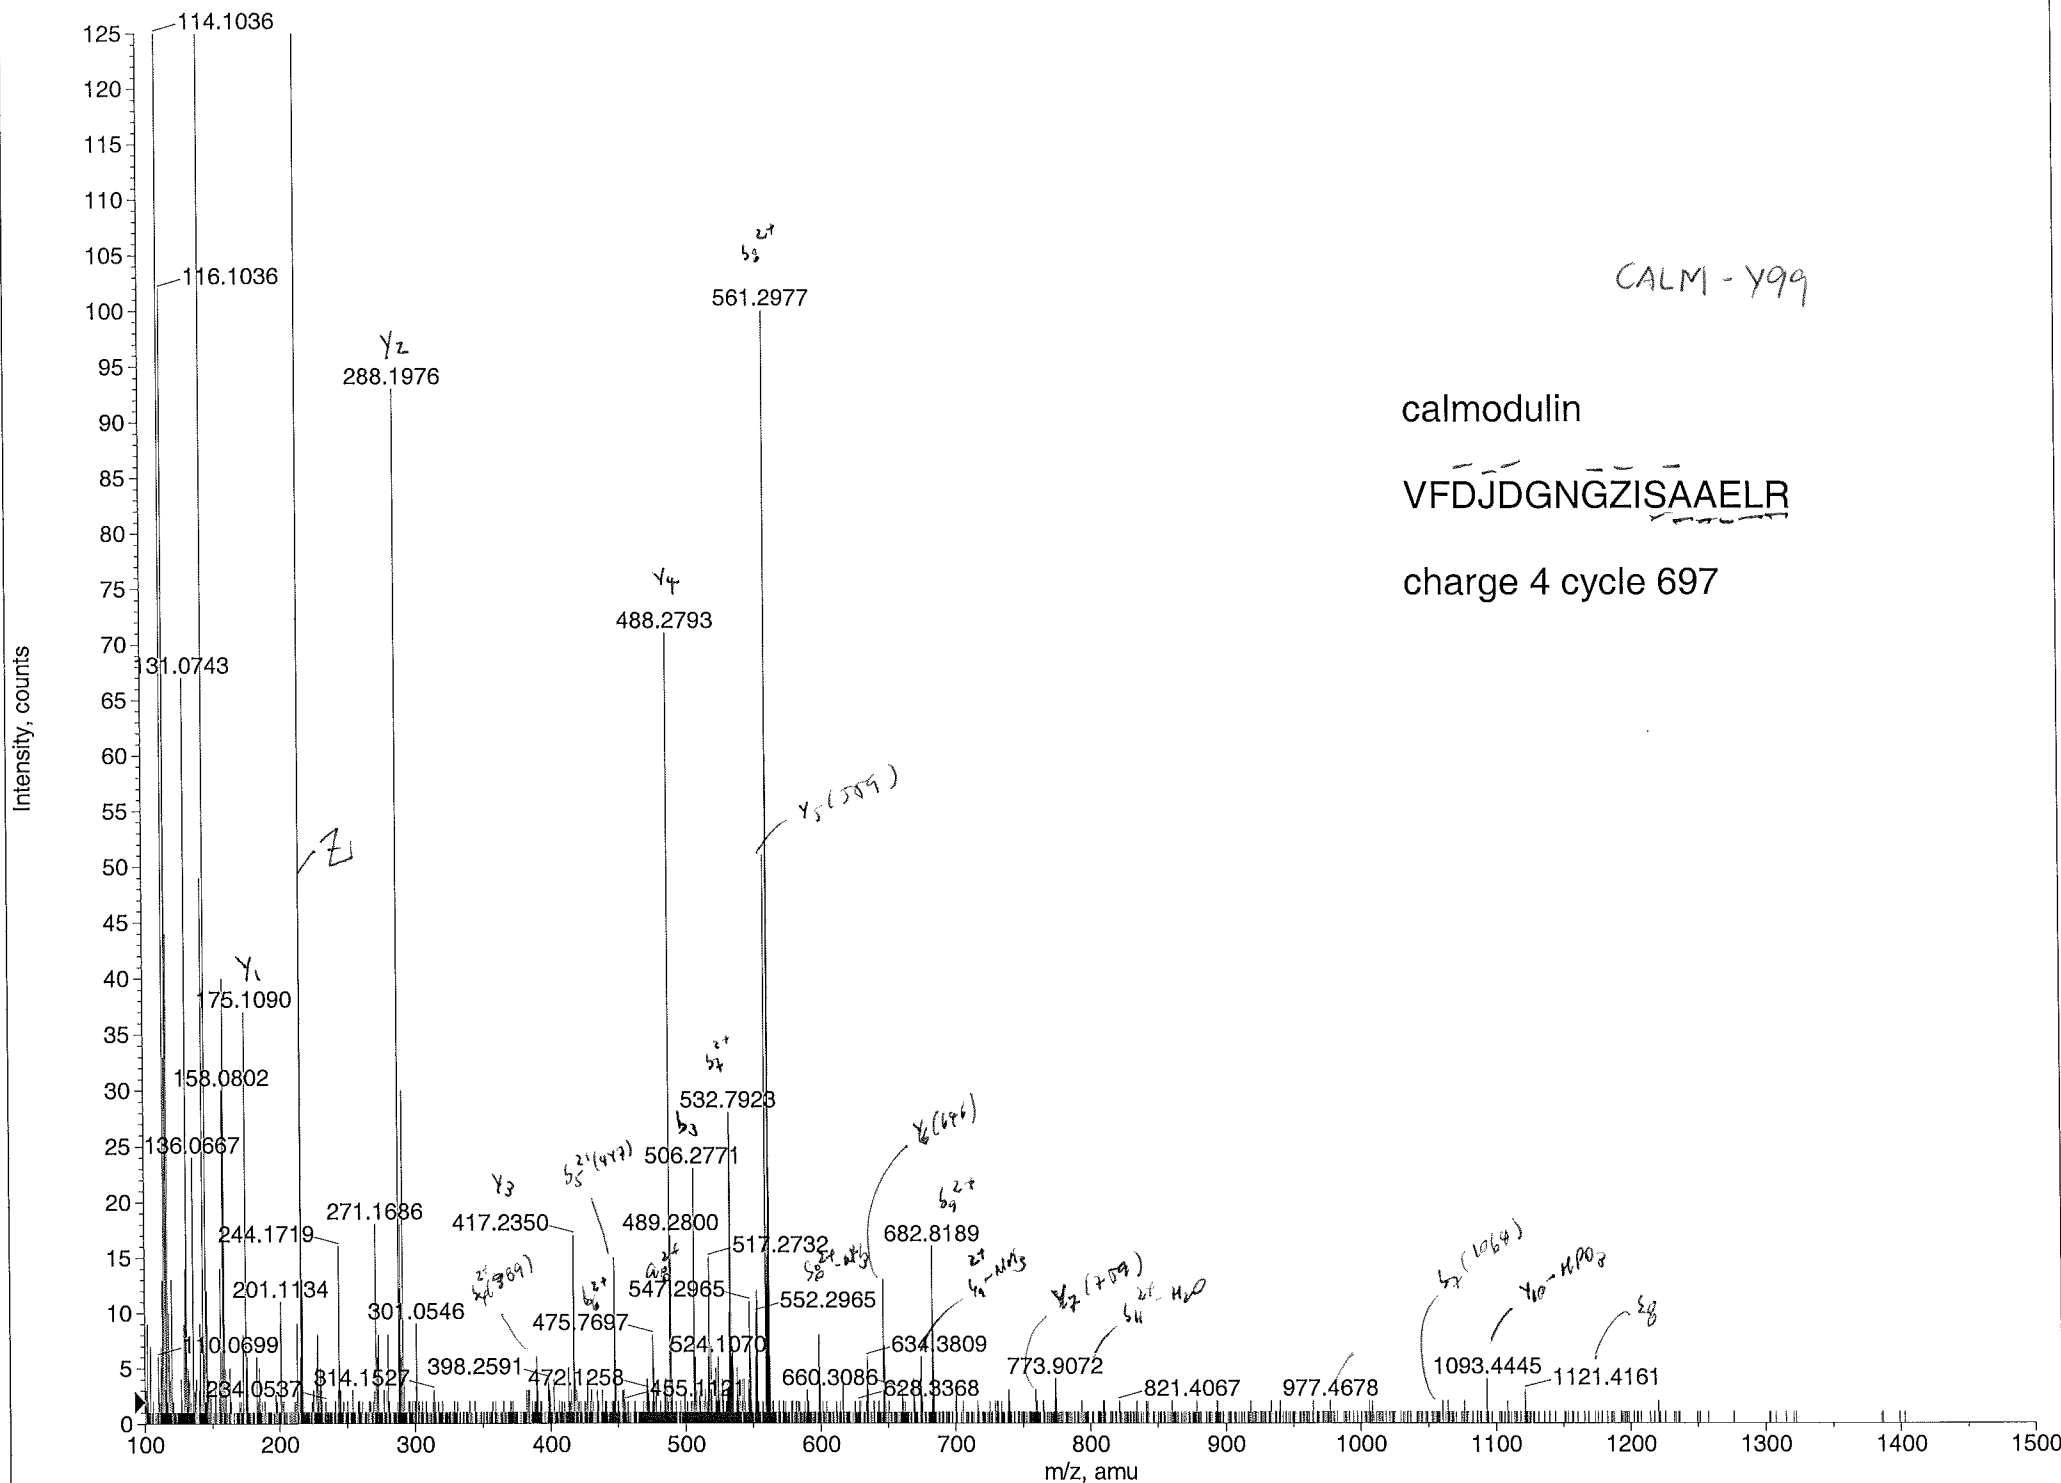



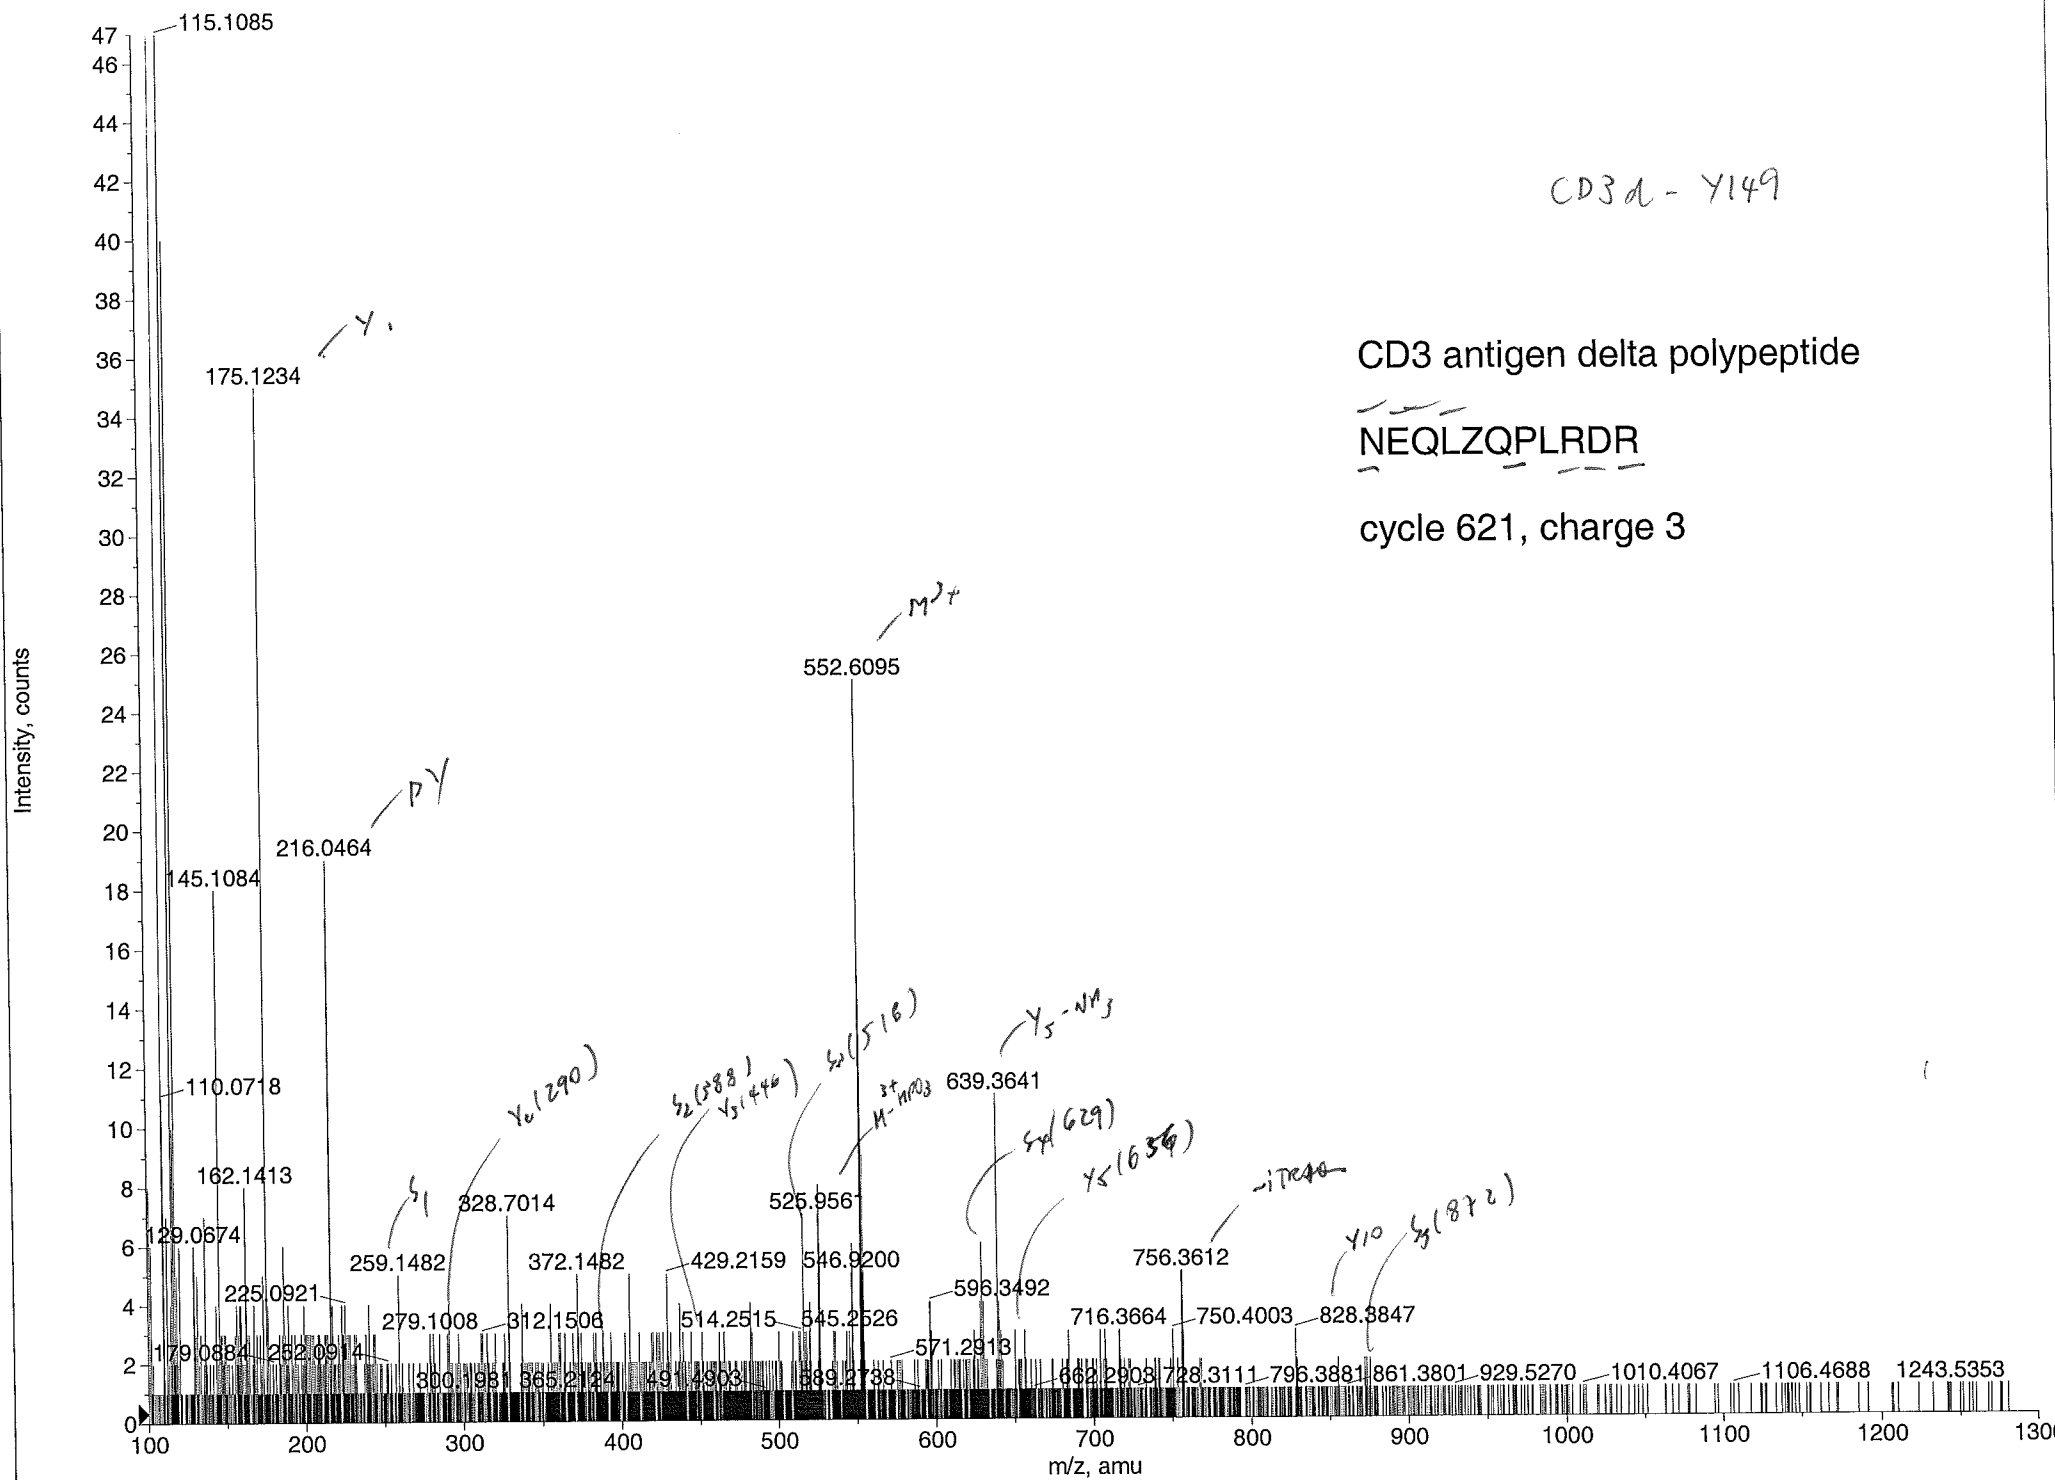

CD3A - Y149

CD3 antigen delta polypeptide

NEQLZQPLRDR

cycle 621, charge 3

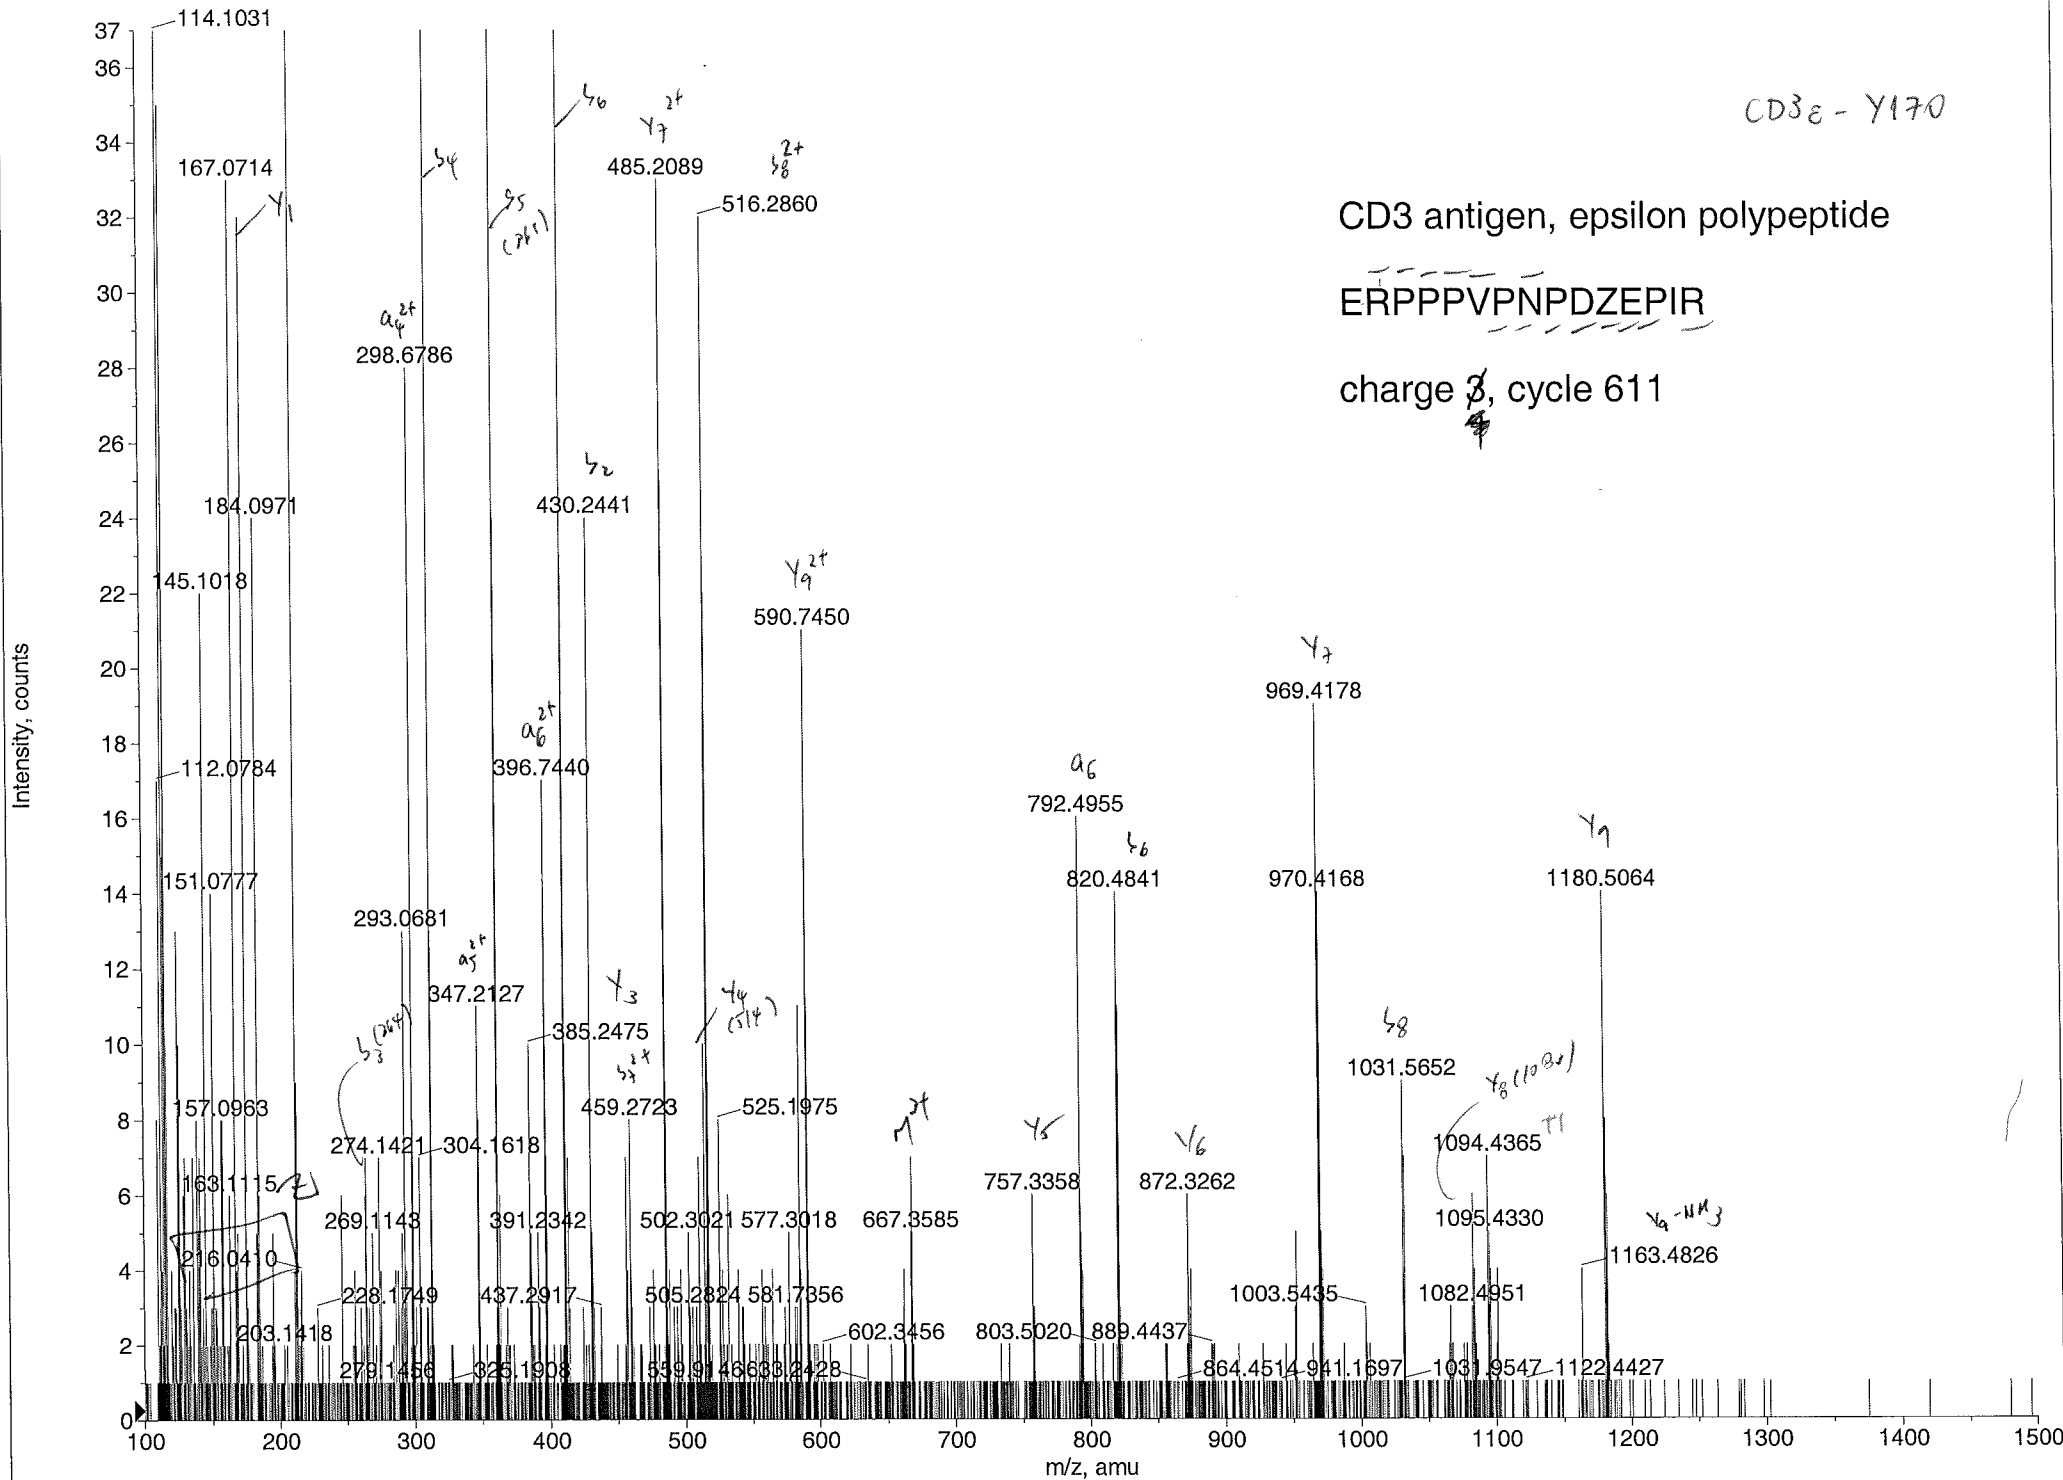

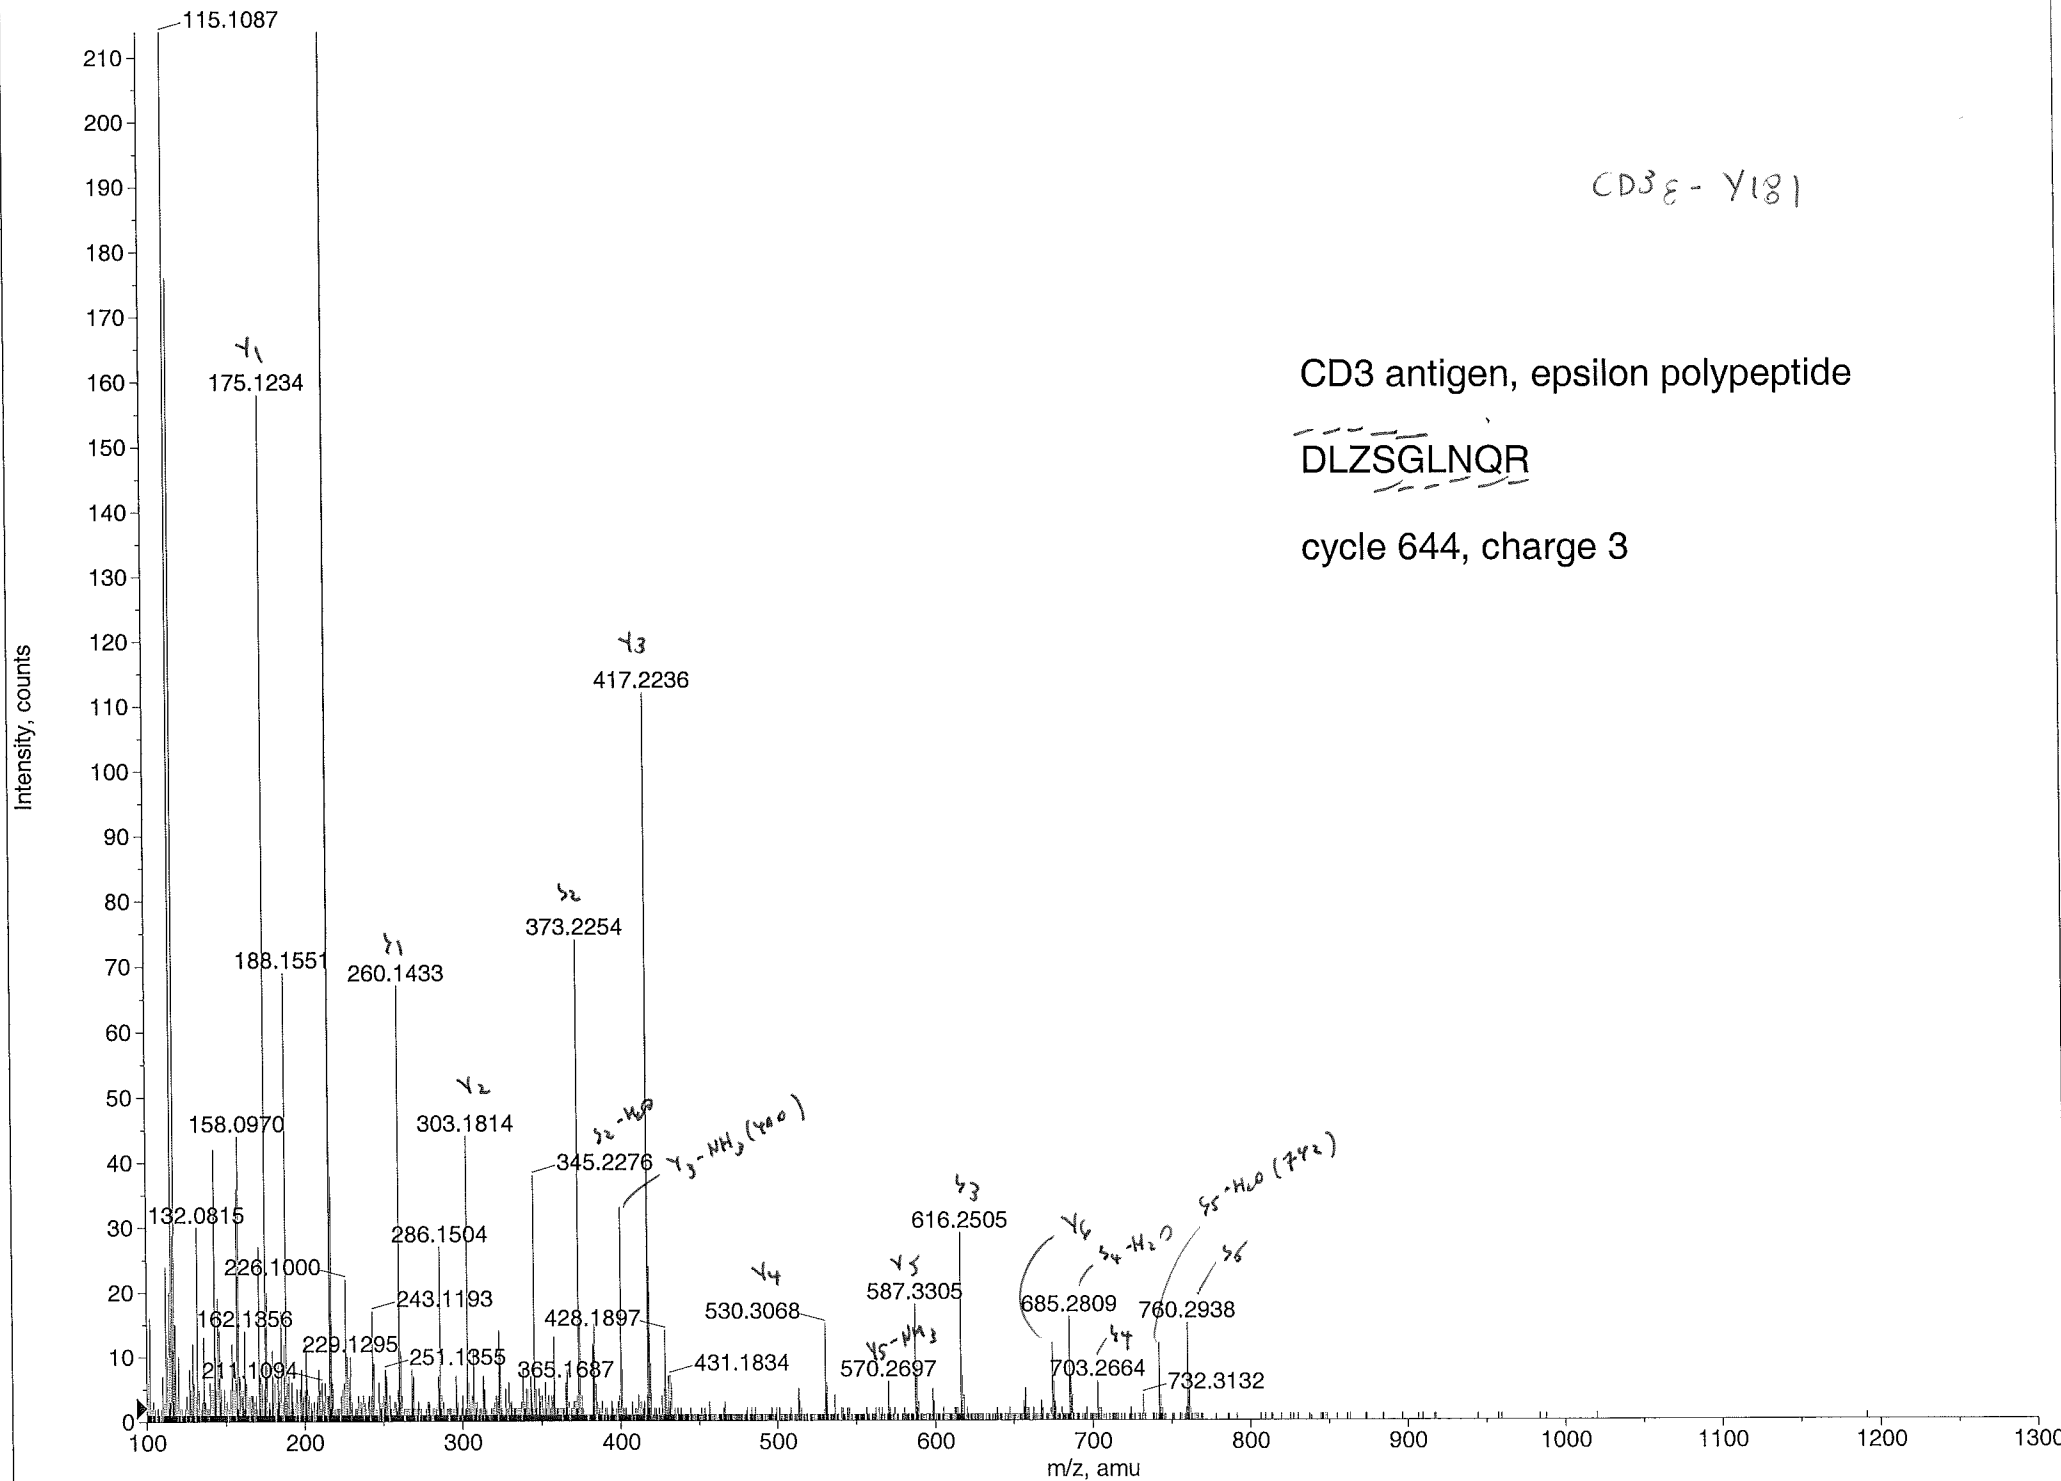

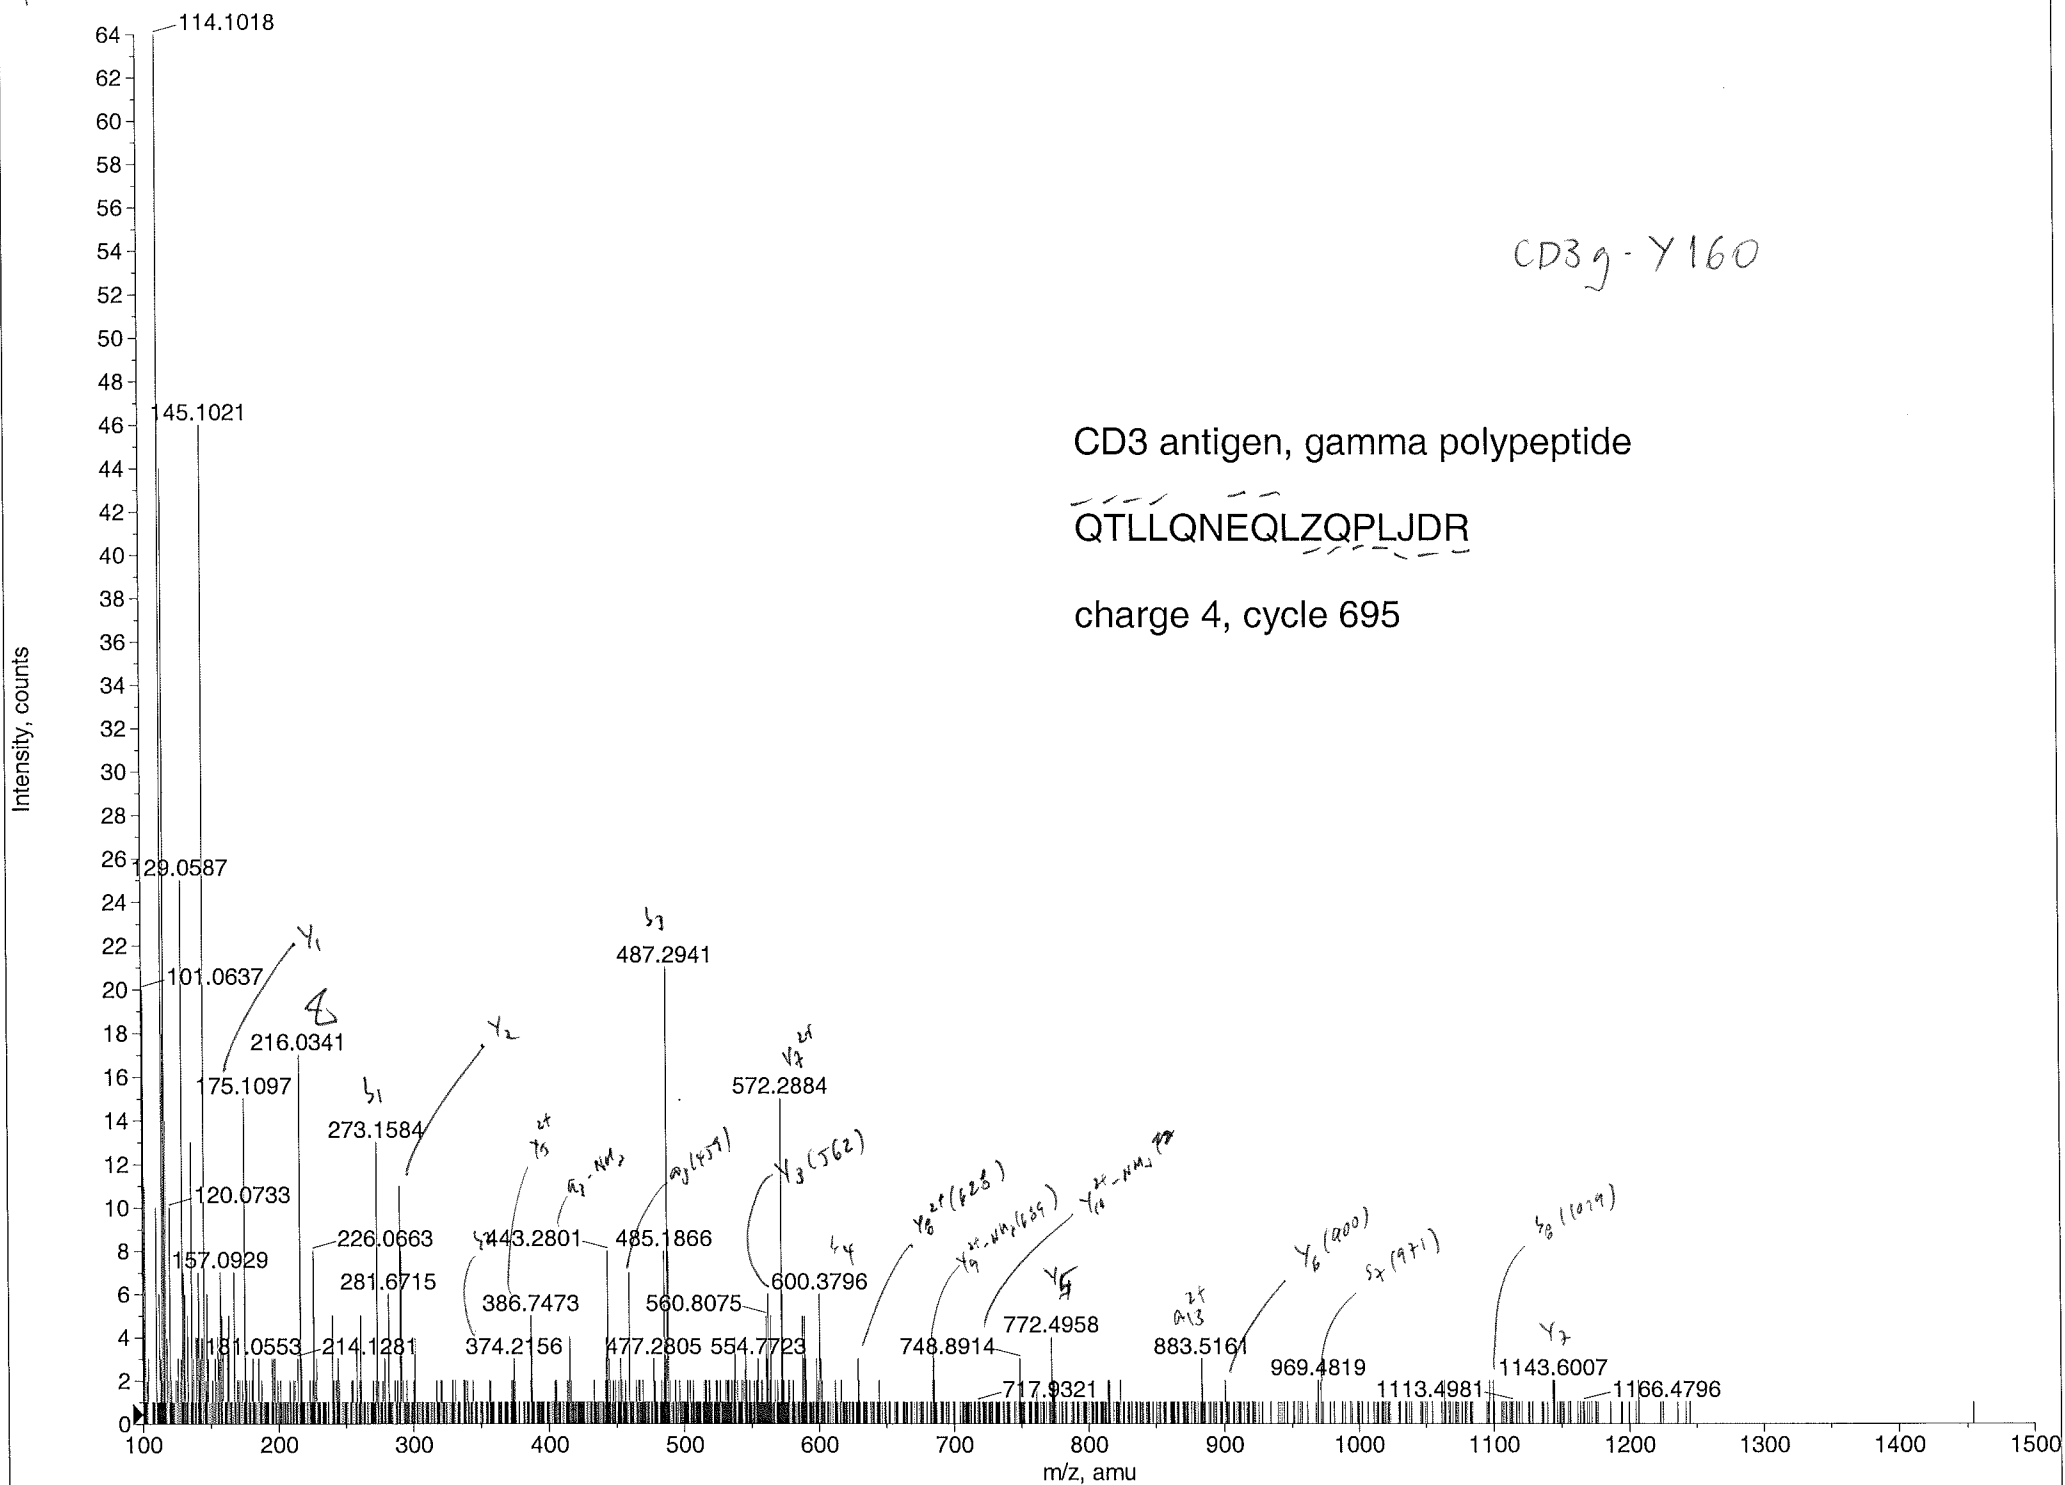

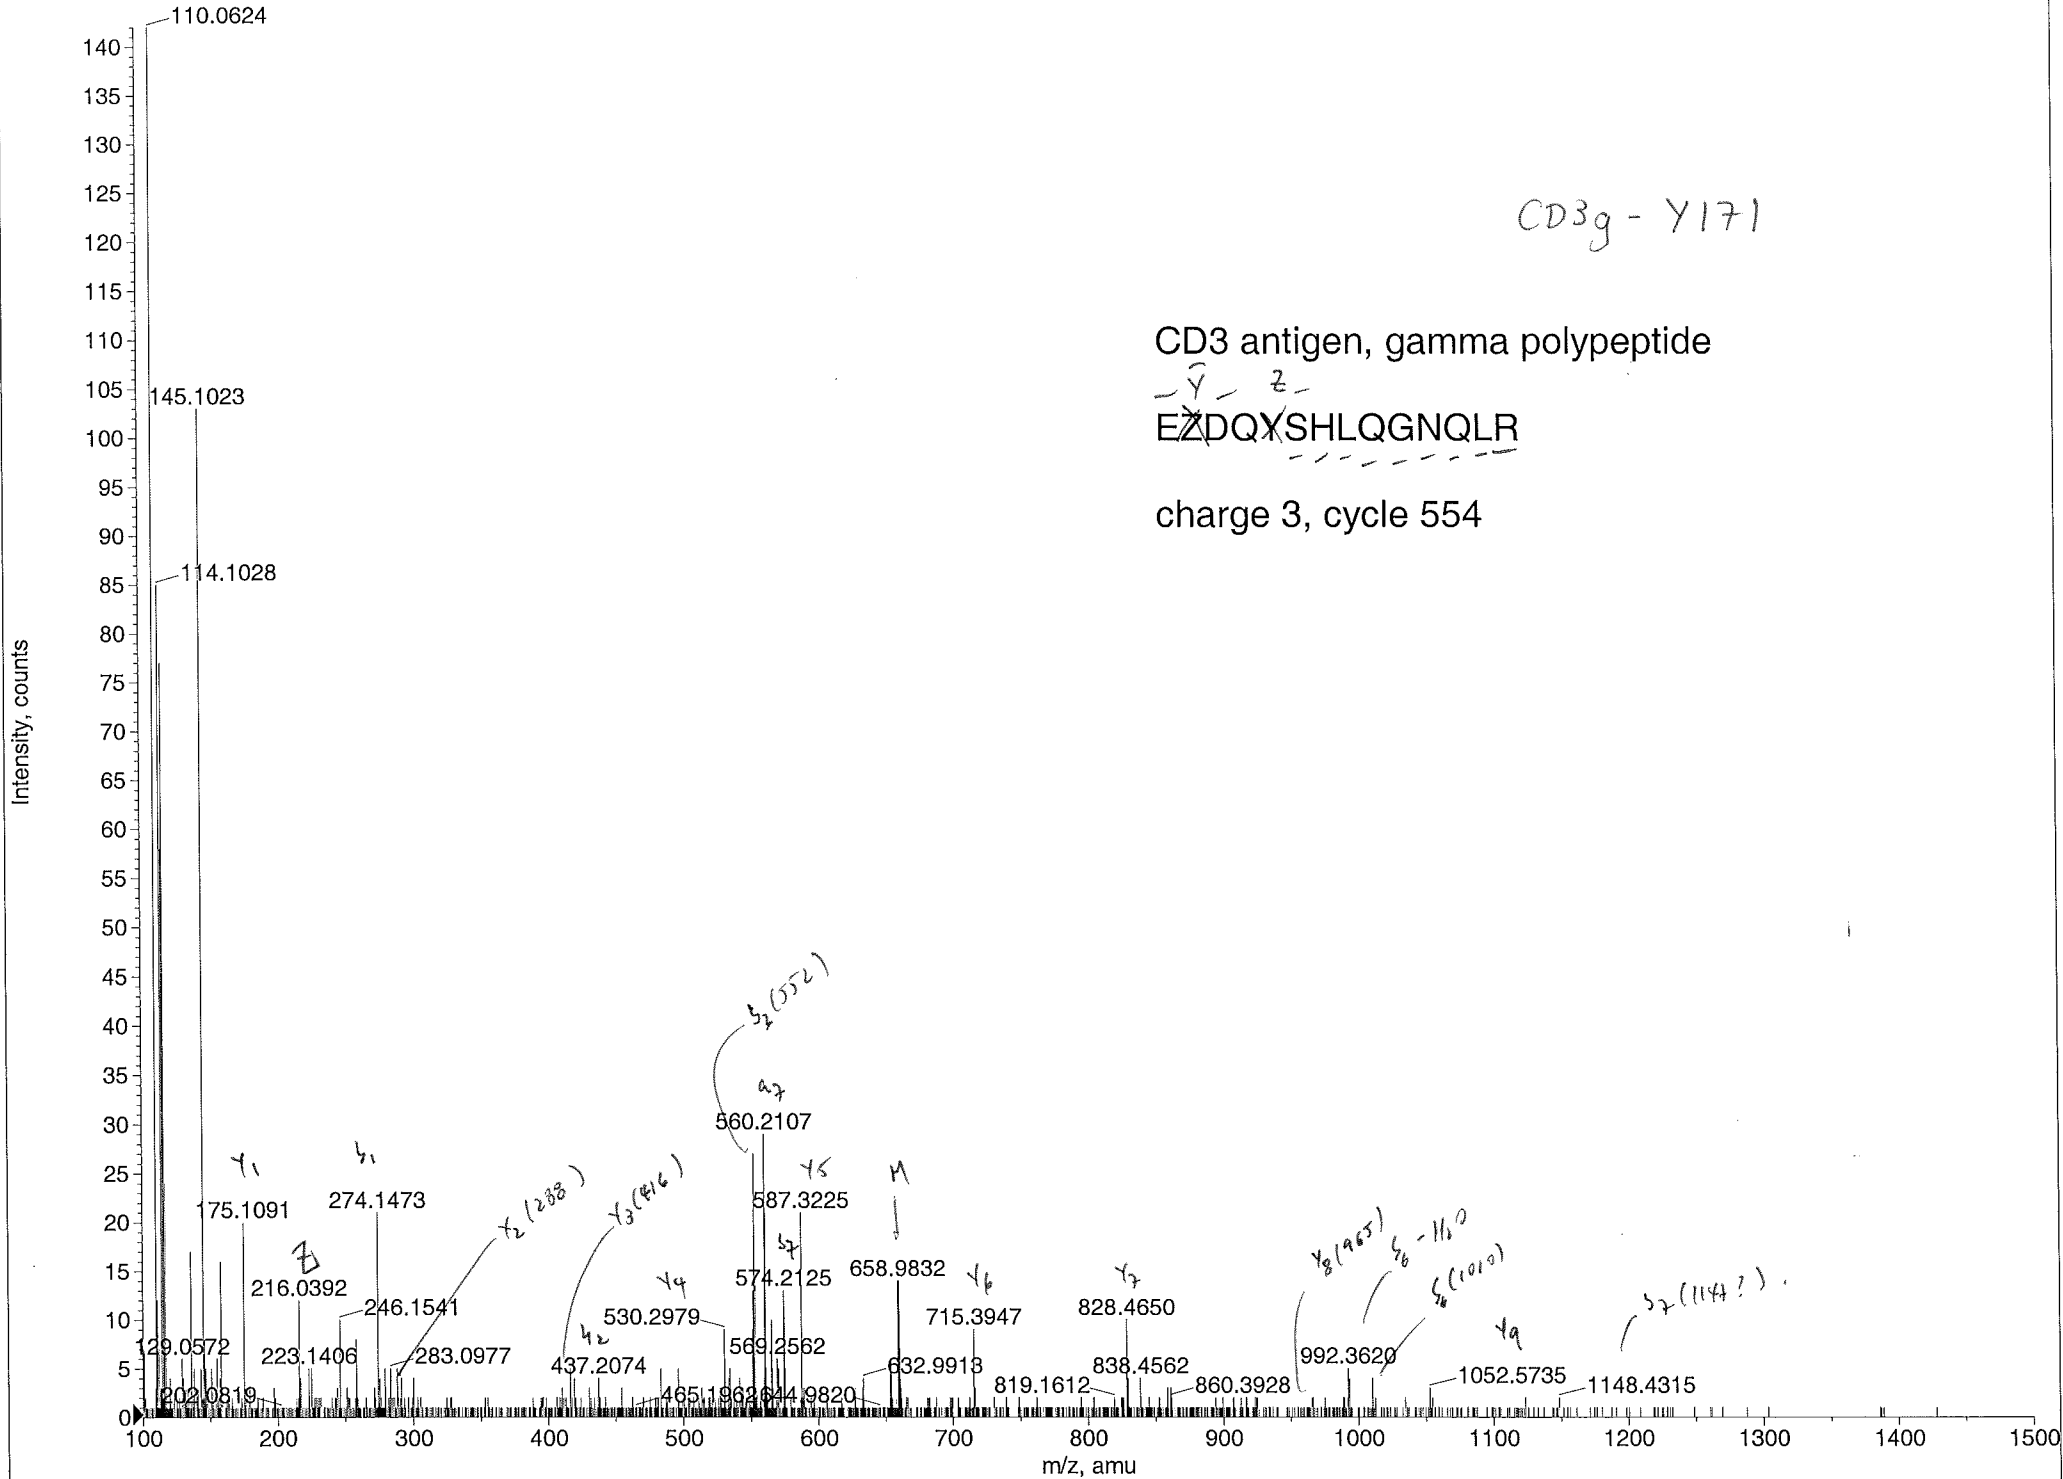

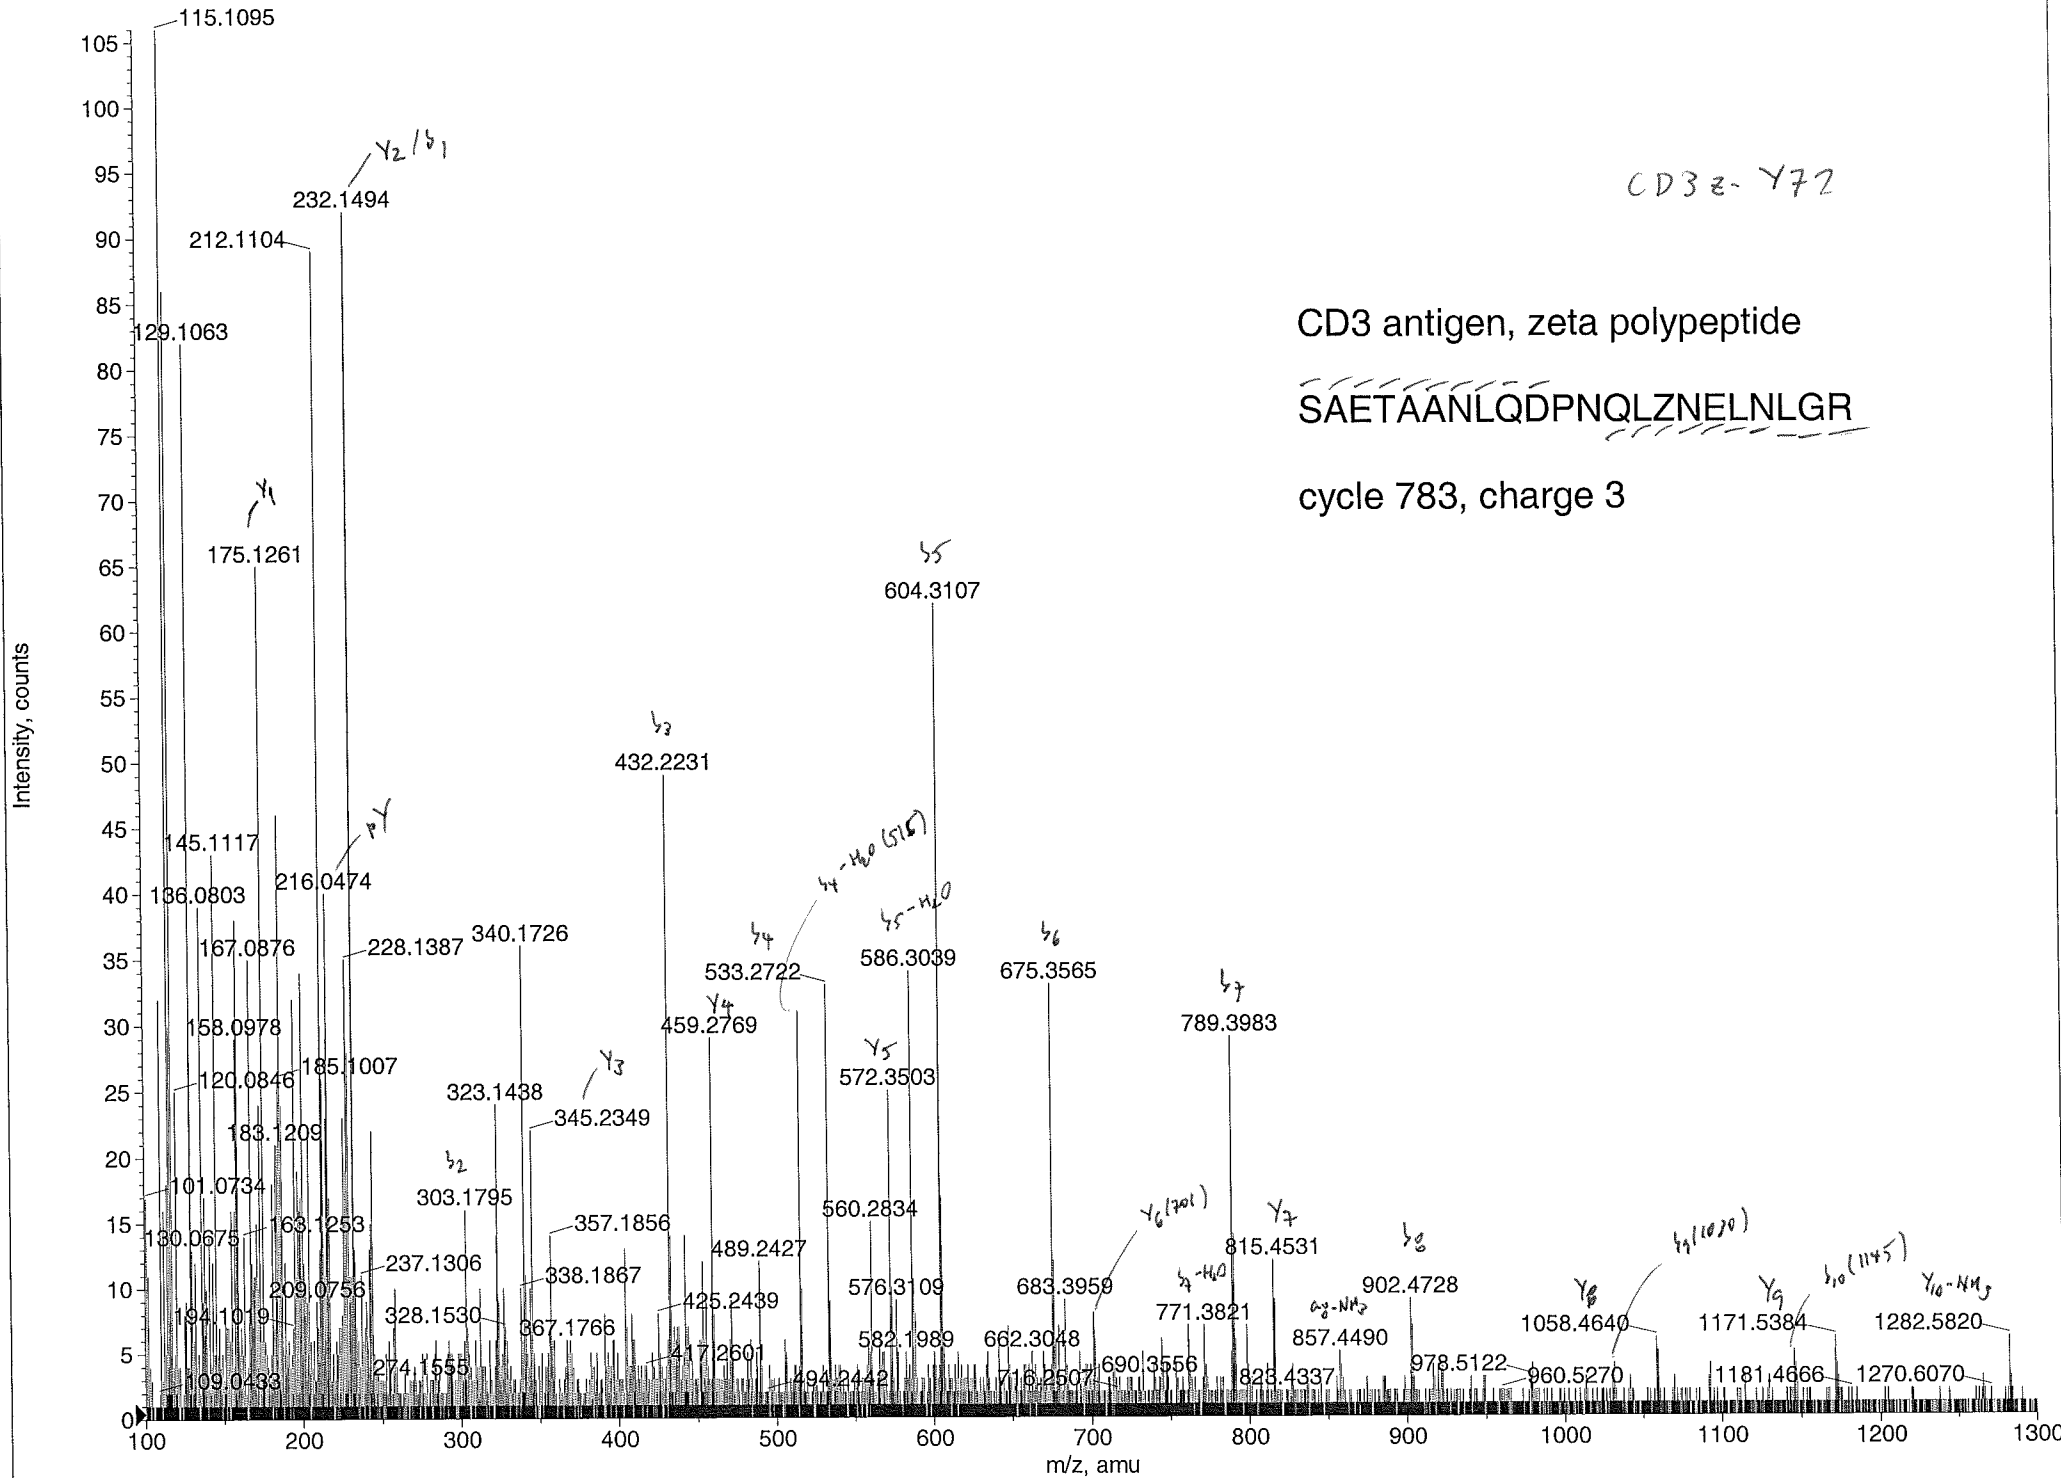

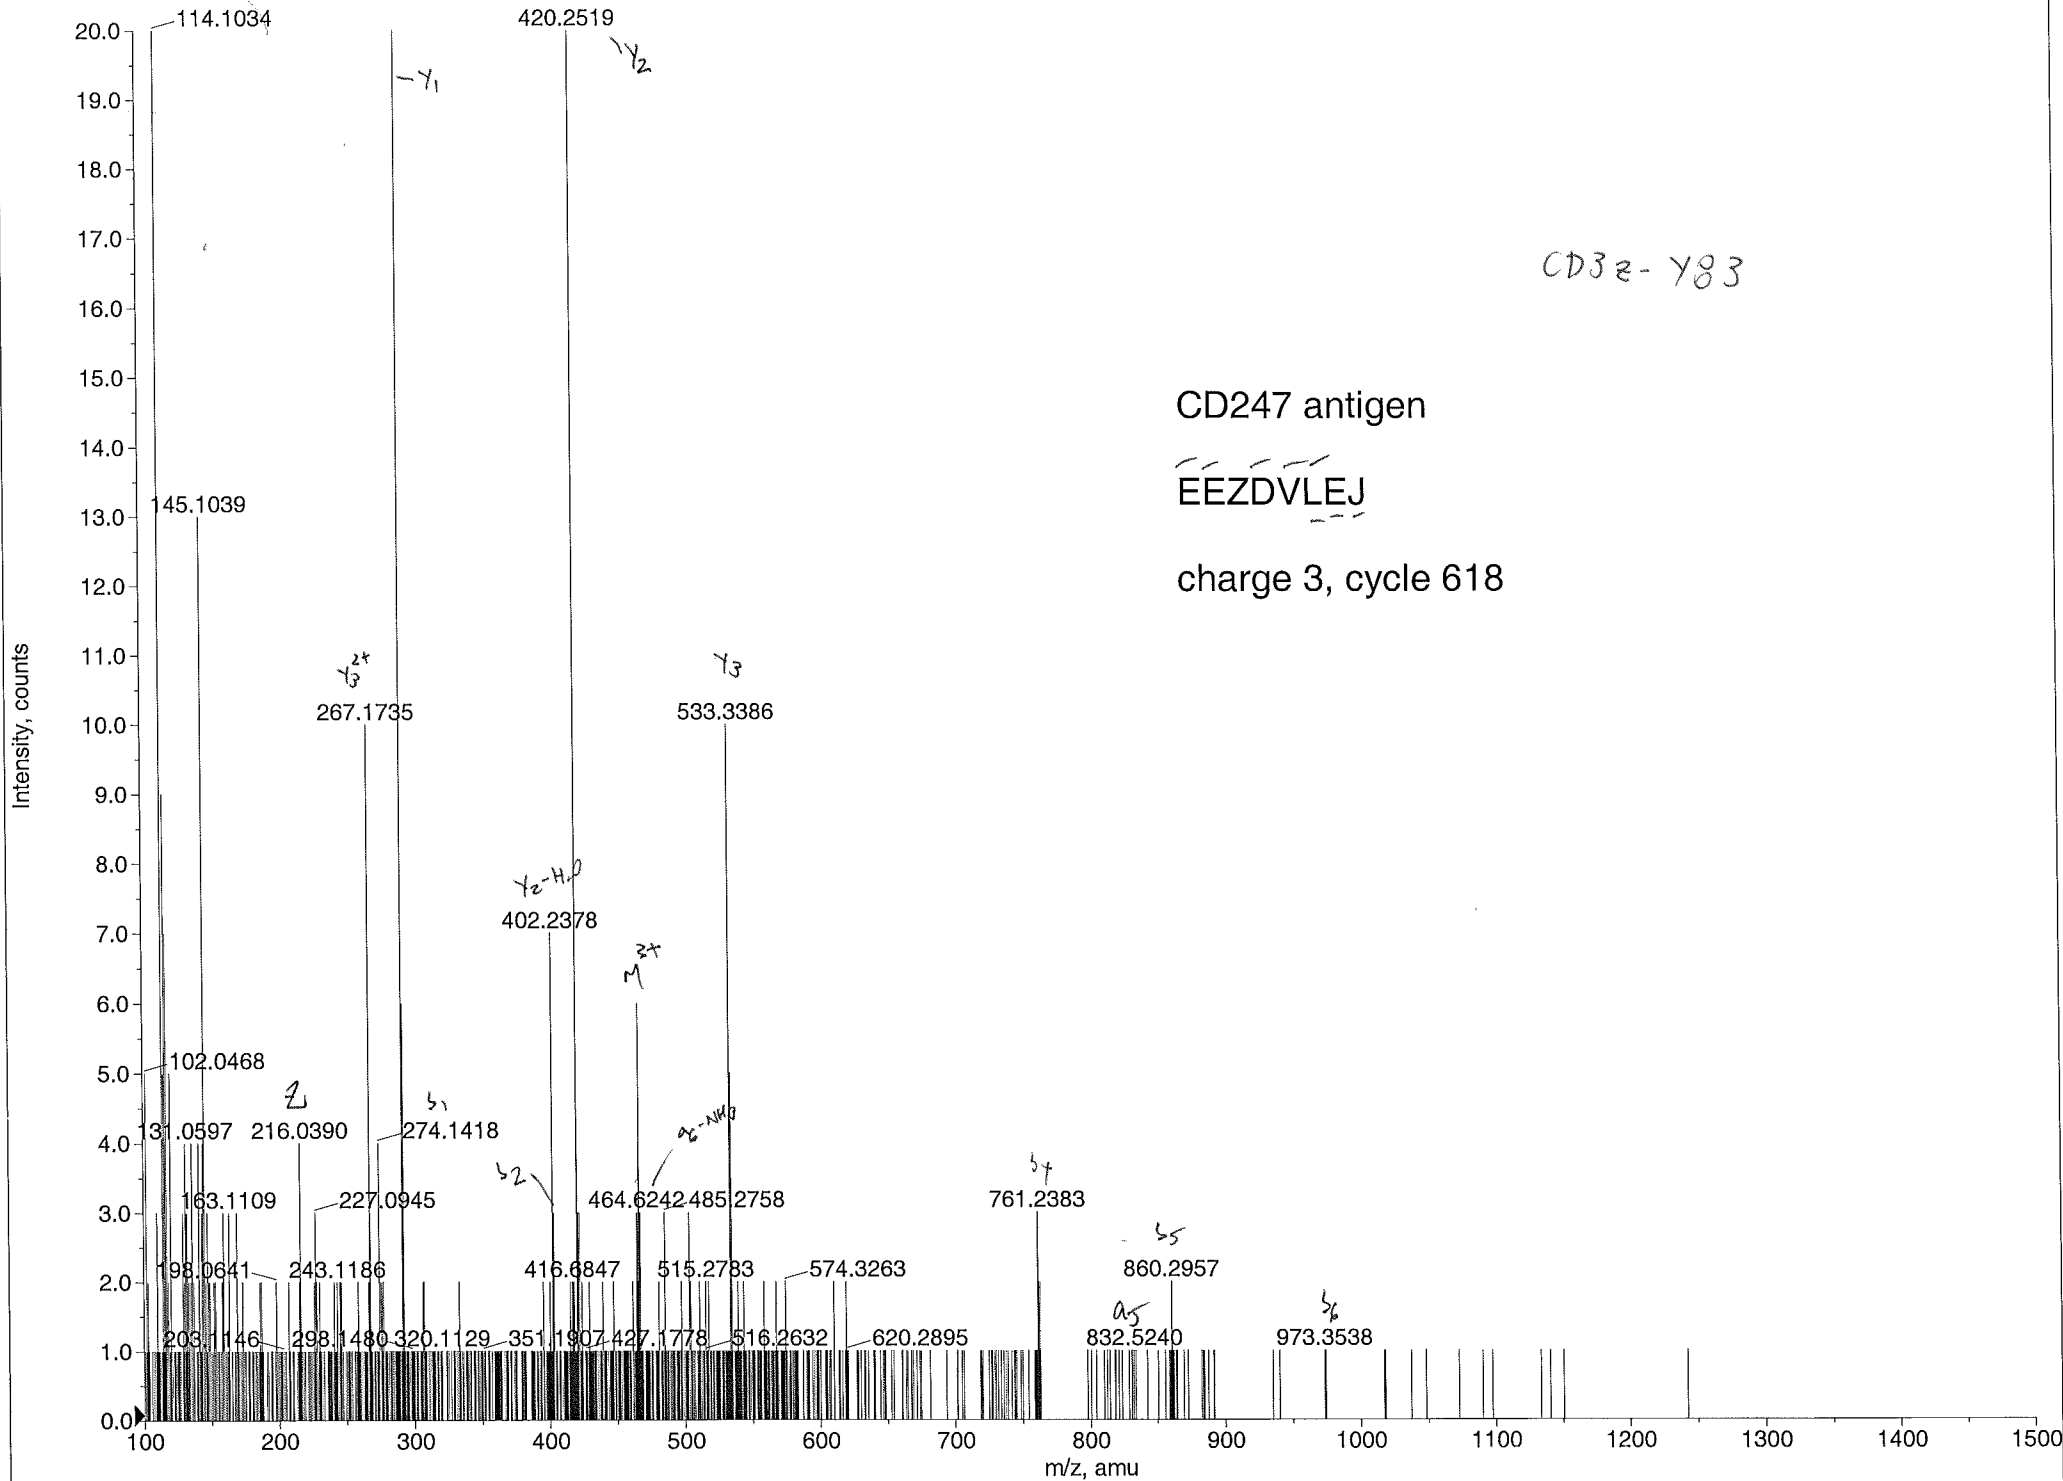

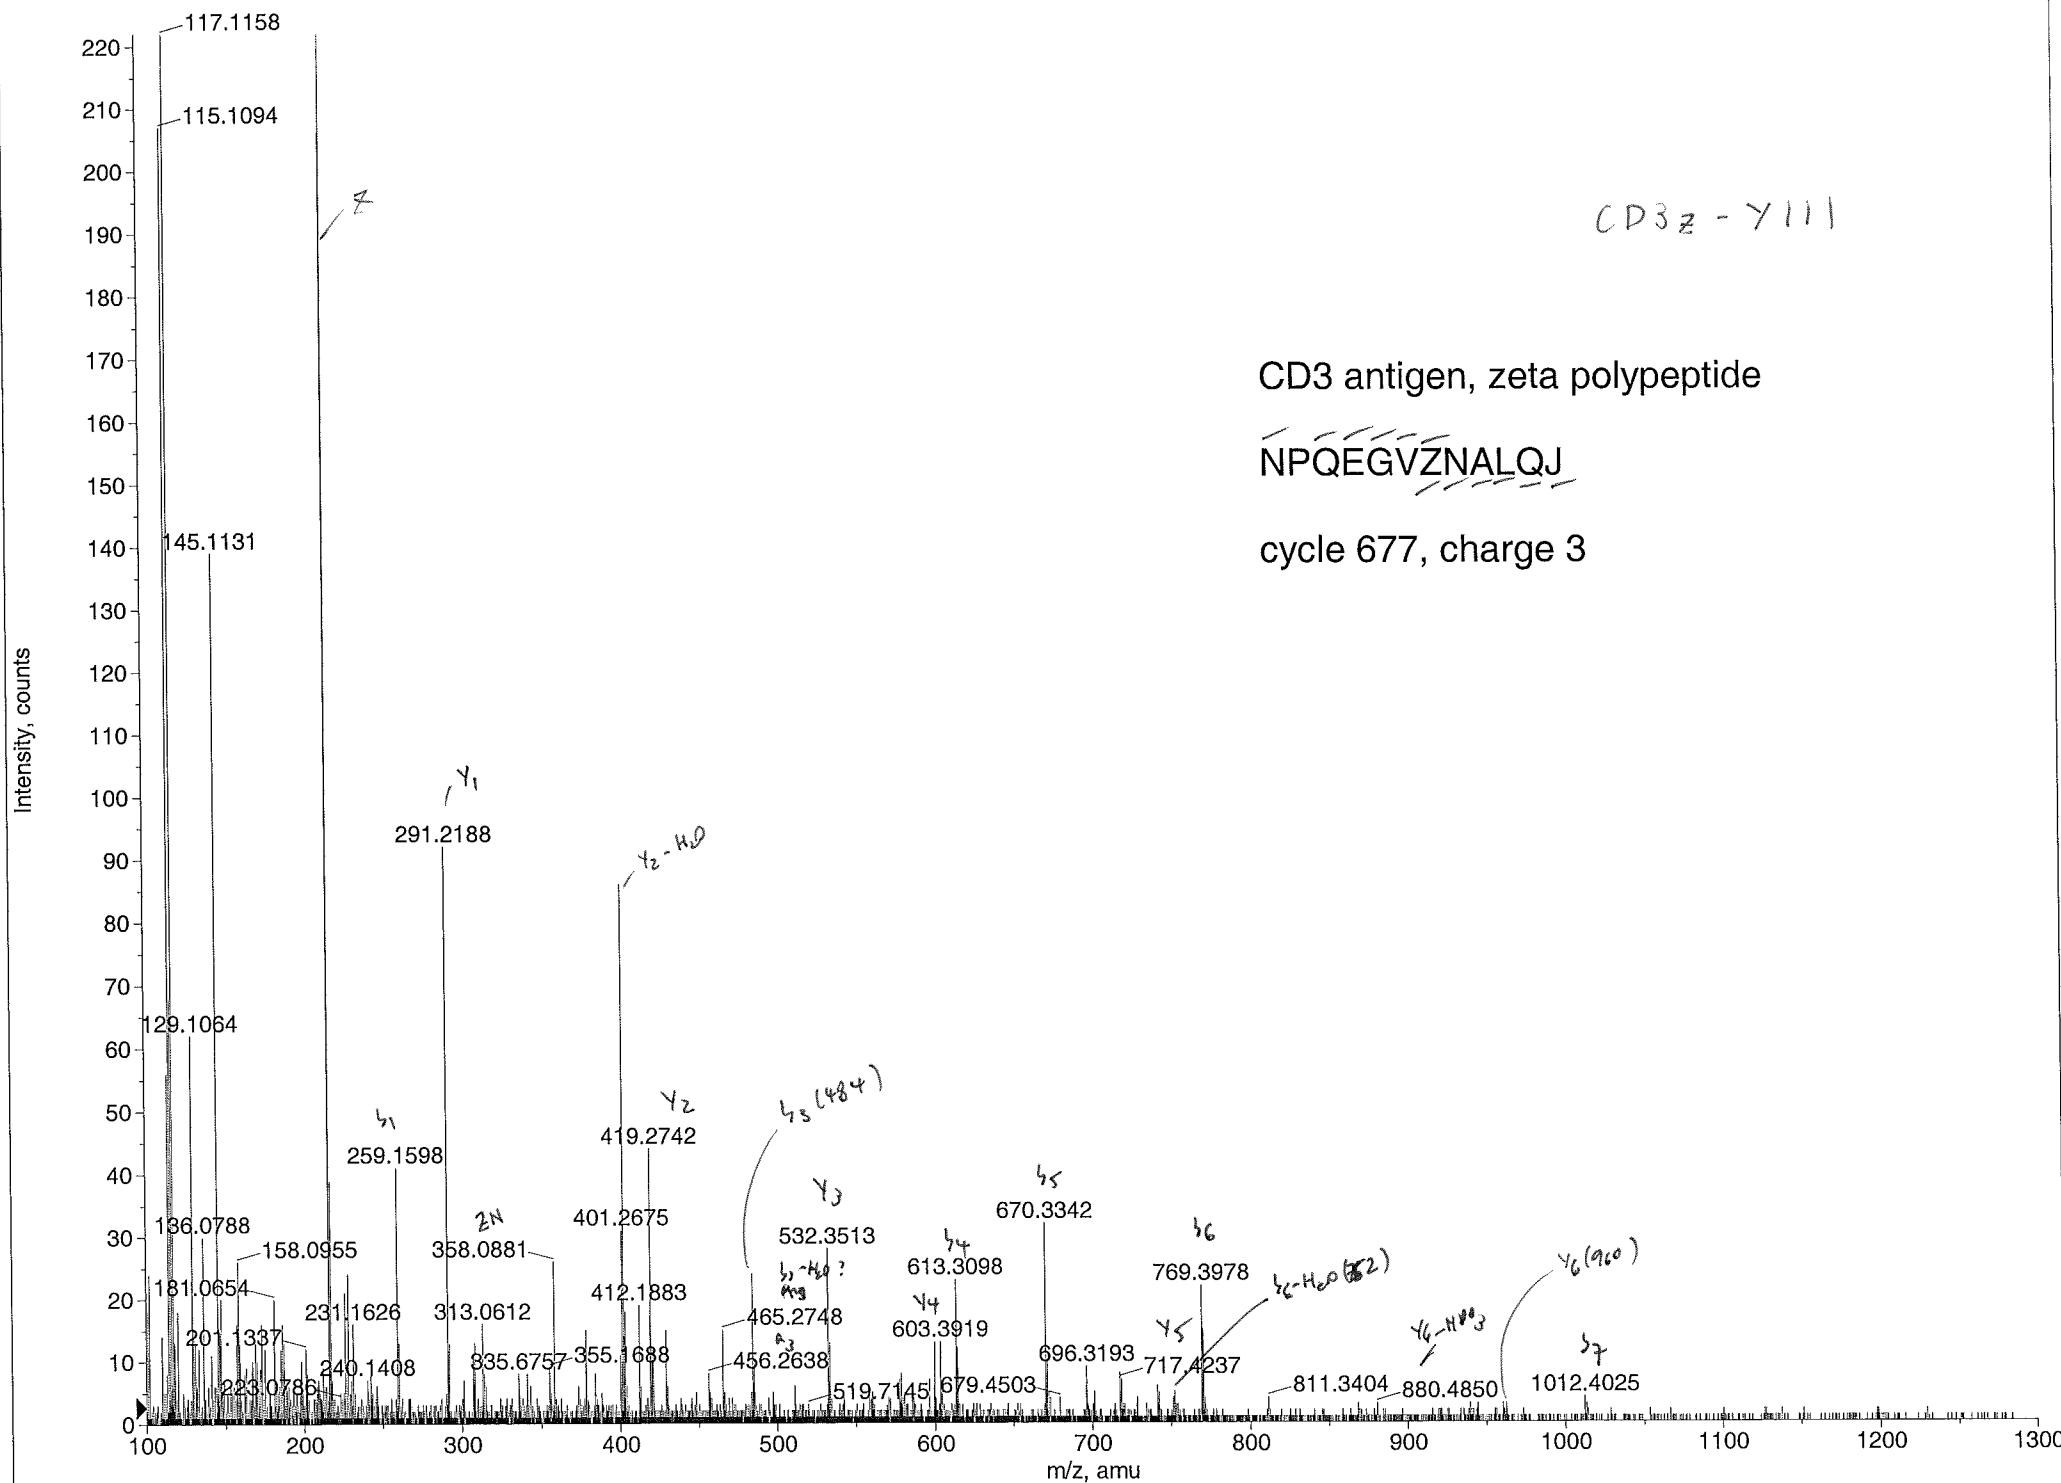



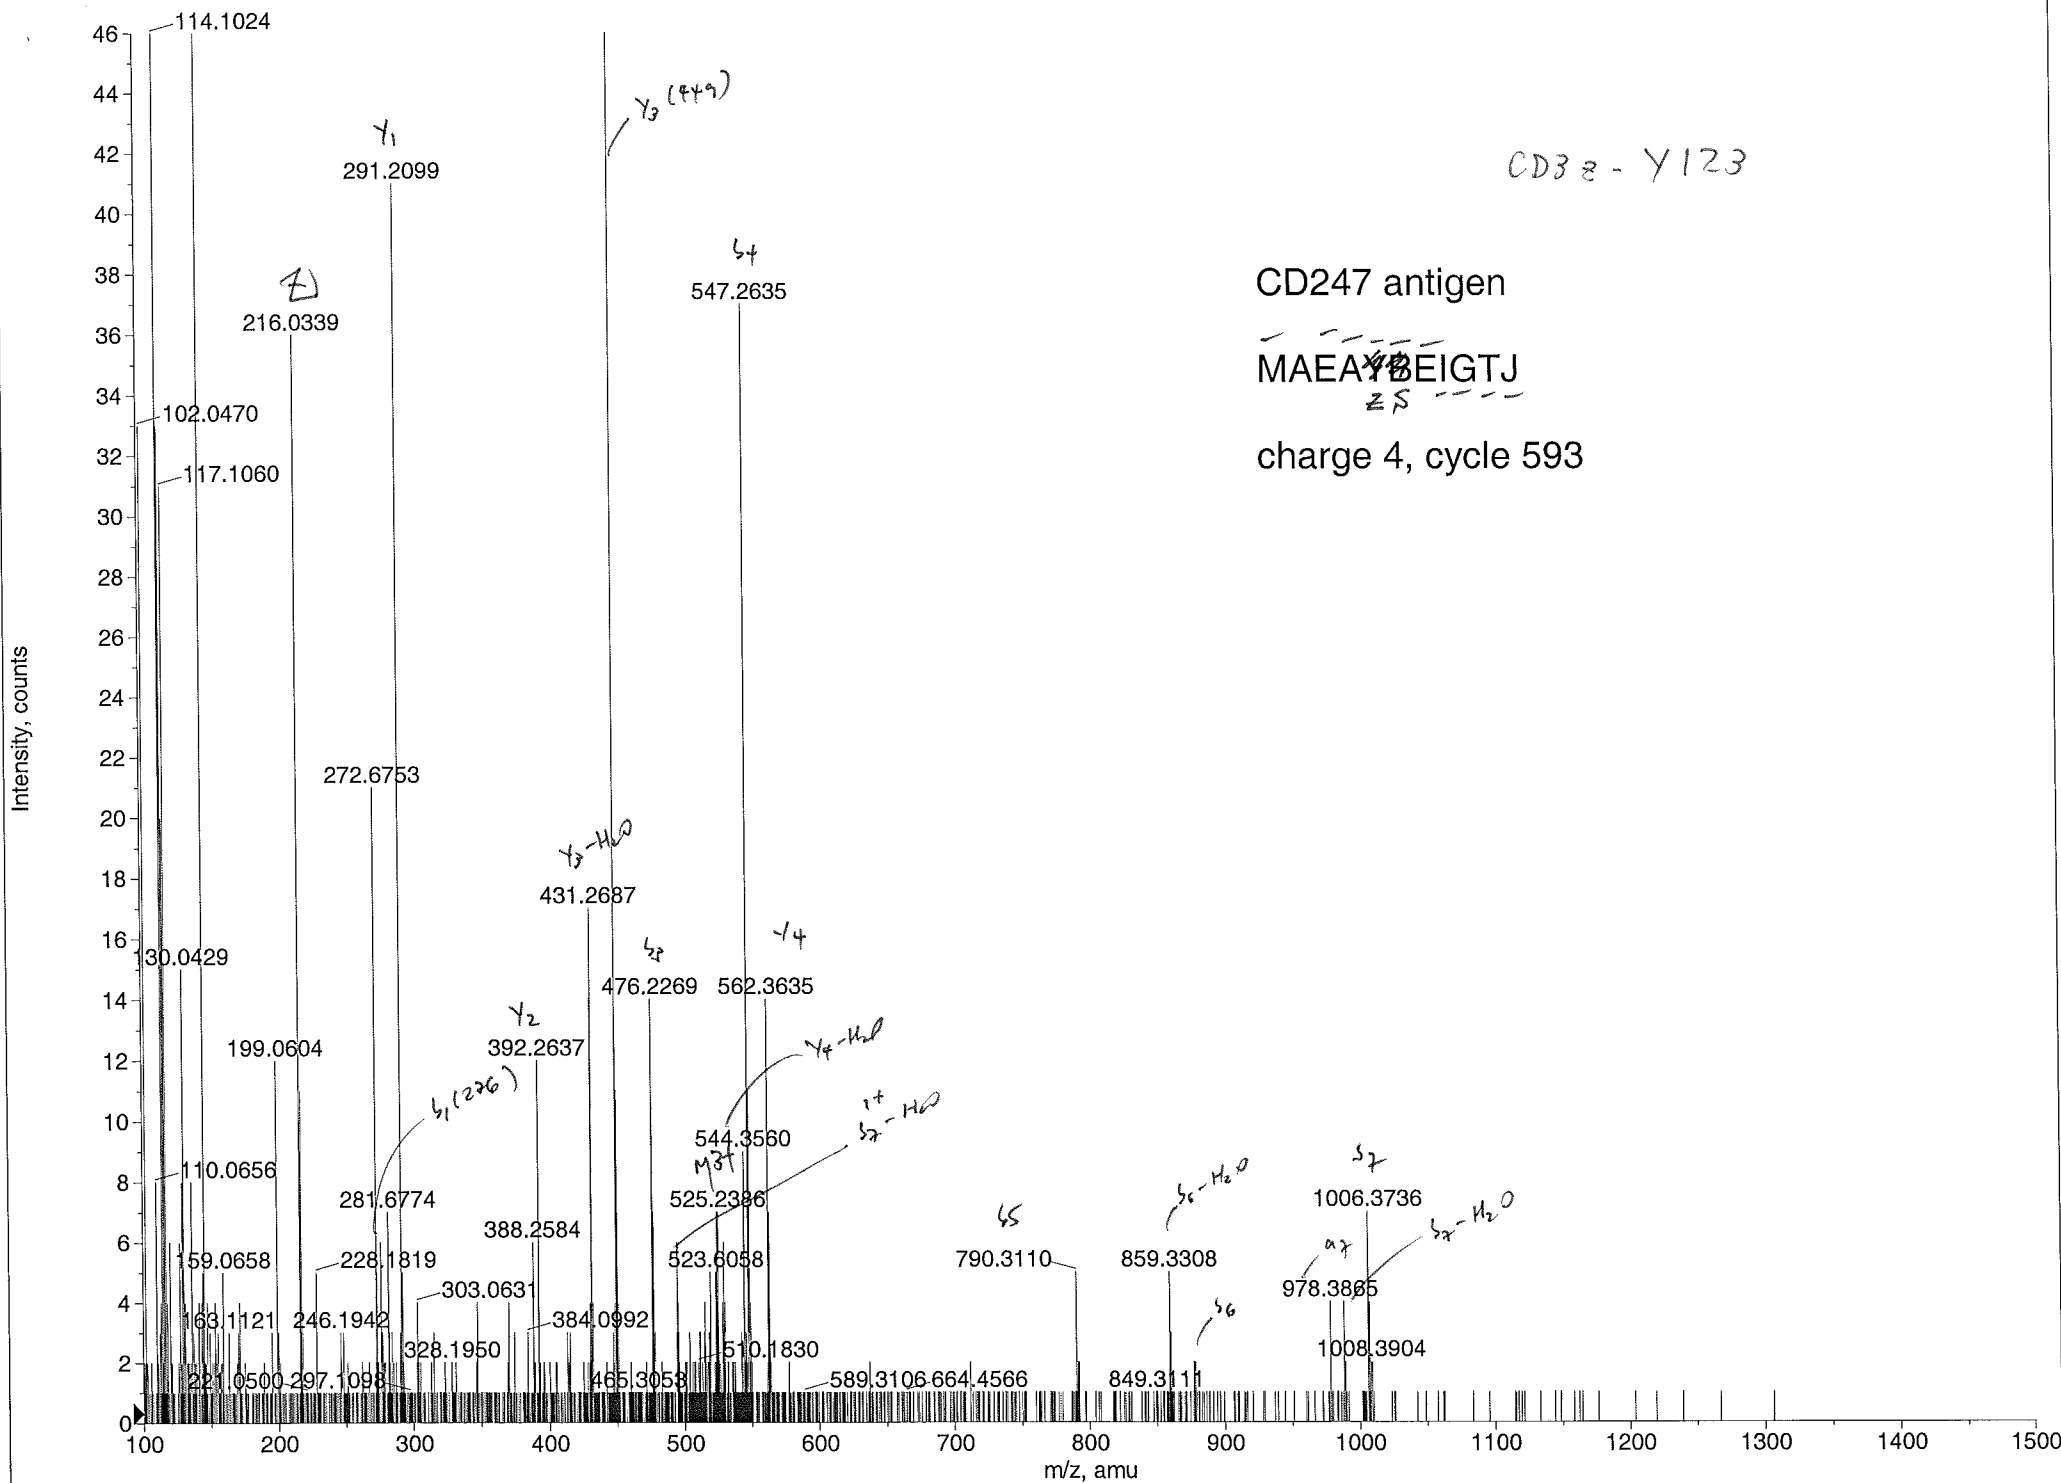

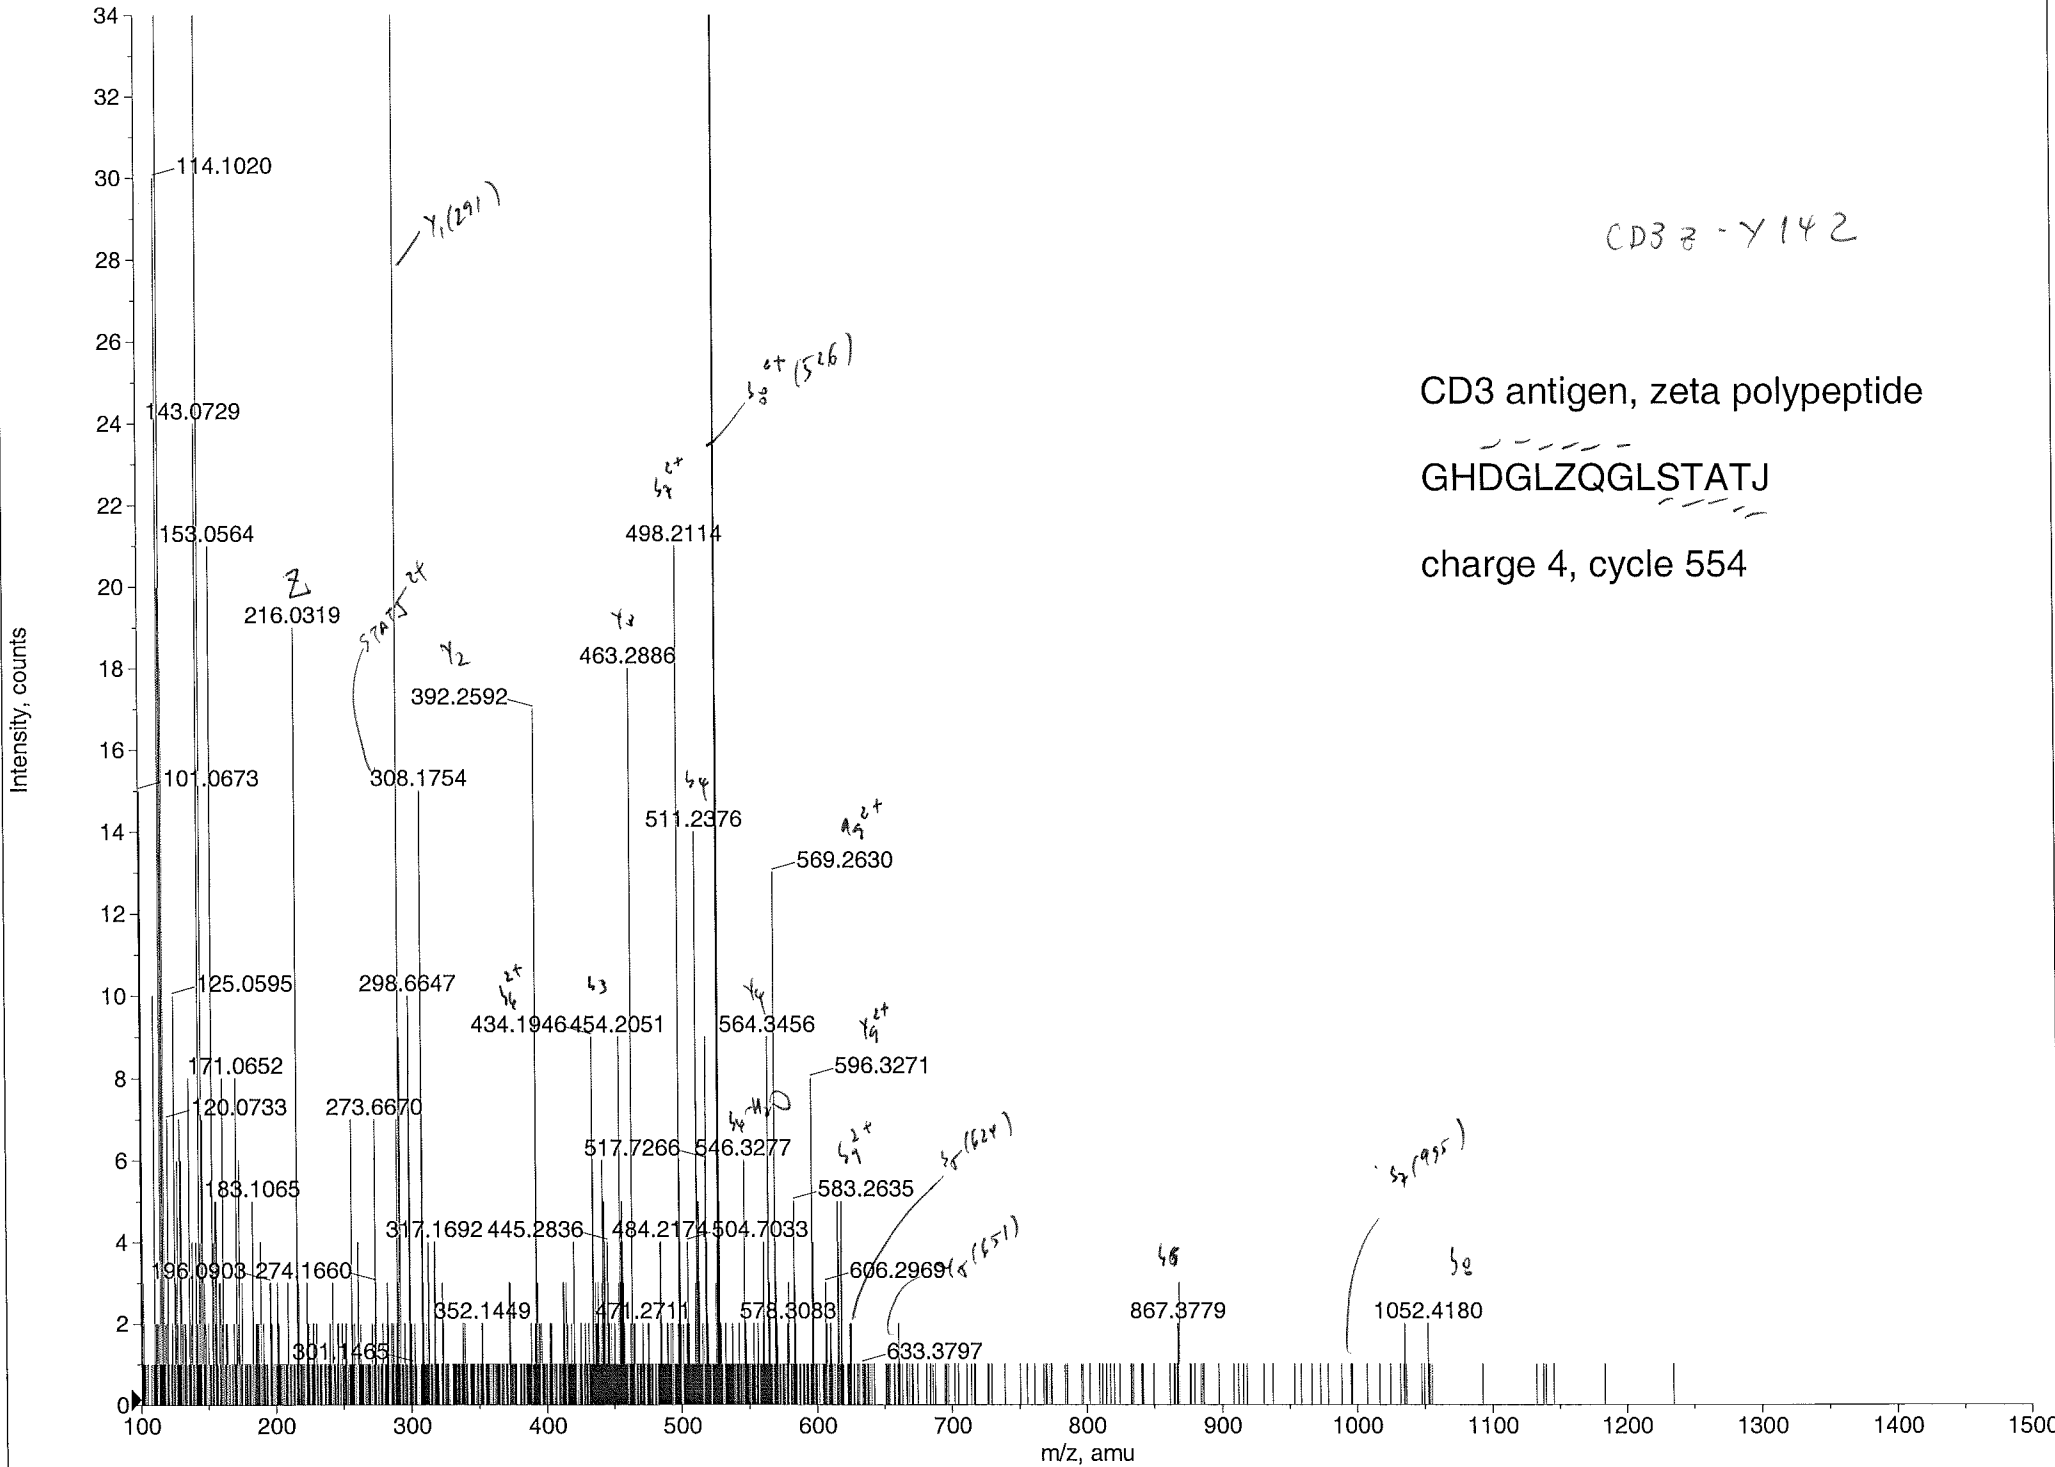

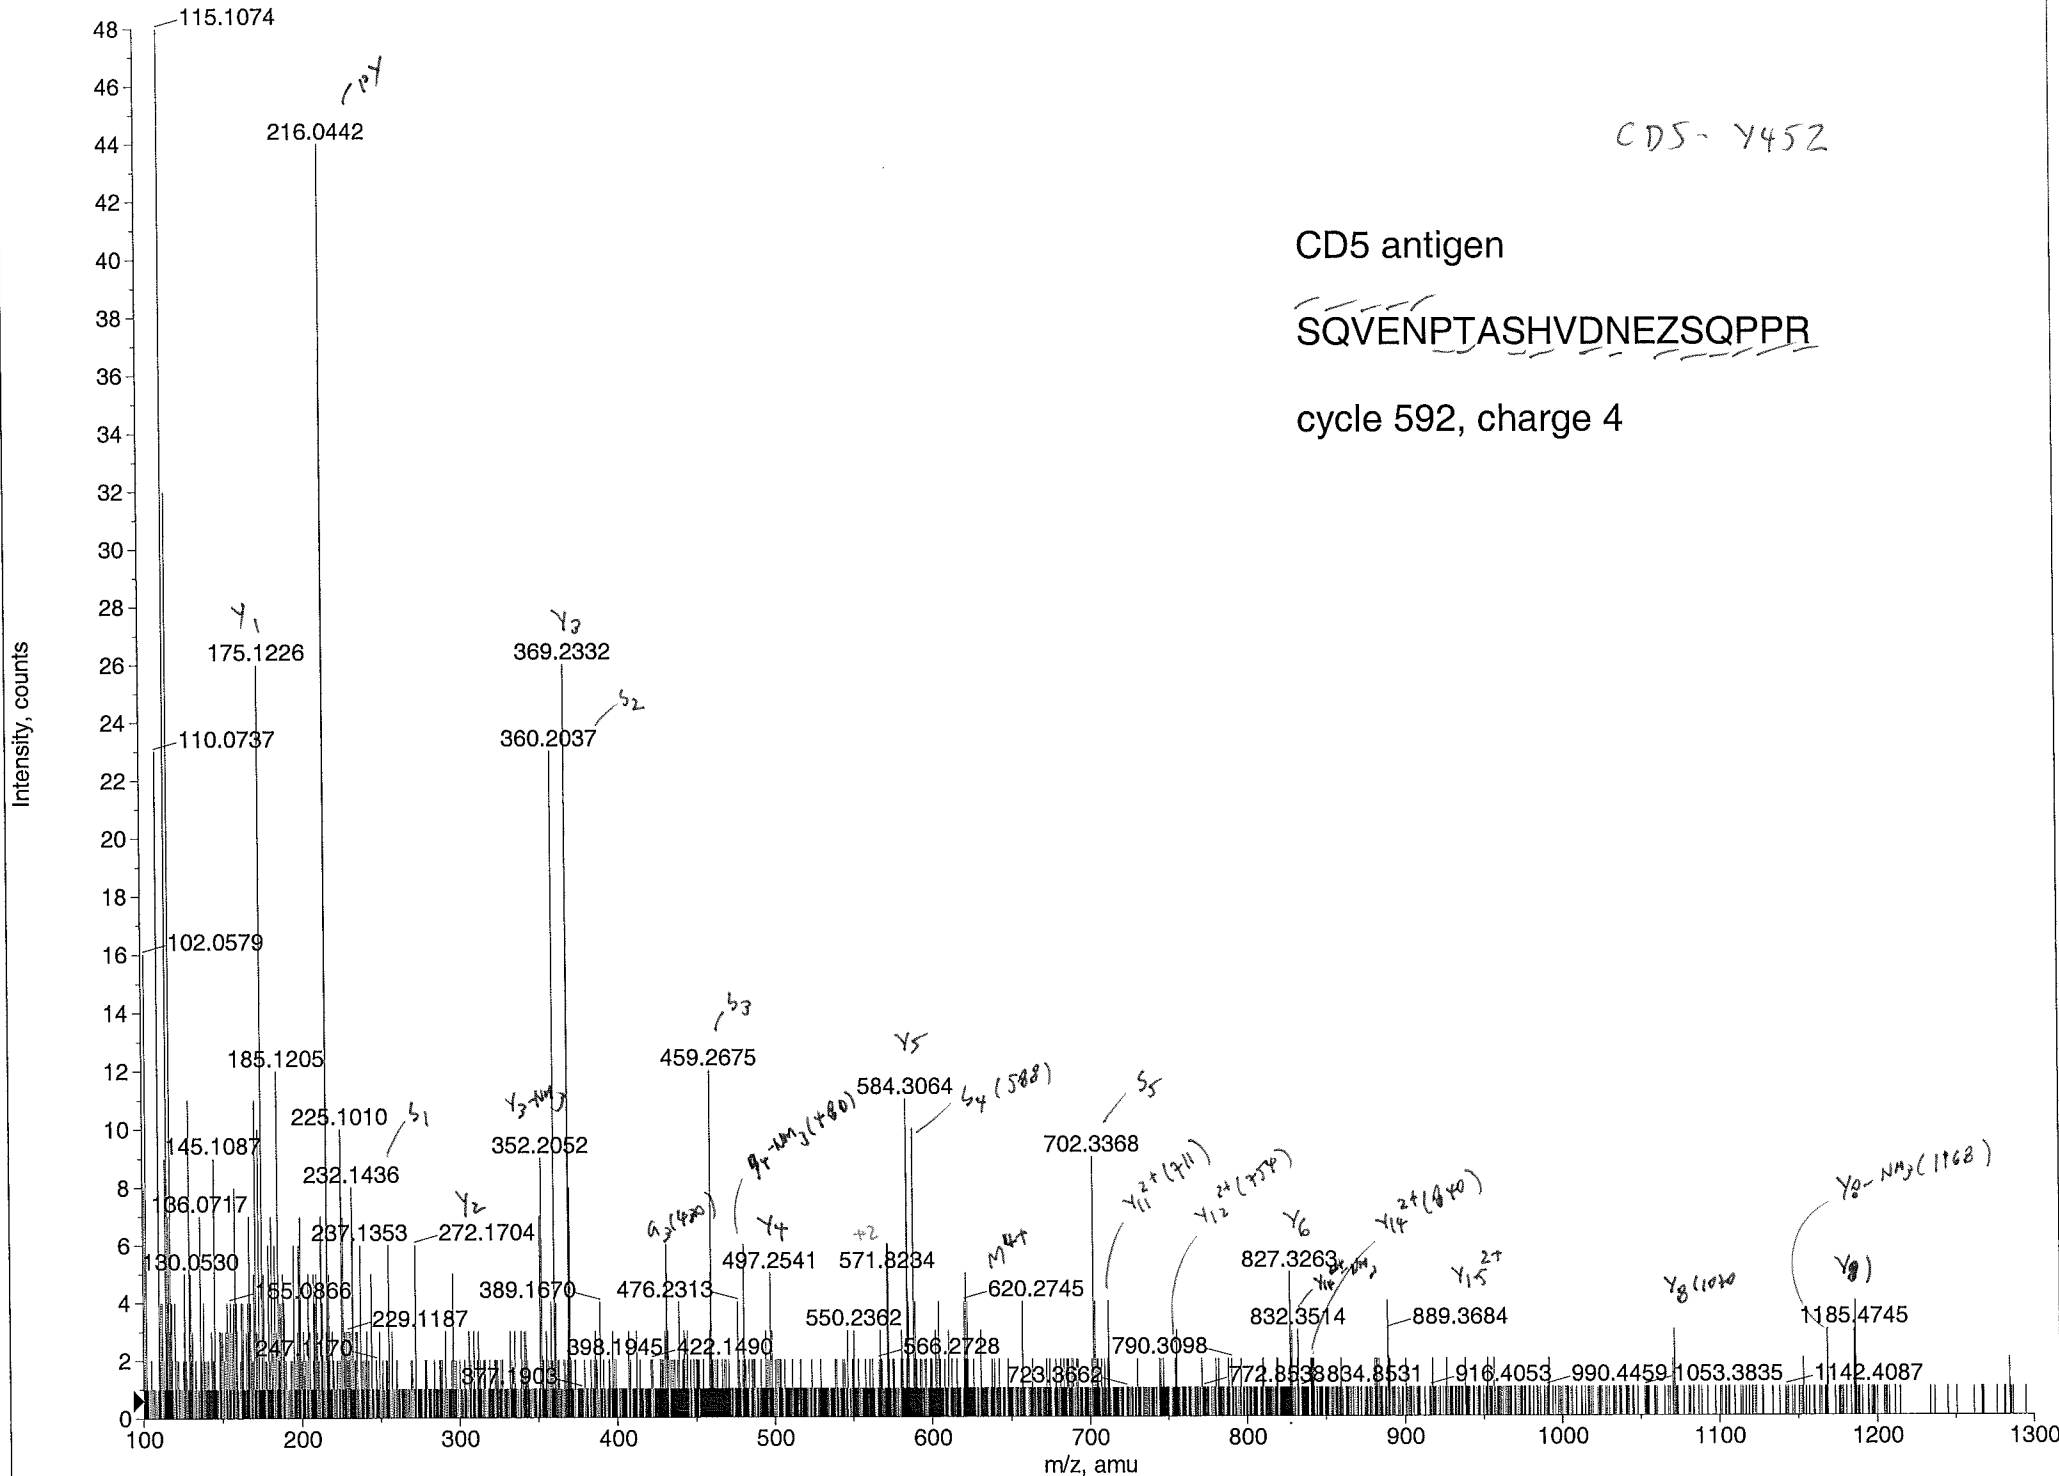

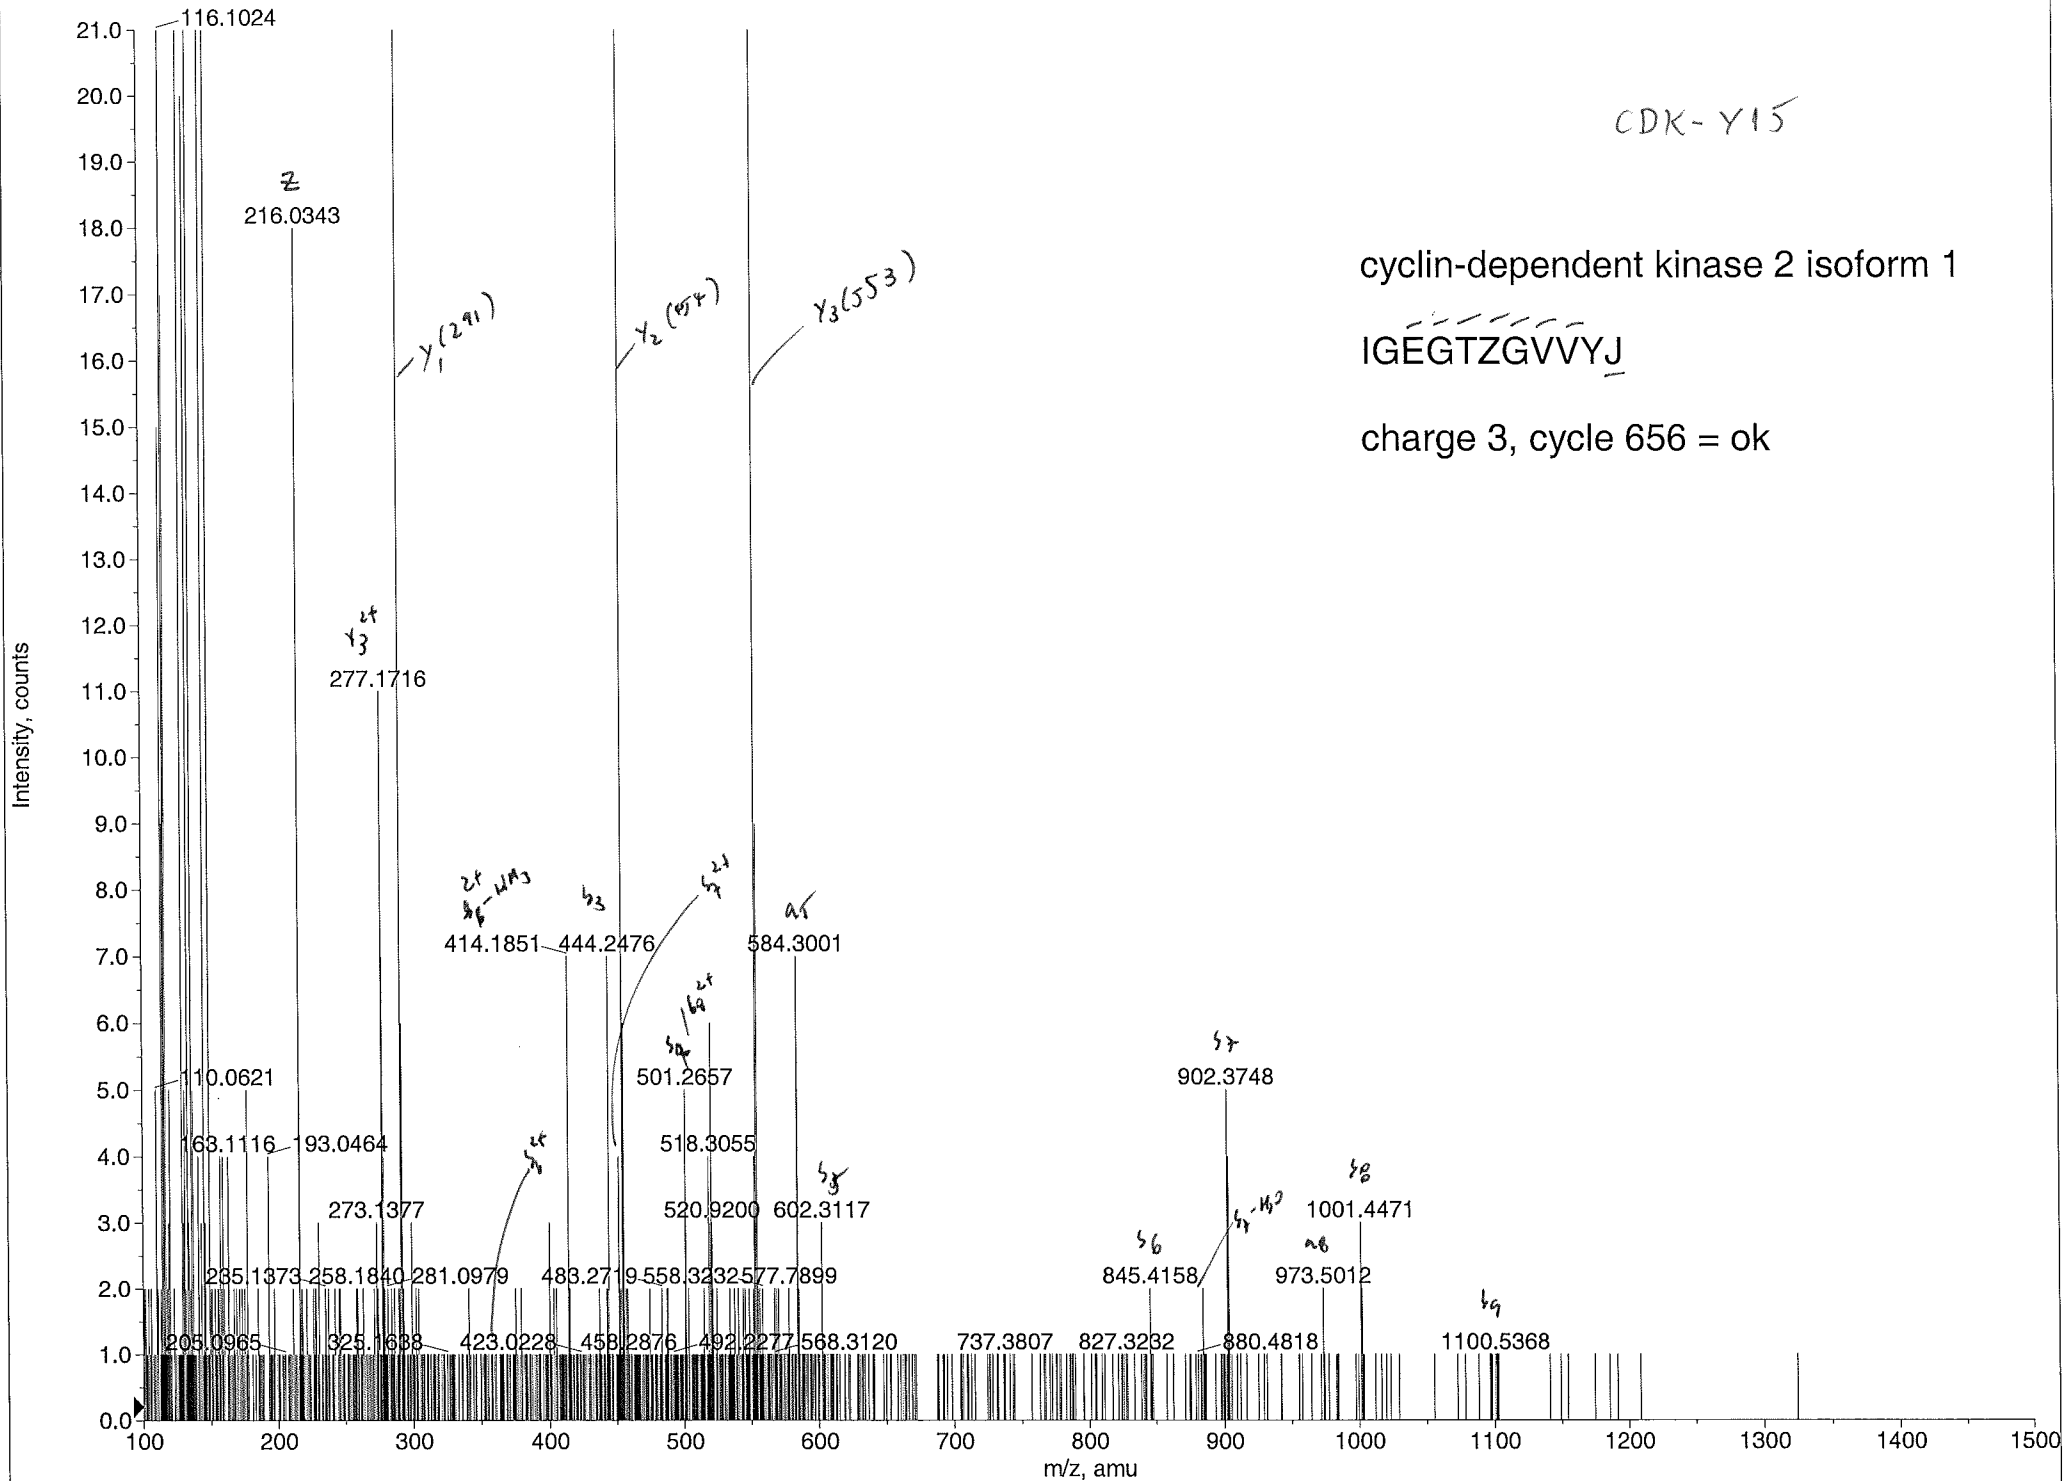

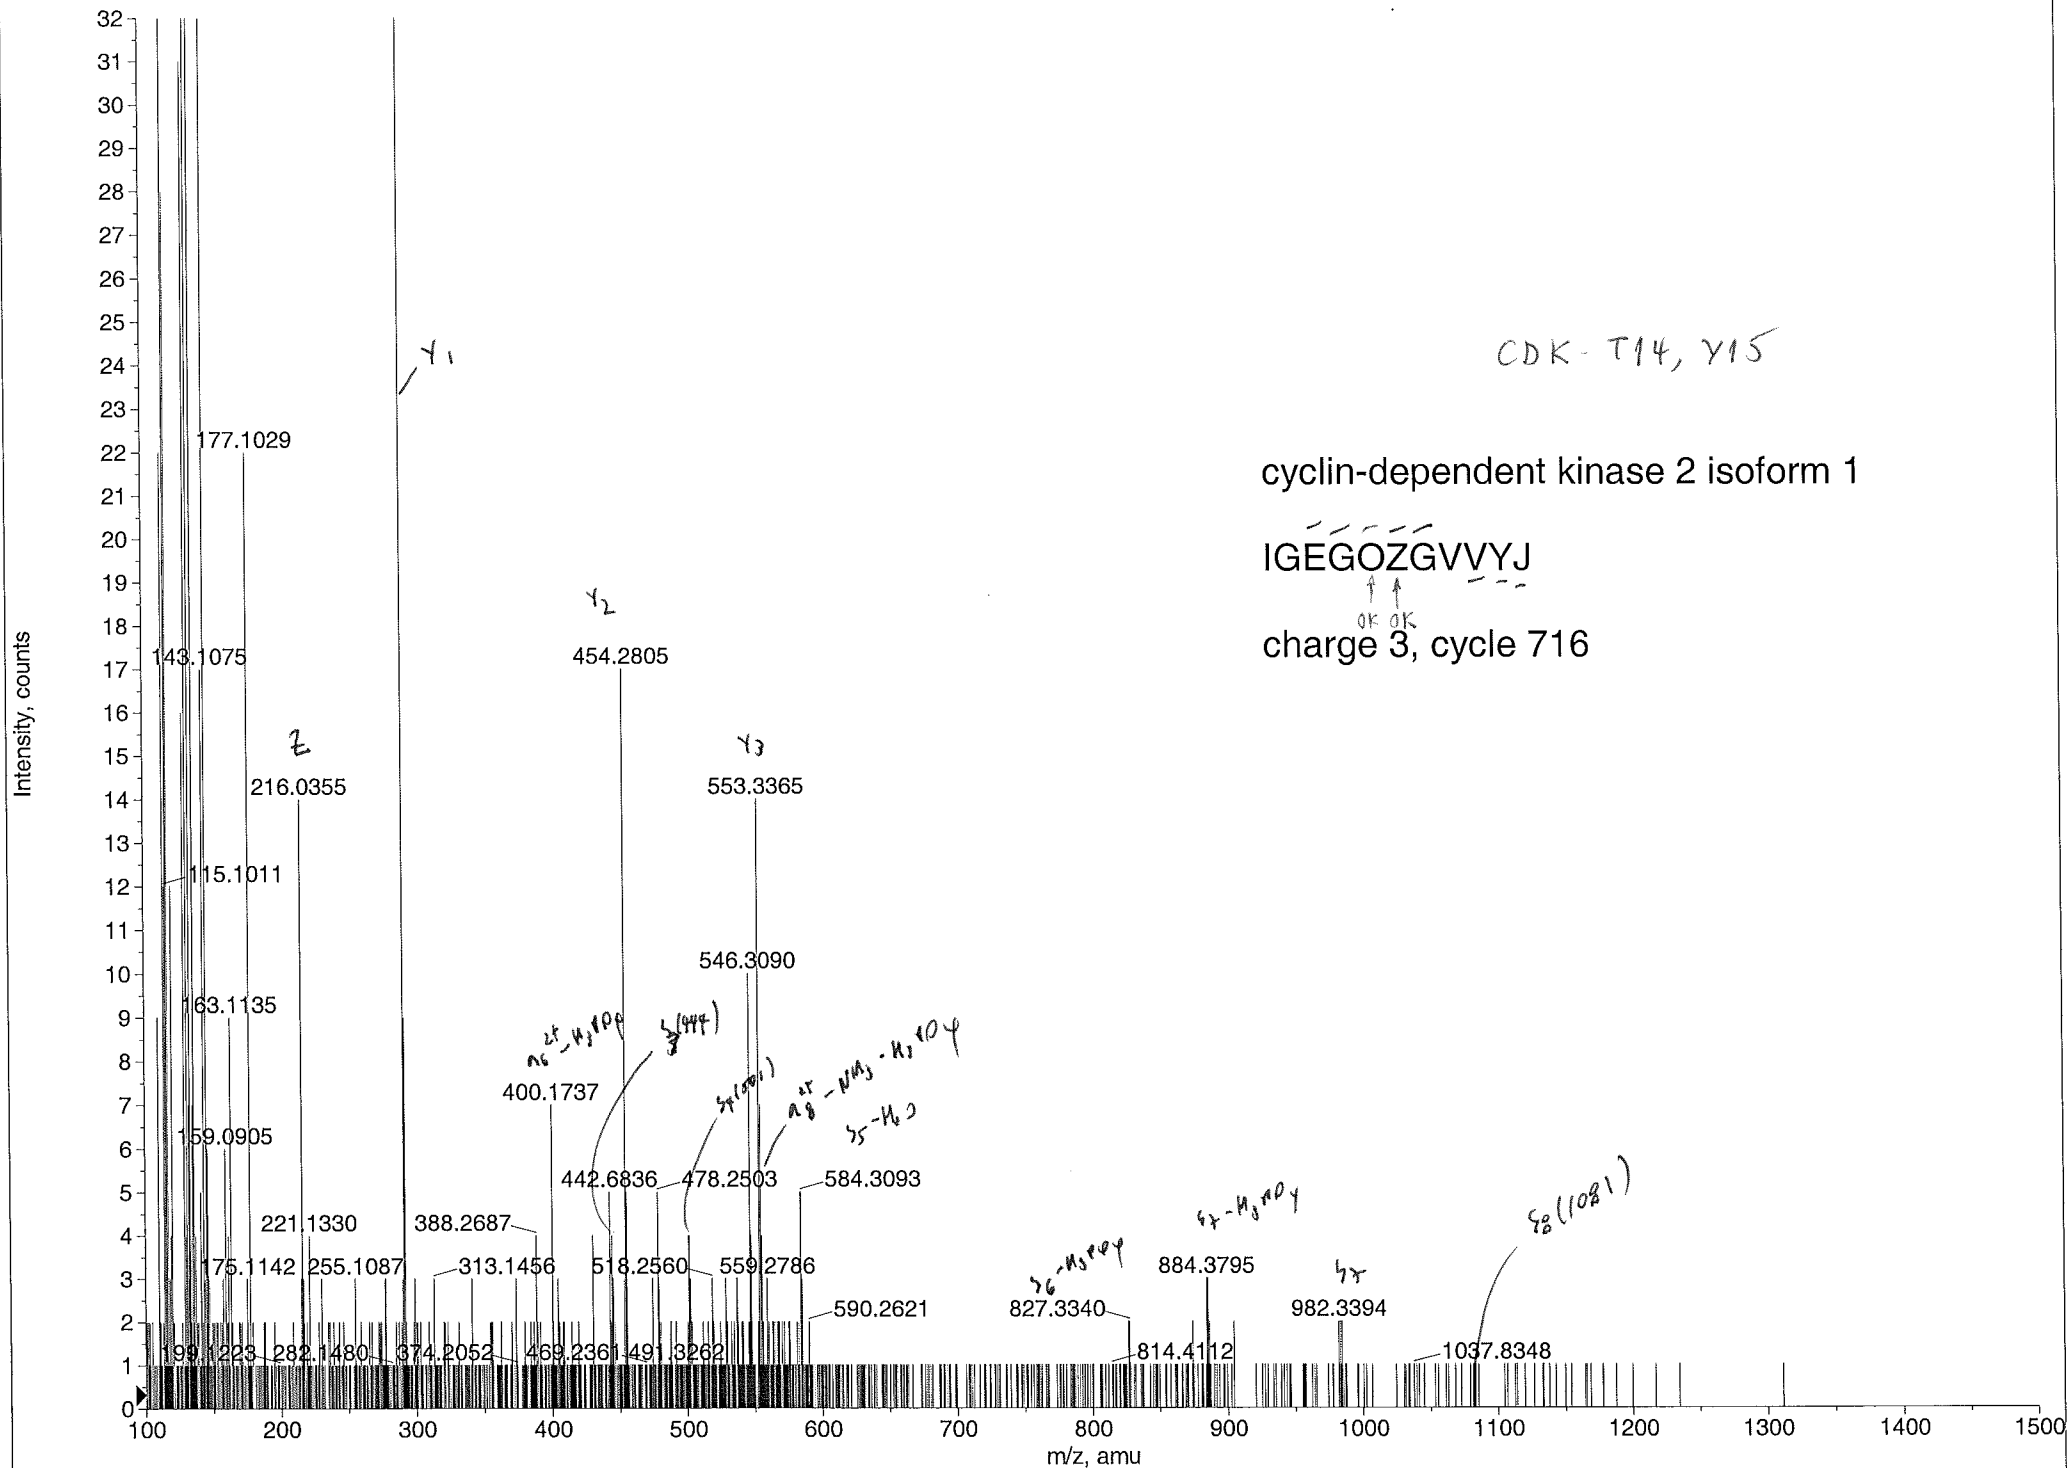

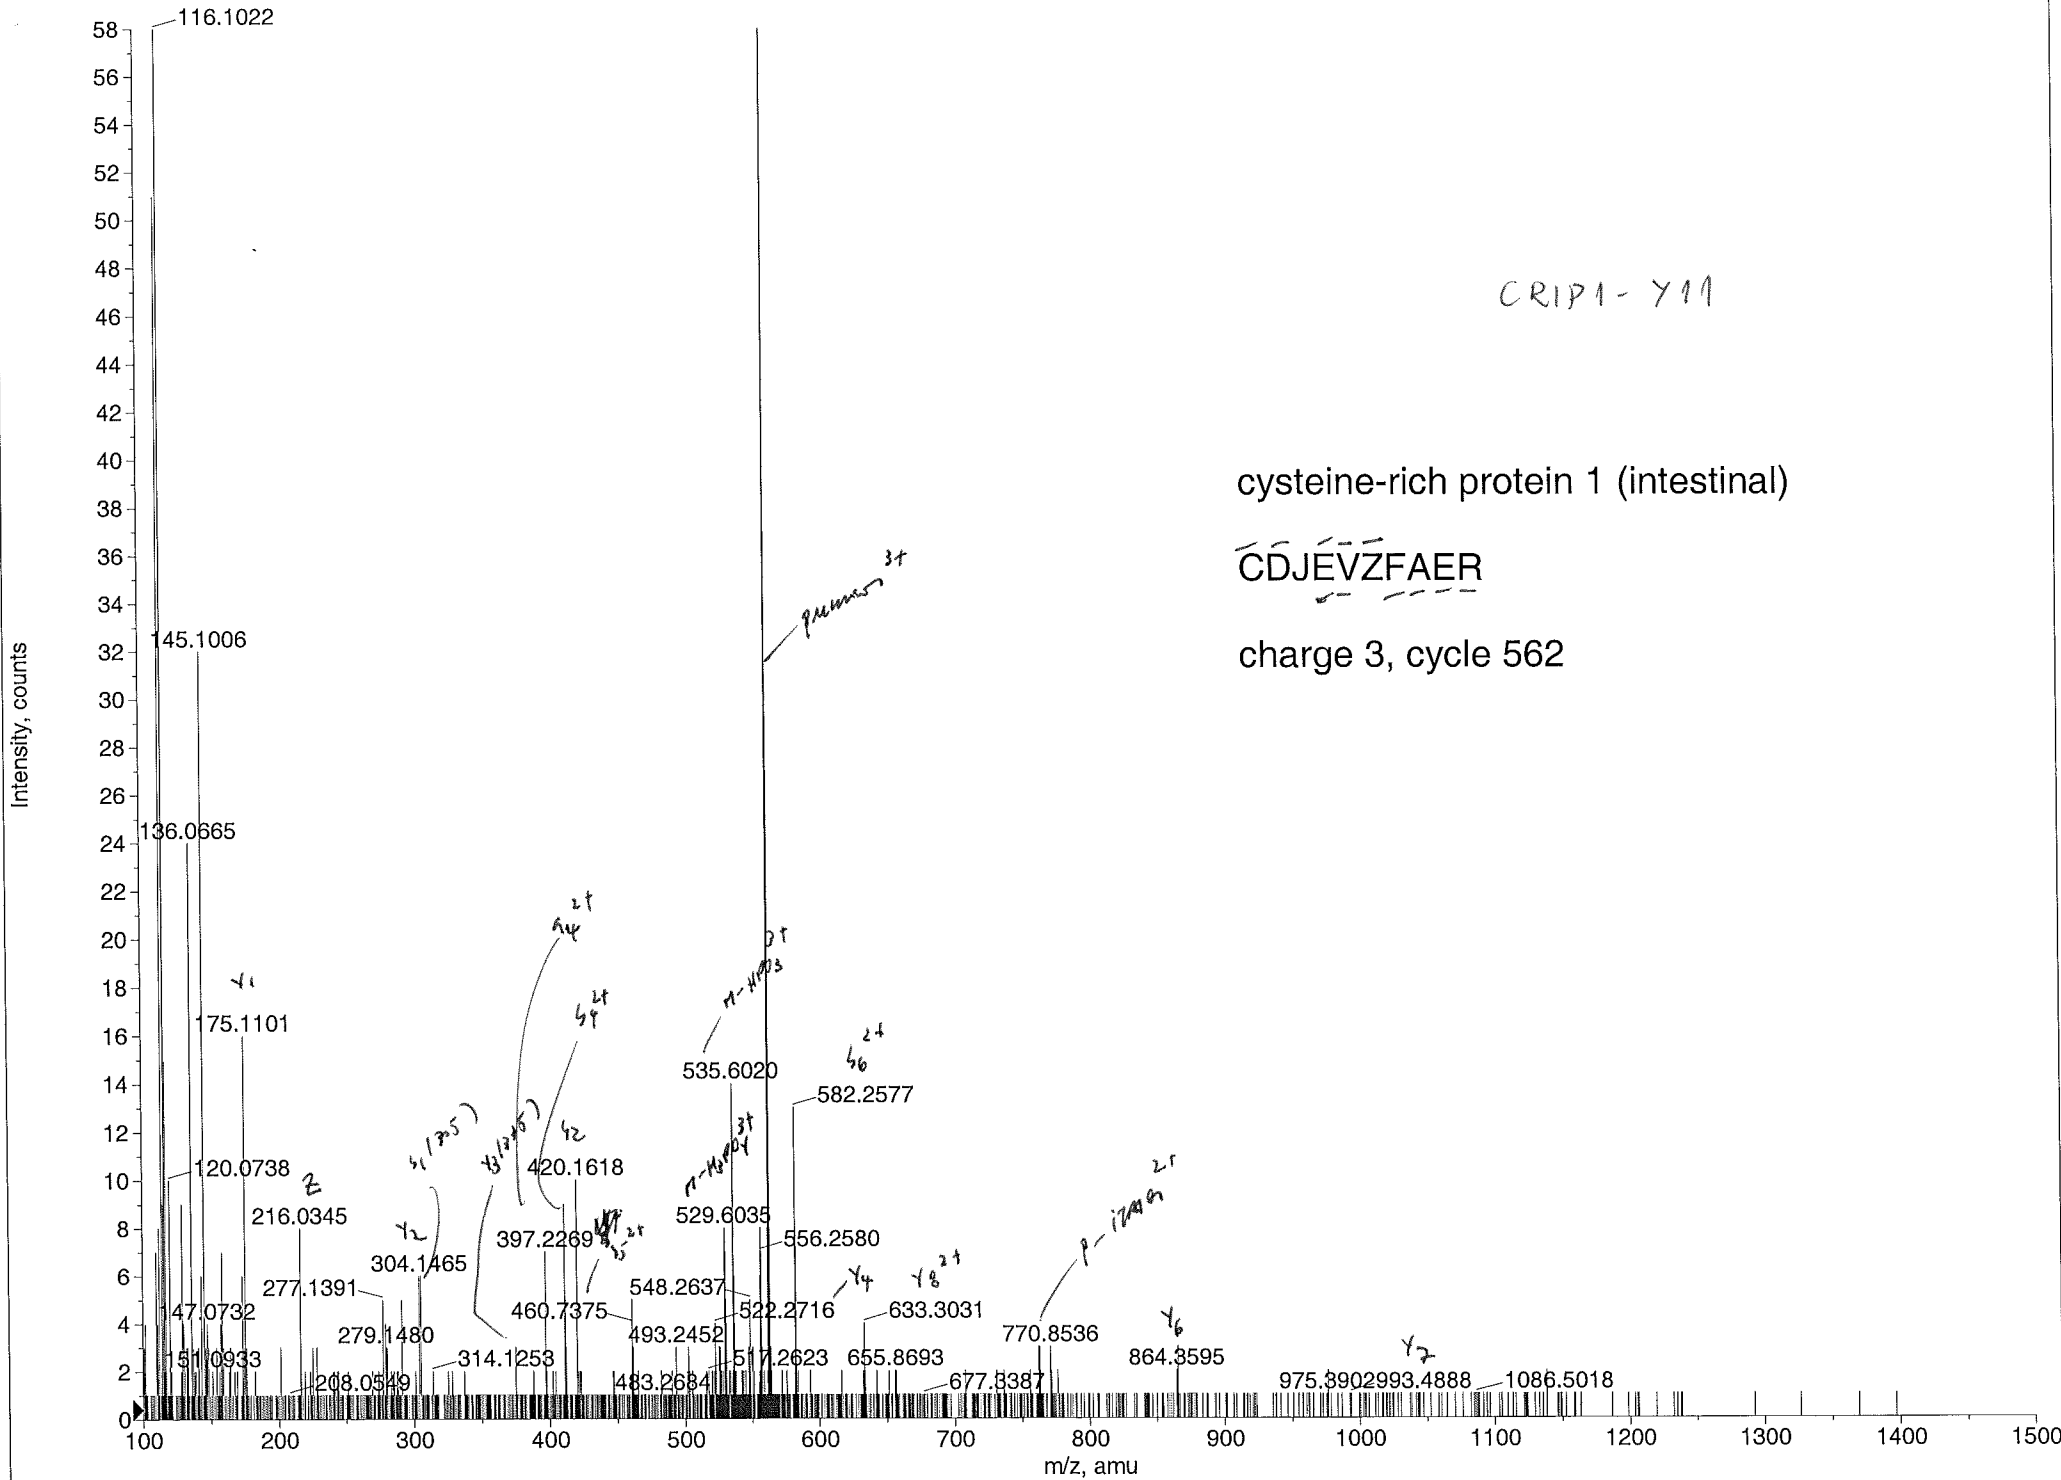

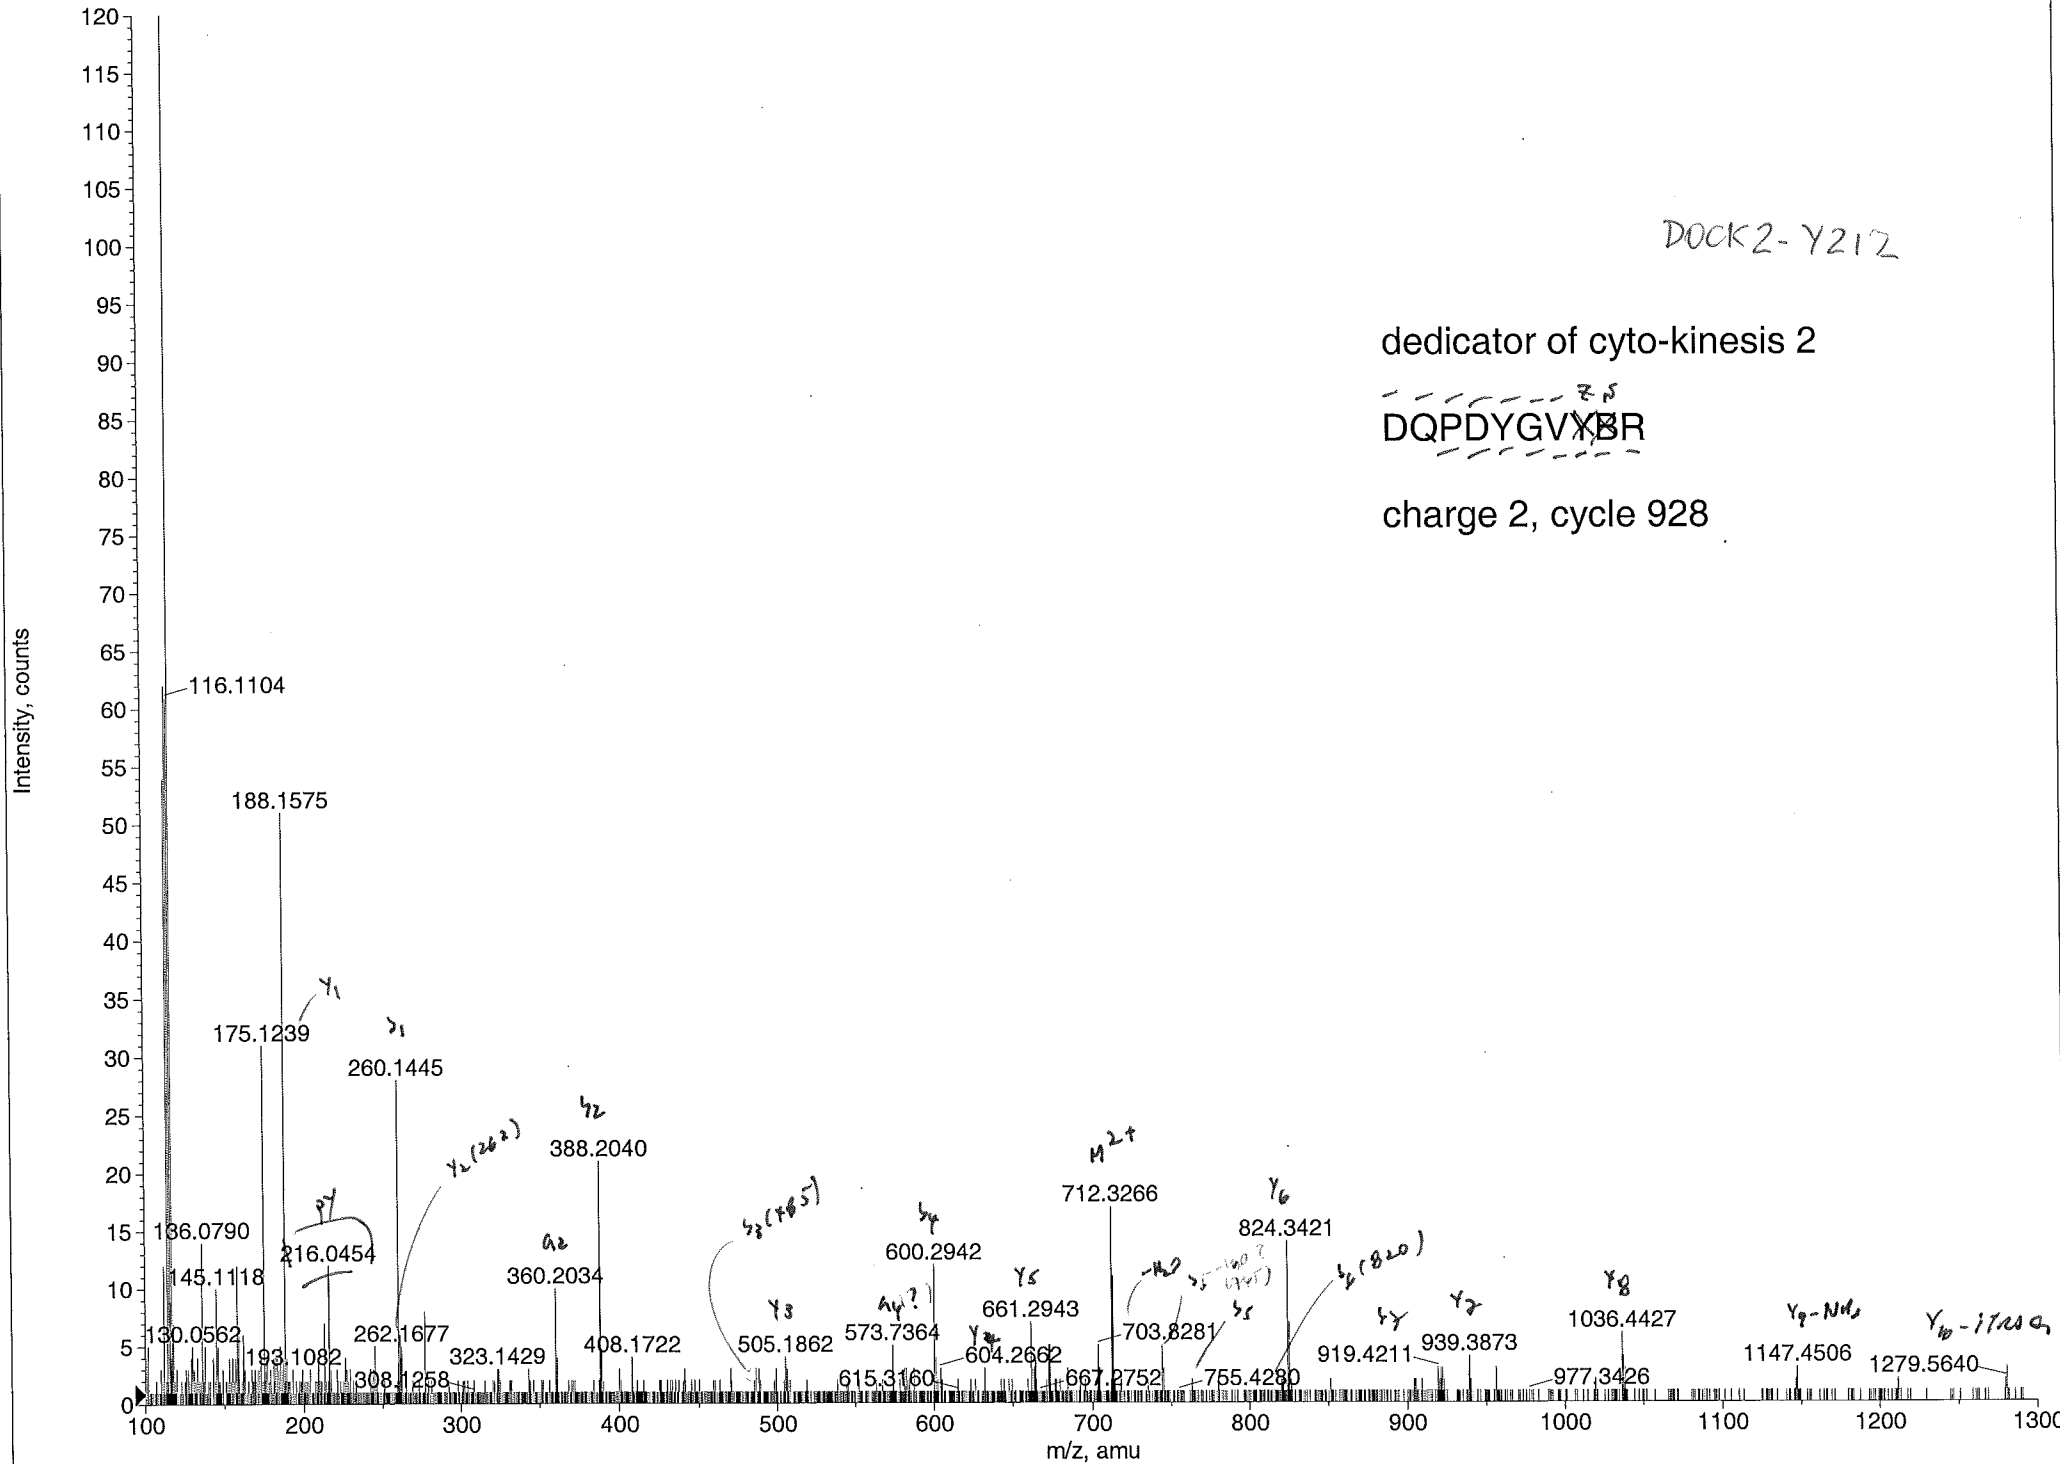

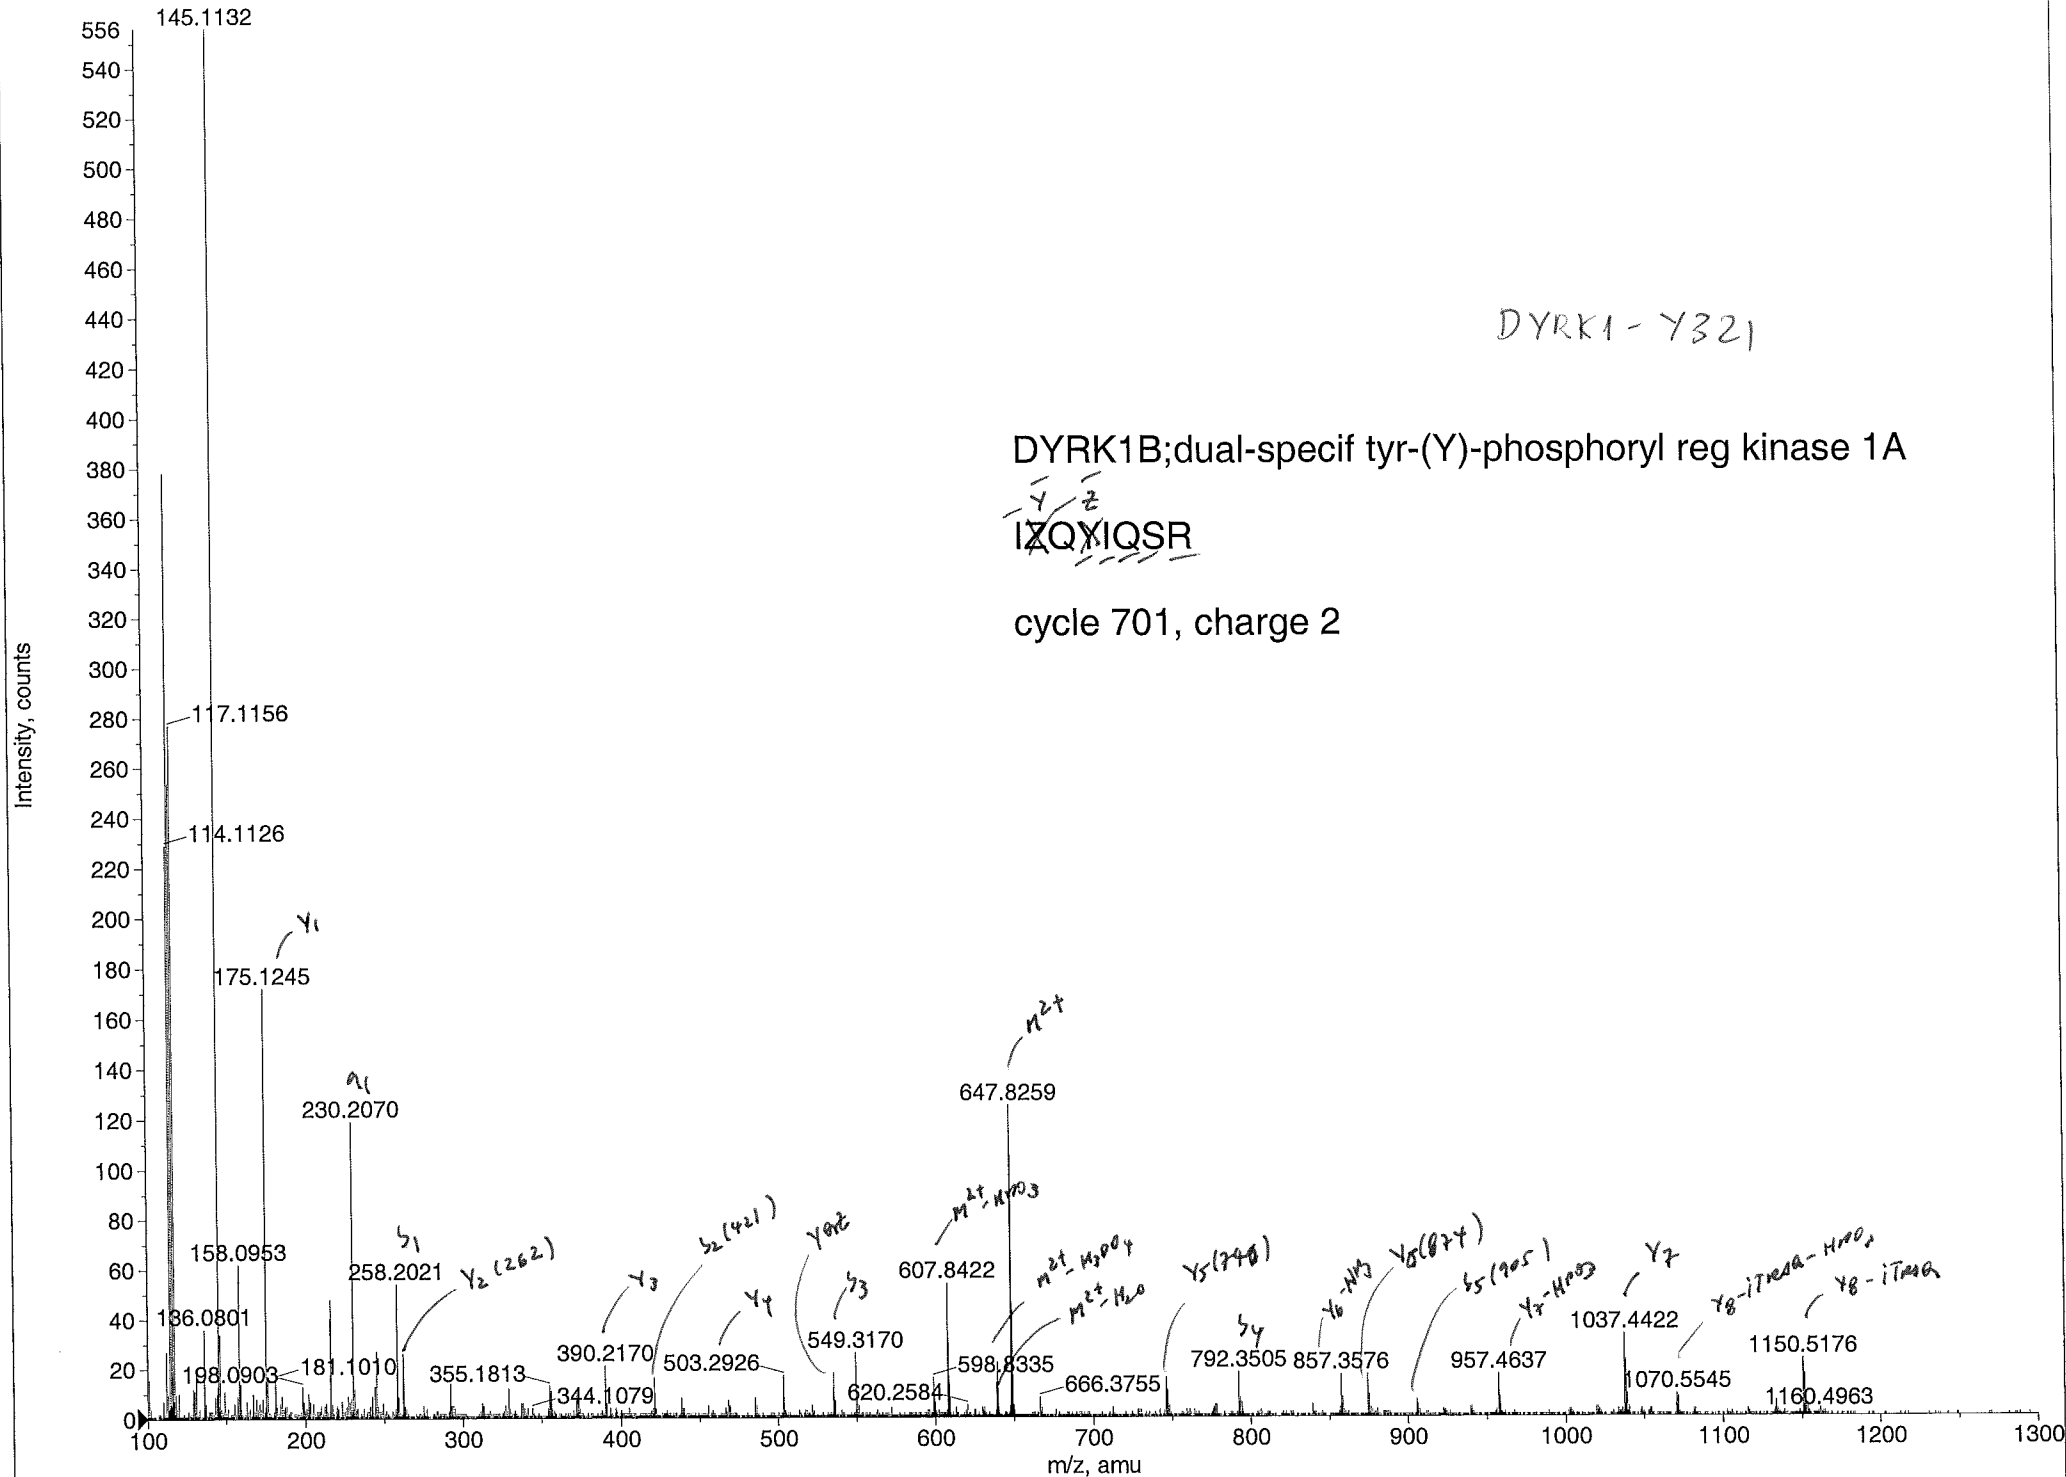



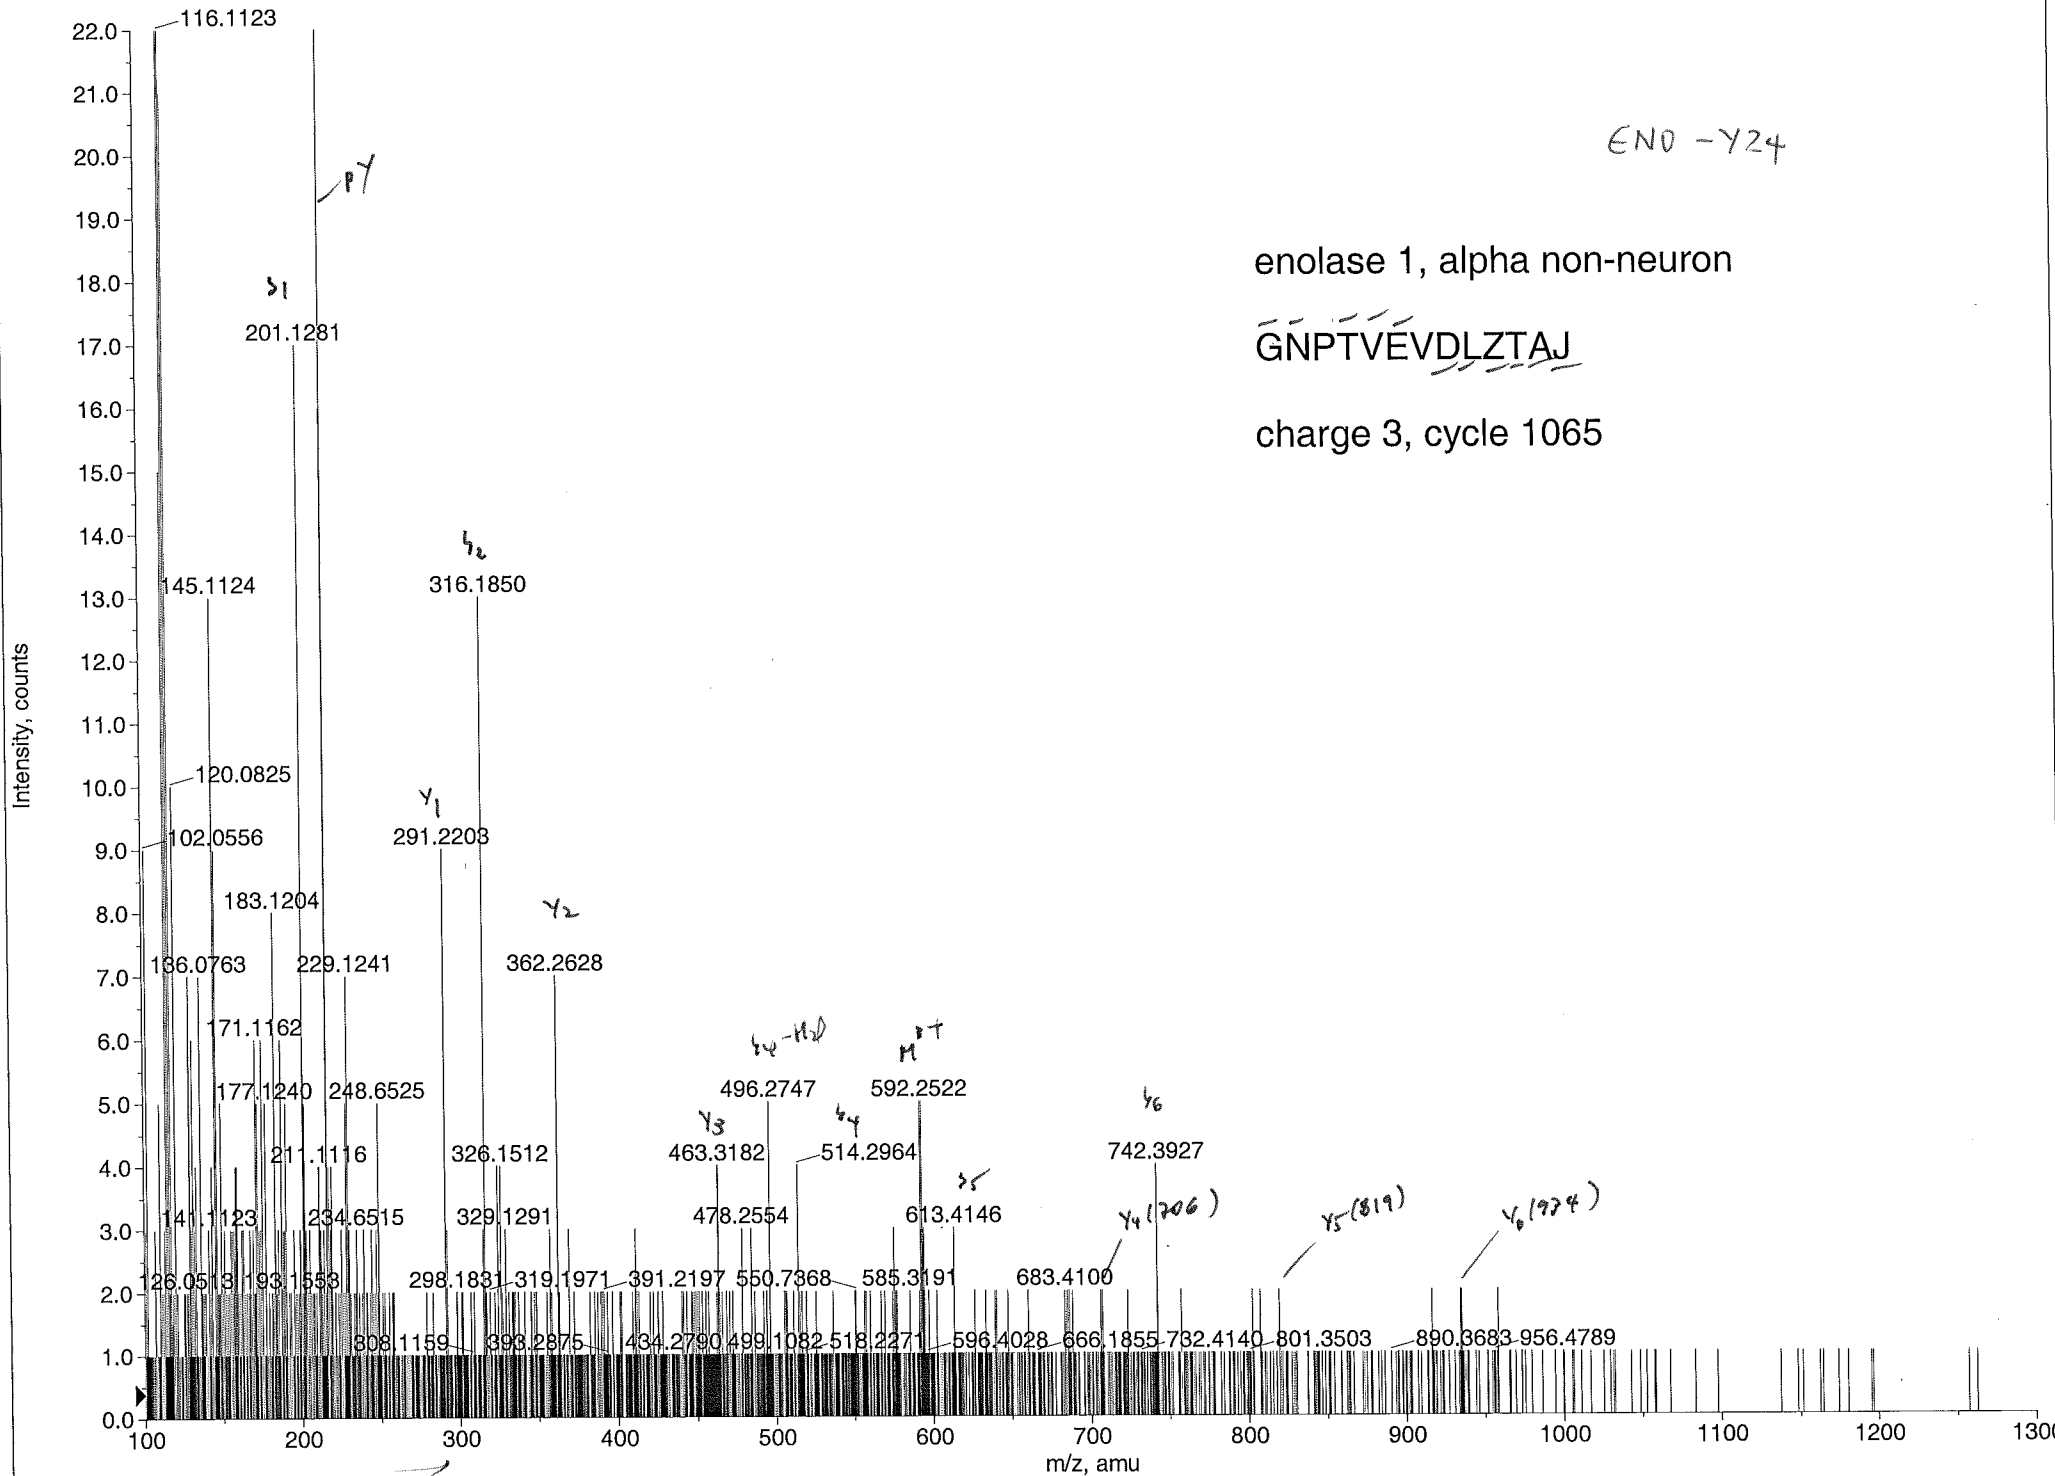

END - Y24

enolase 1, alpha non-neuron

GNPTVEVDLZTAJ

charge 3, cycle 1065

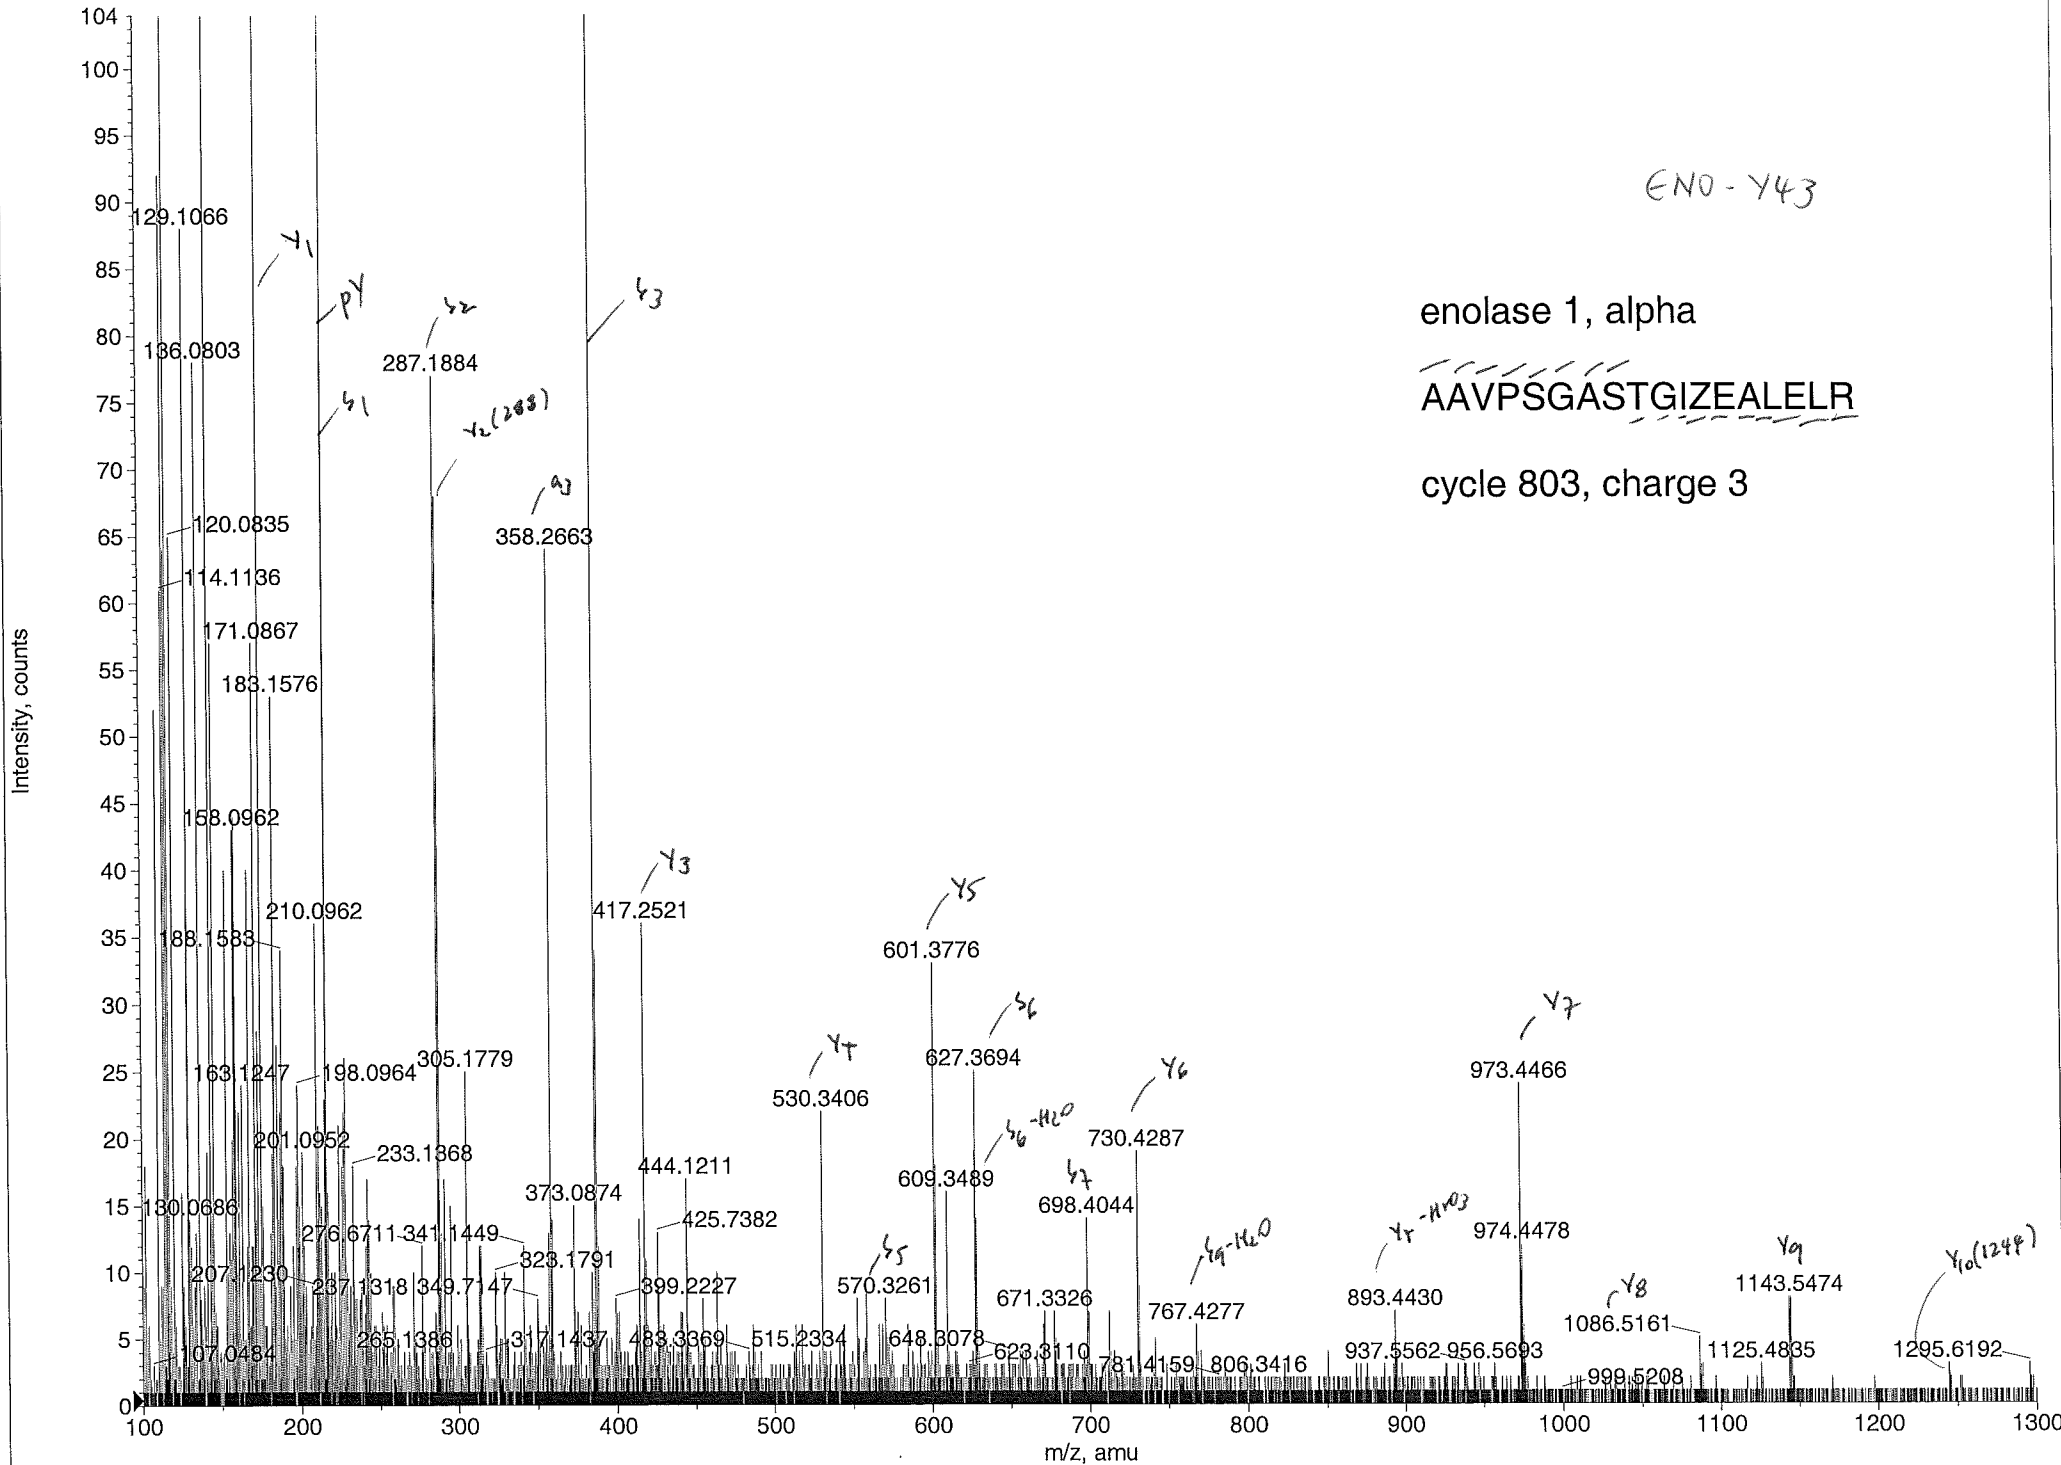

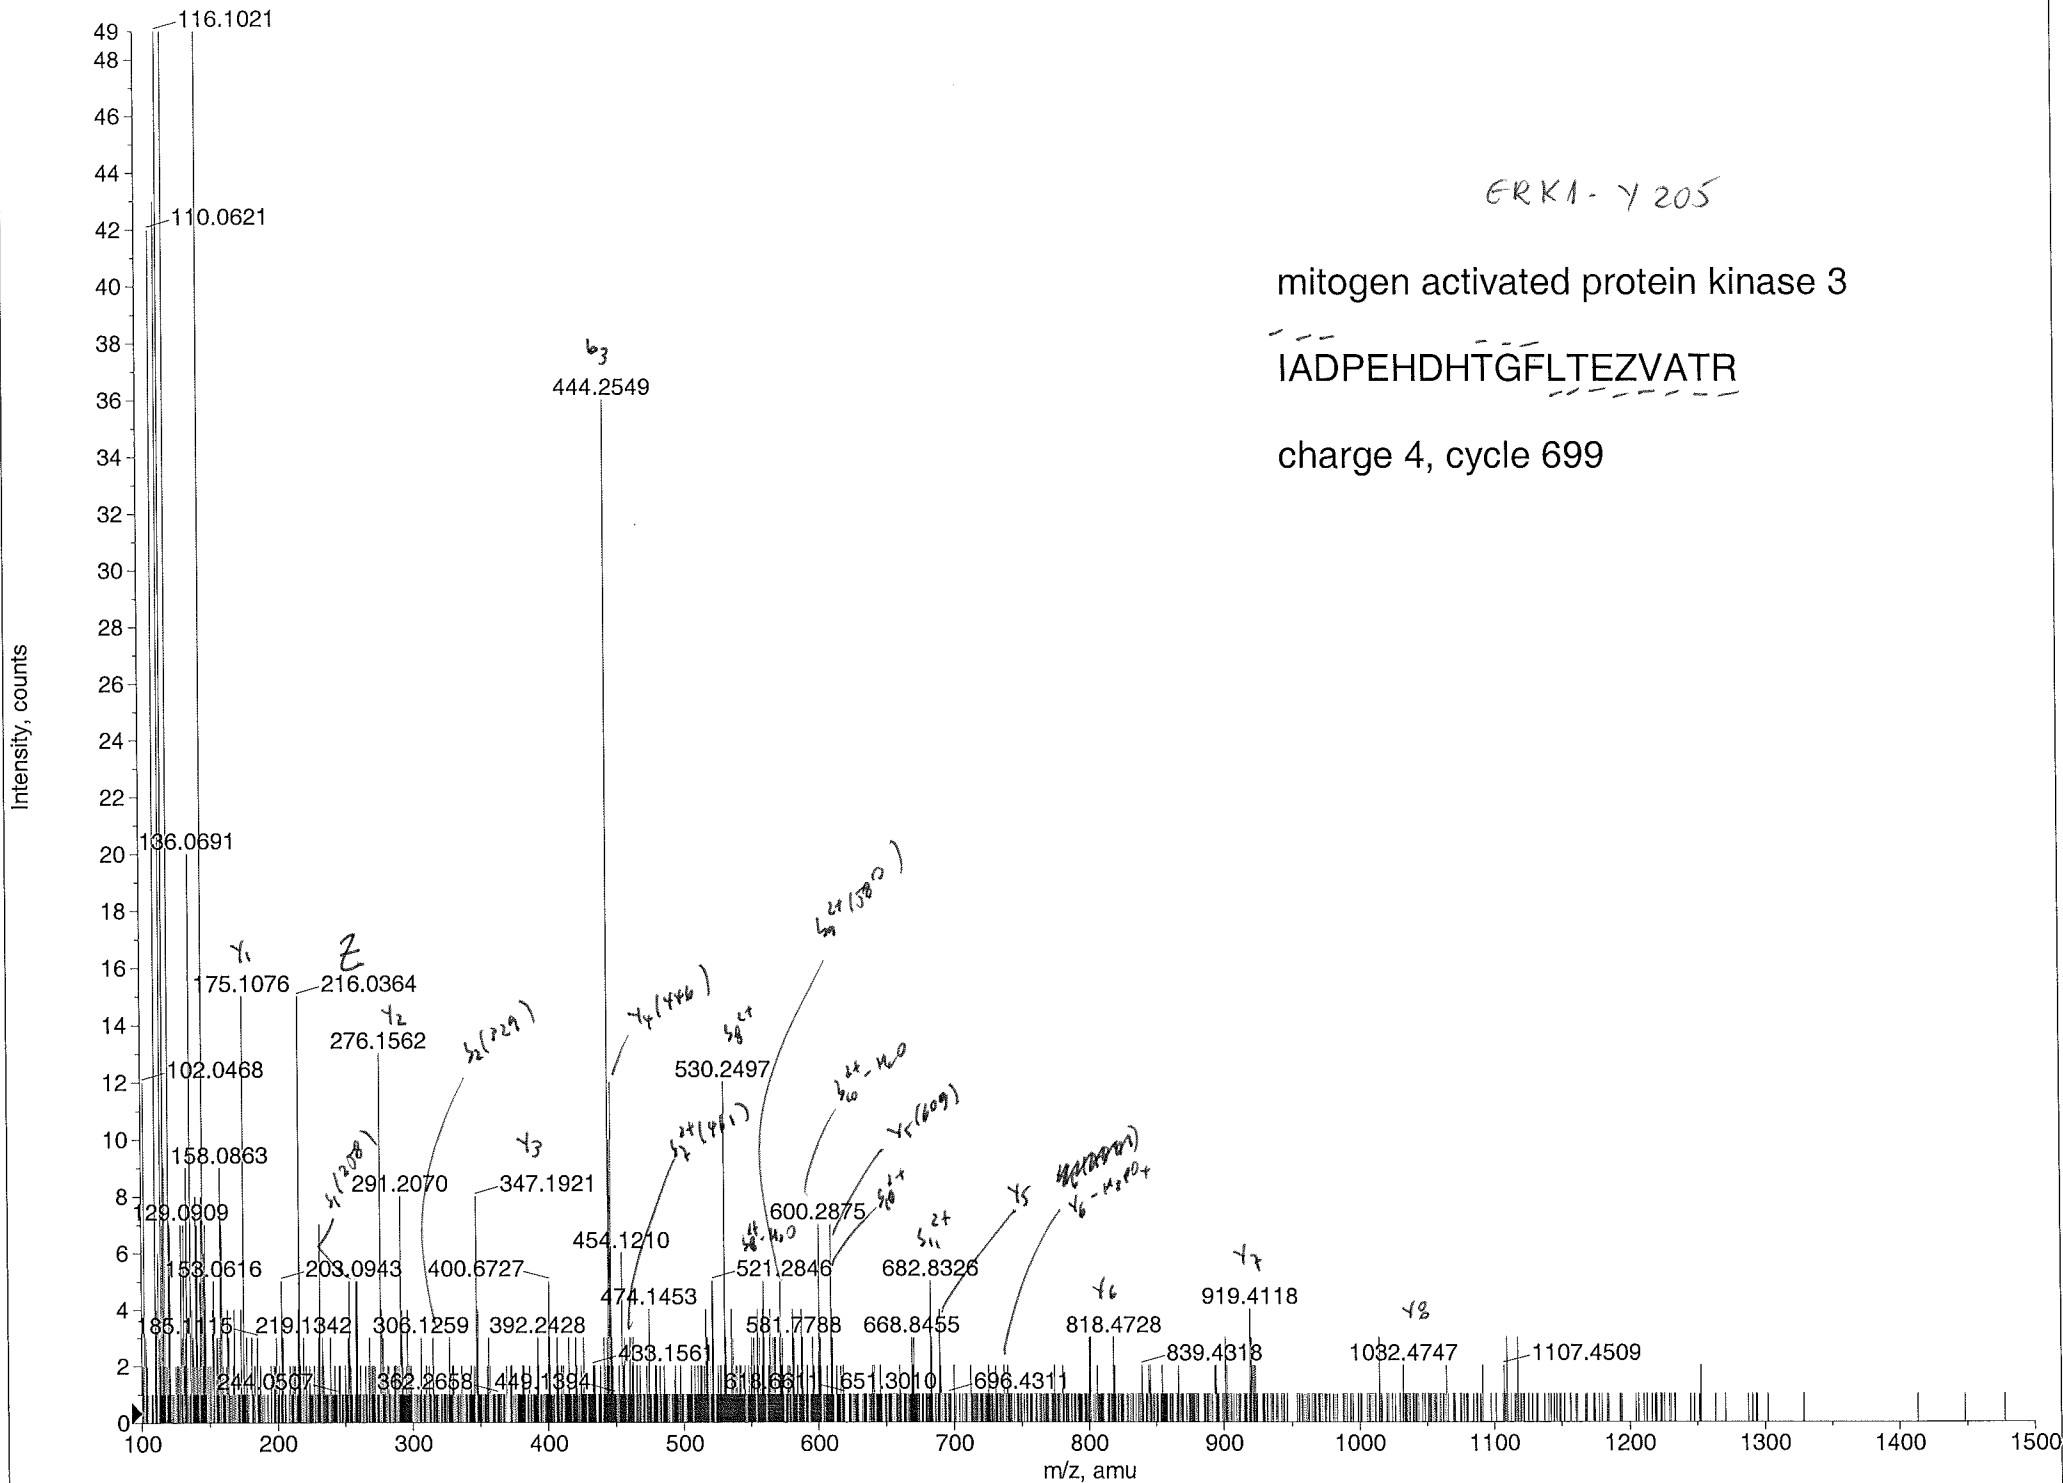

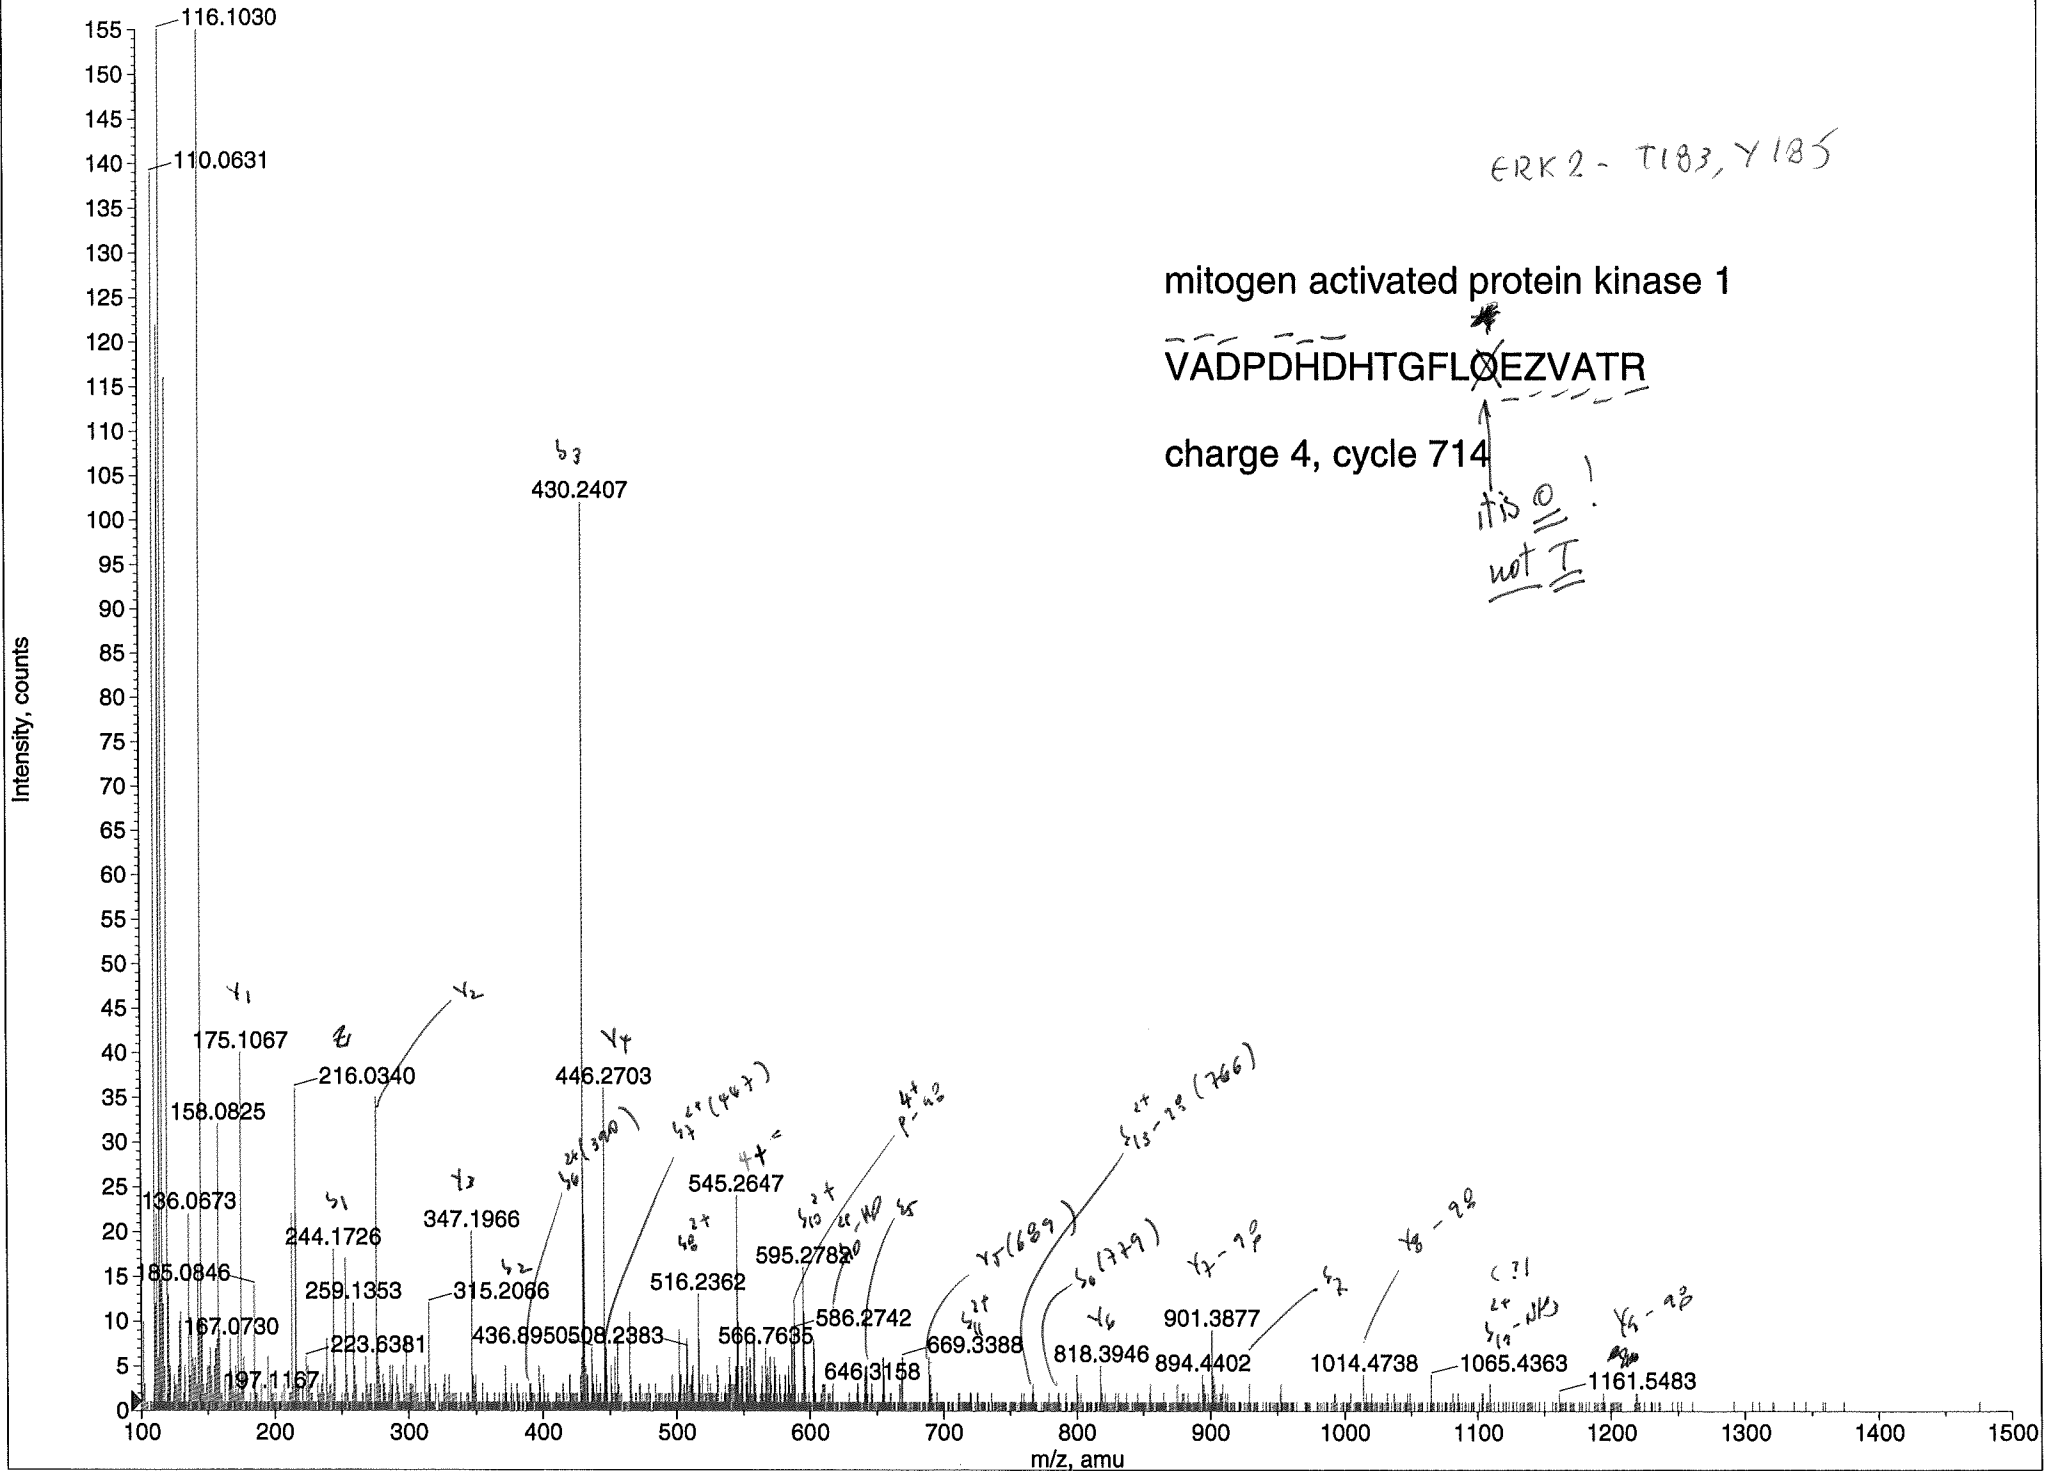

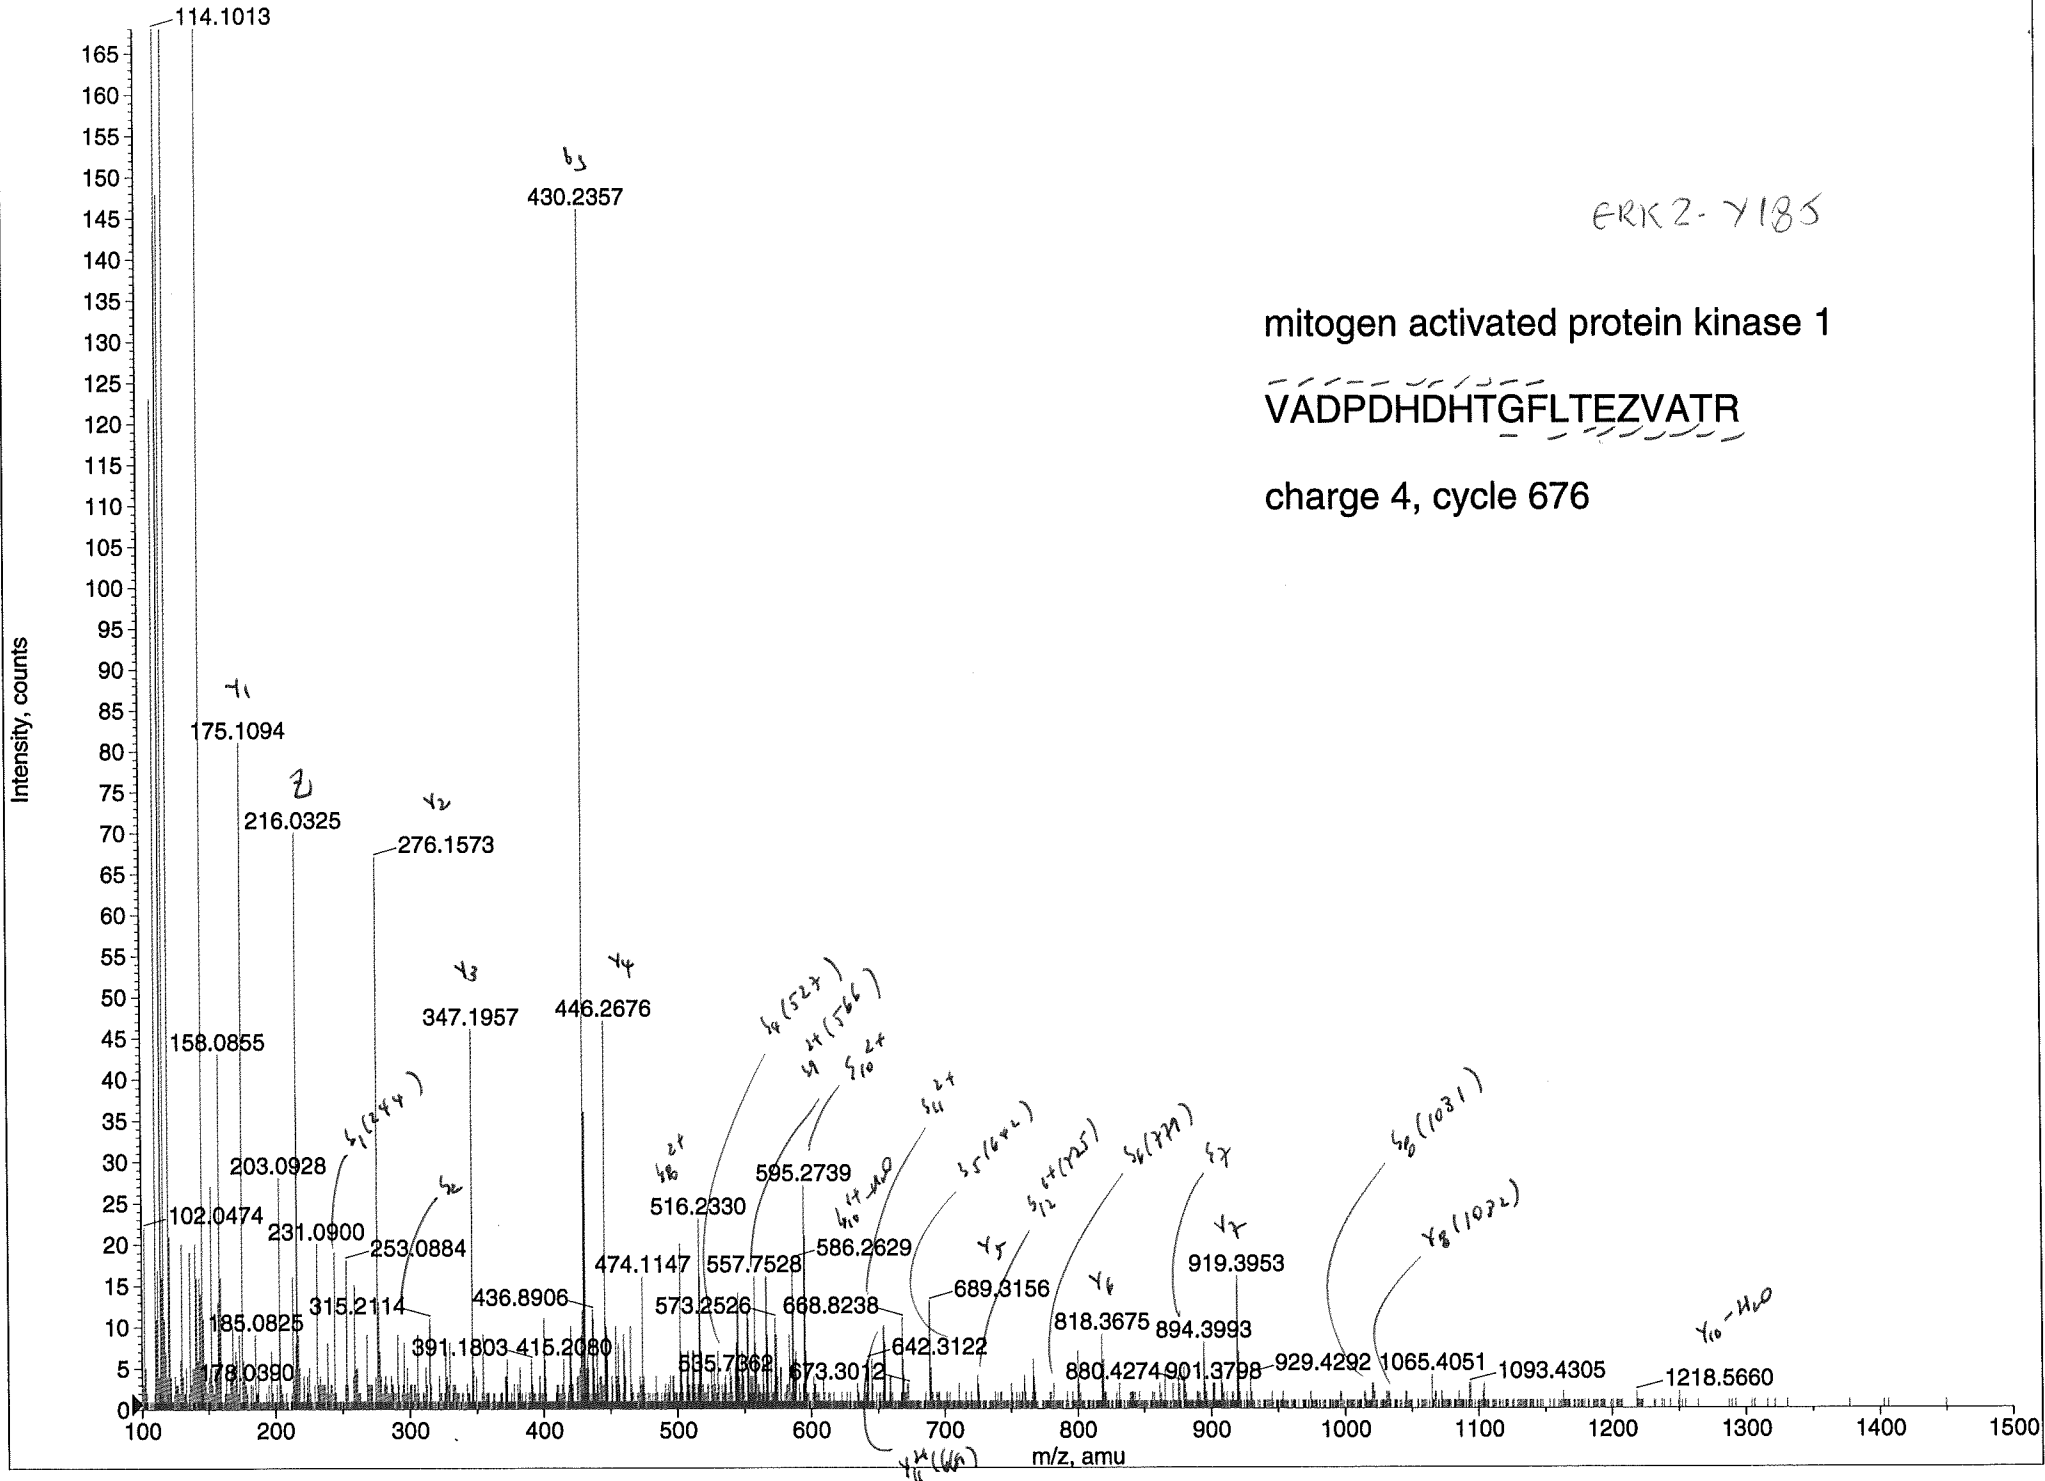

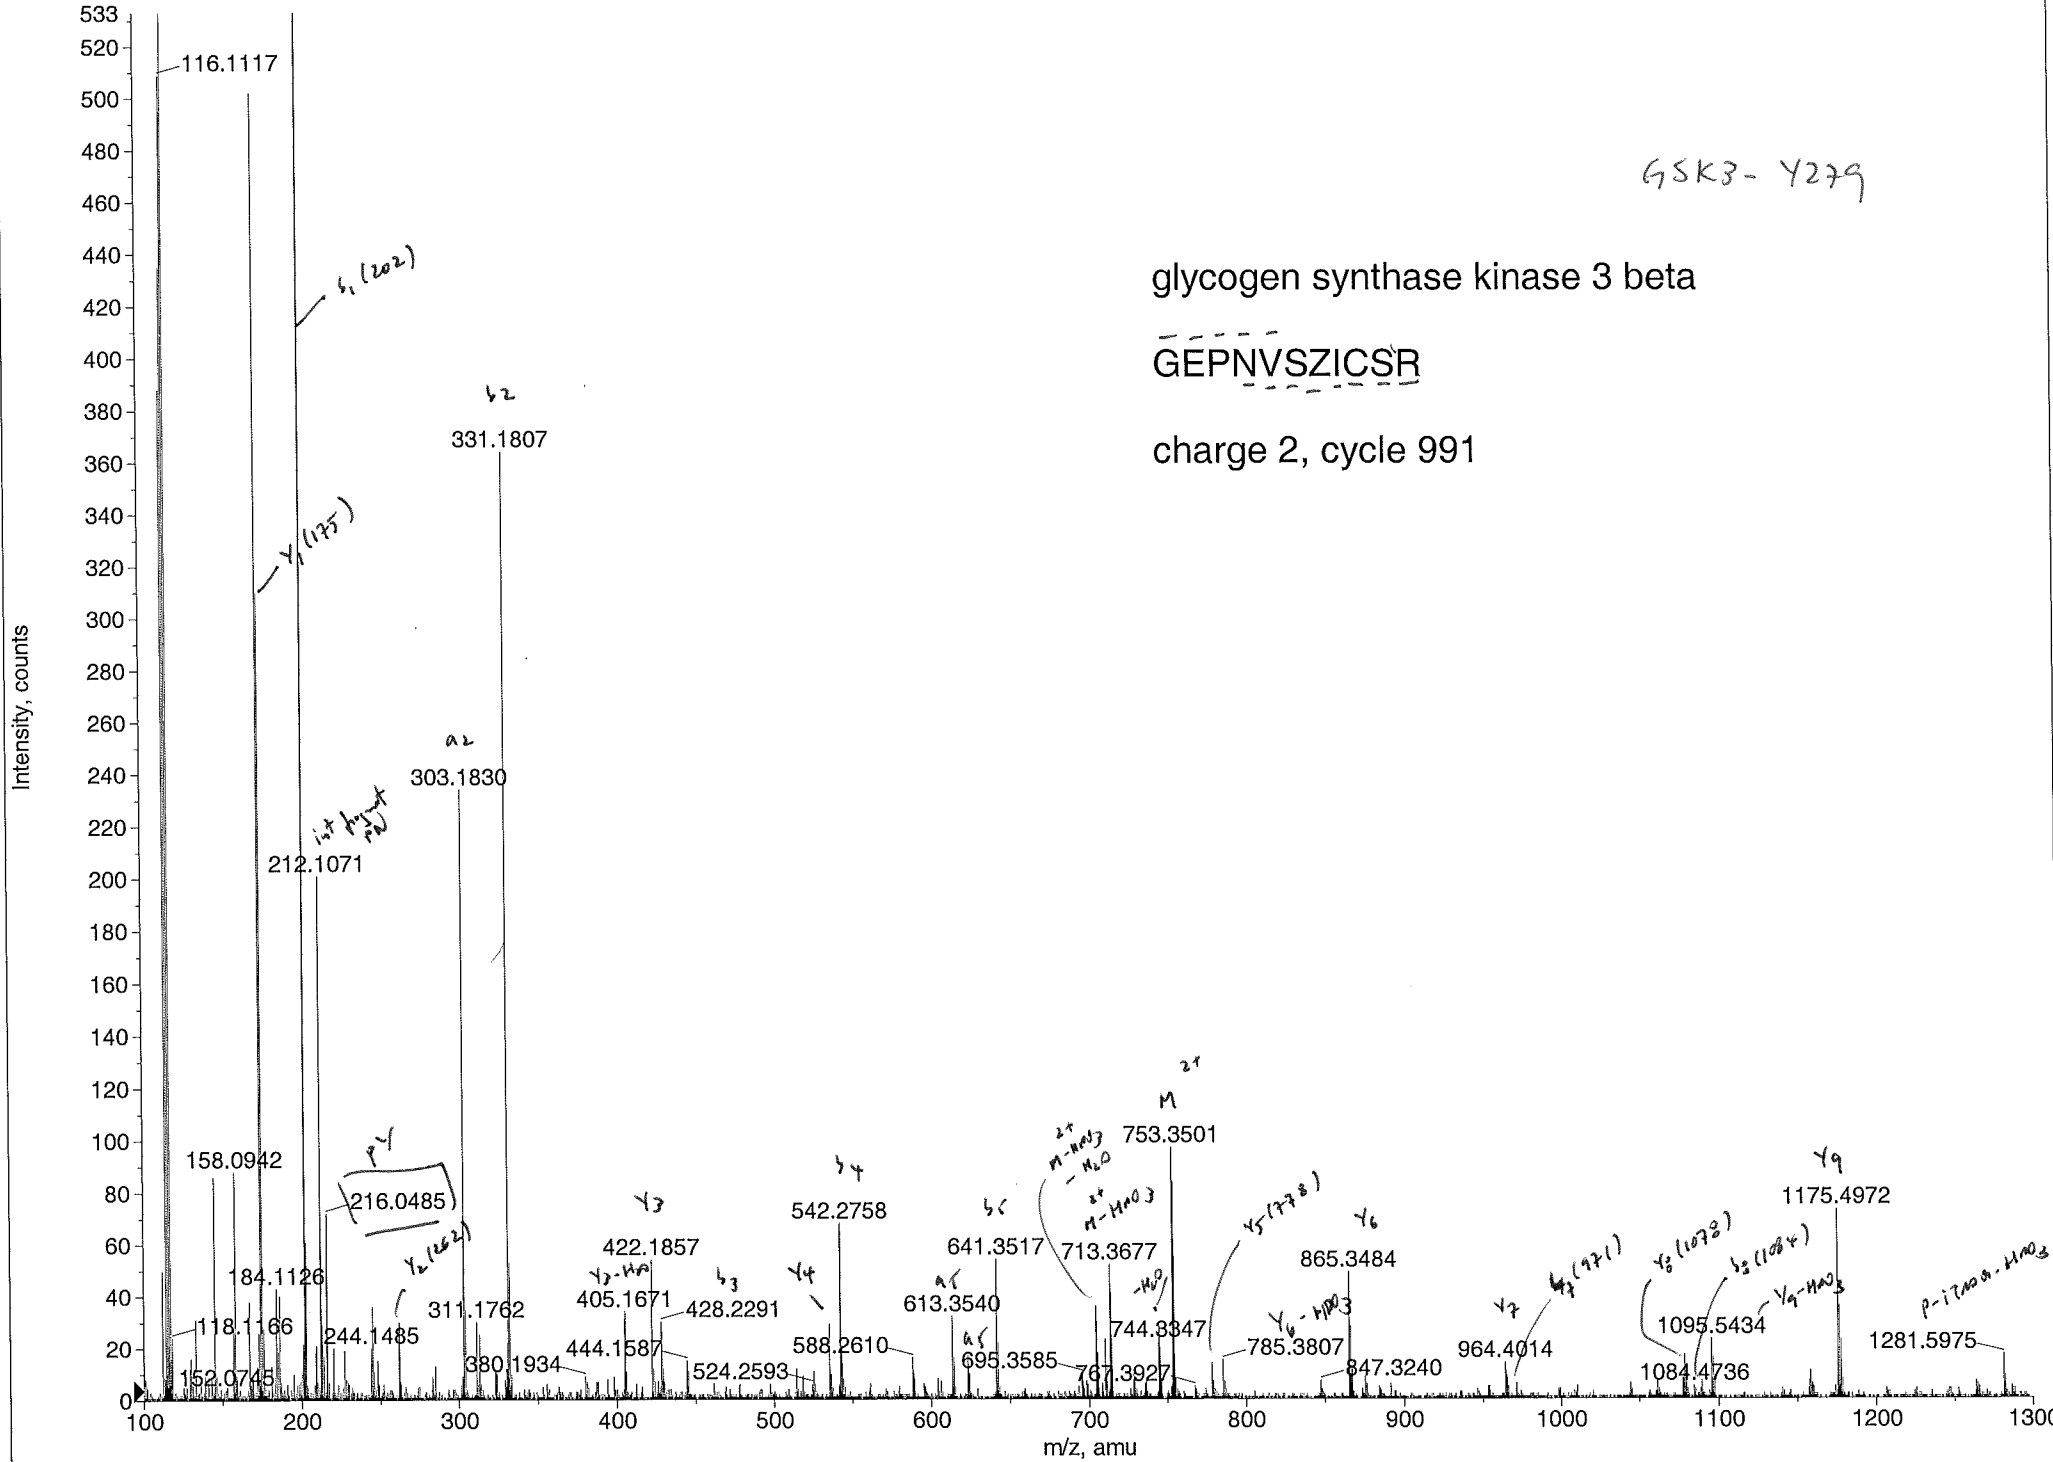

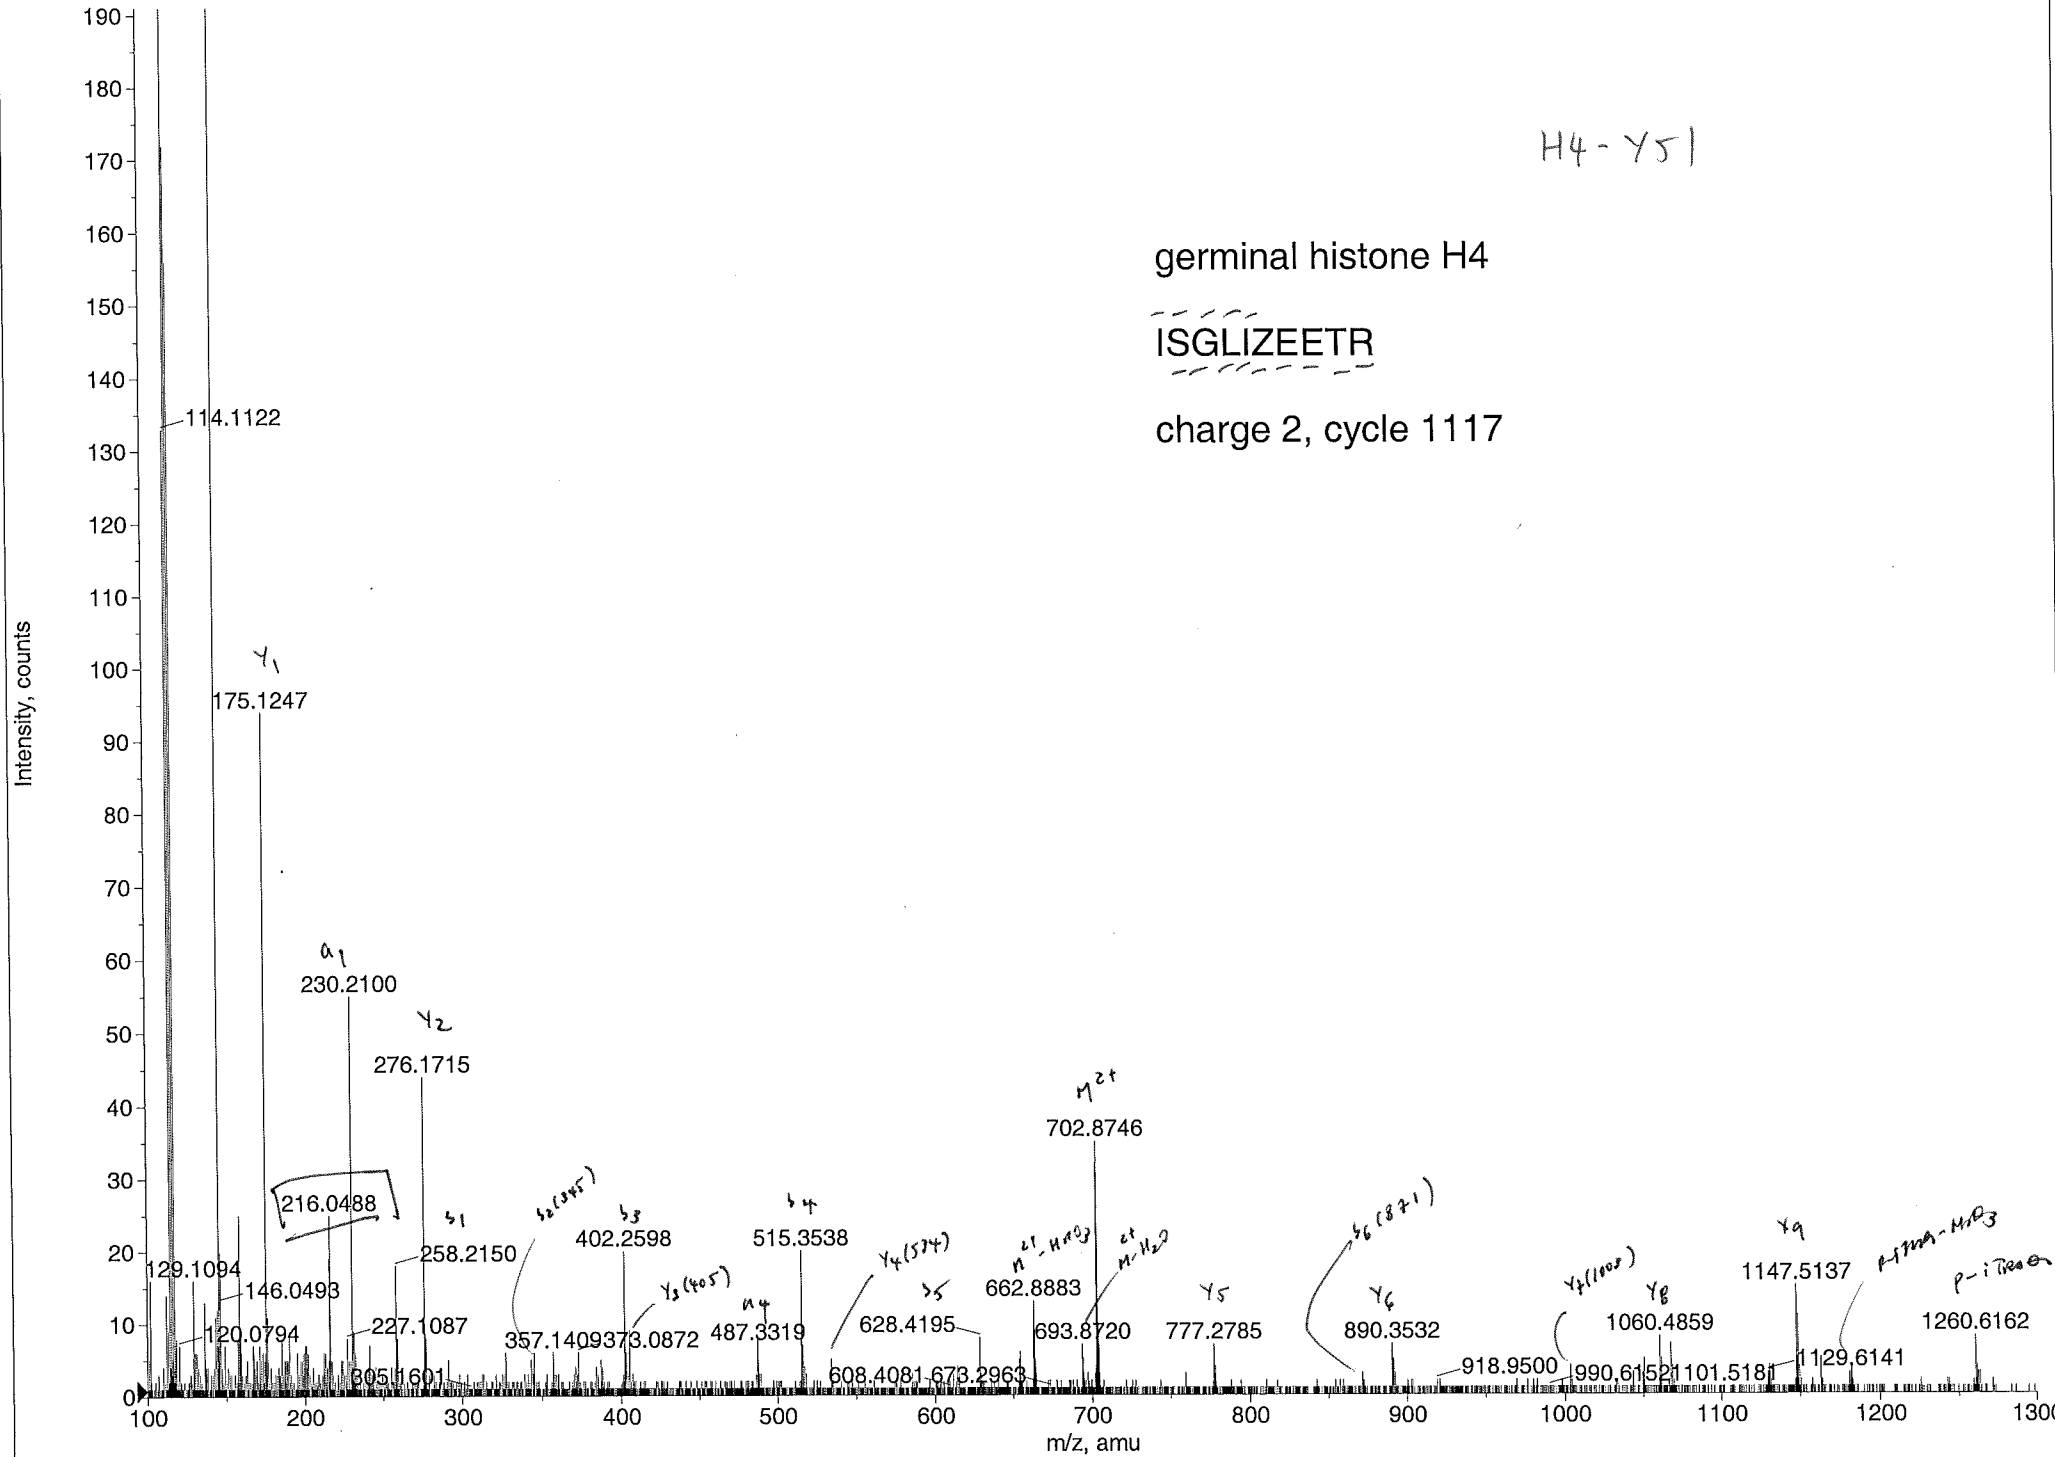

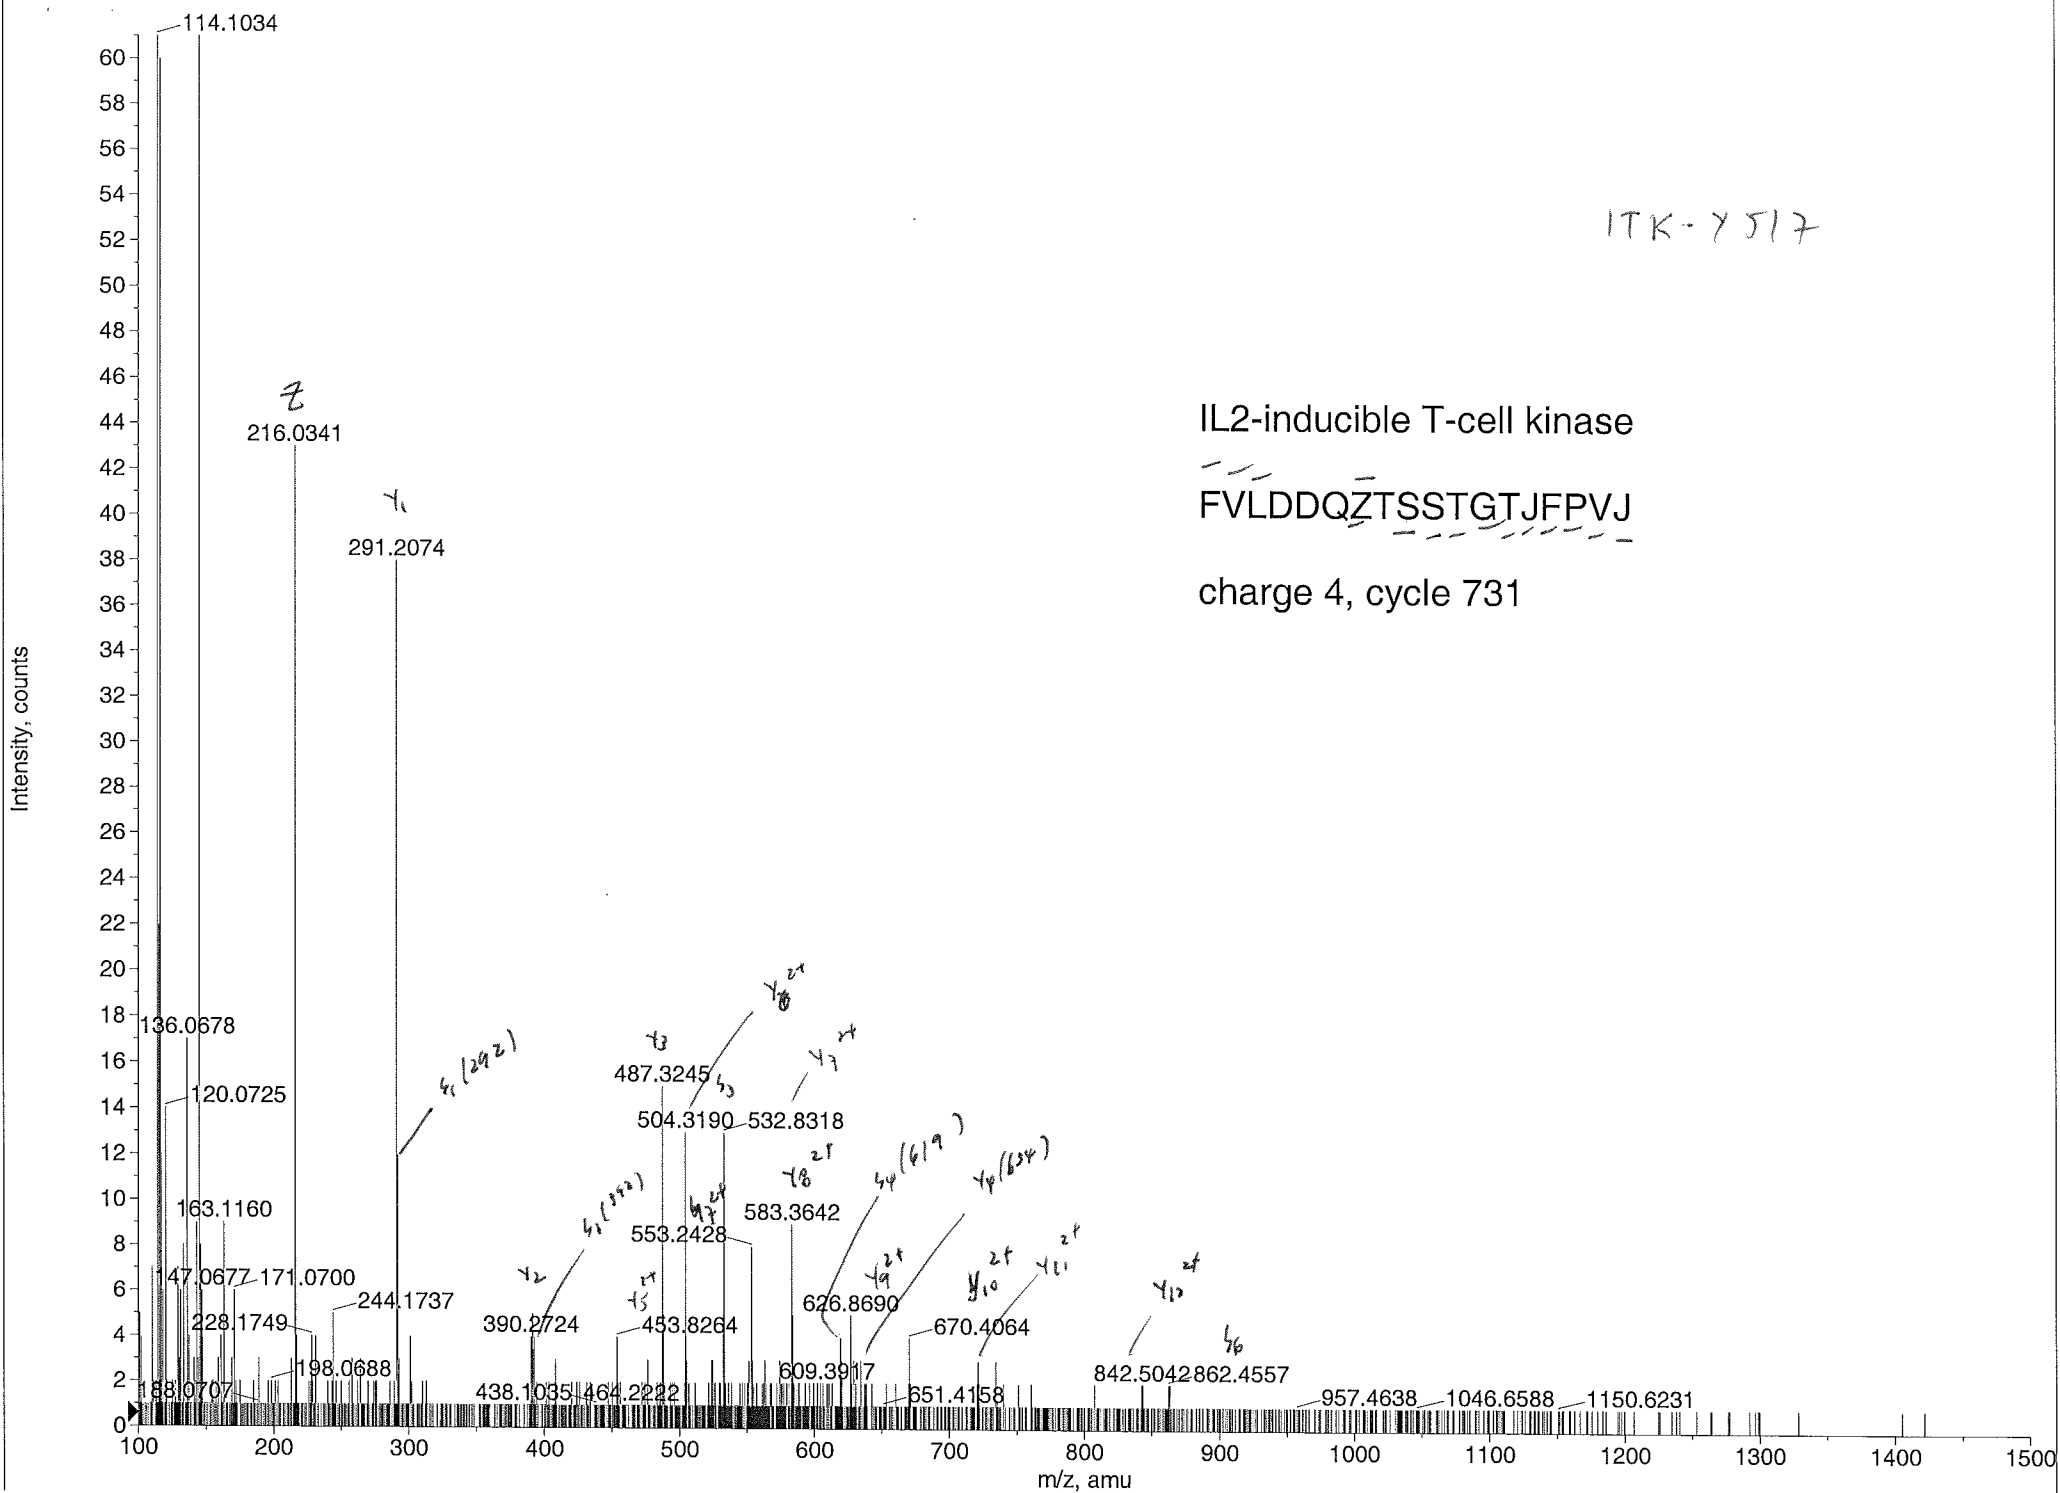

ITK-7517

IL2-inducible T-cell kinase  
FVLDDQZTSSTGTJFPVJ  
charge 4, cycle 731



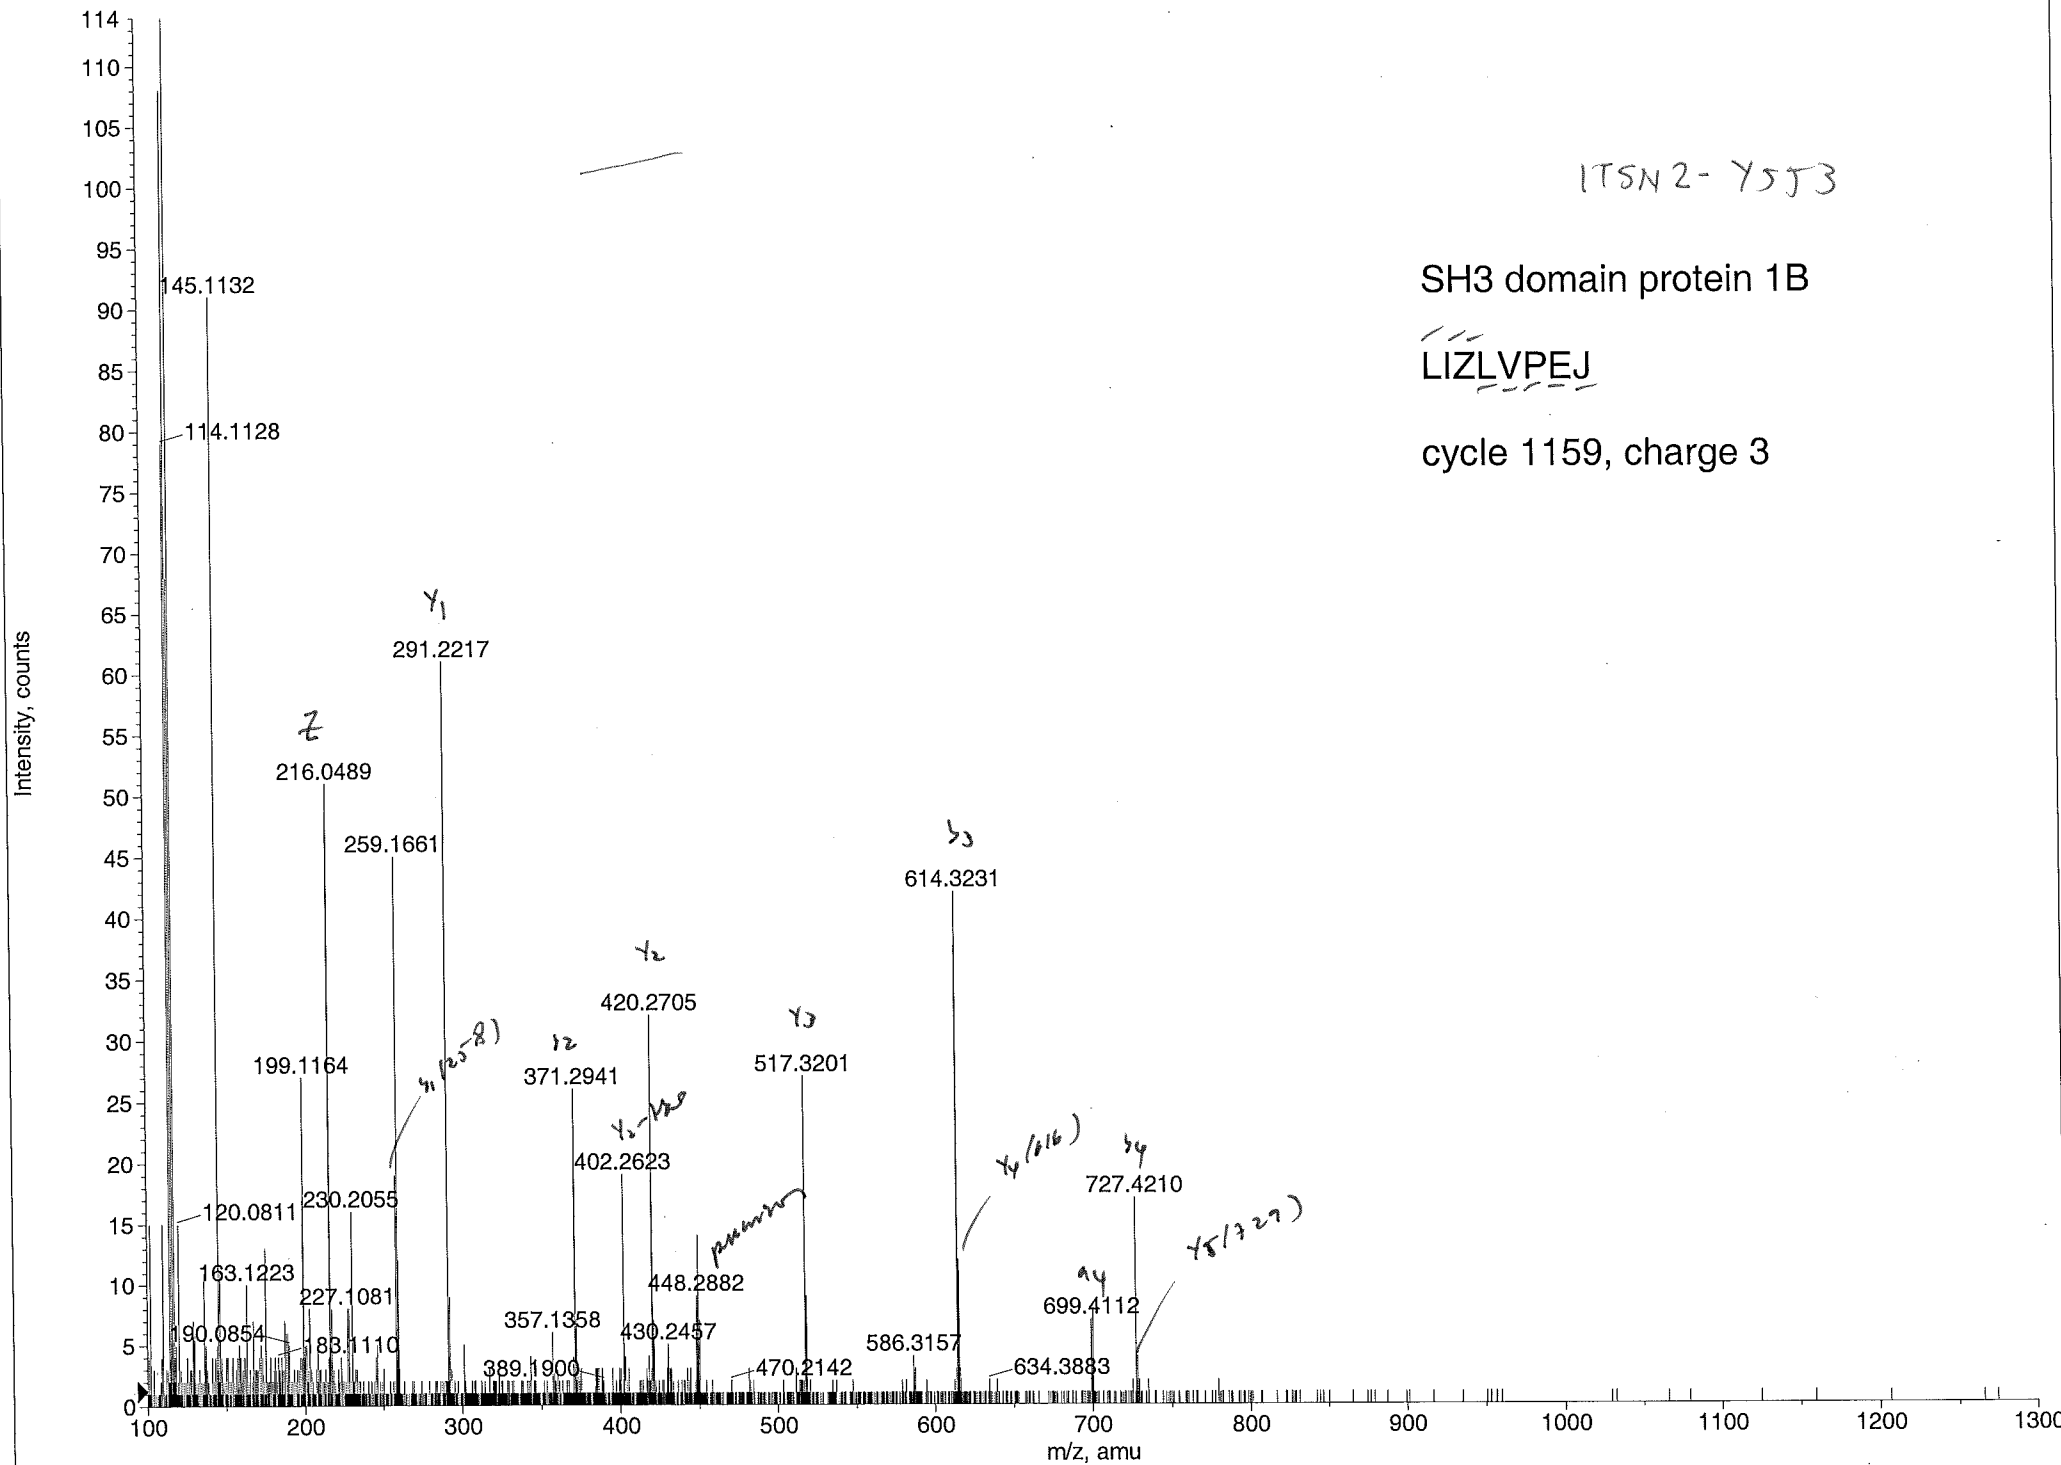

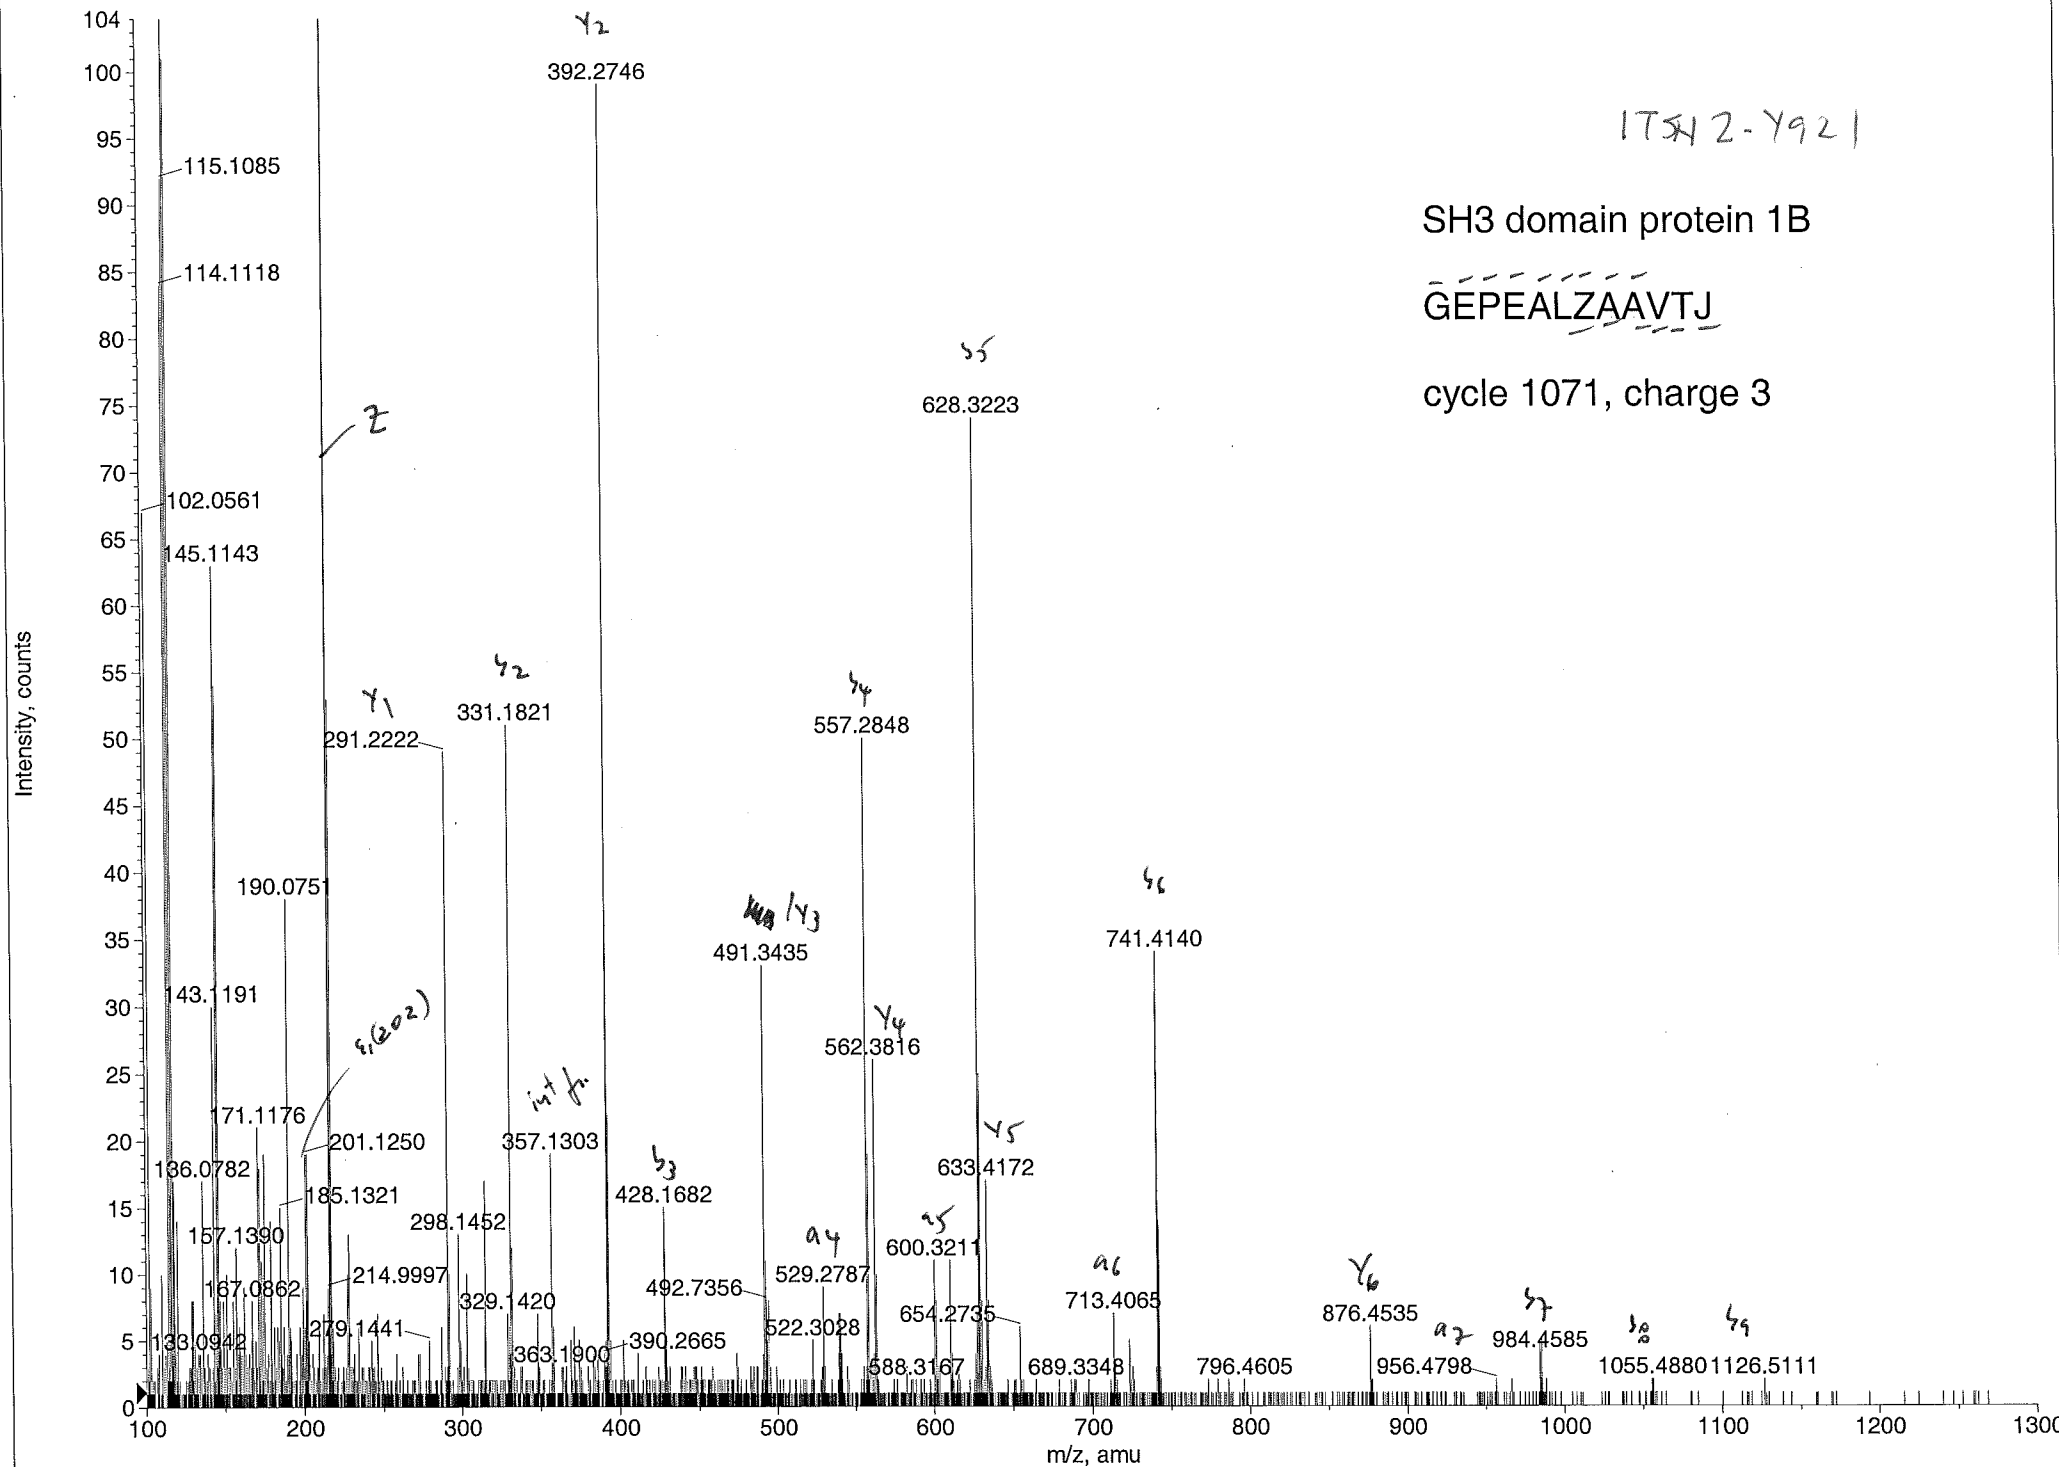

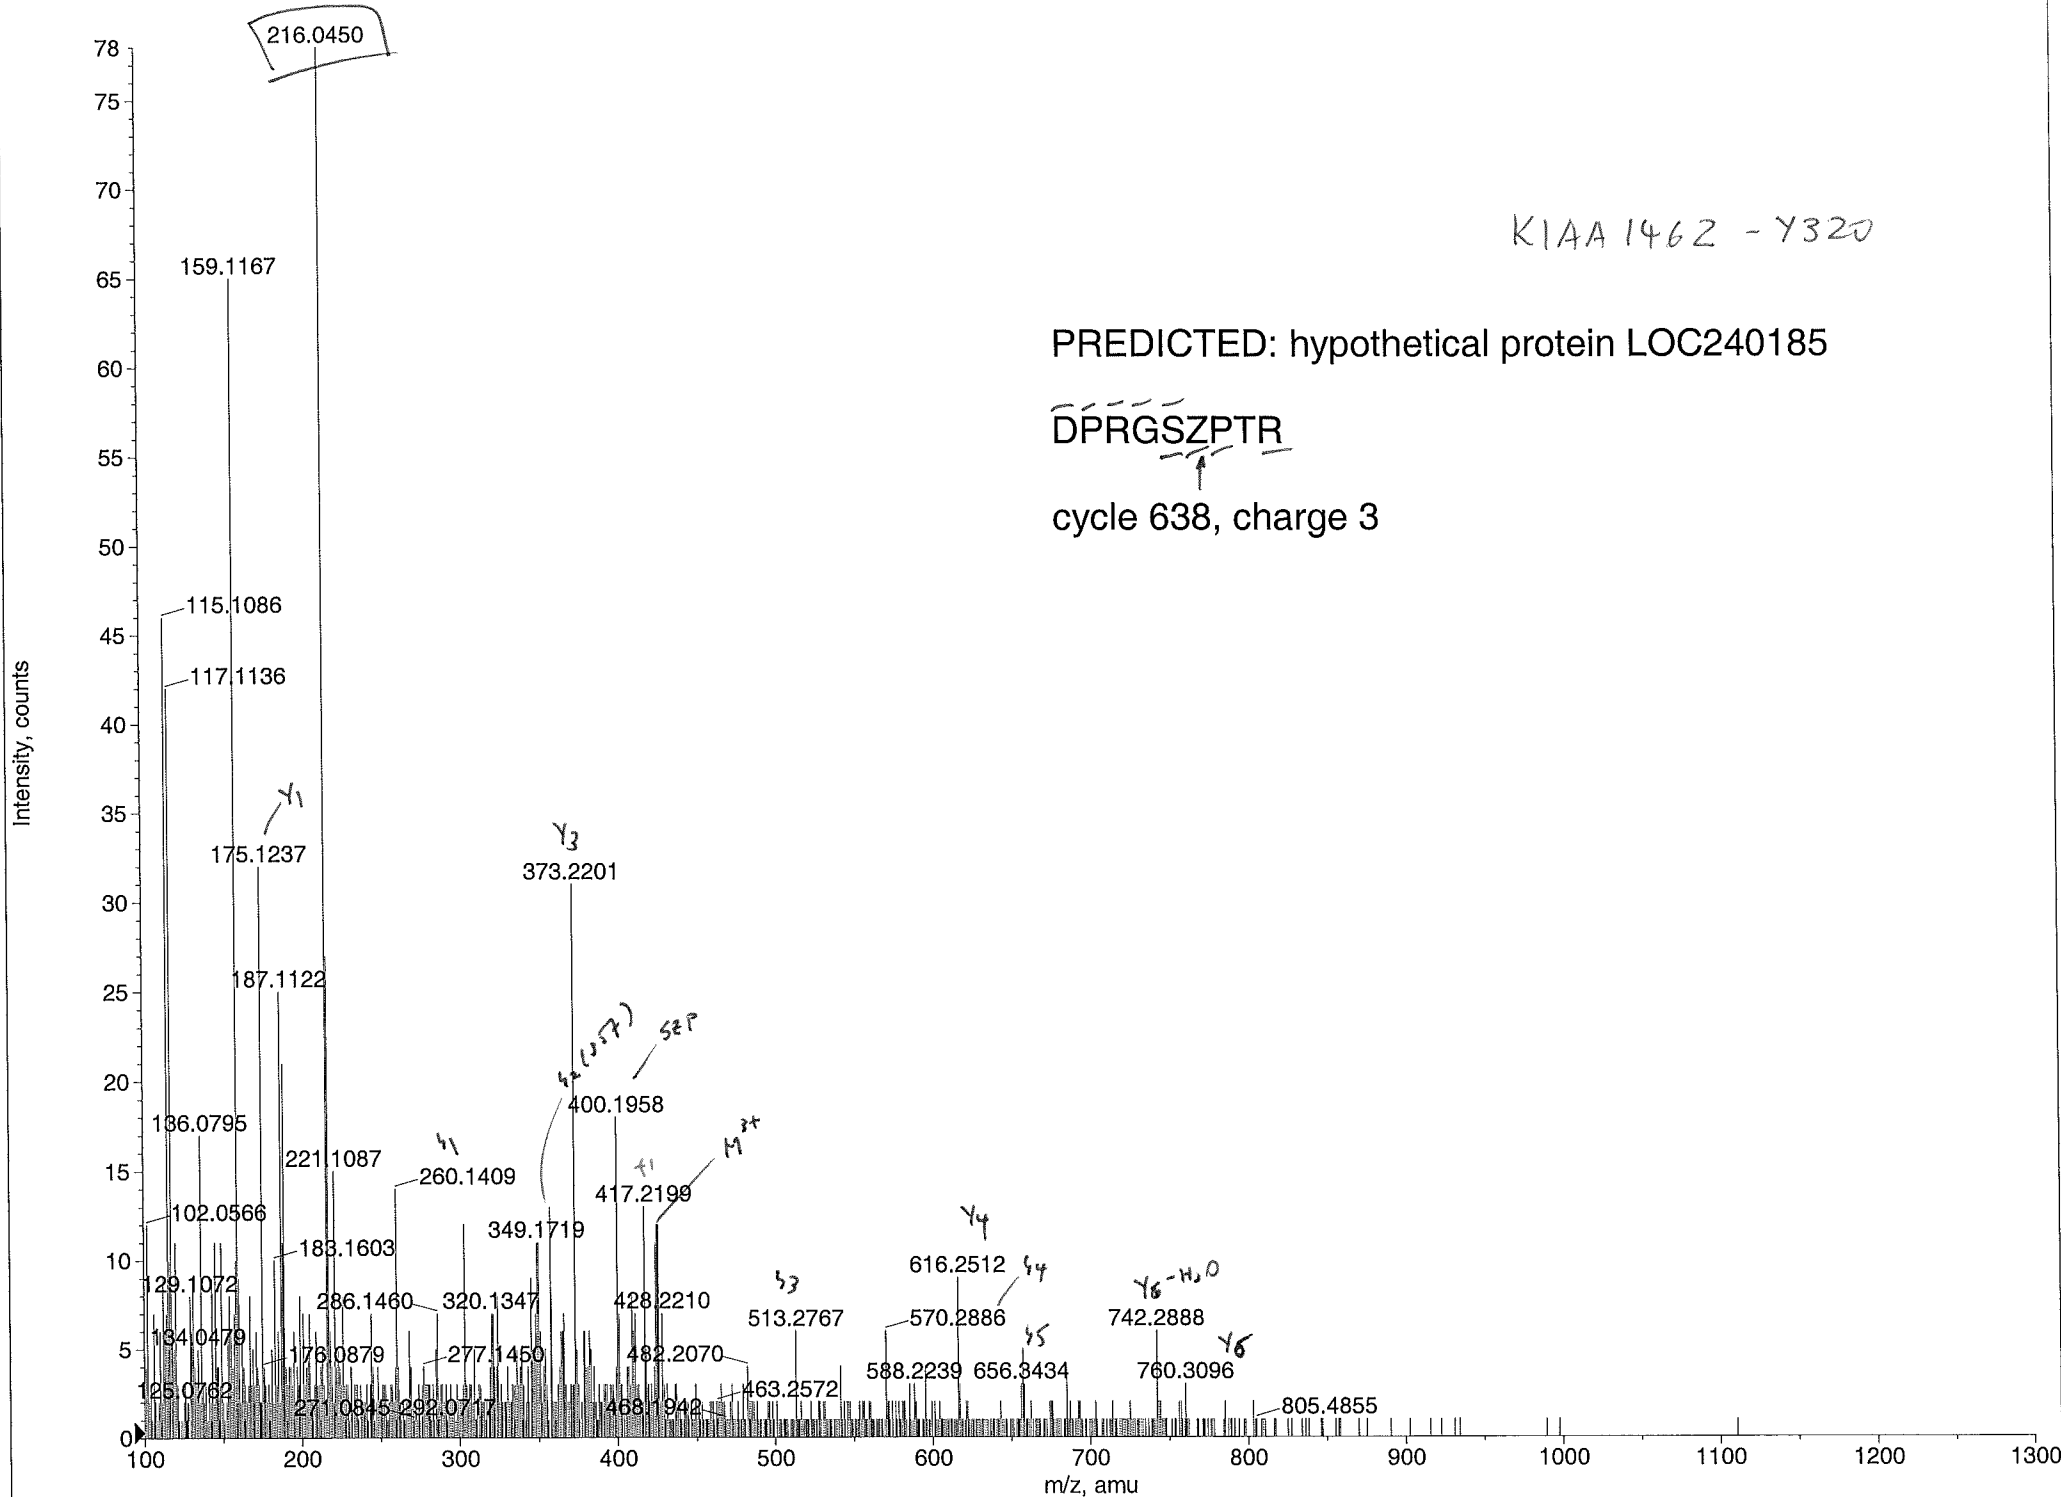



LCK-Y192

lymphocyte protein tyrosine kinase

NLDNGGFZISPR

cycle 739, charge 3

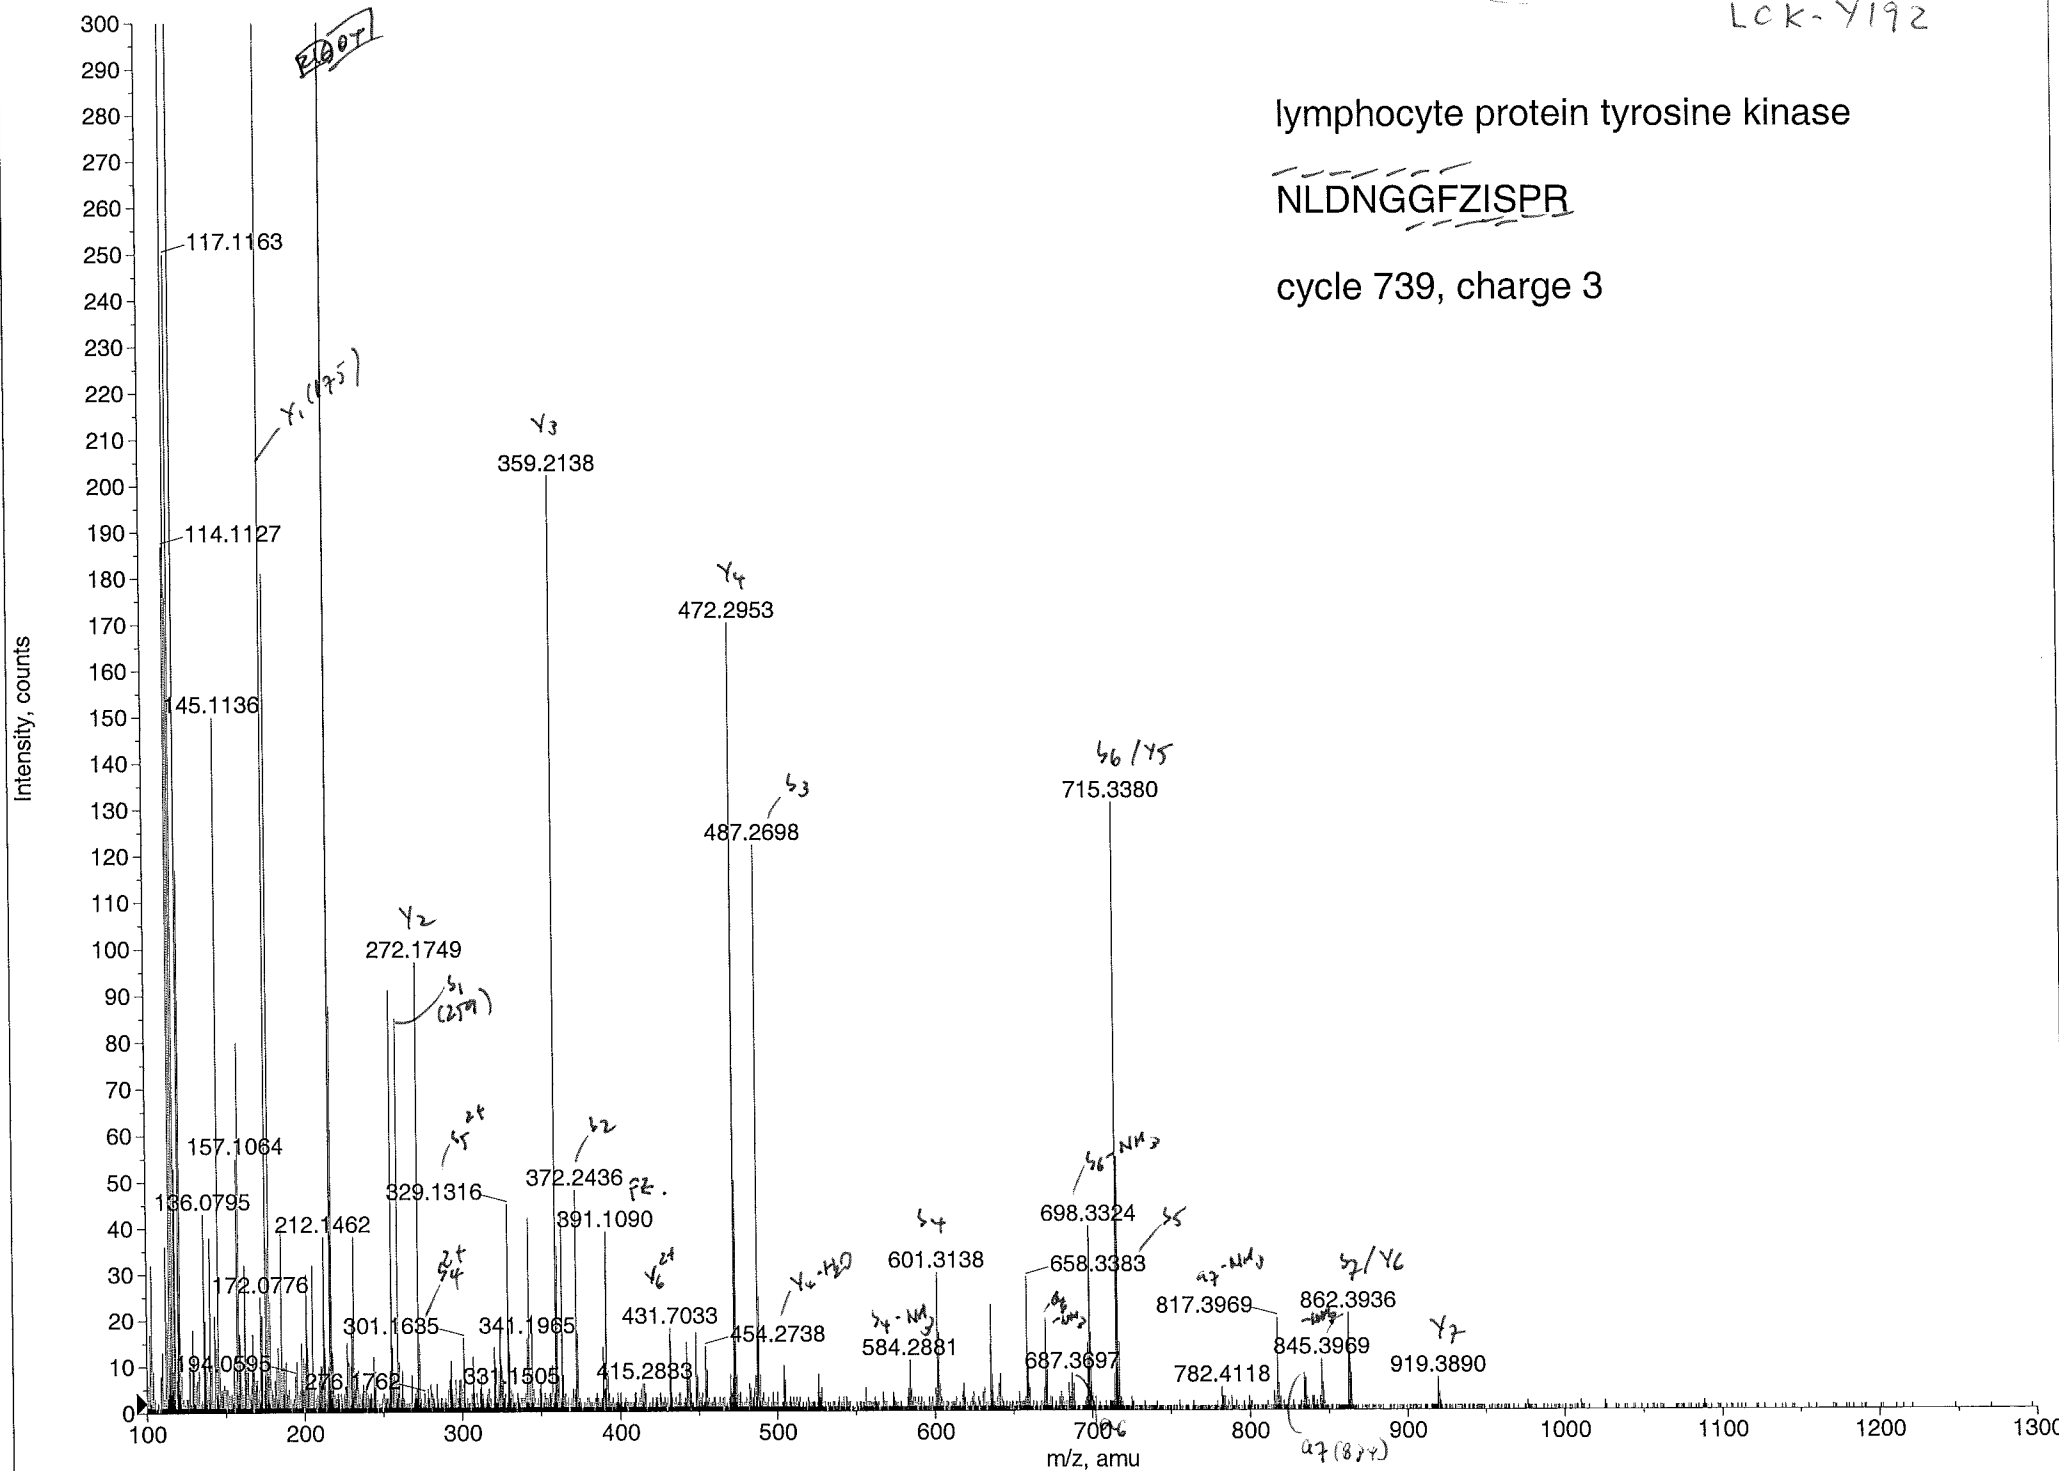

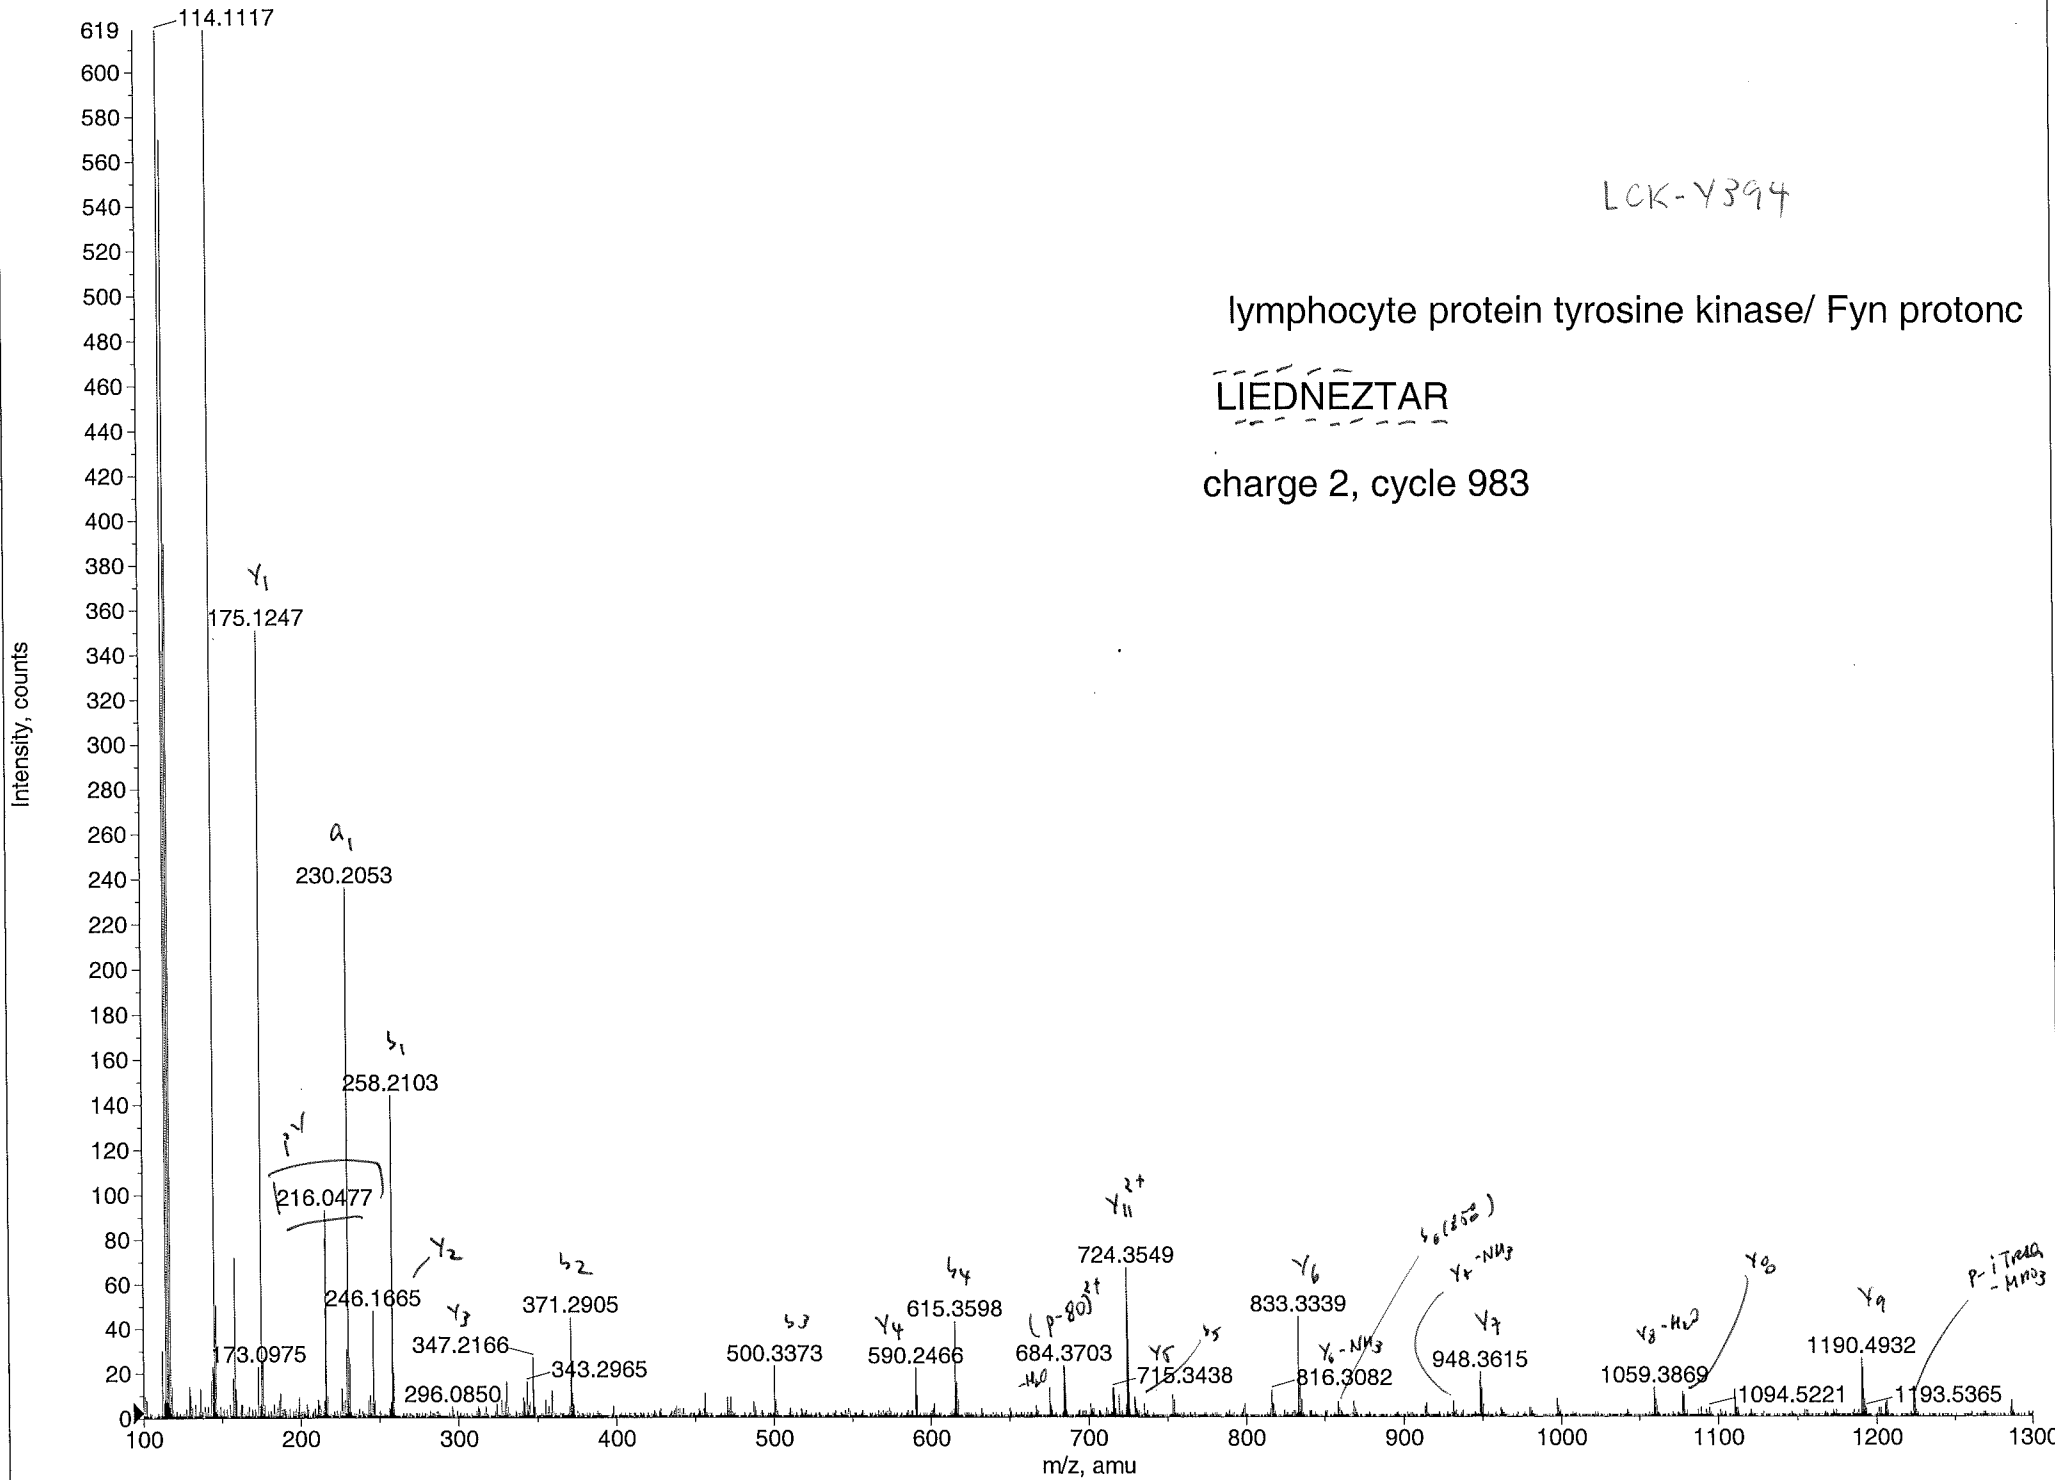

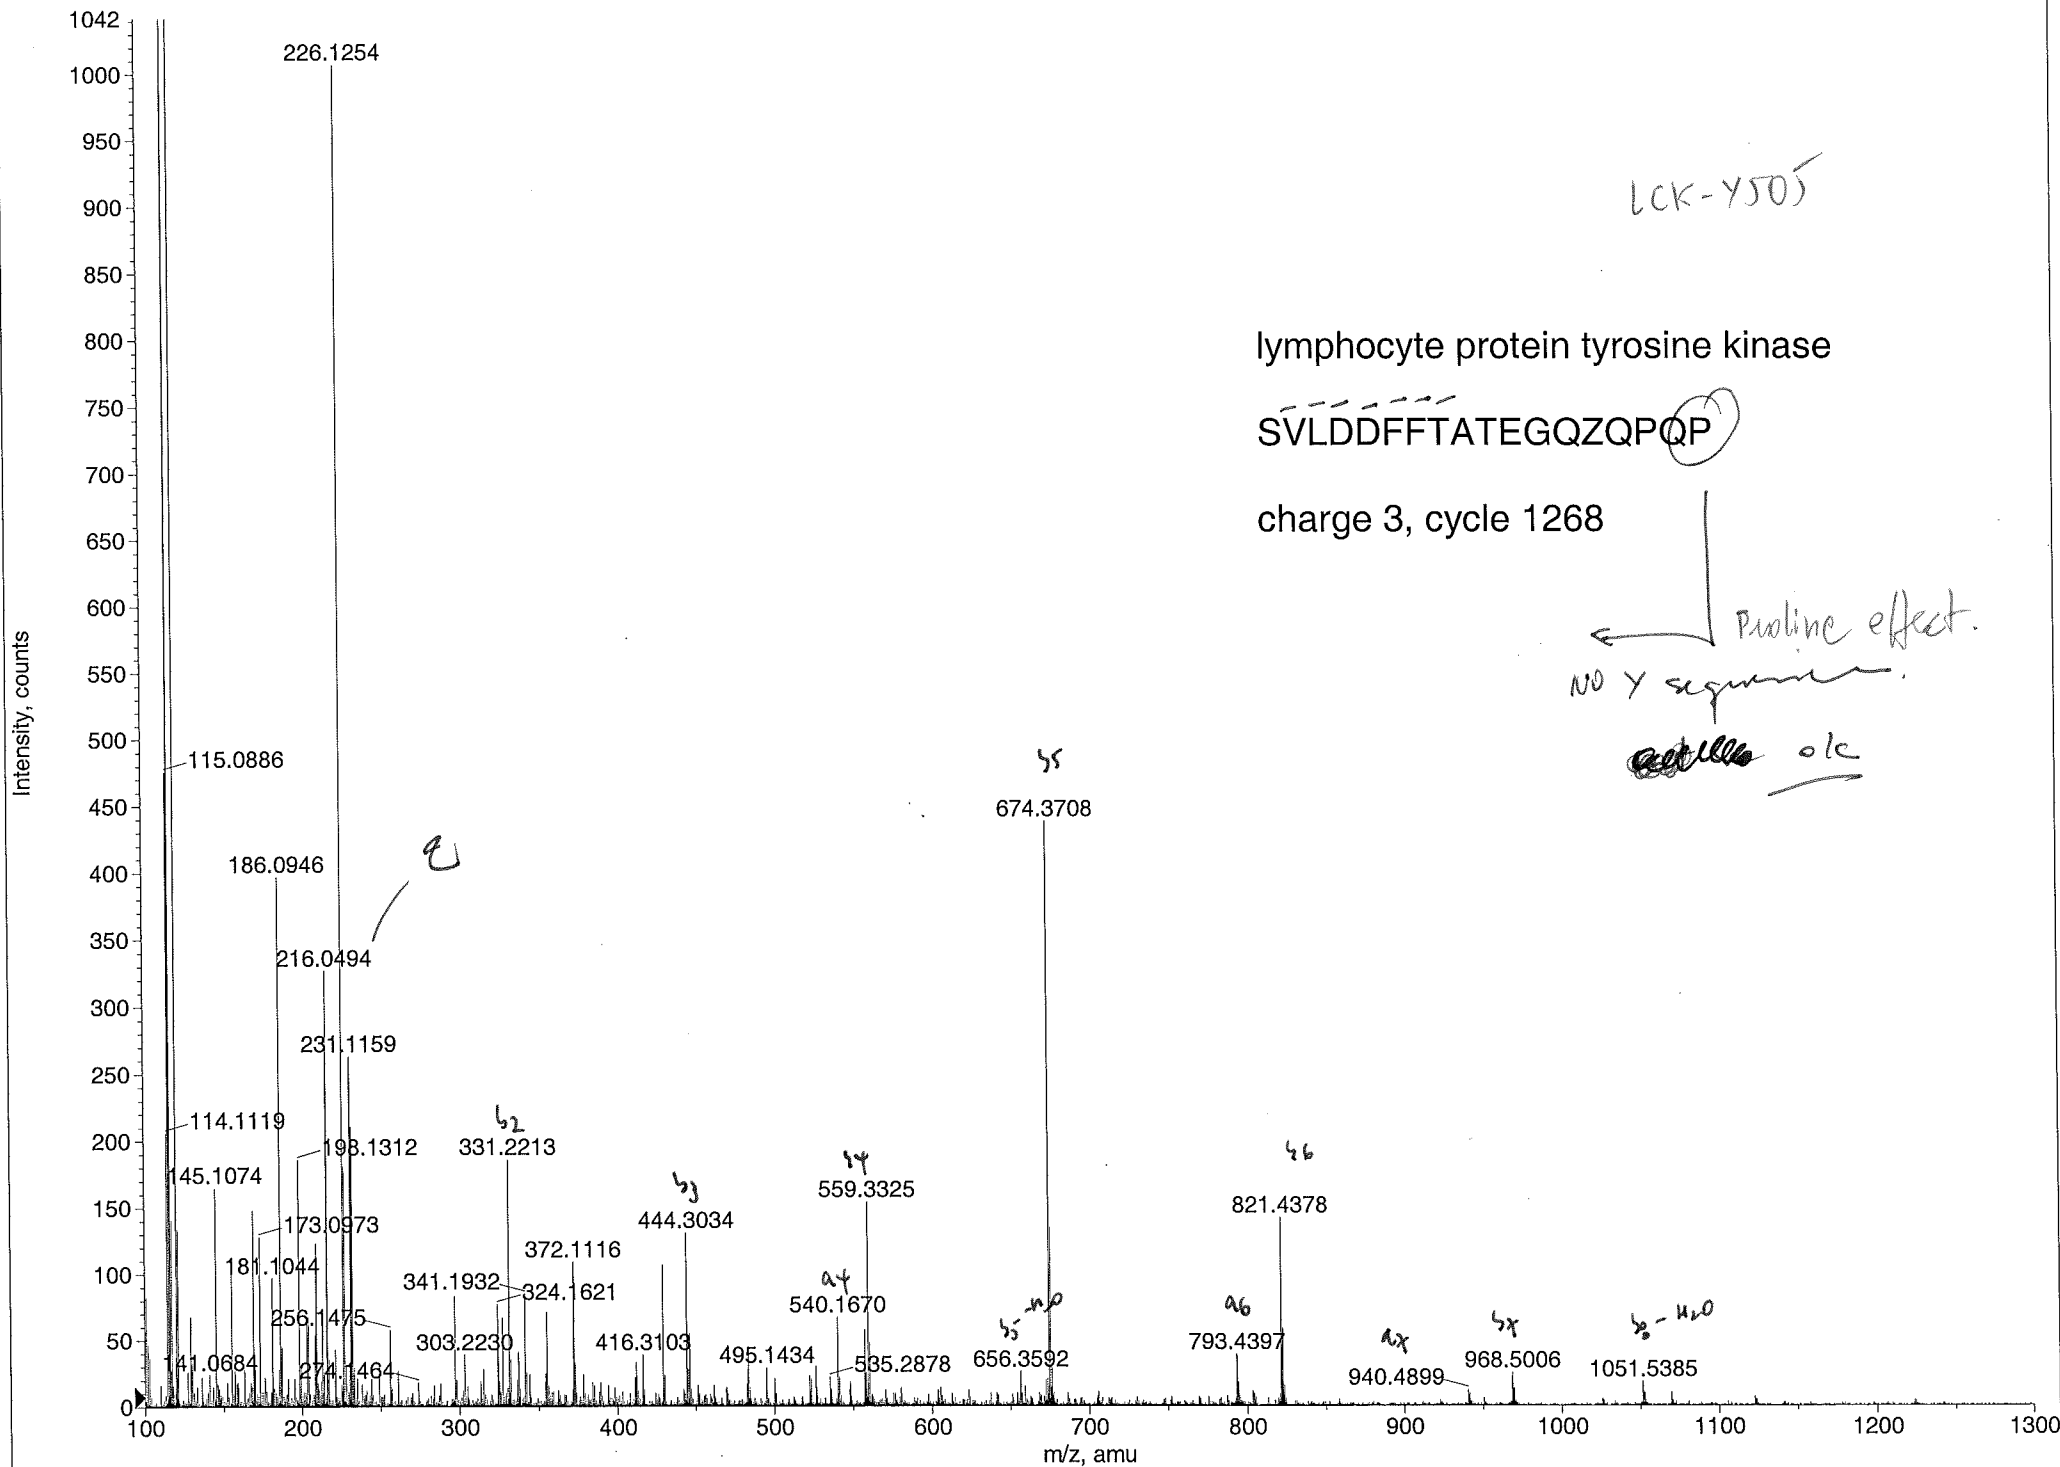

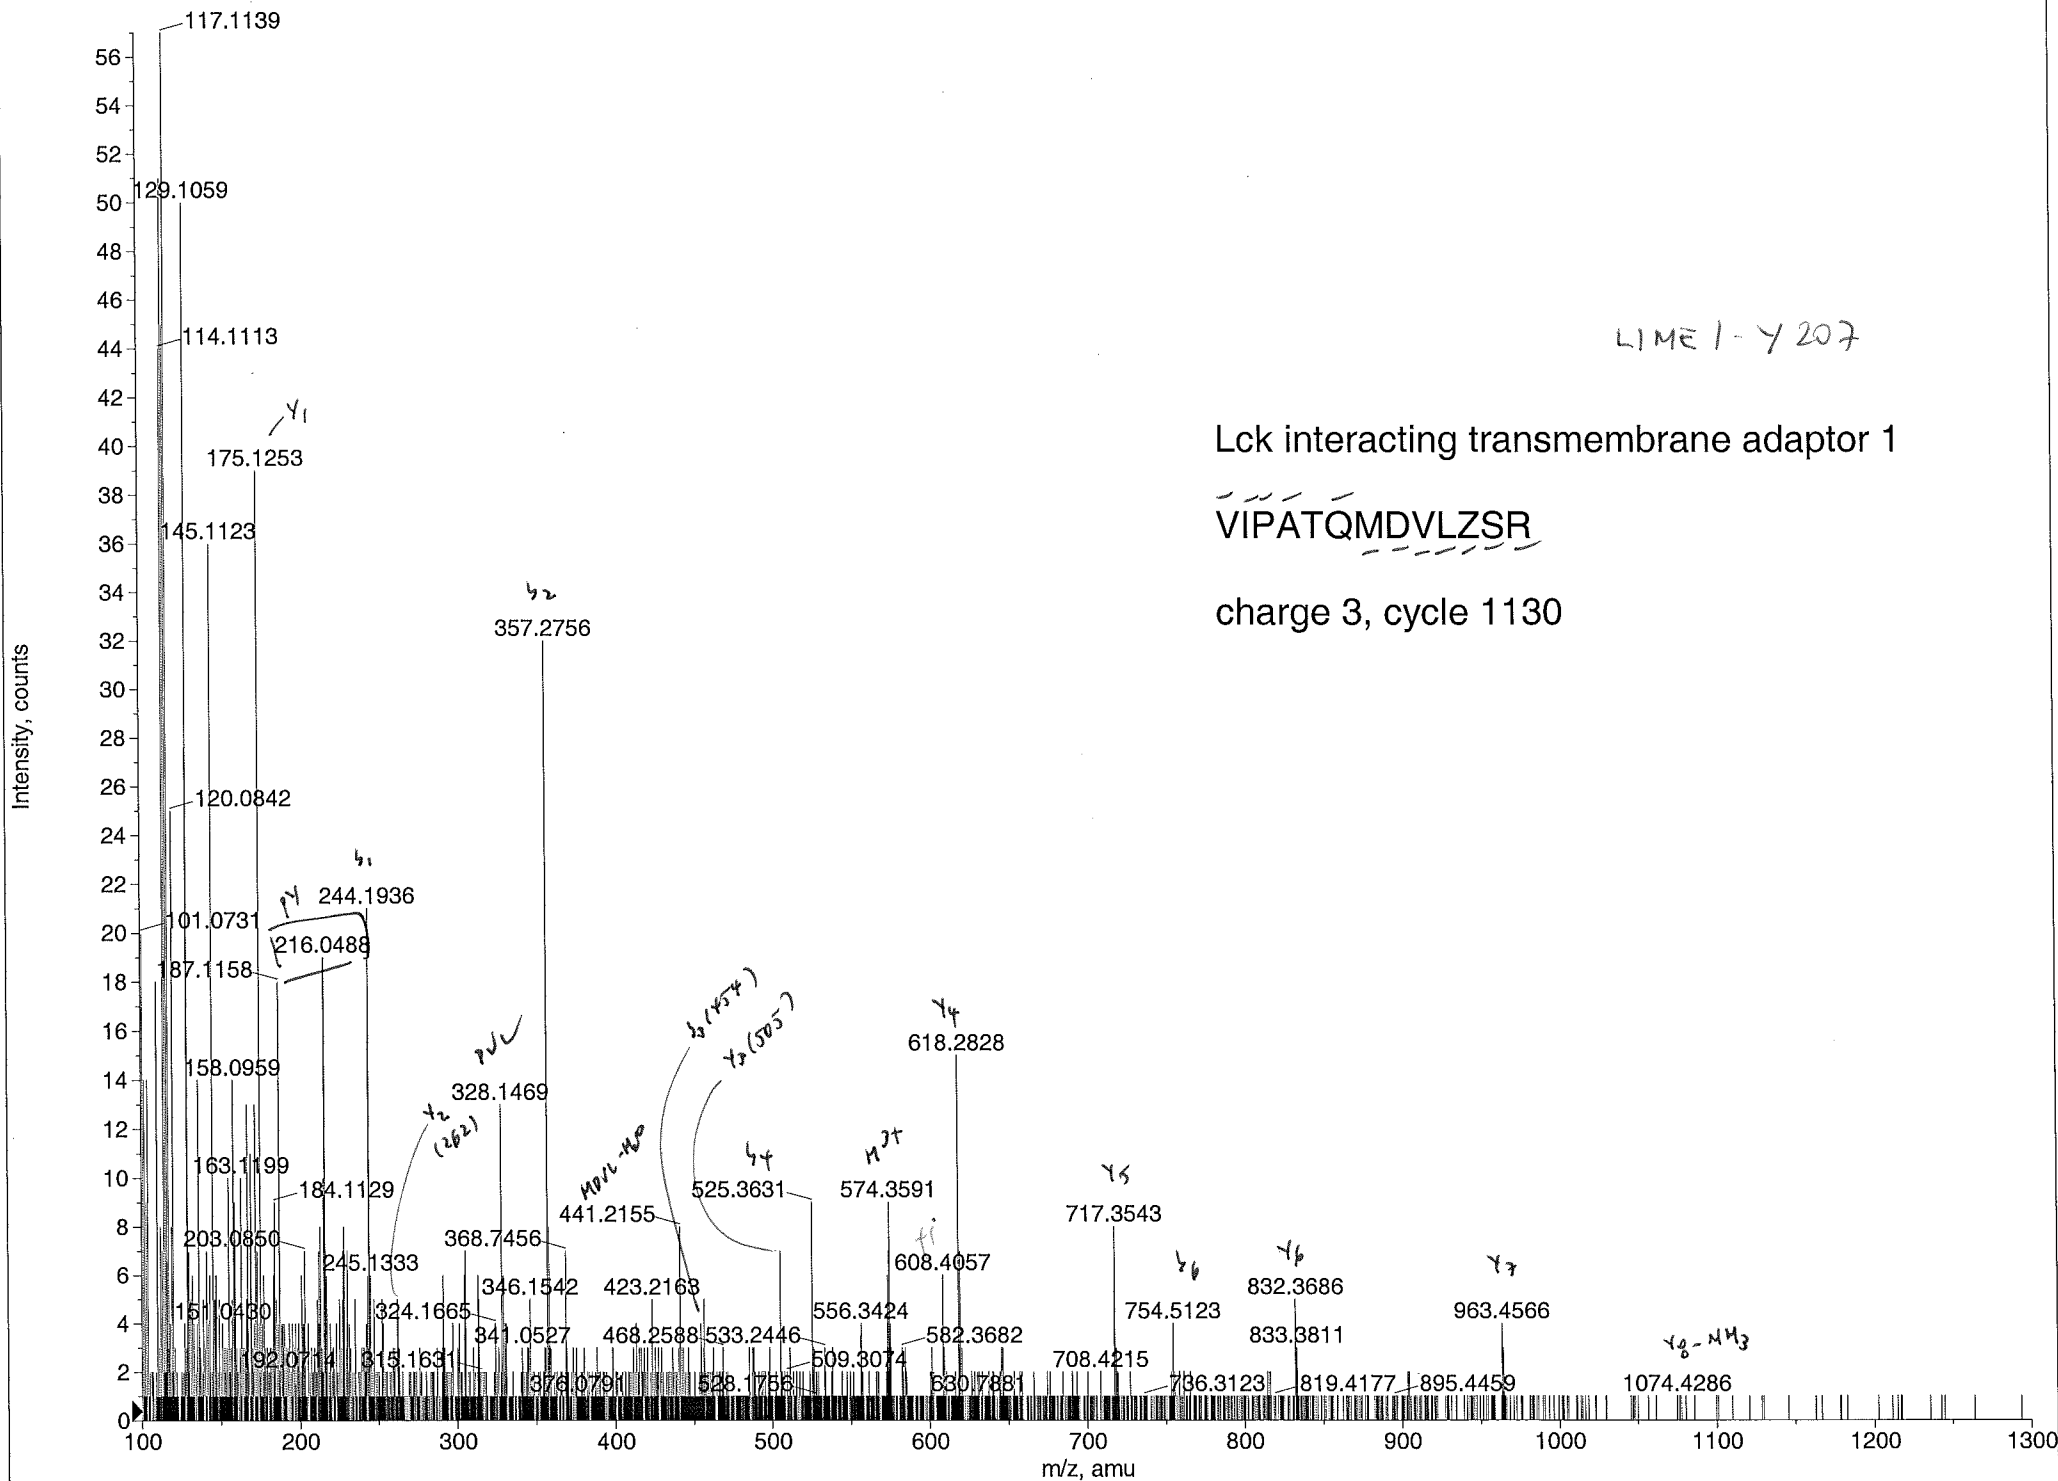





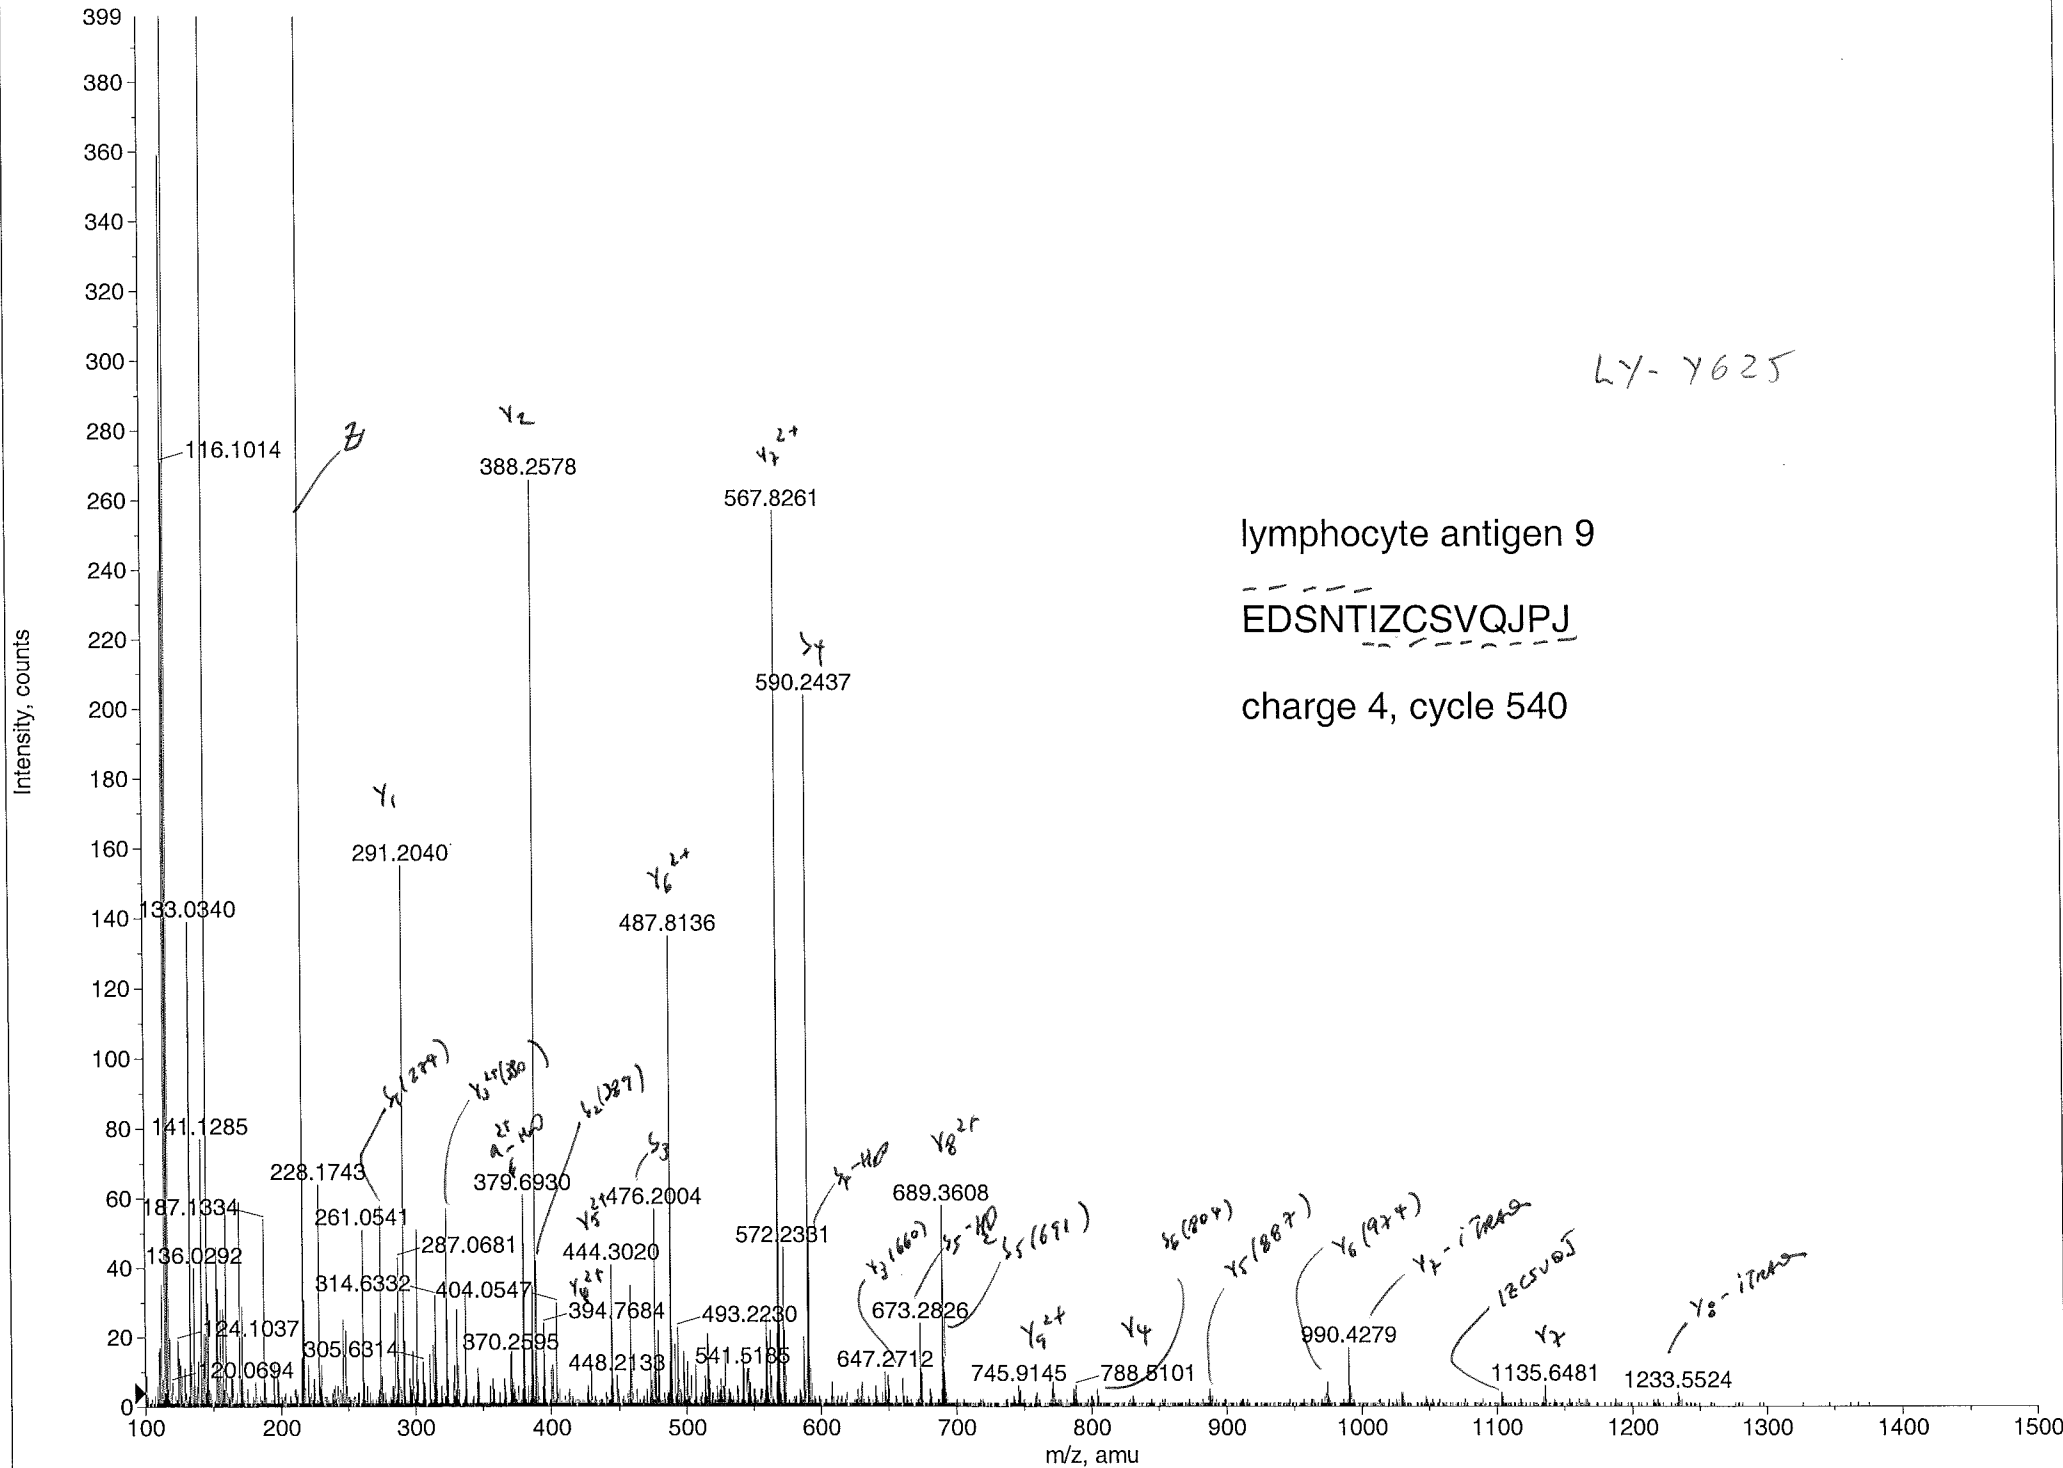

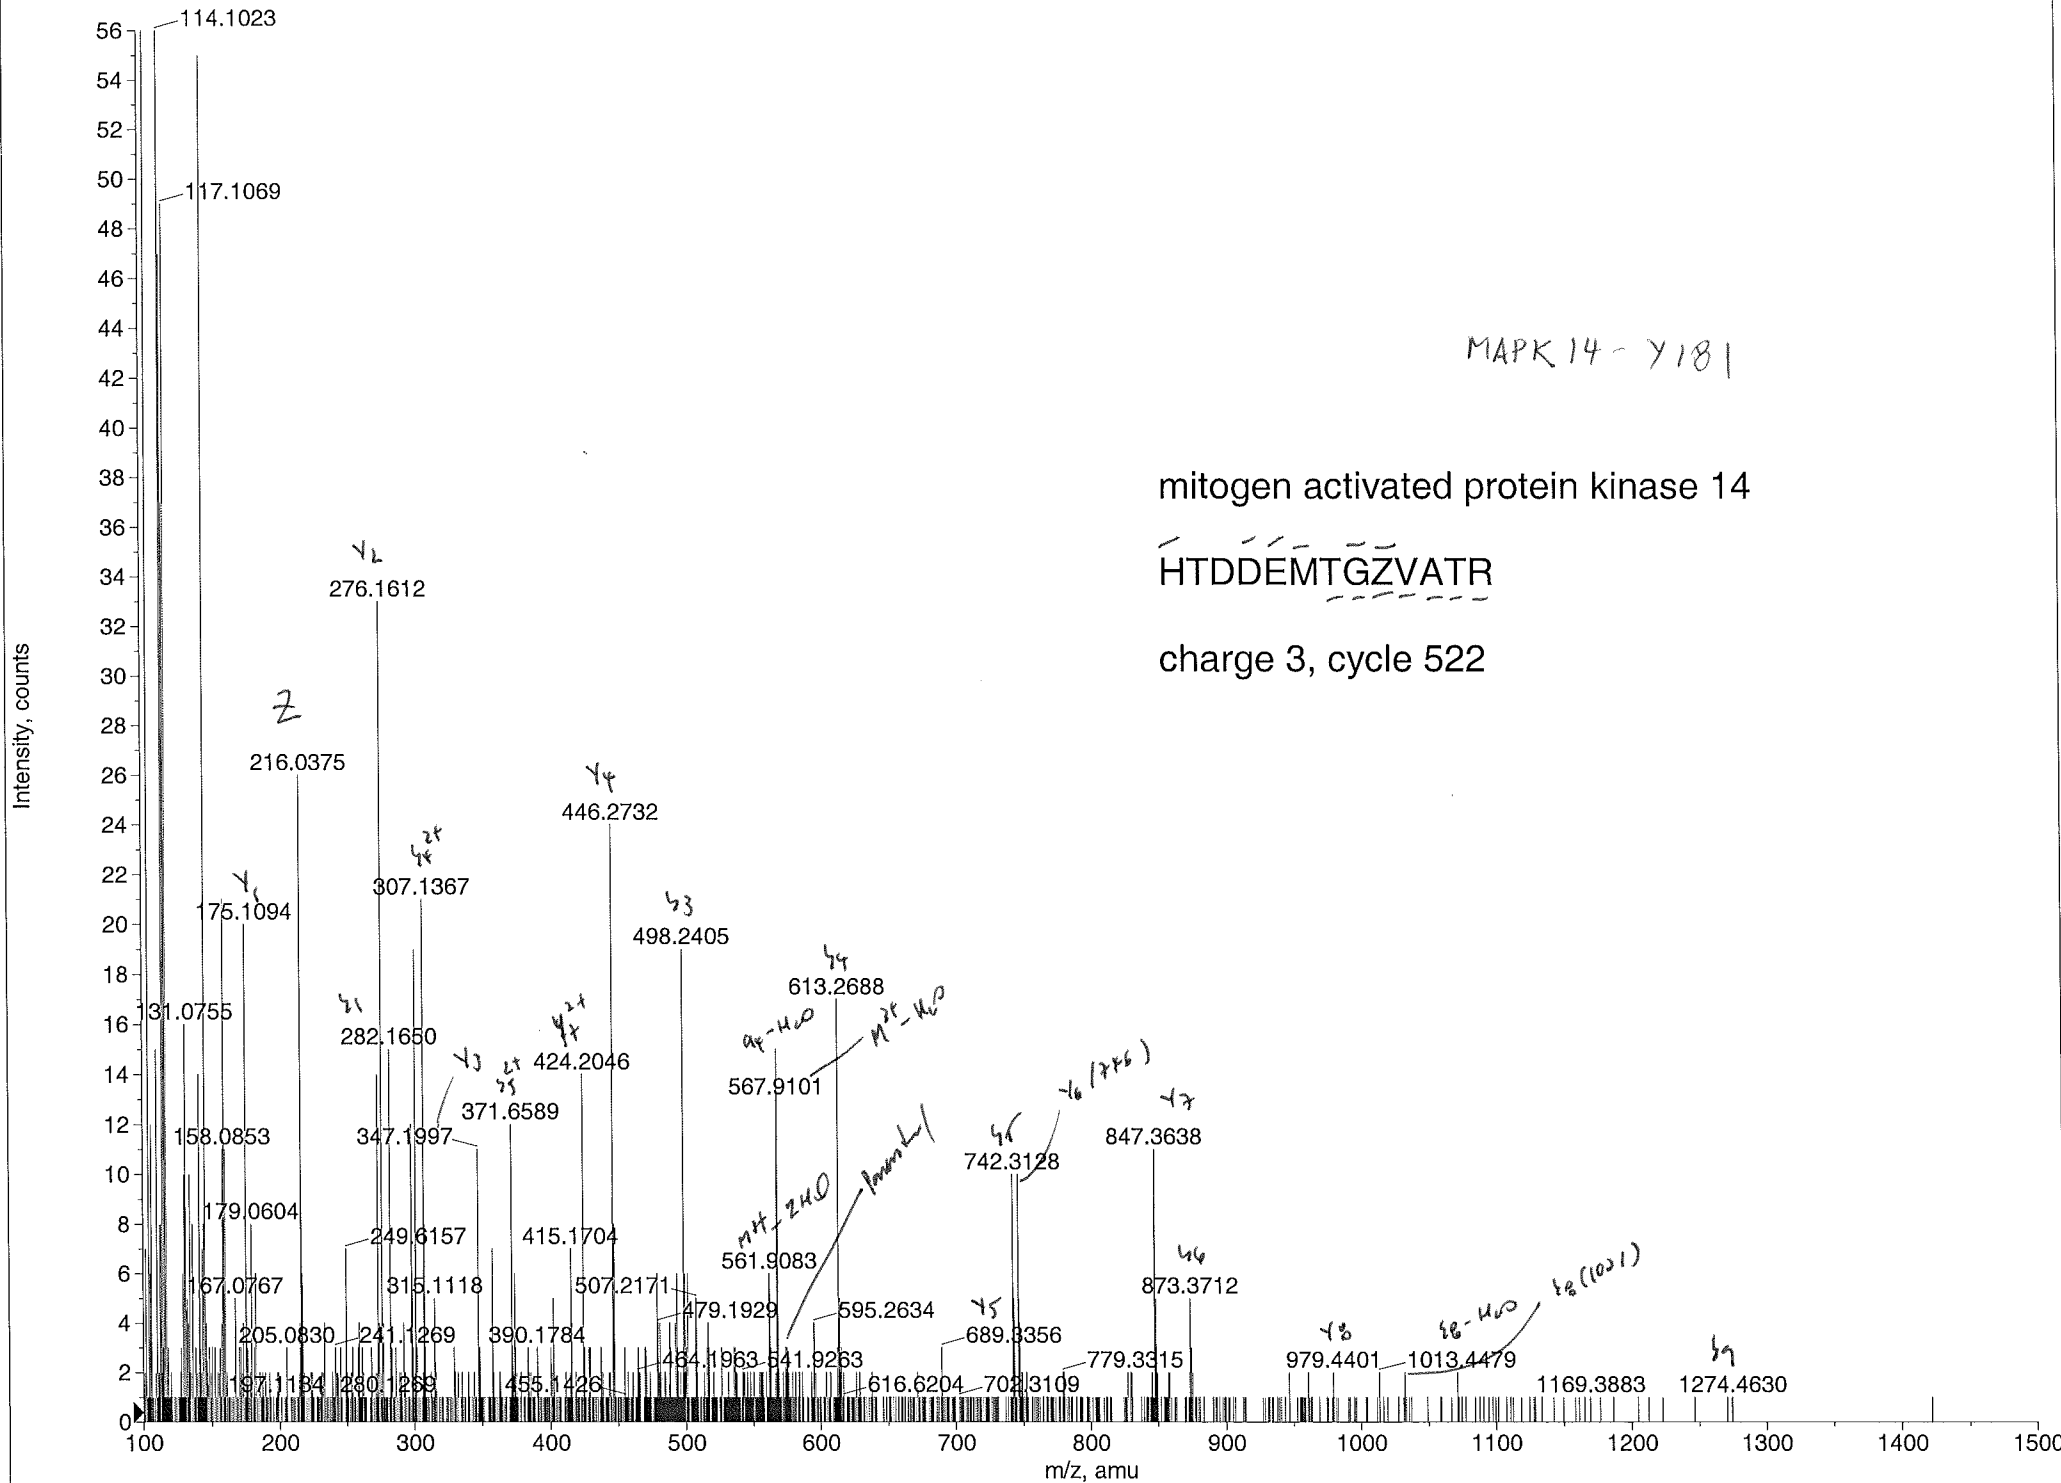

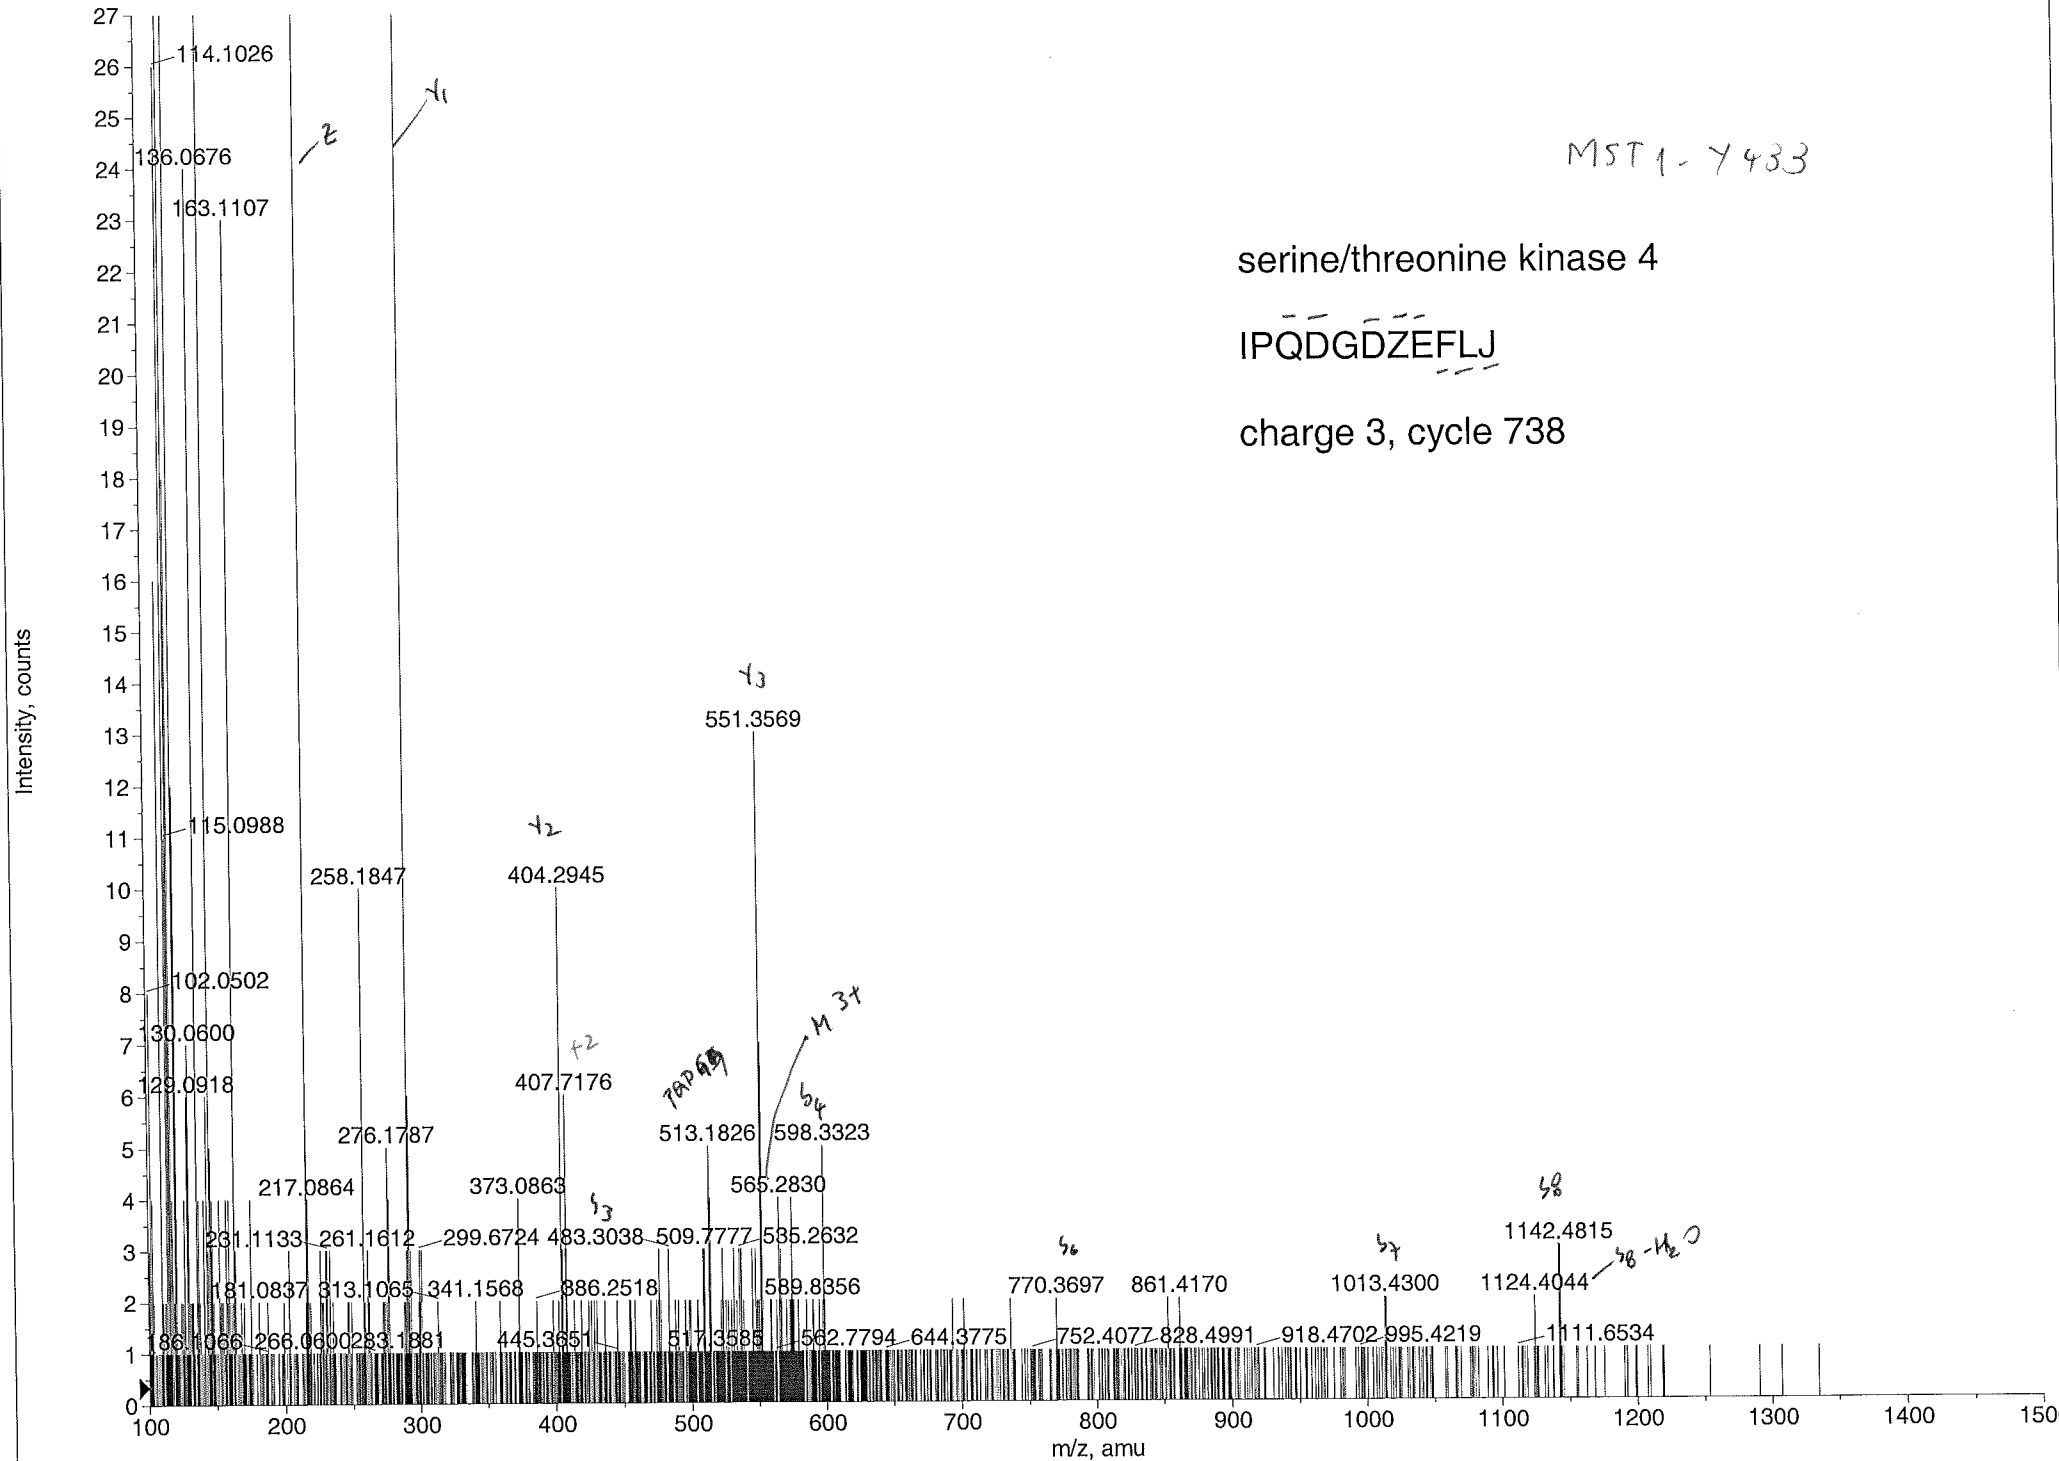

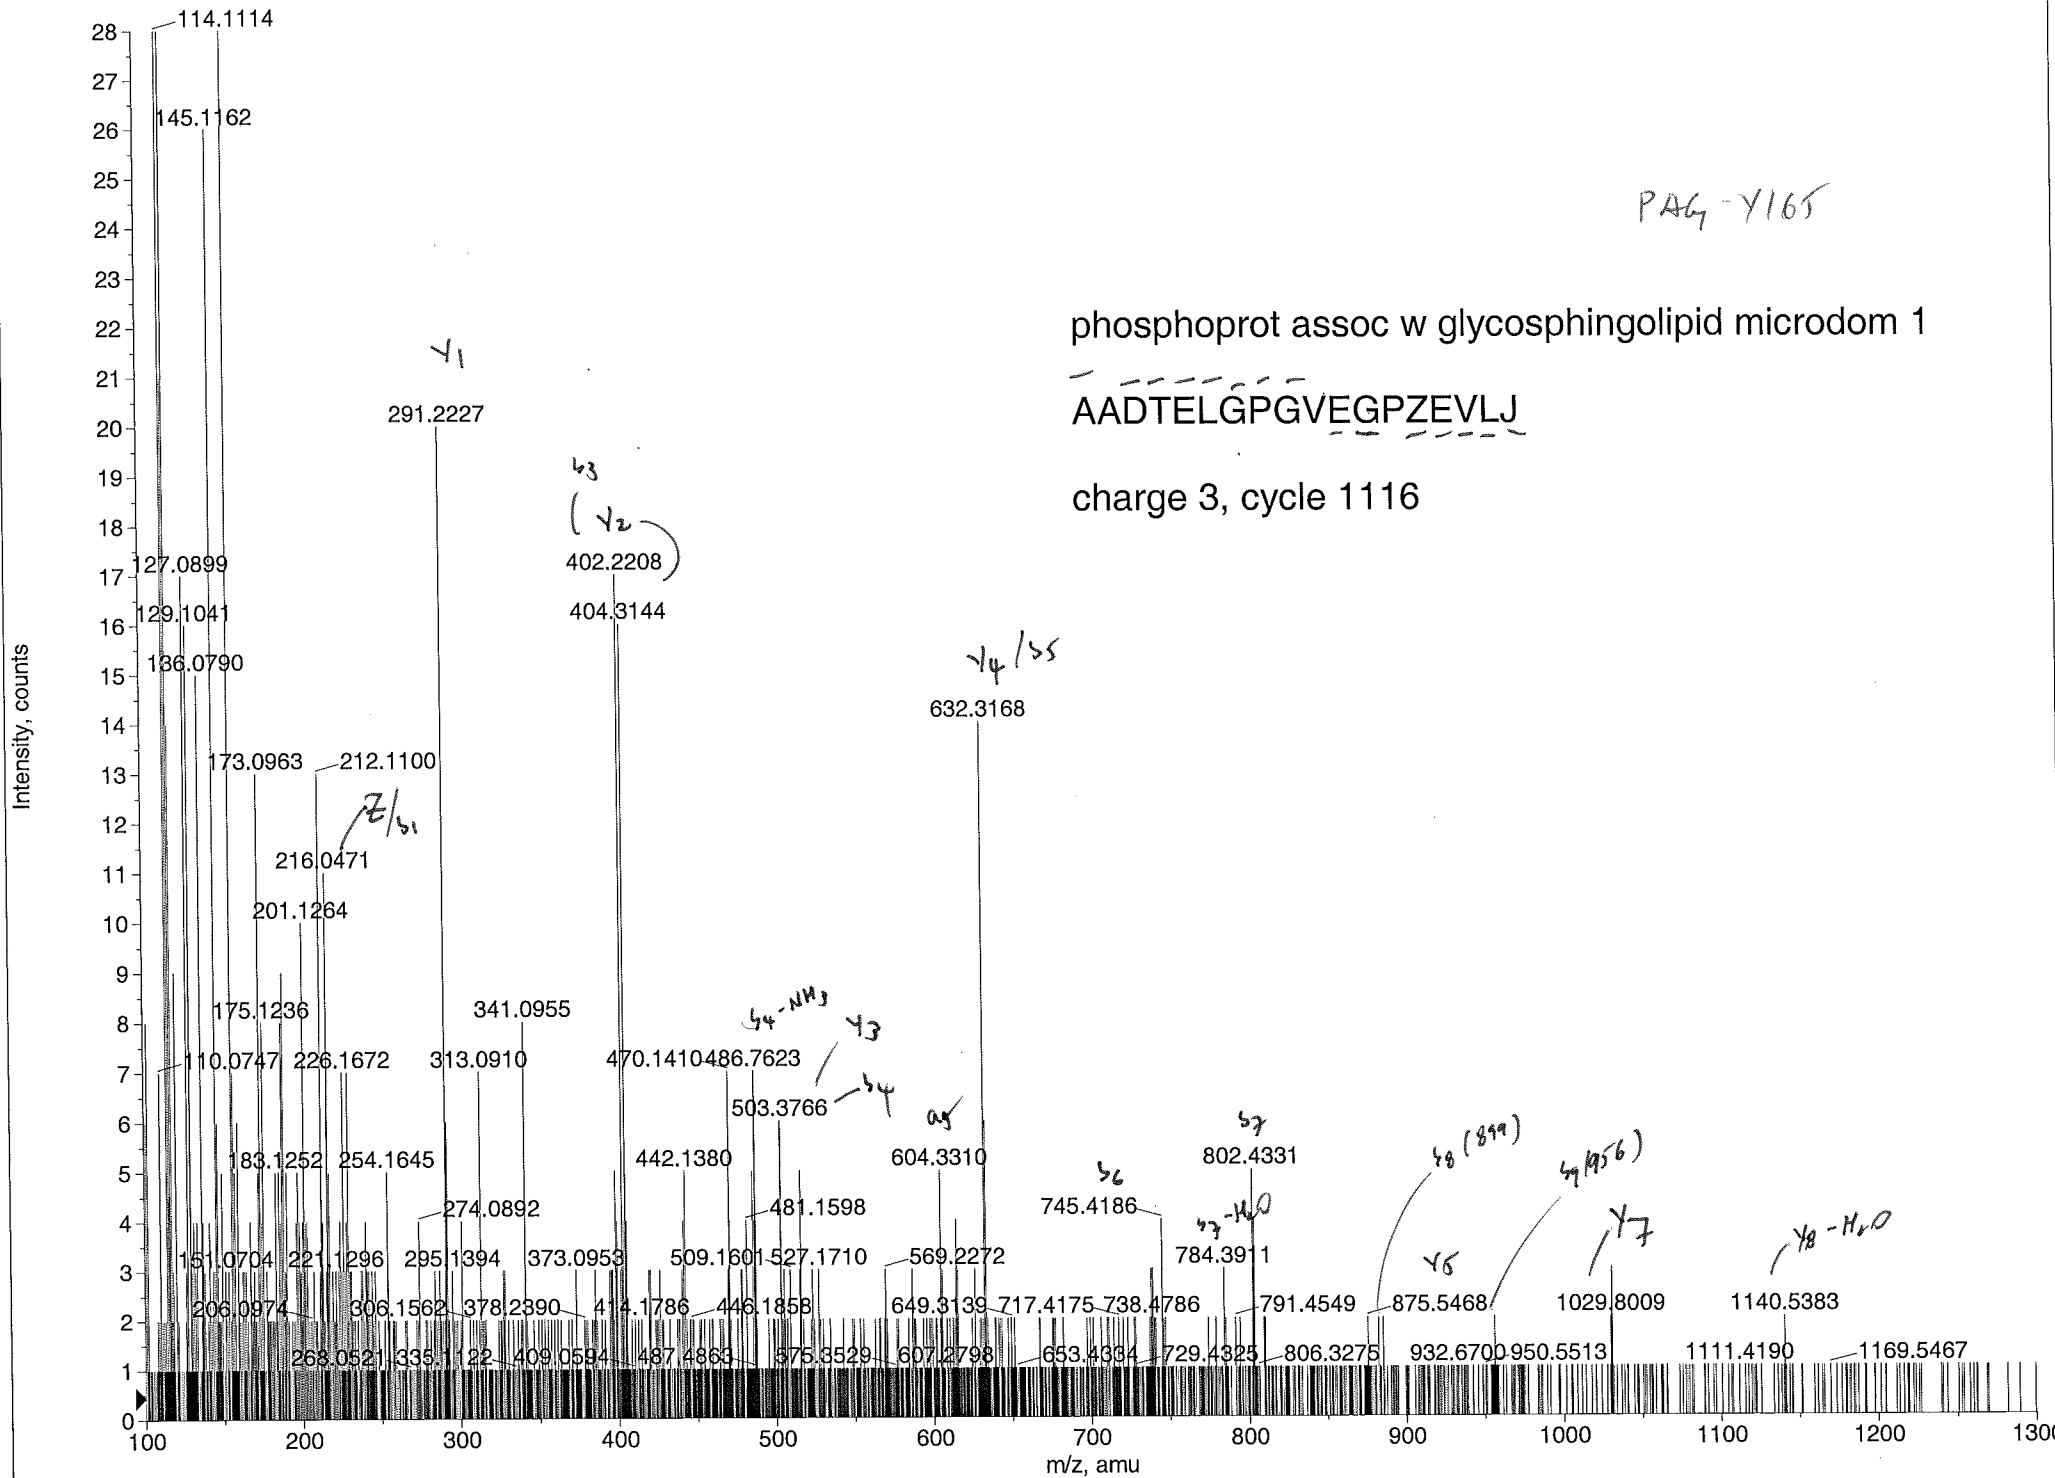

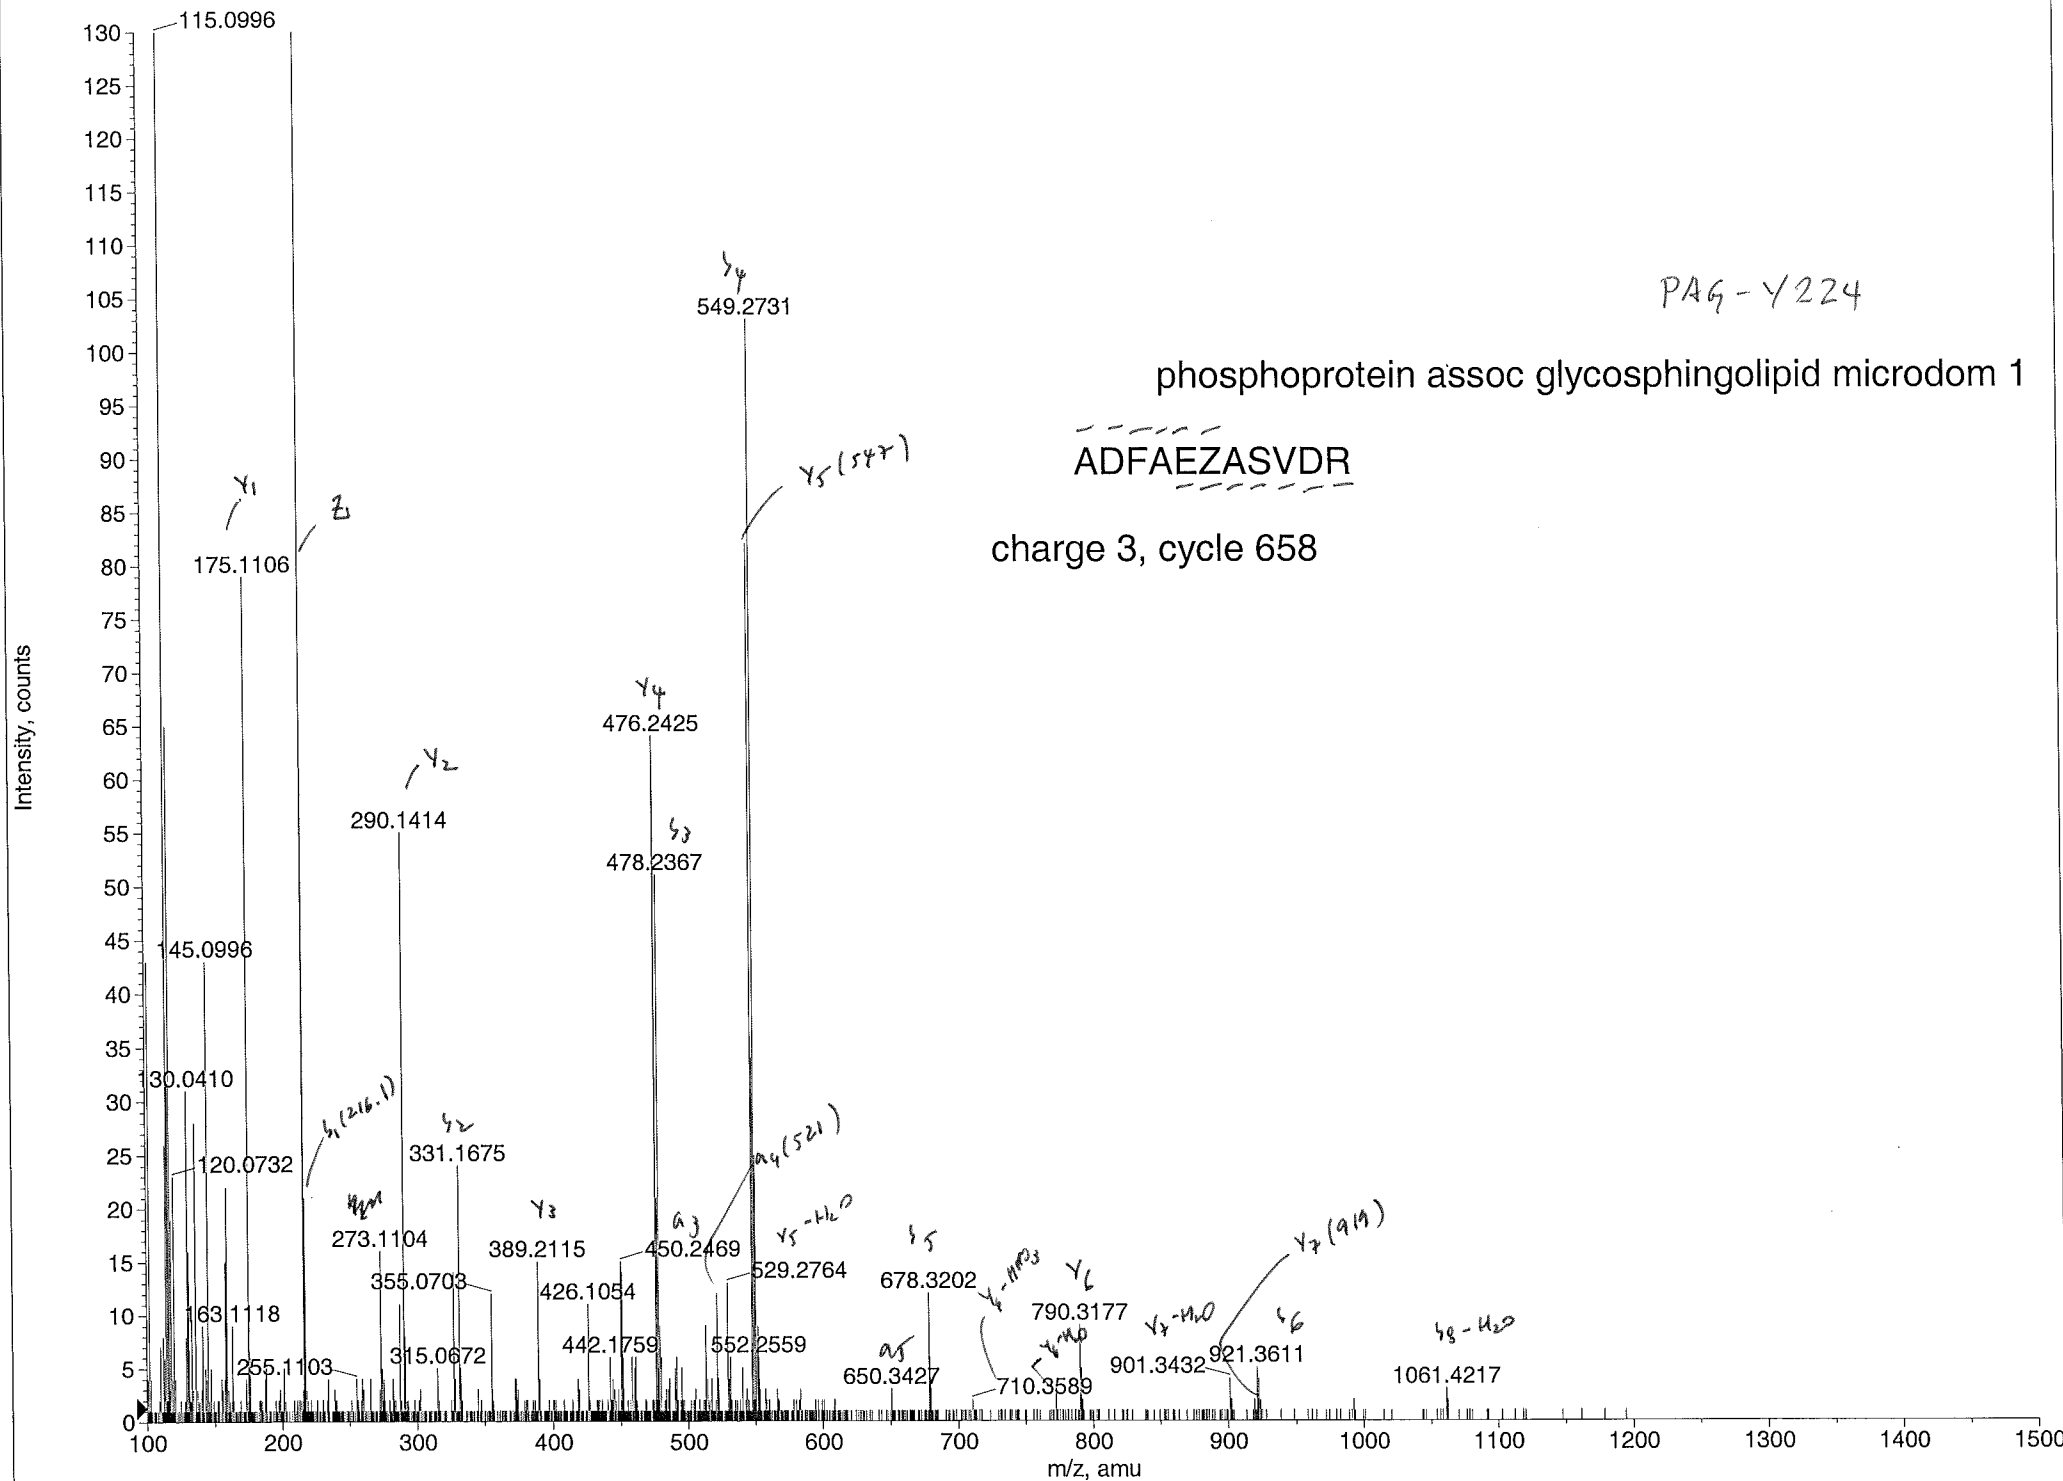

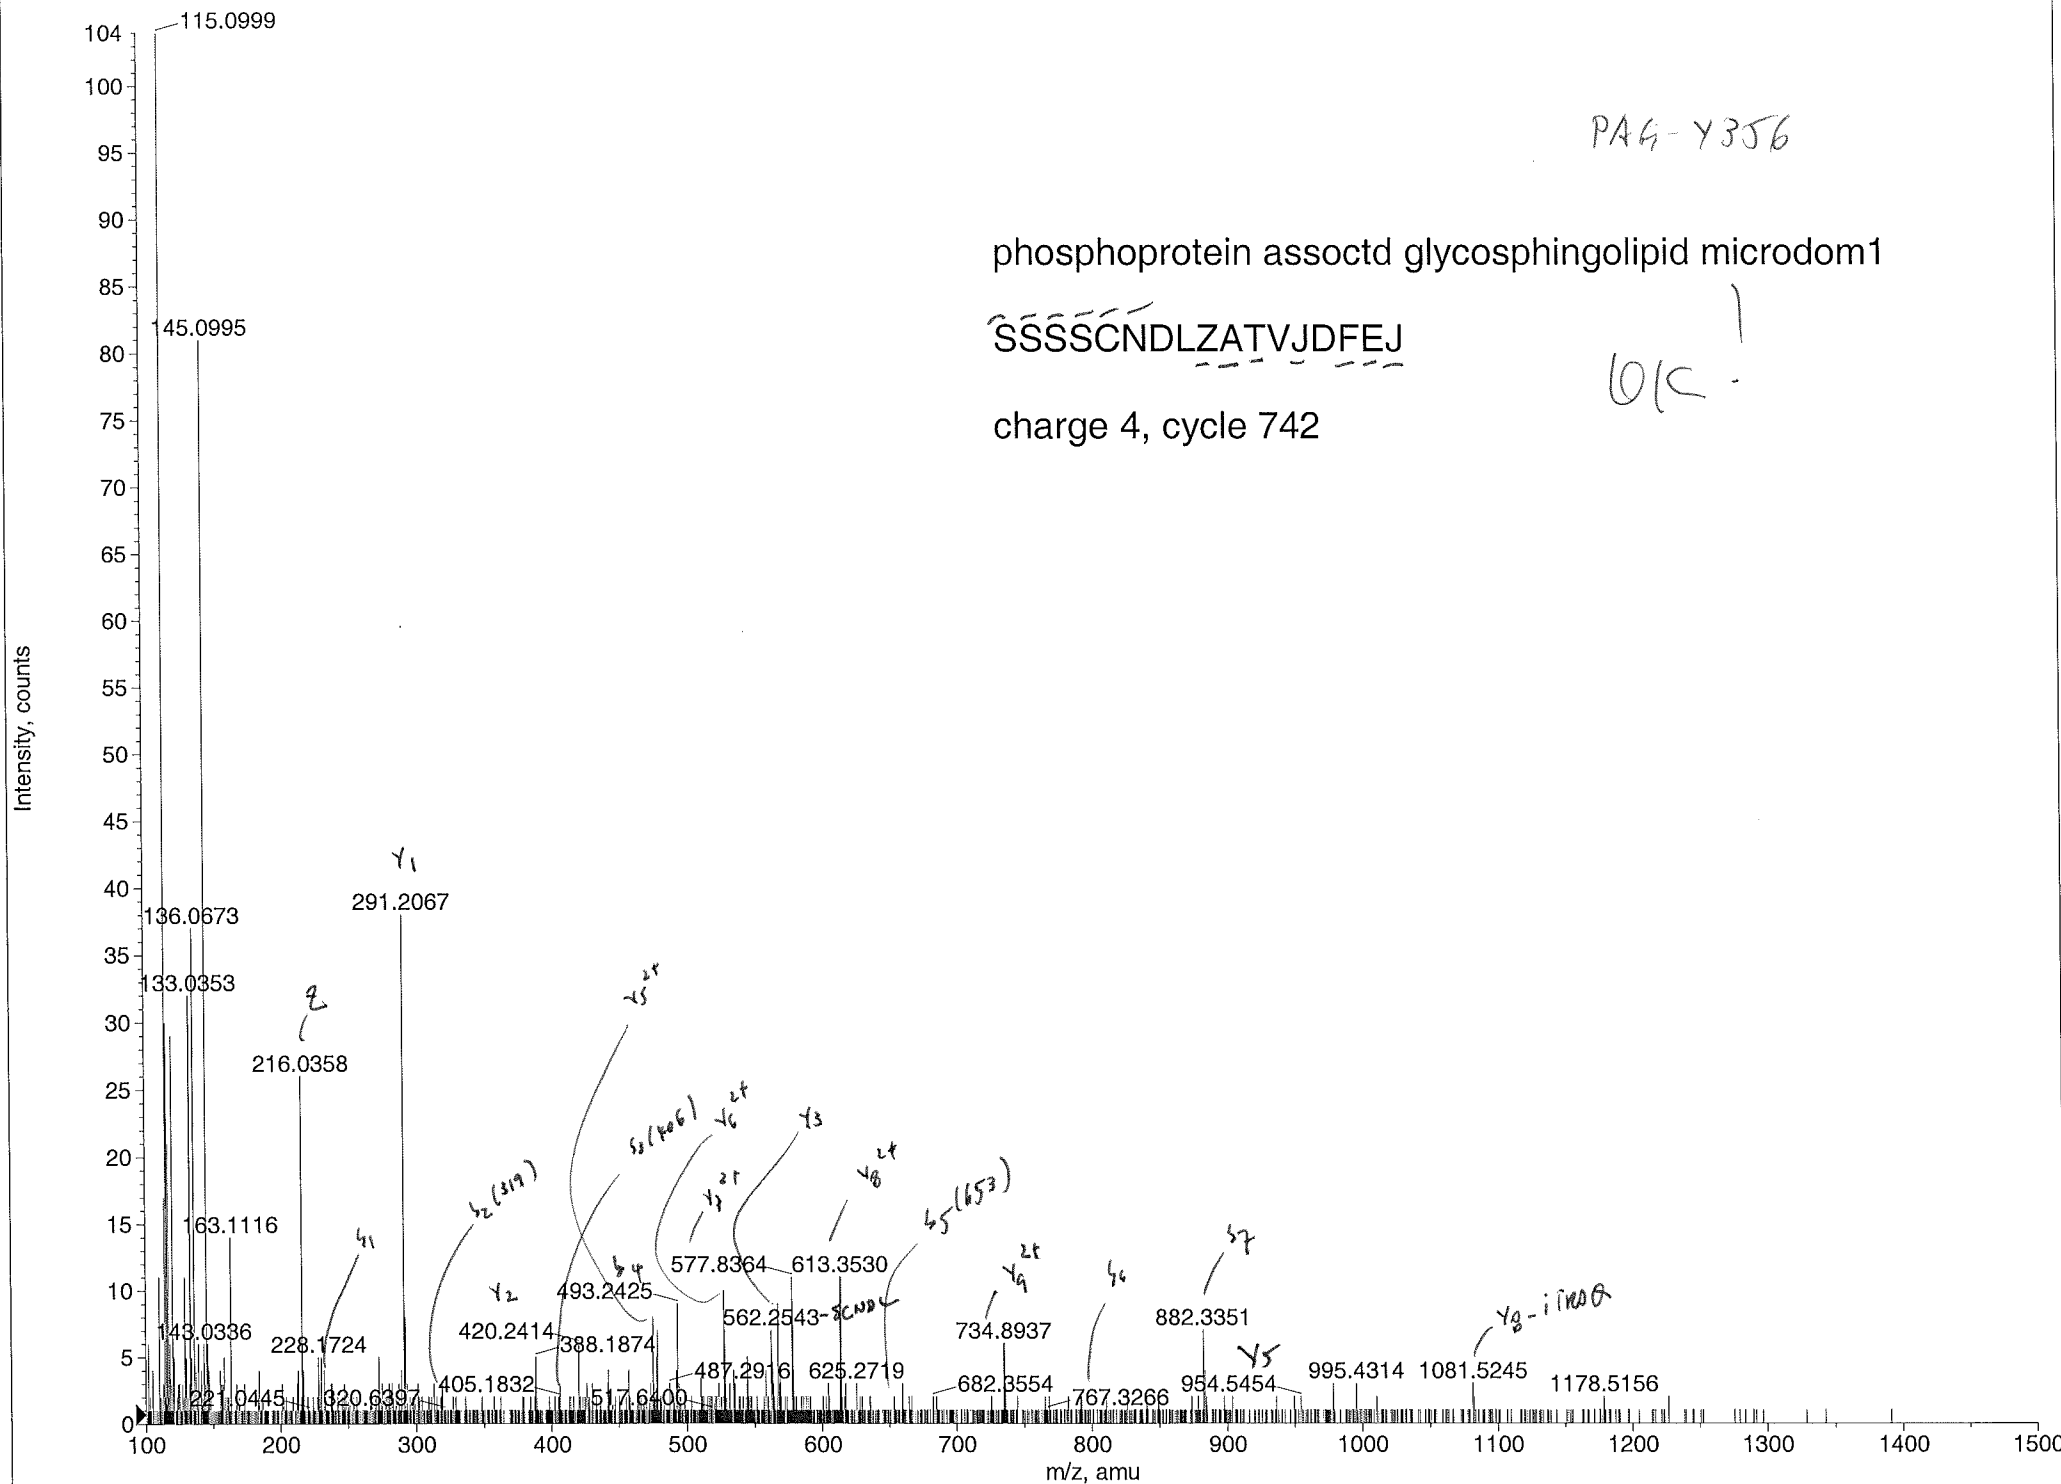

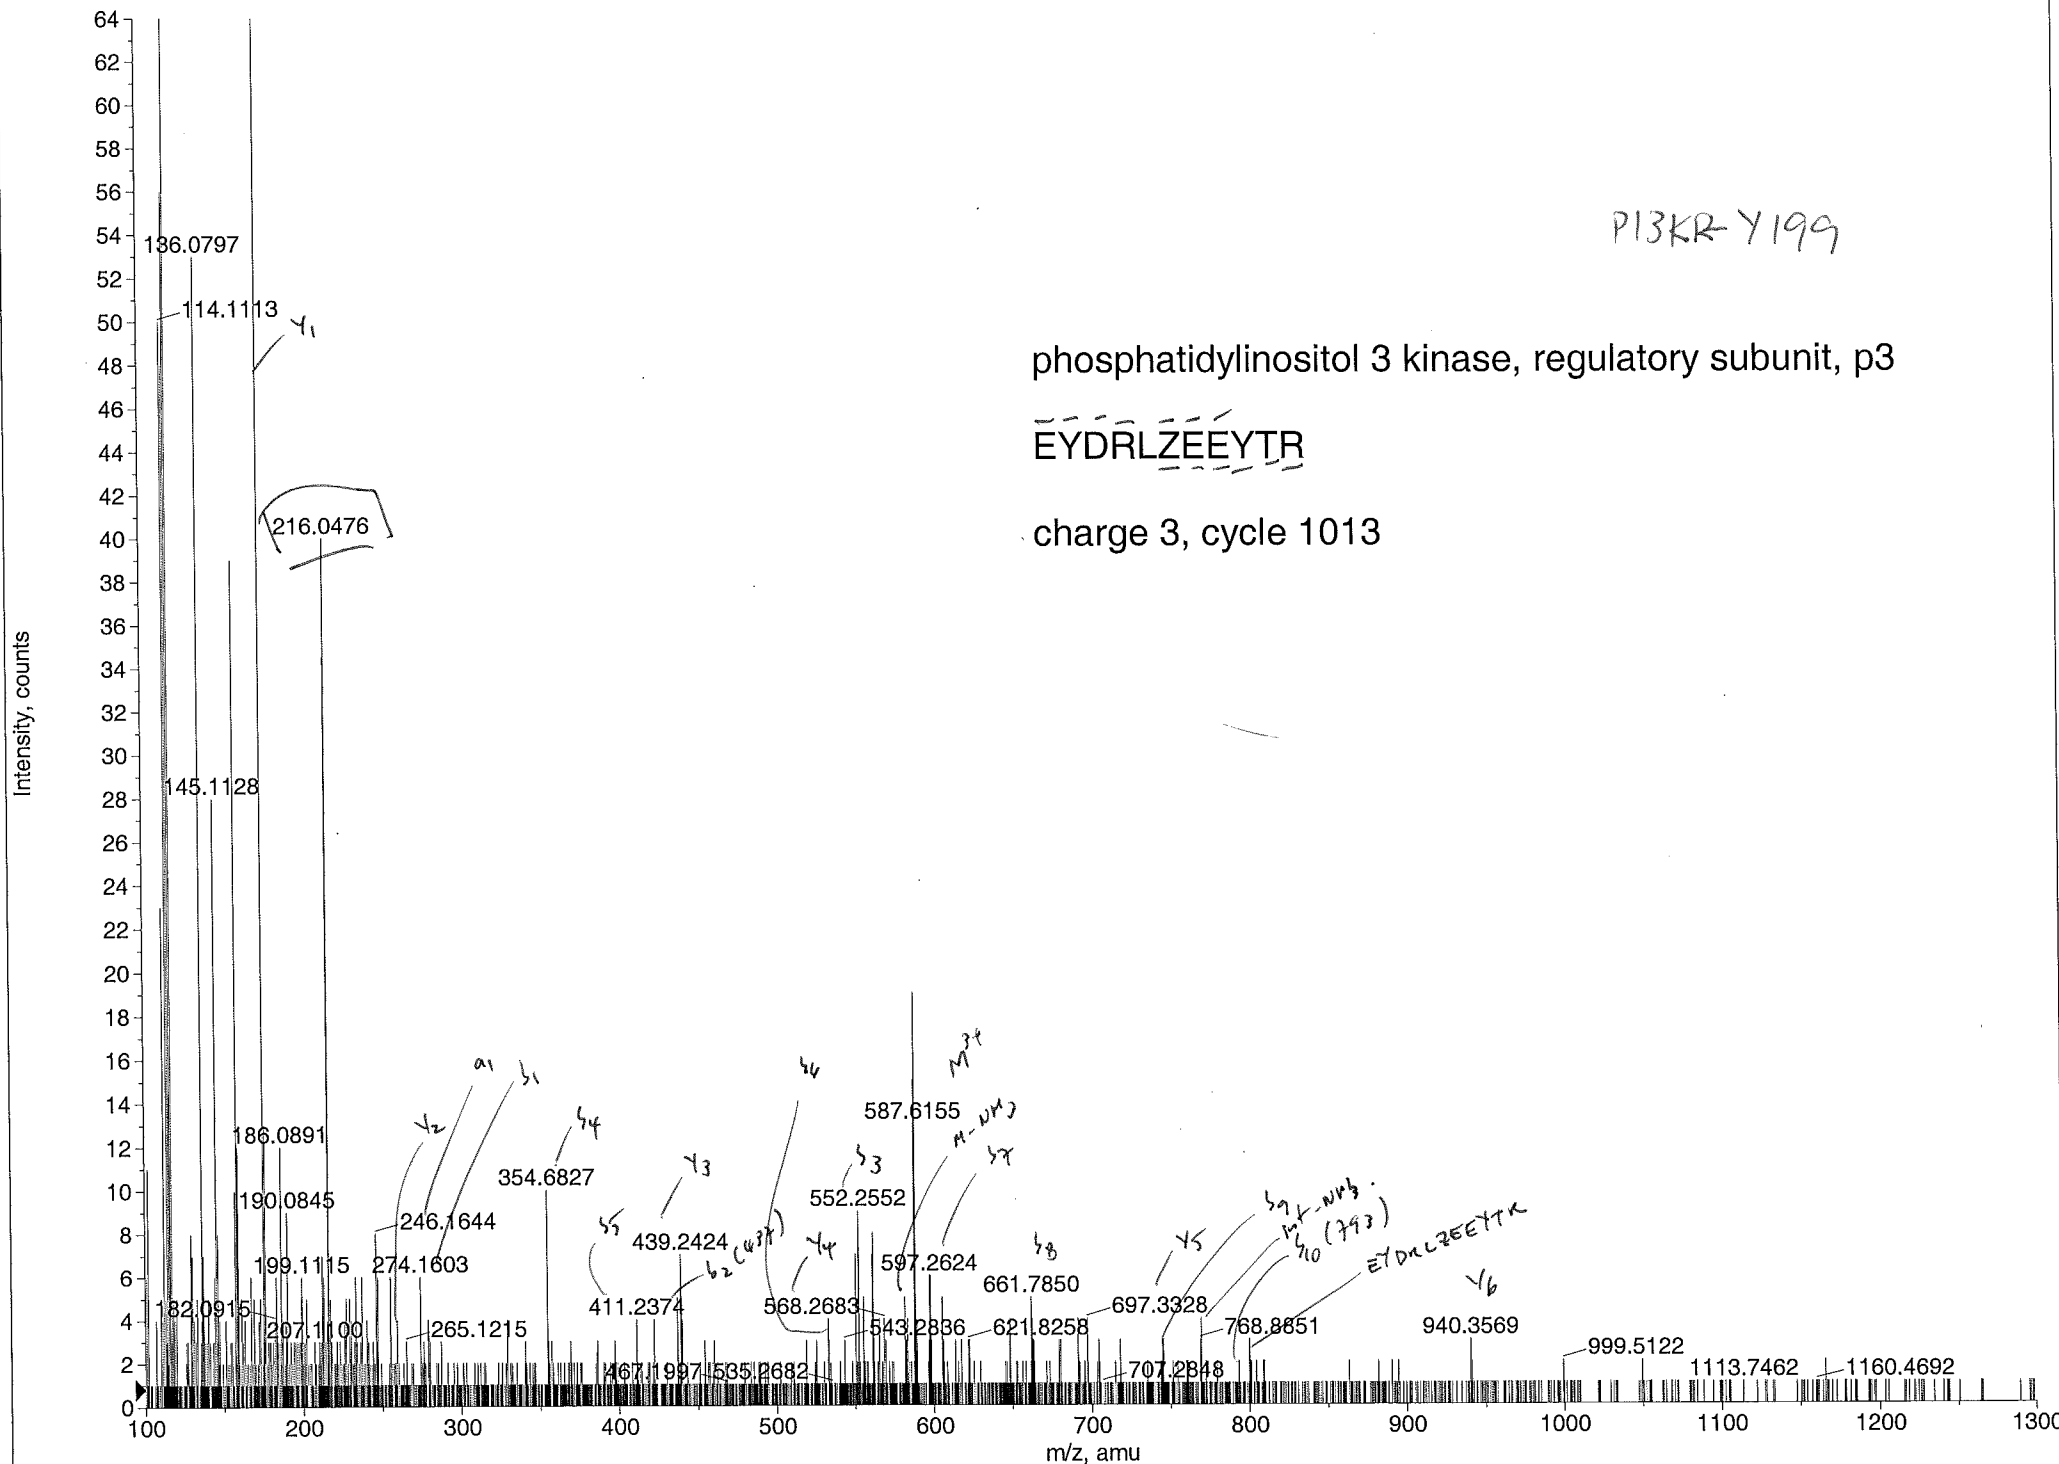



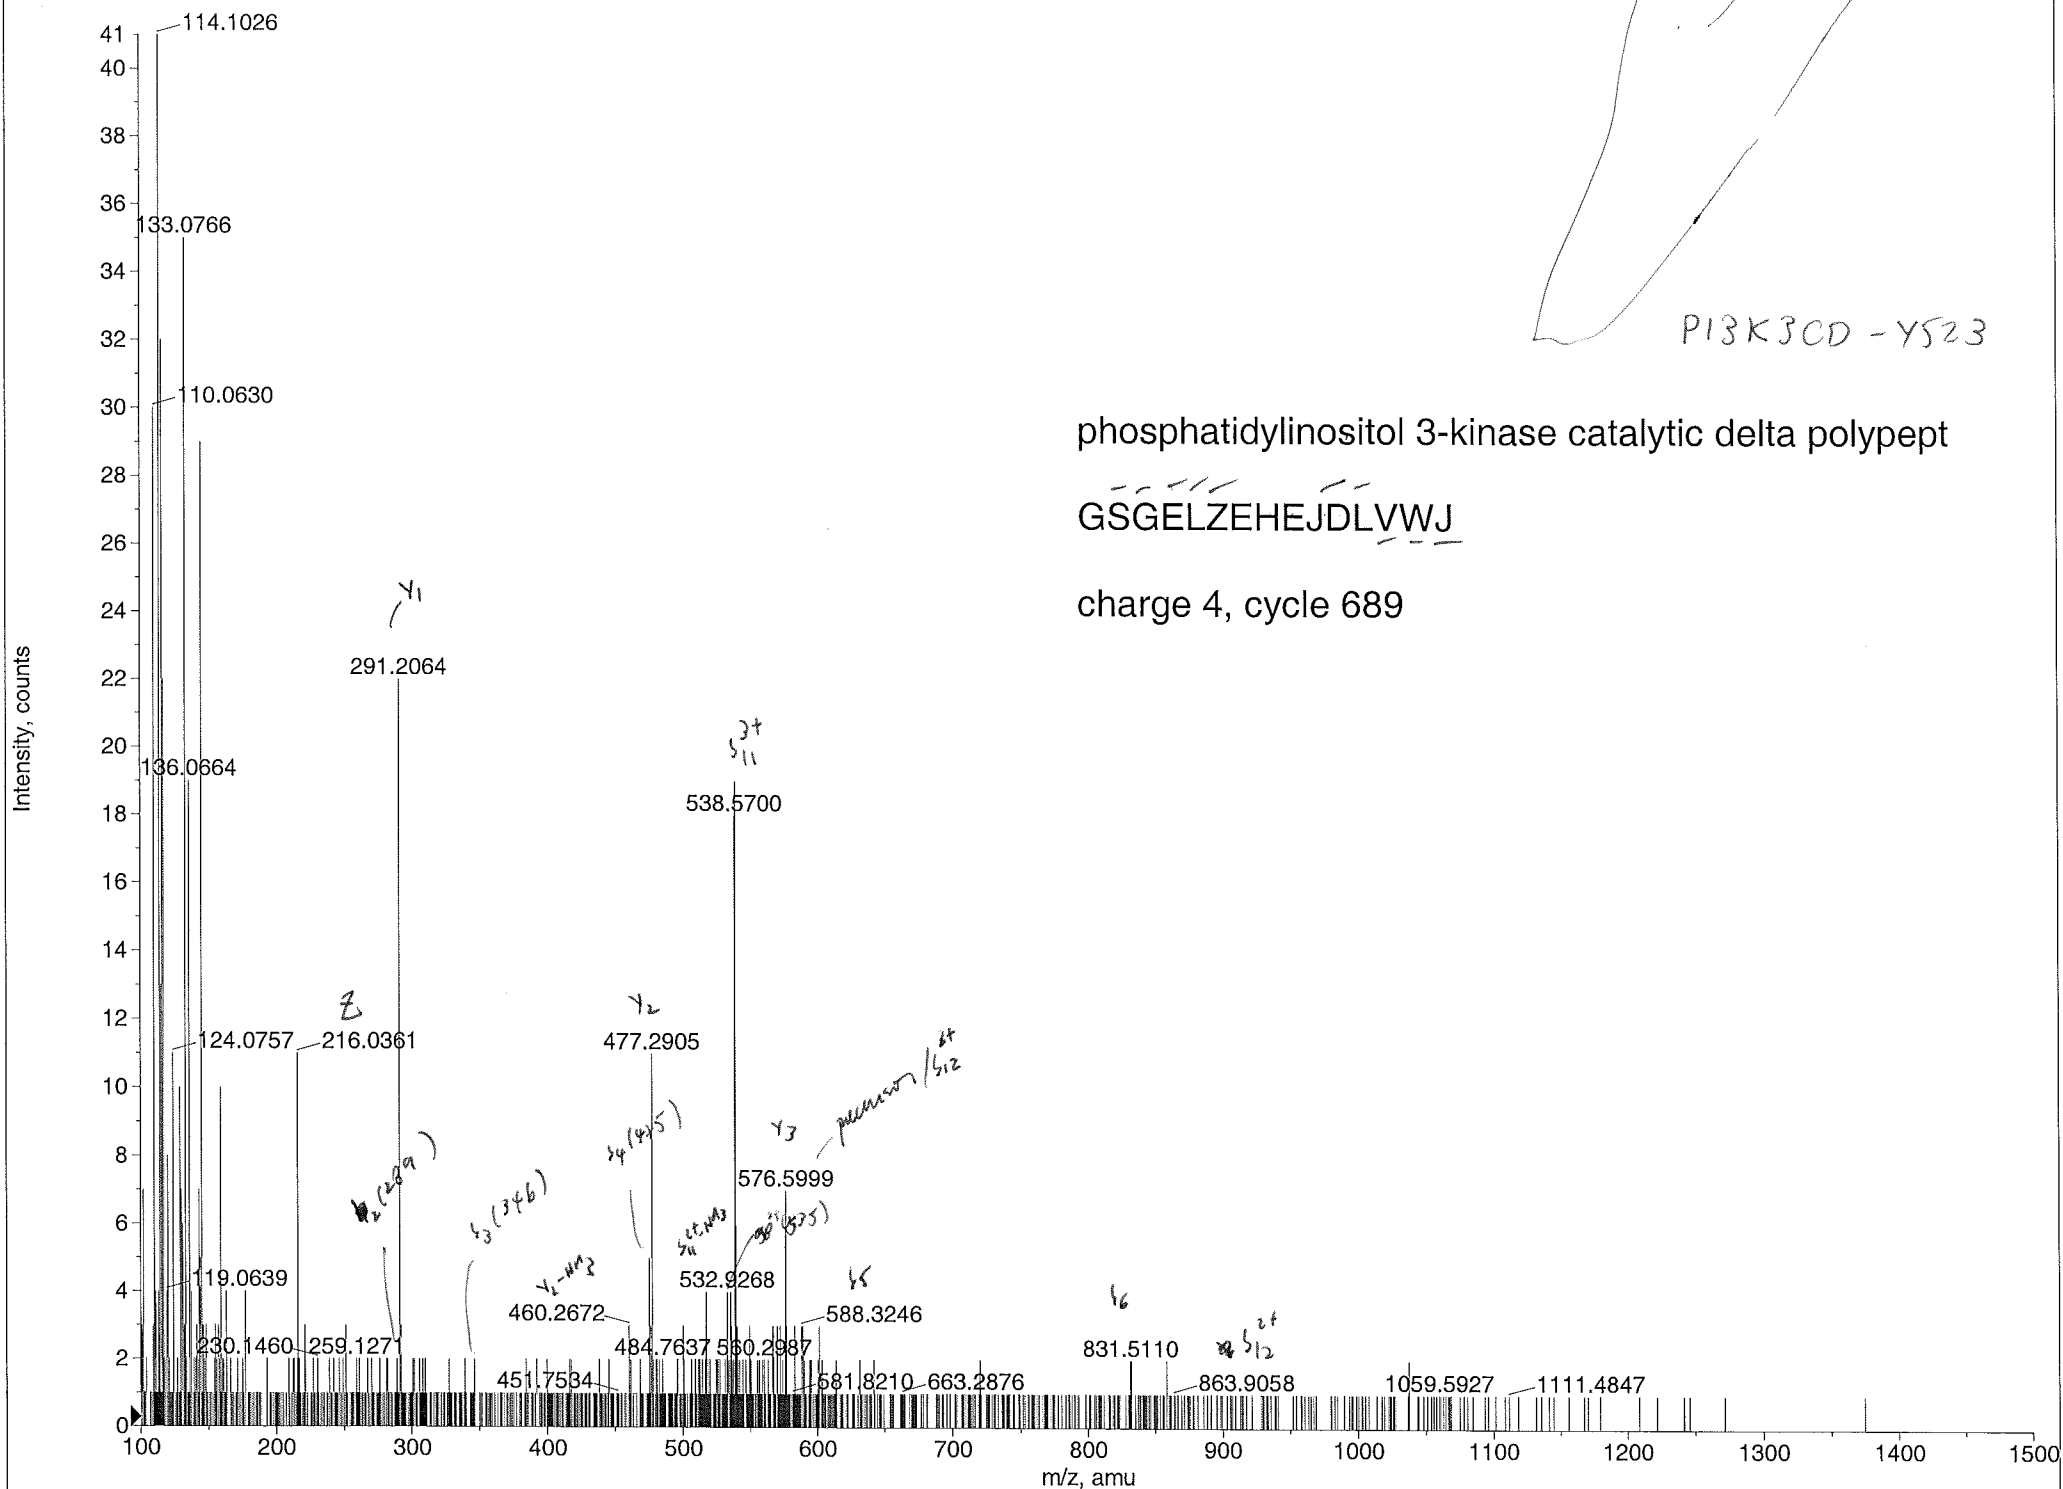



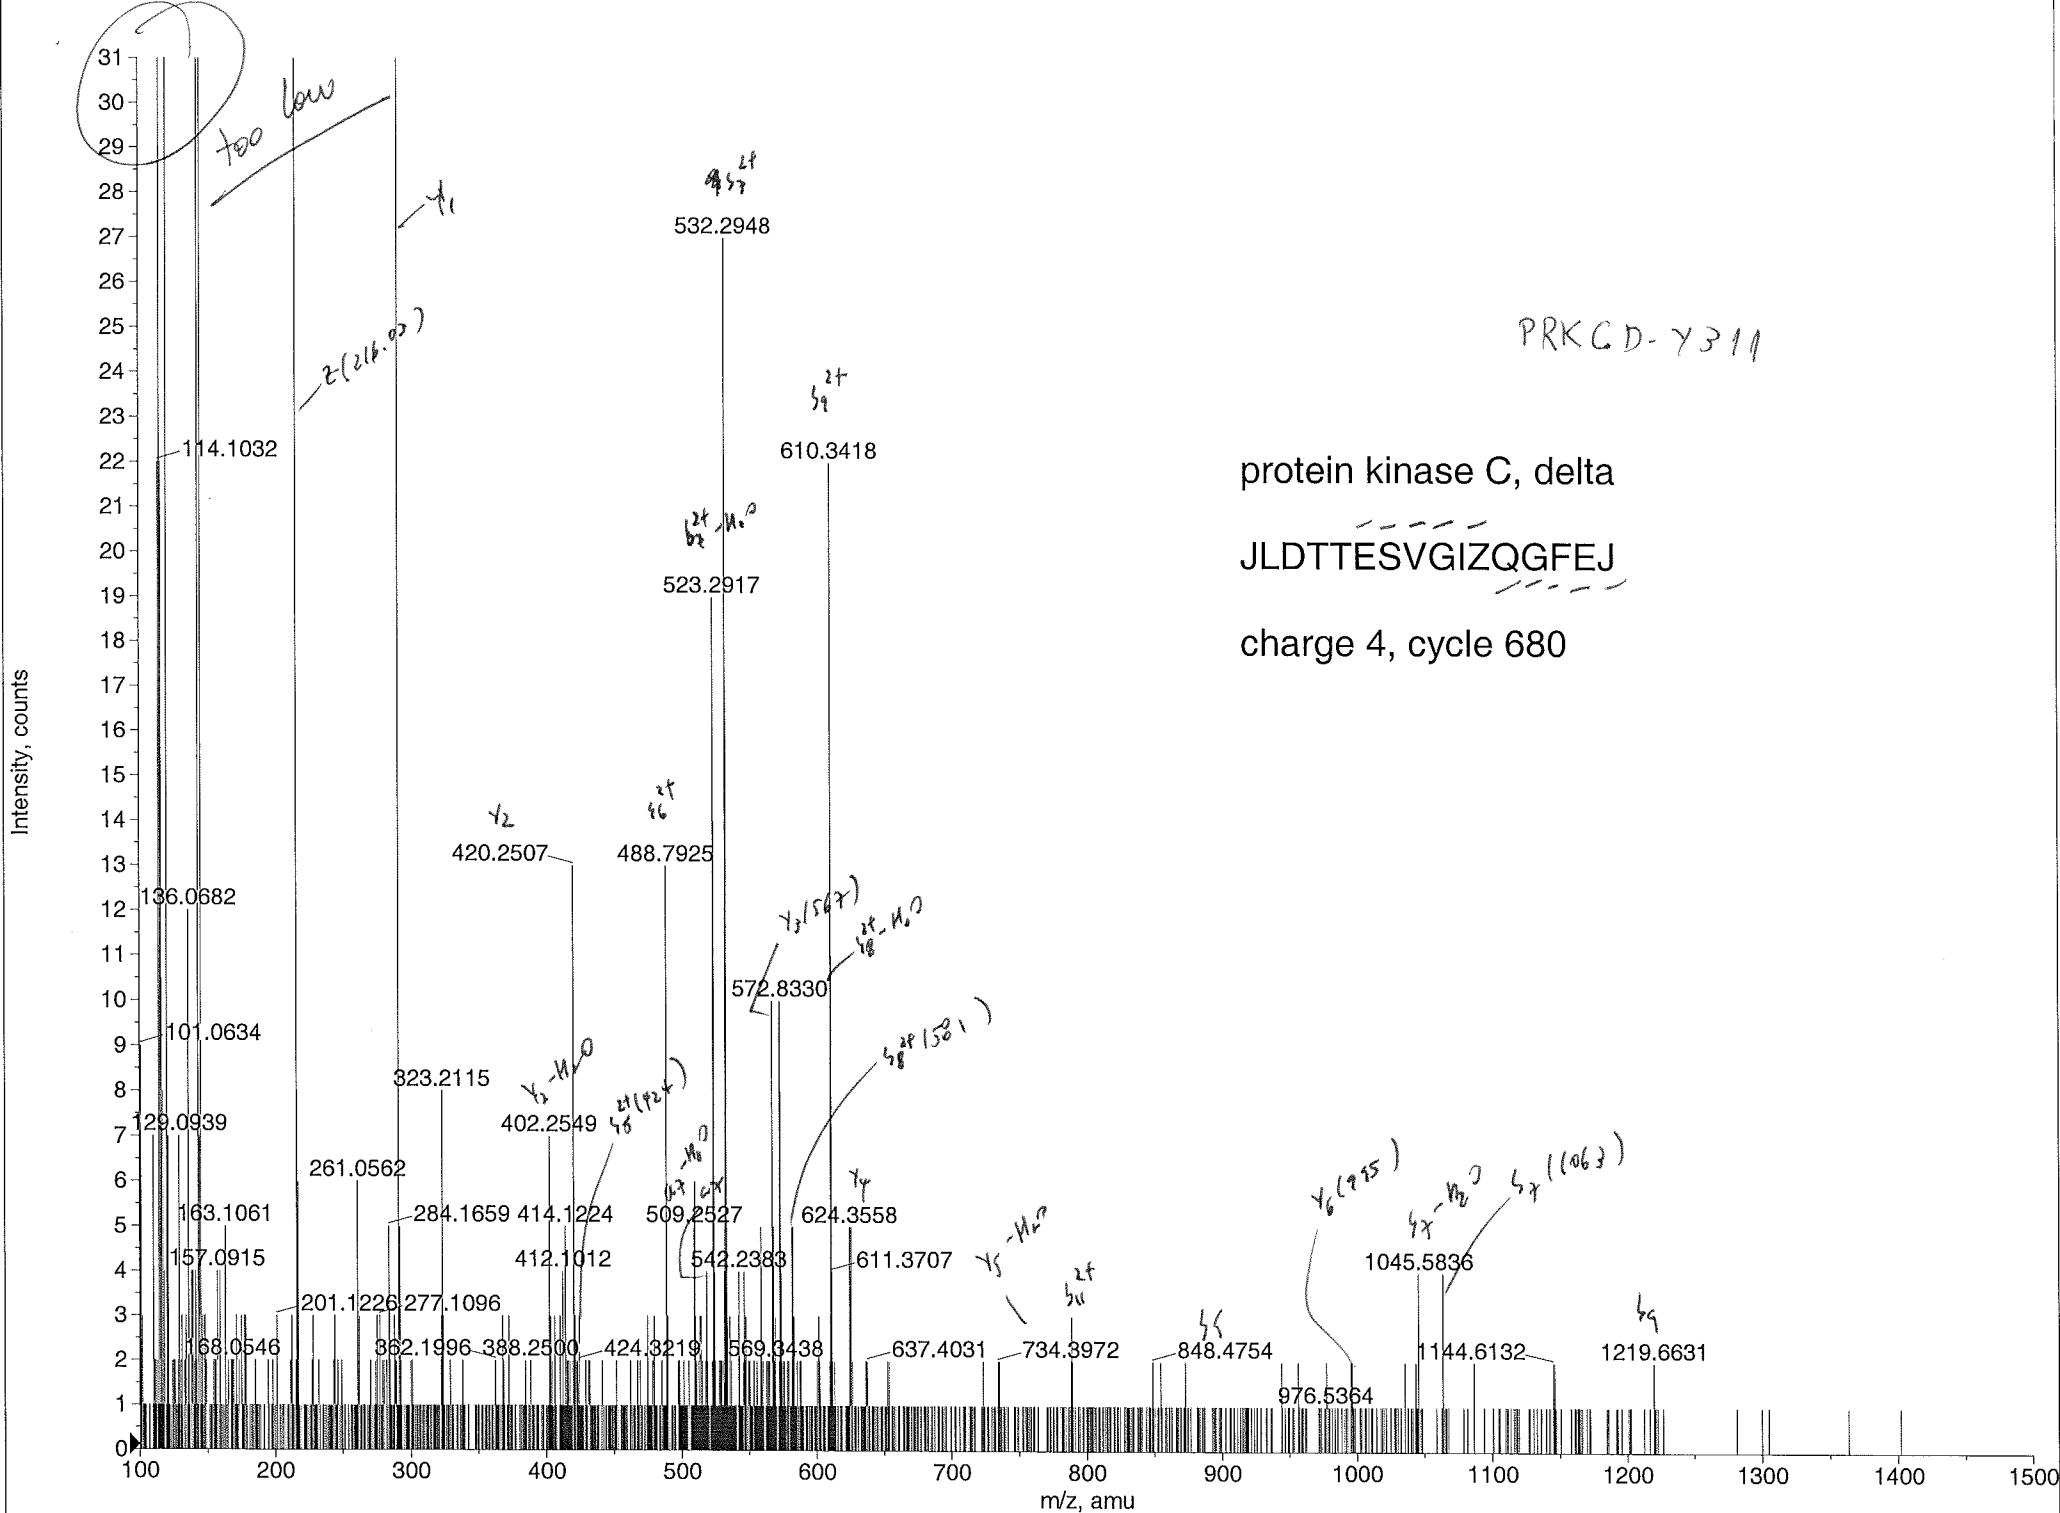

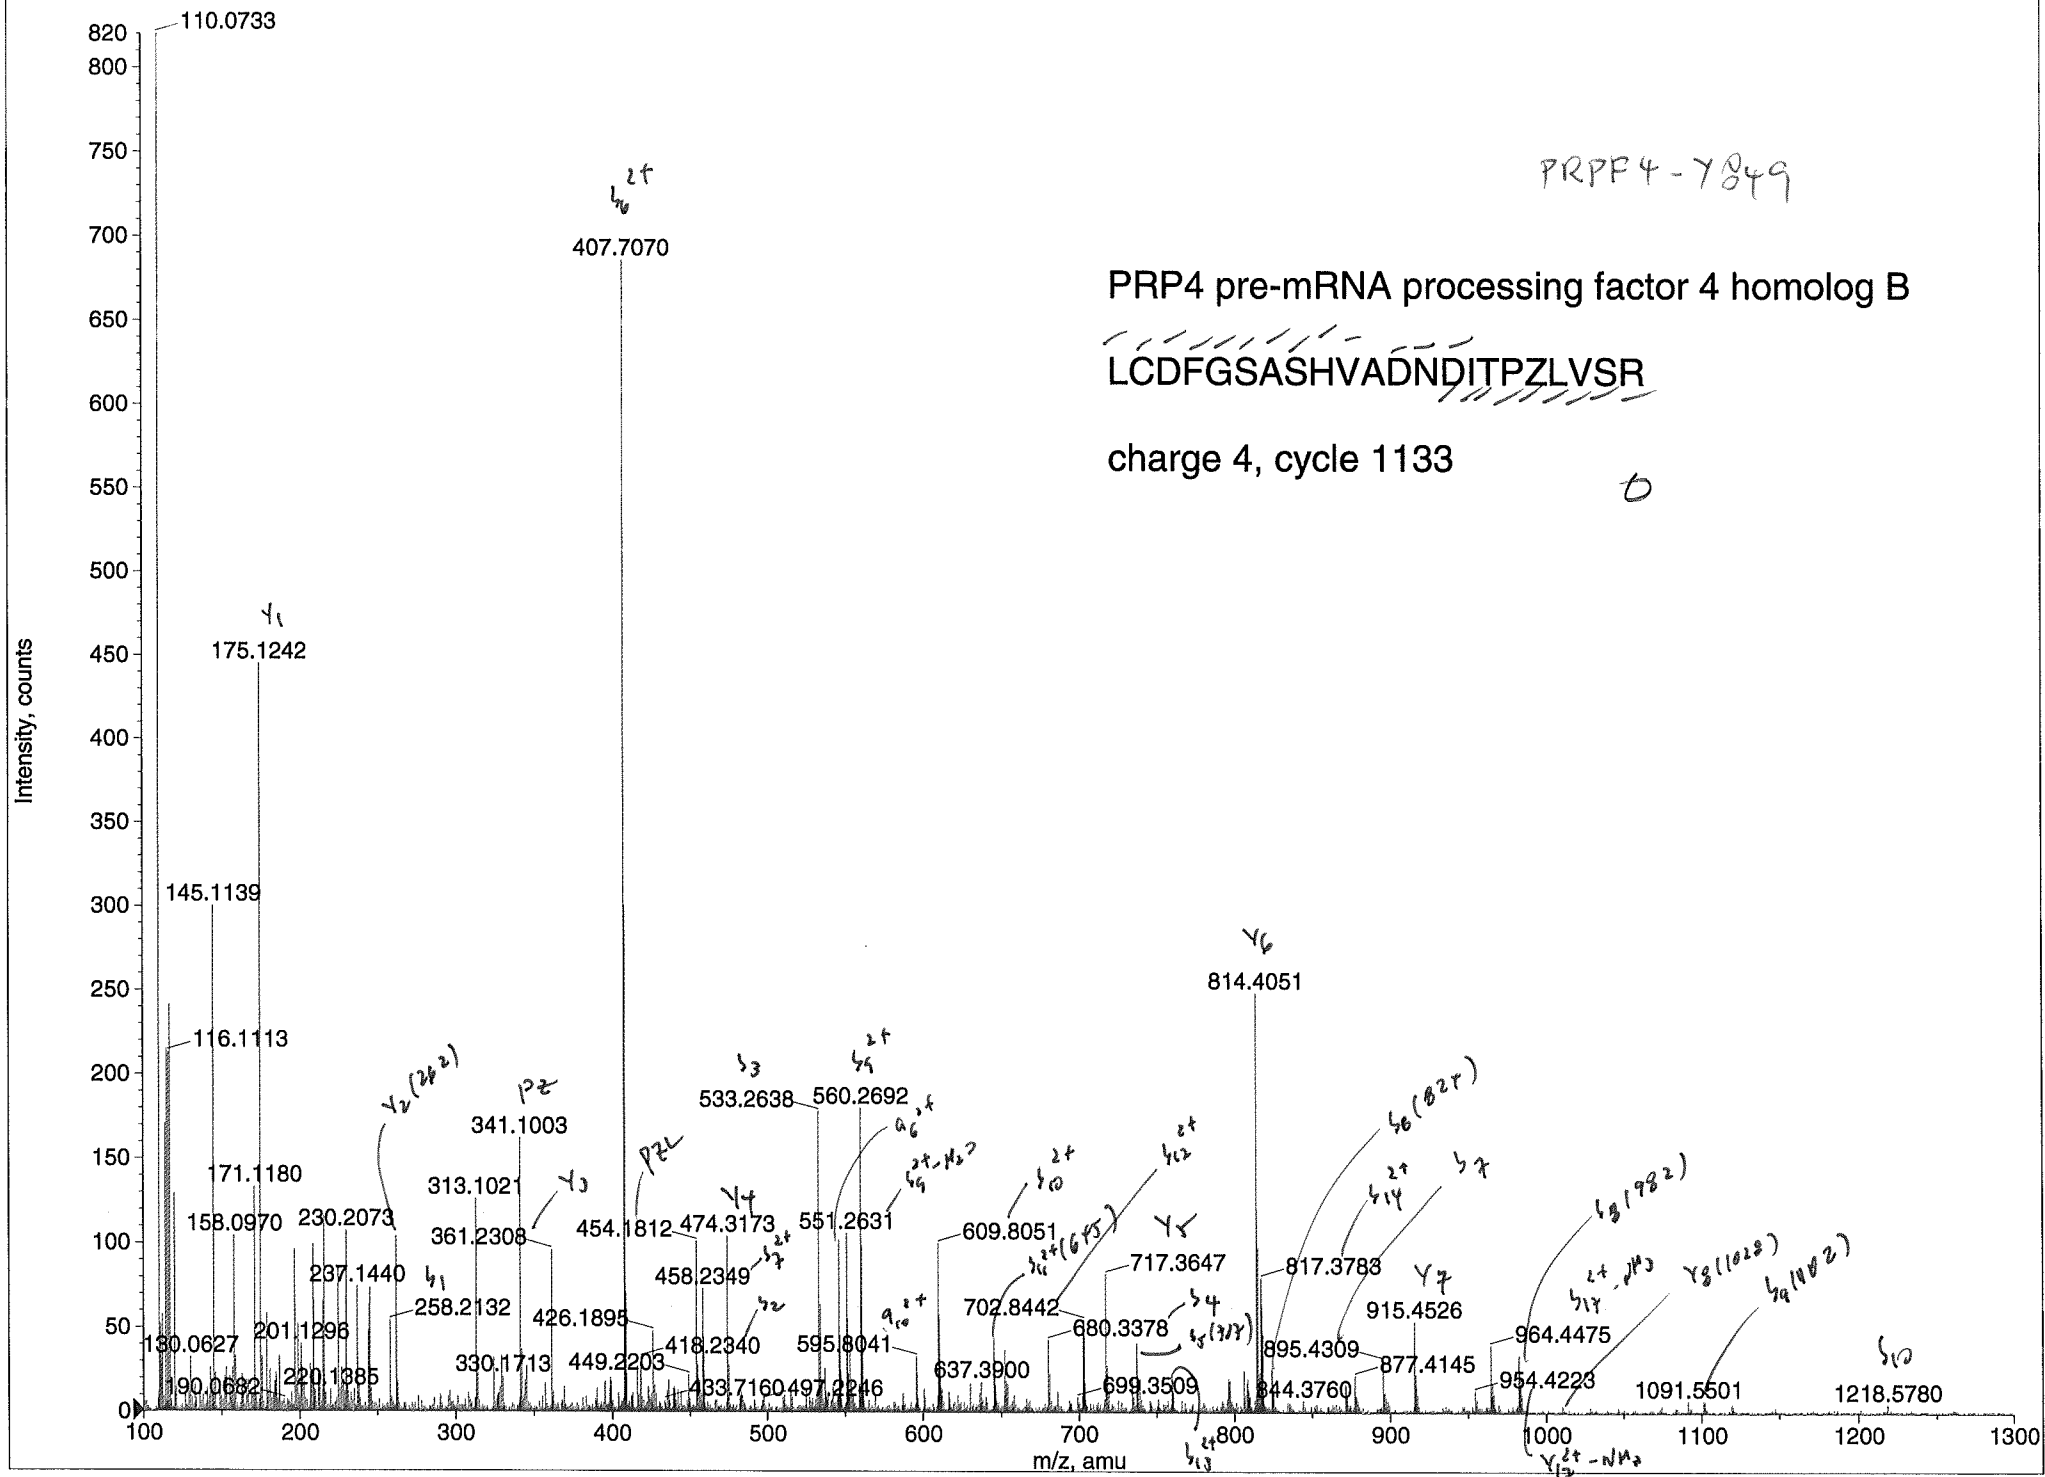

PRPF4-7849

PRP4 pre-mRNA processing factor 4 homolog B

LCDFGSASHVADNDITPZLVSR

charge 4, cycle 1133

o

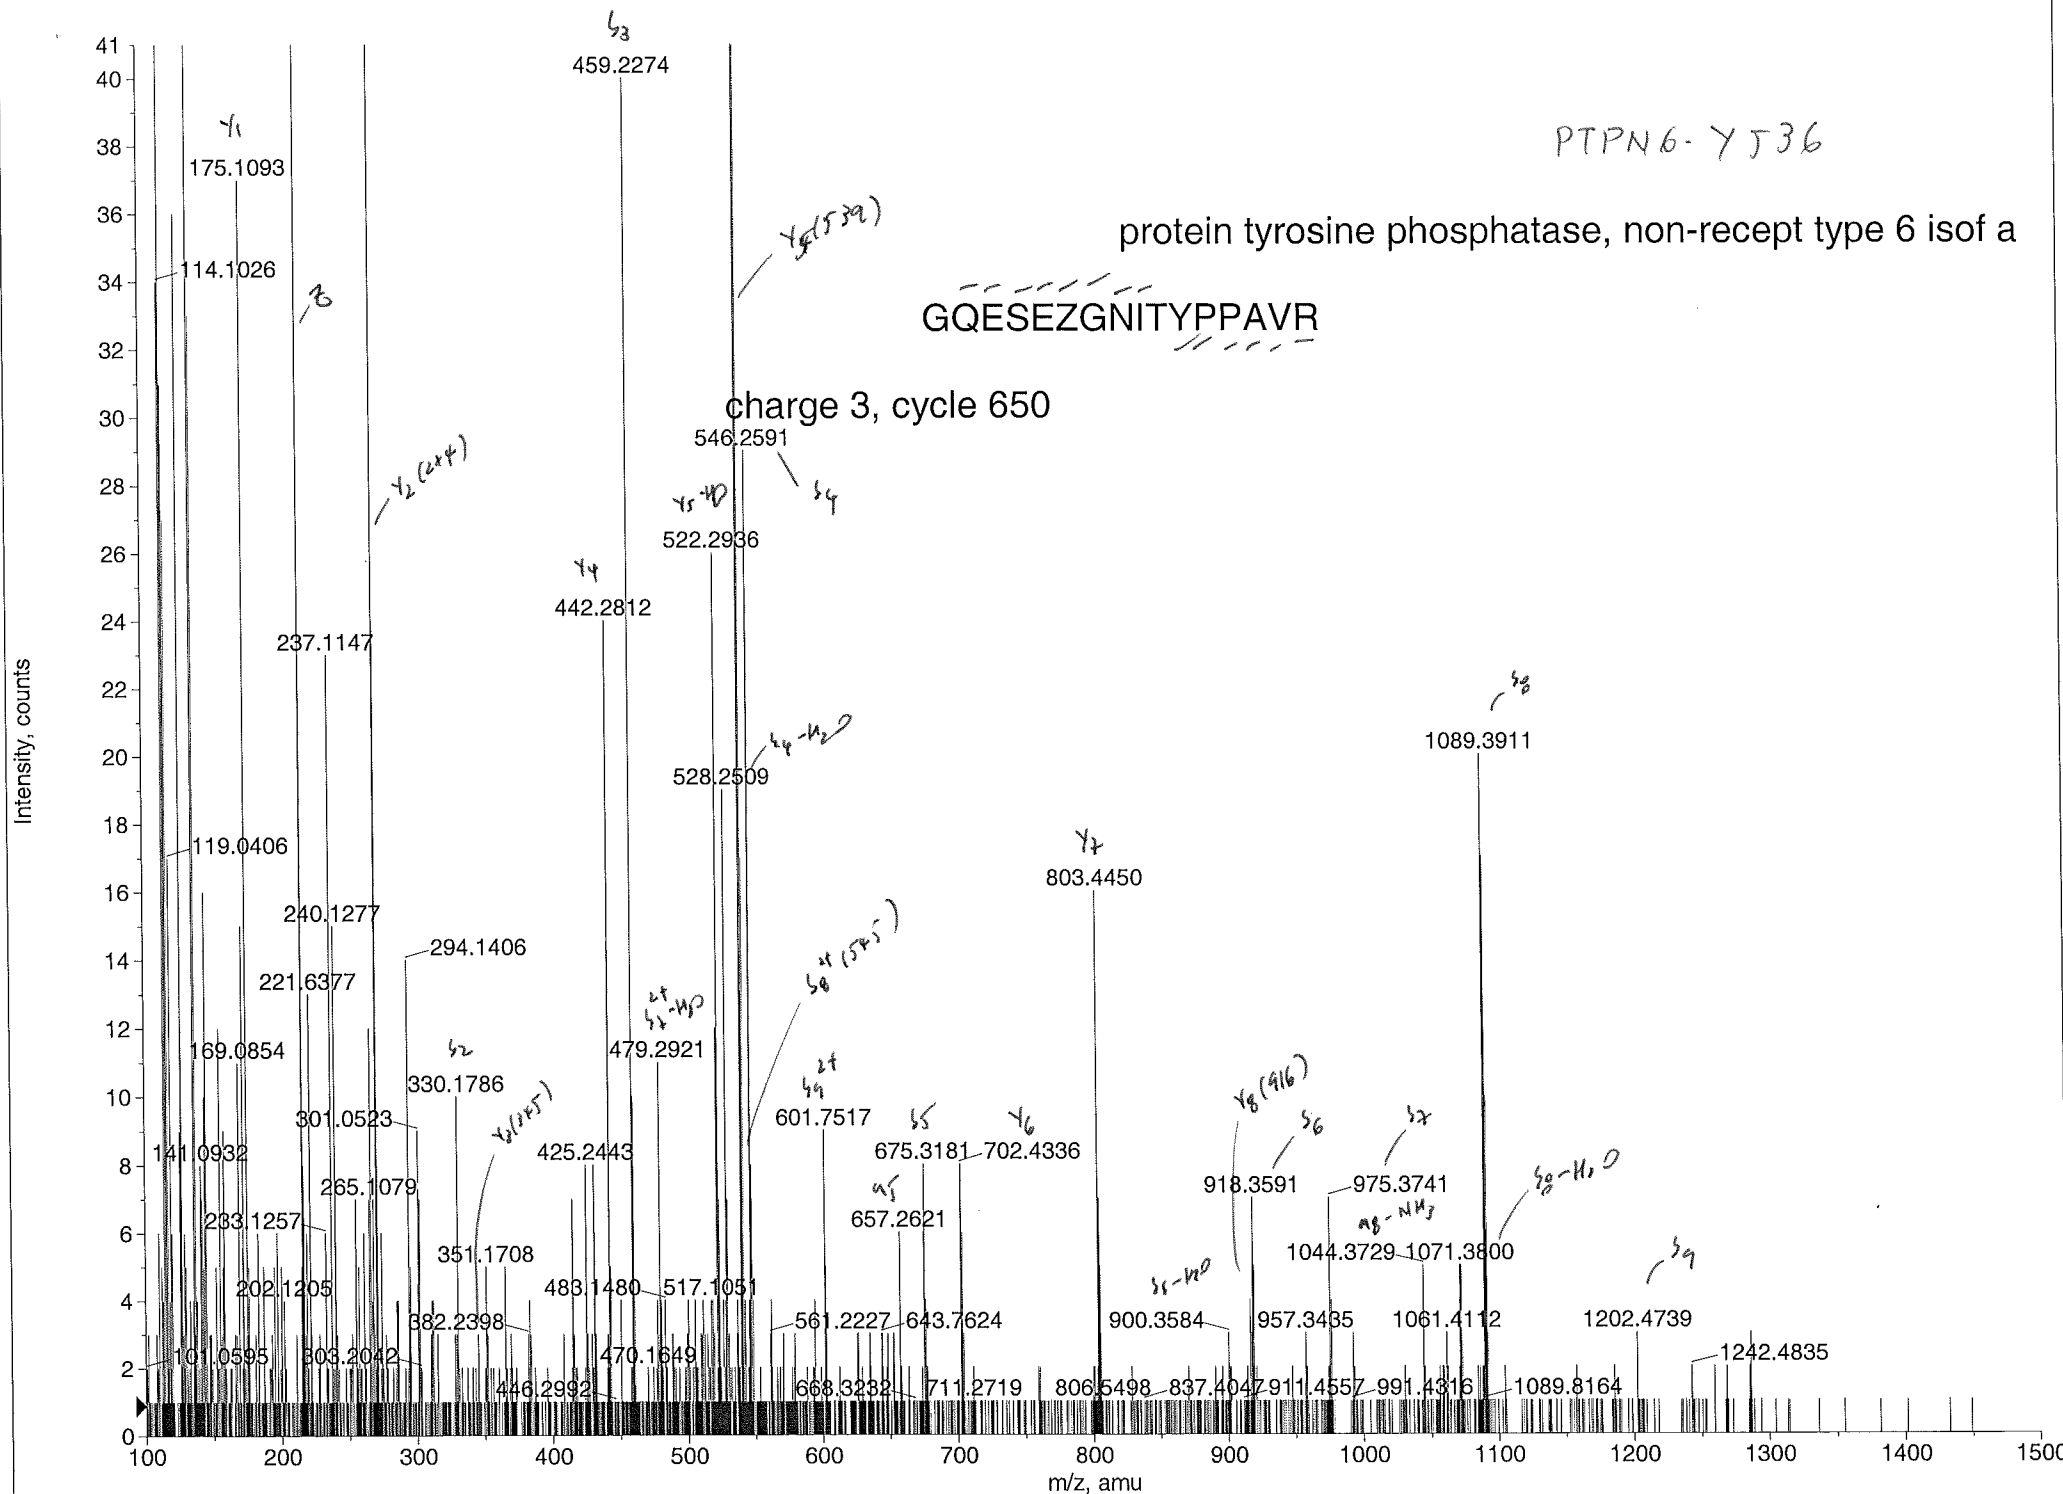

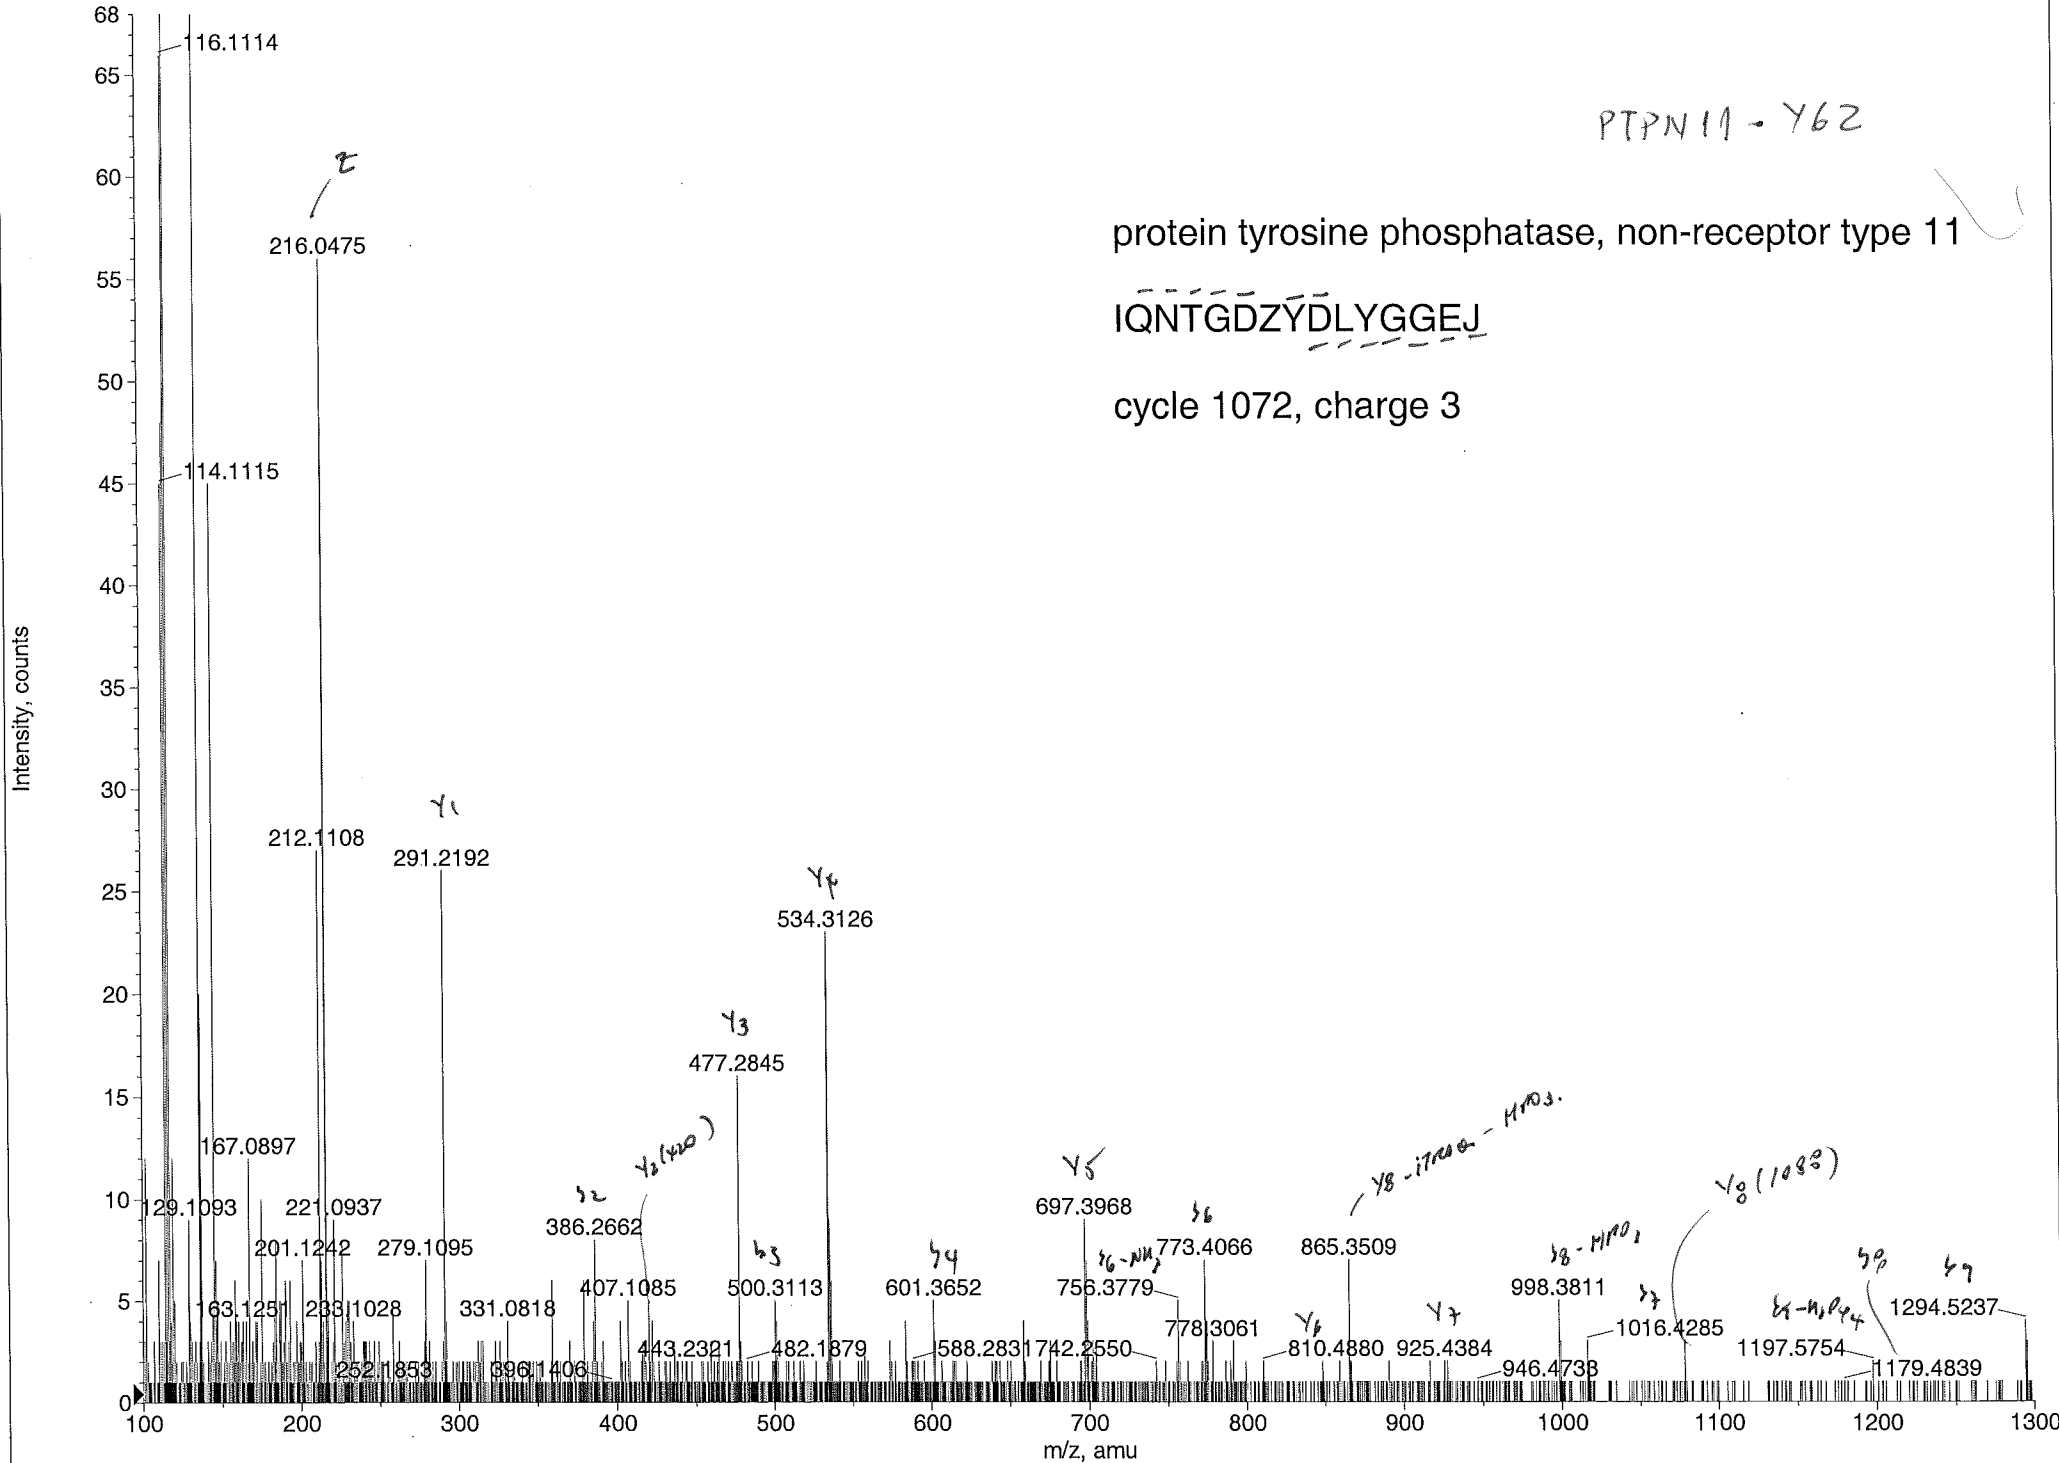

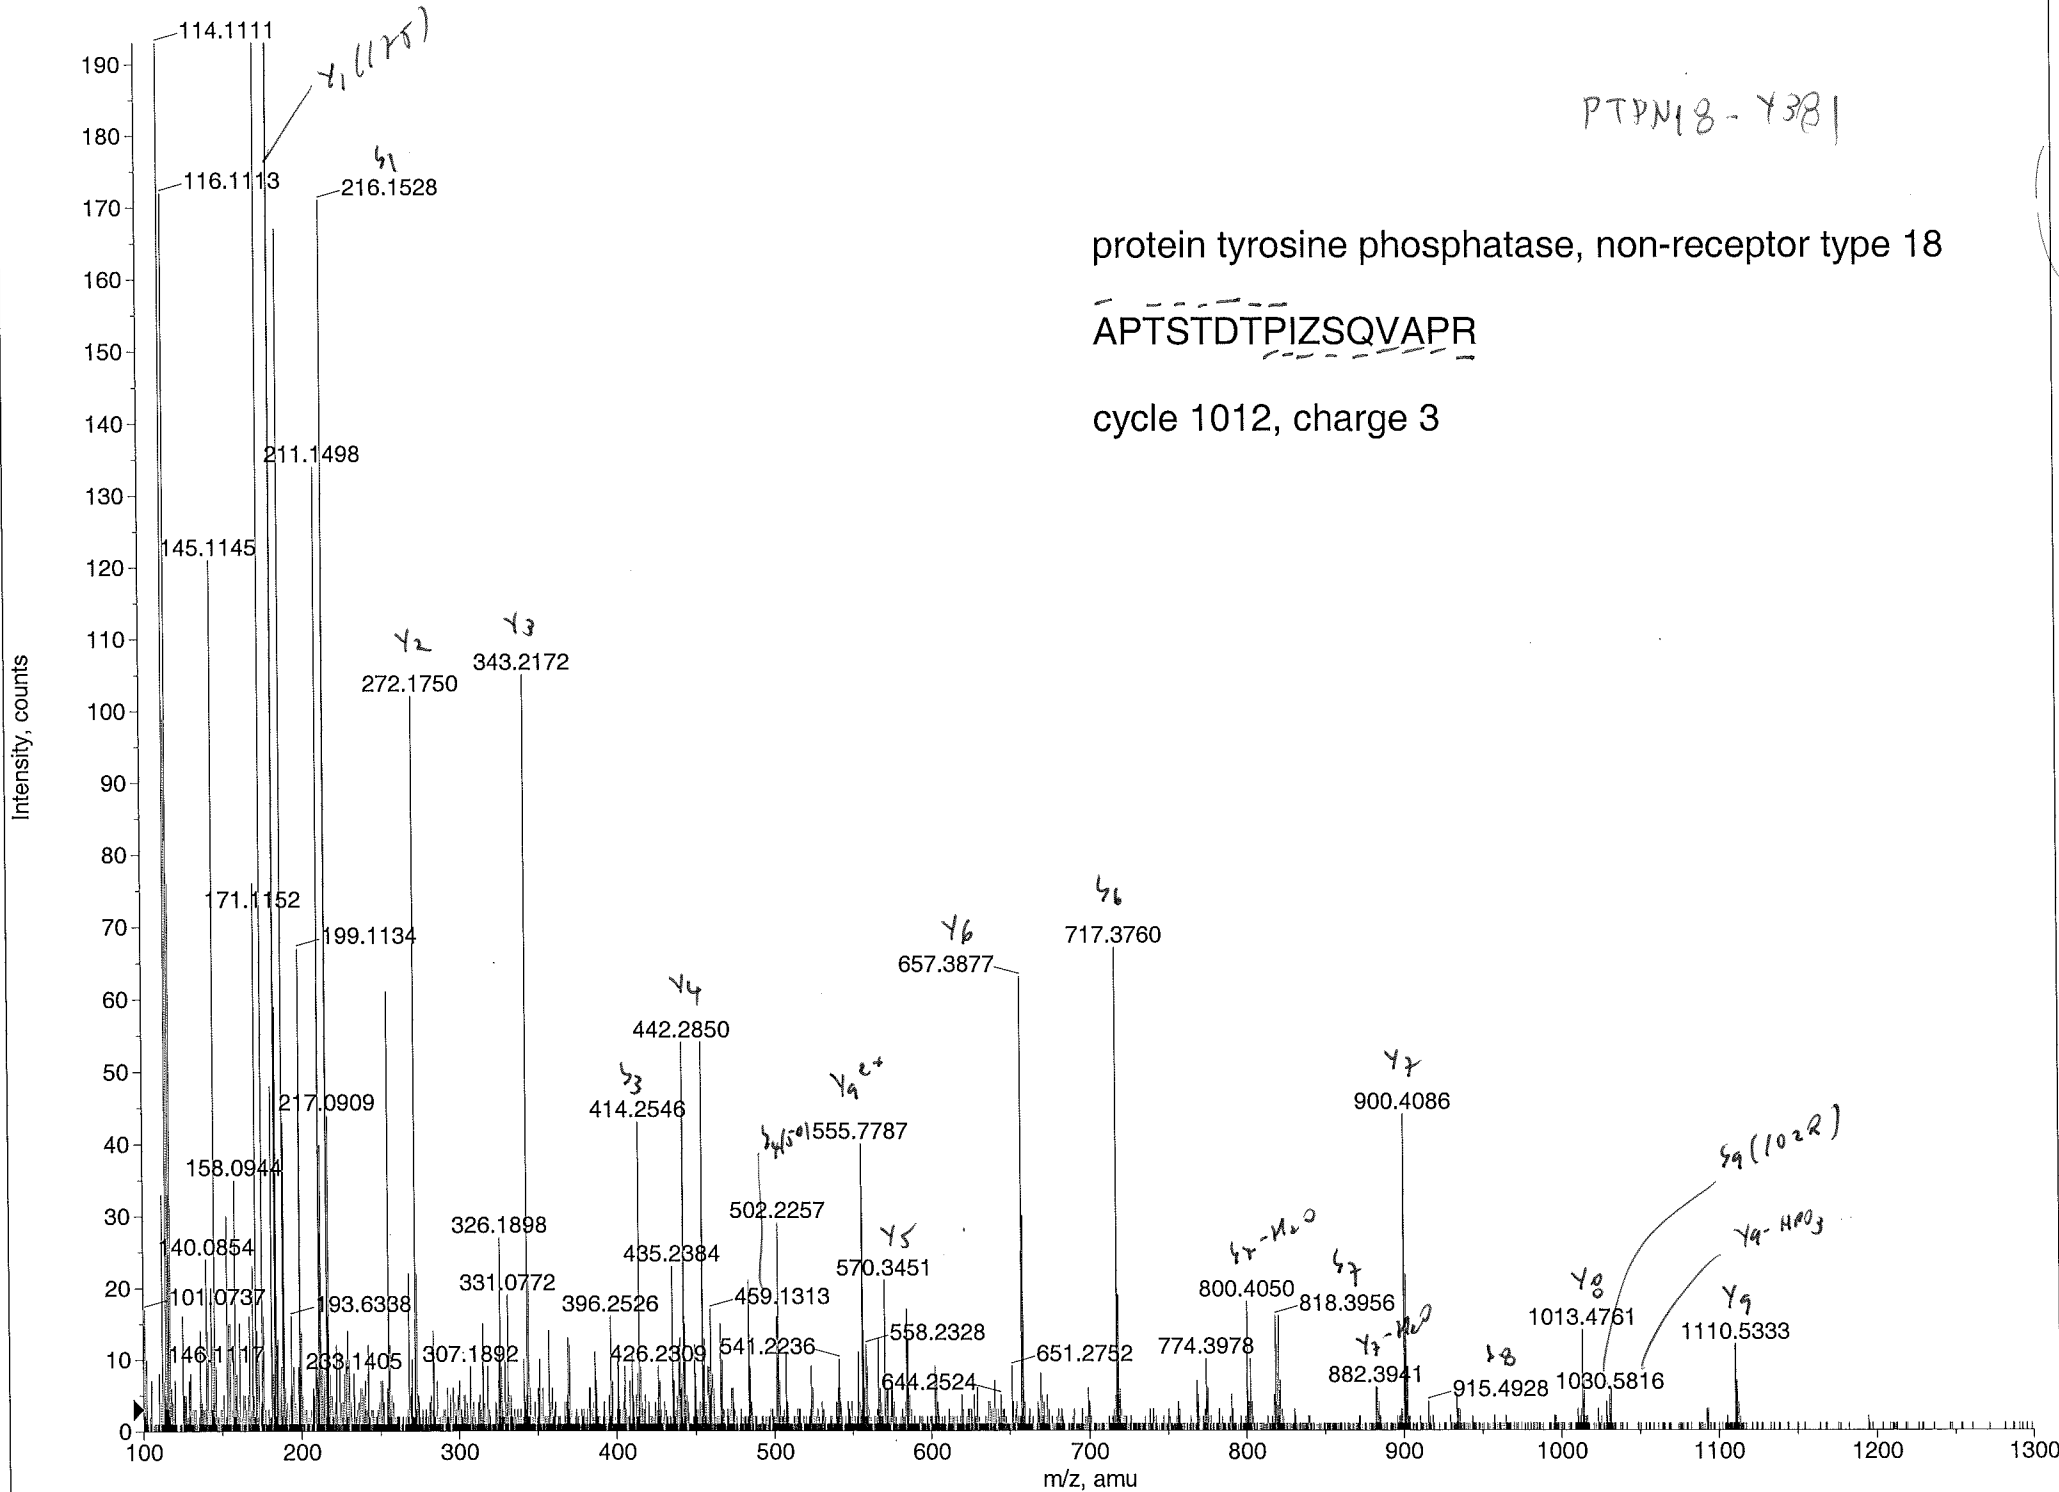

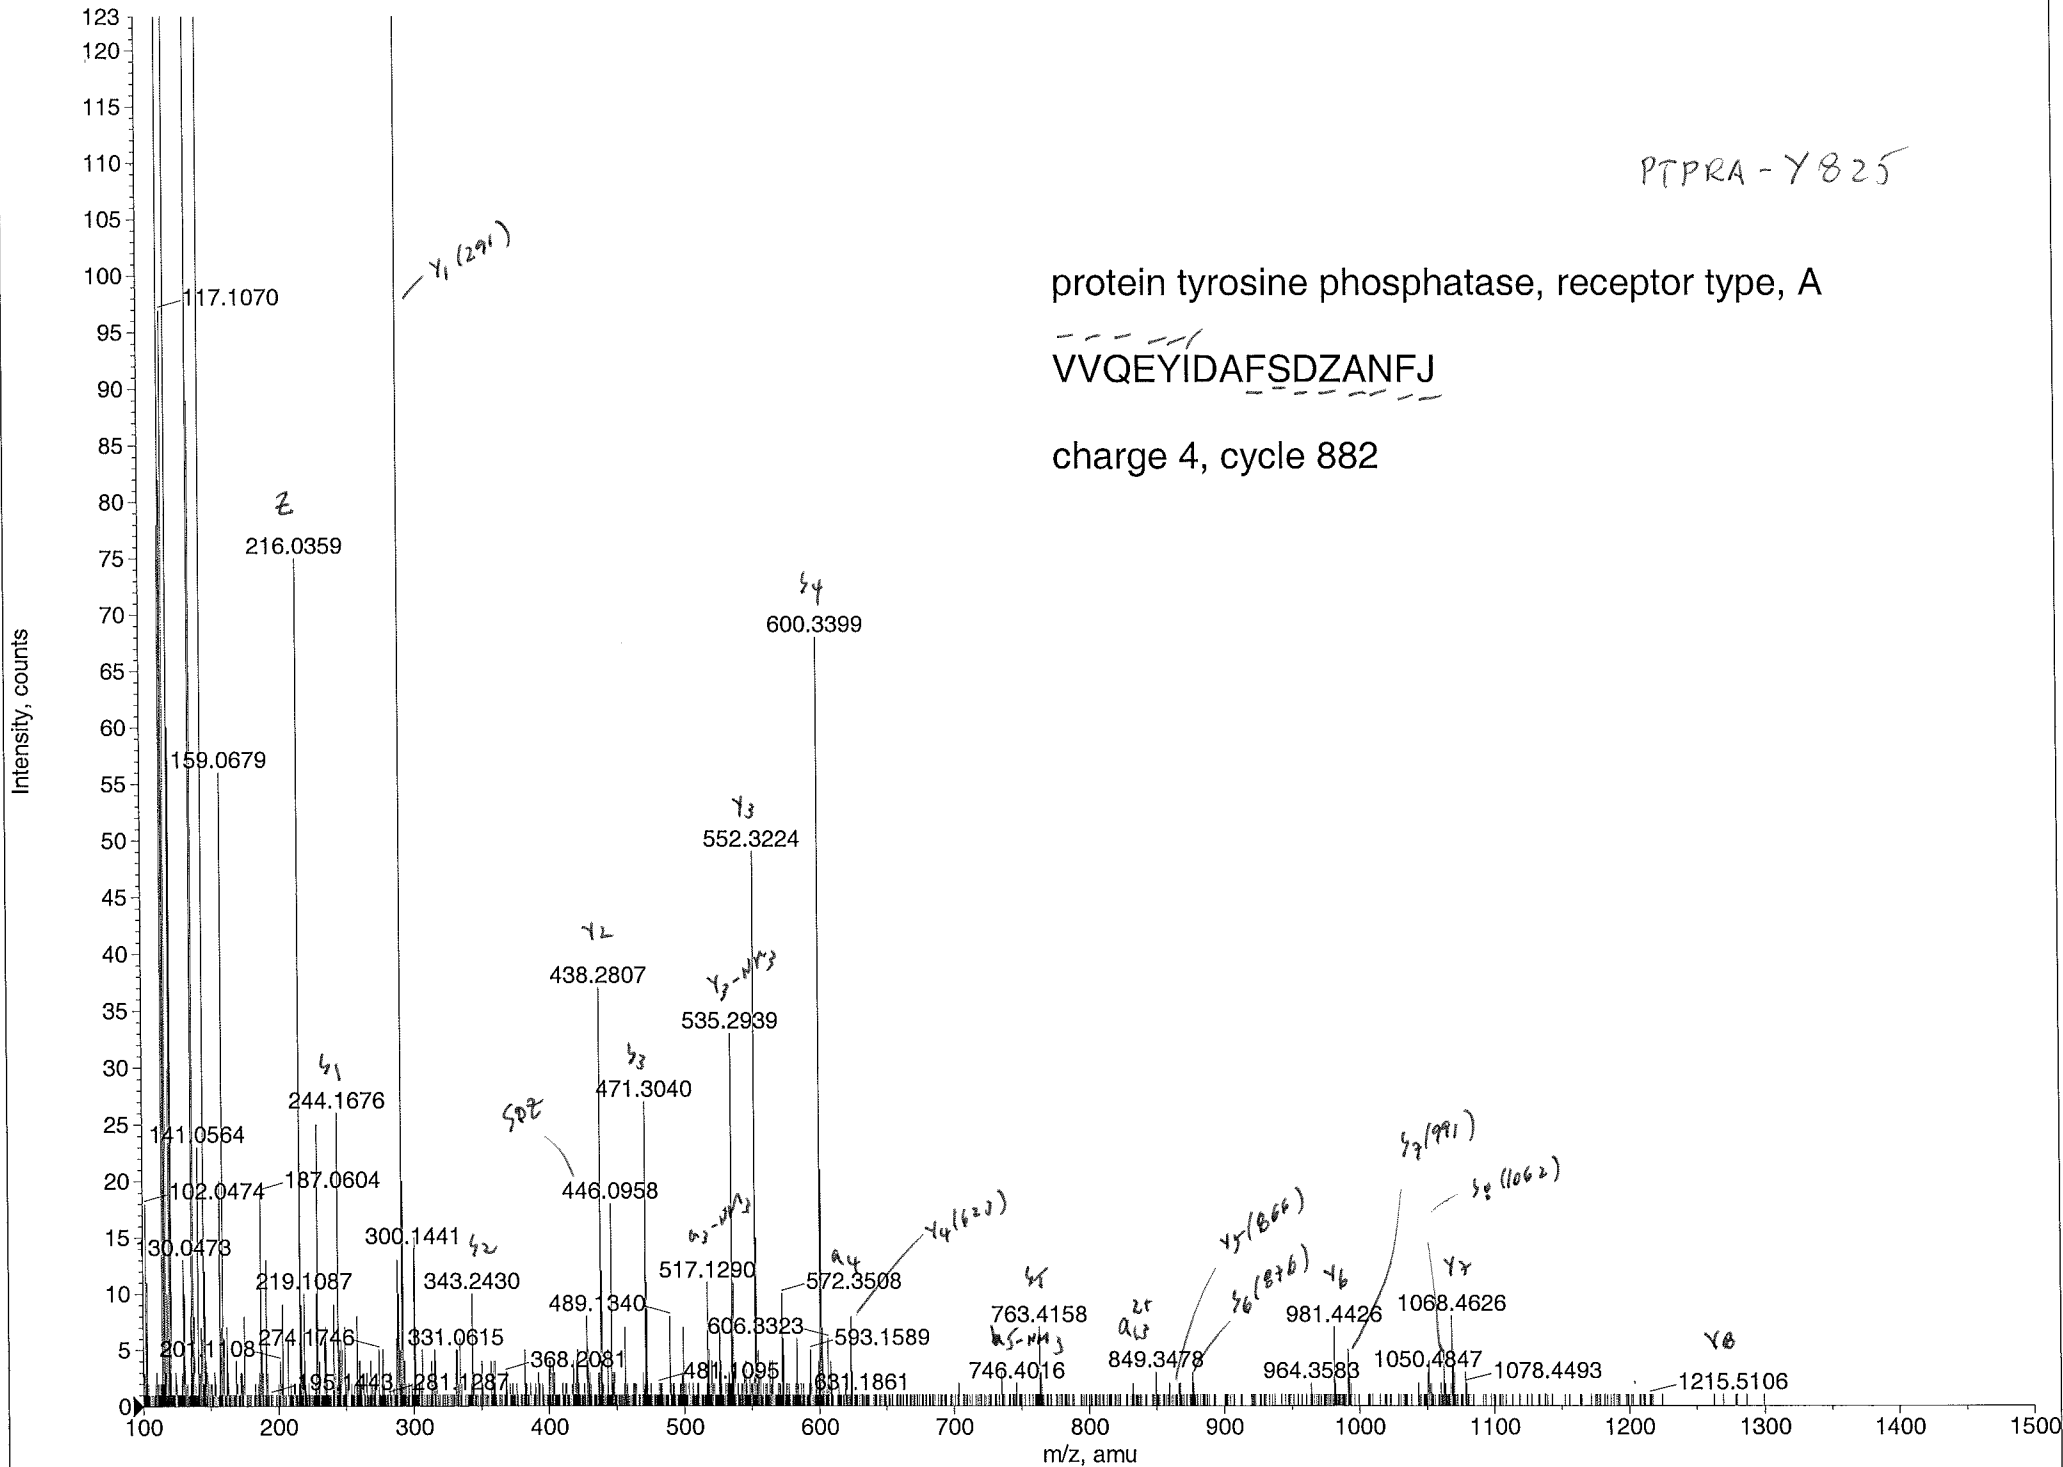



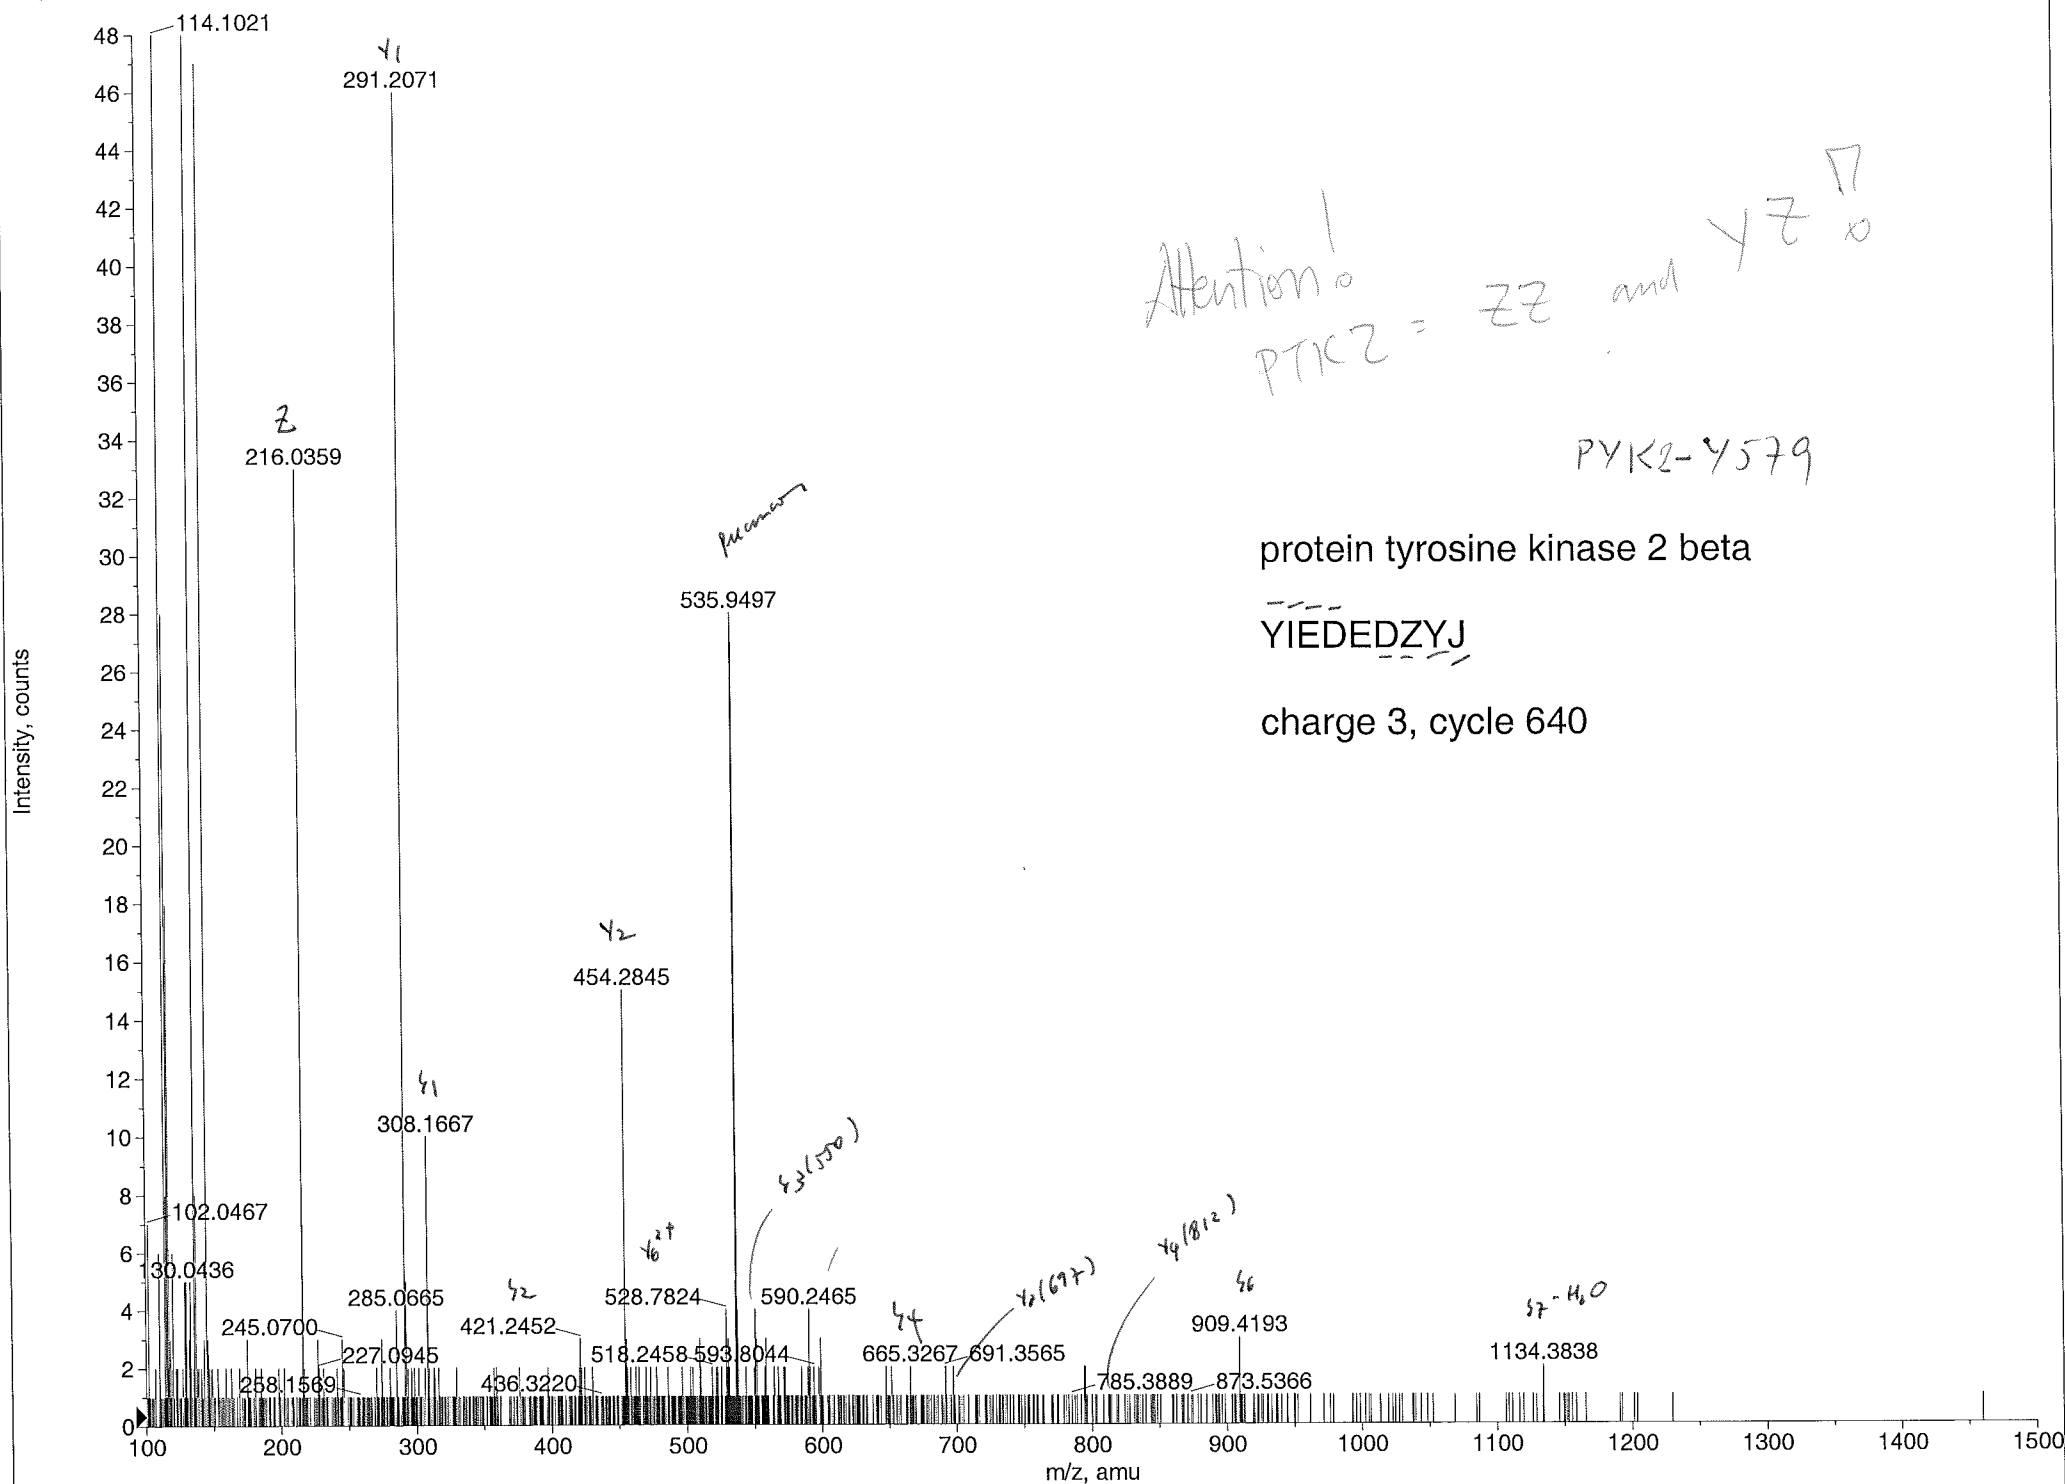

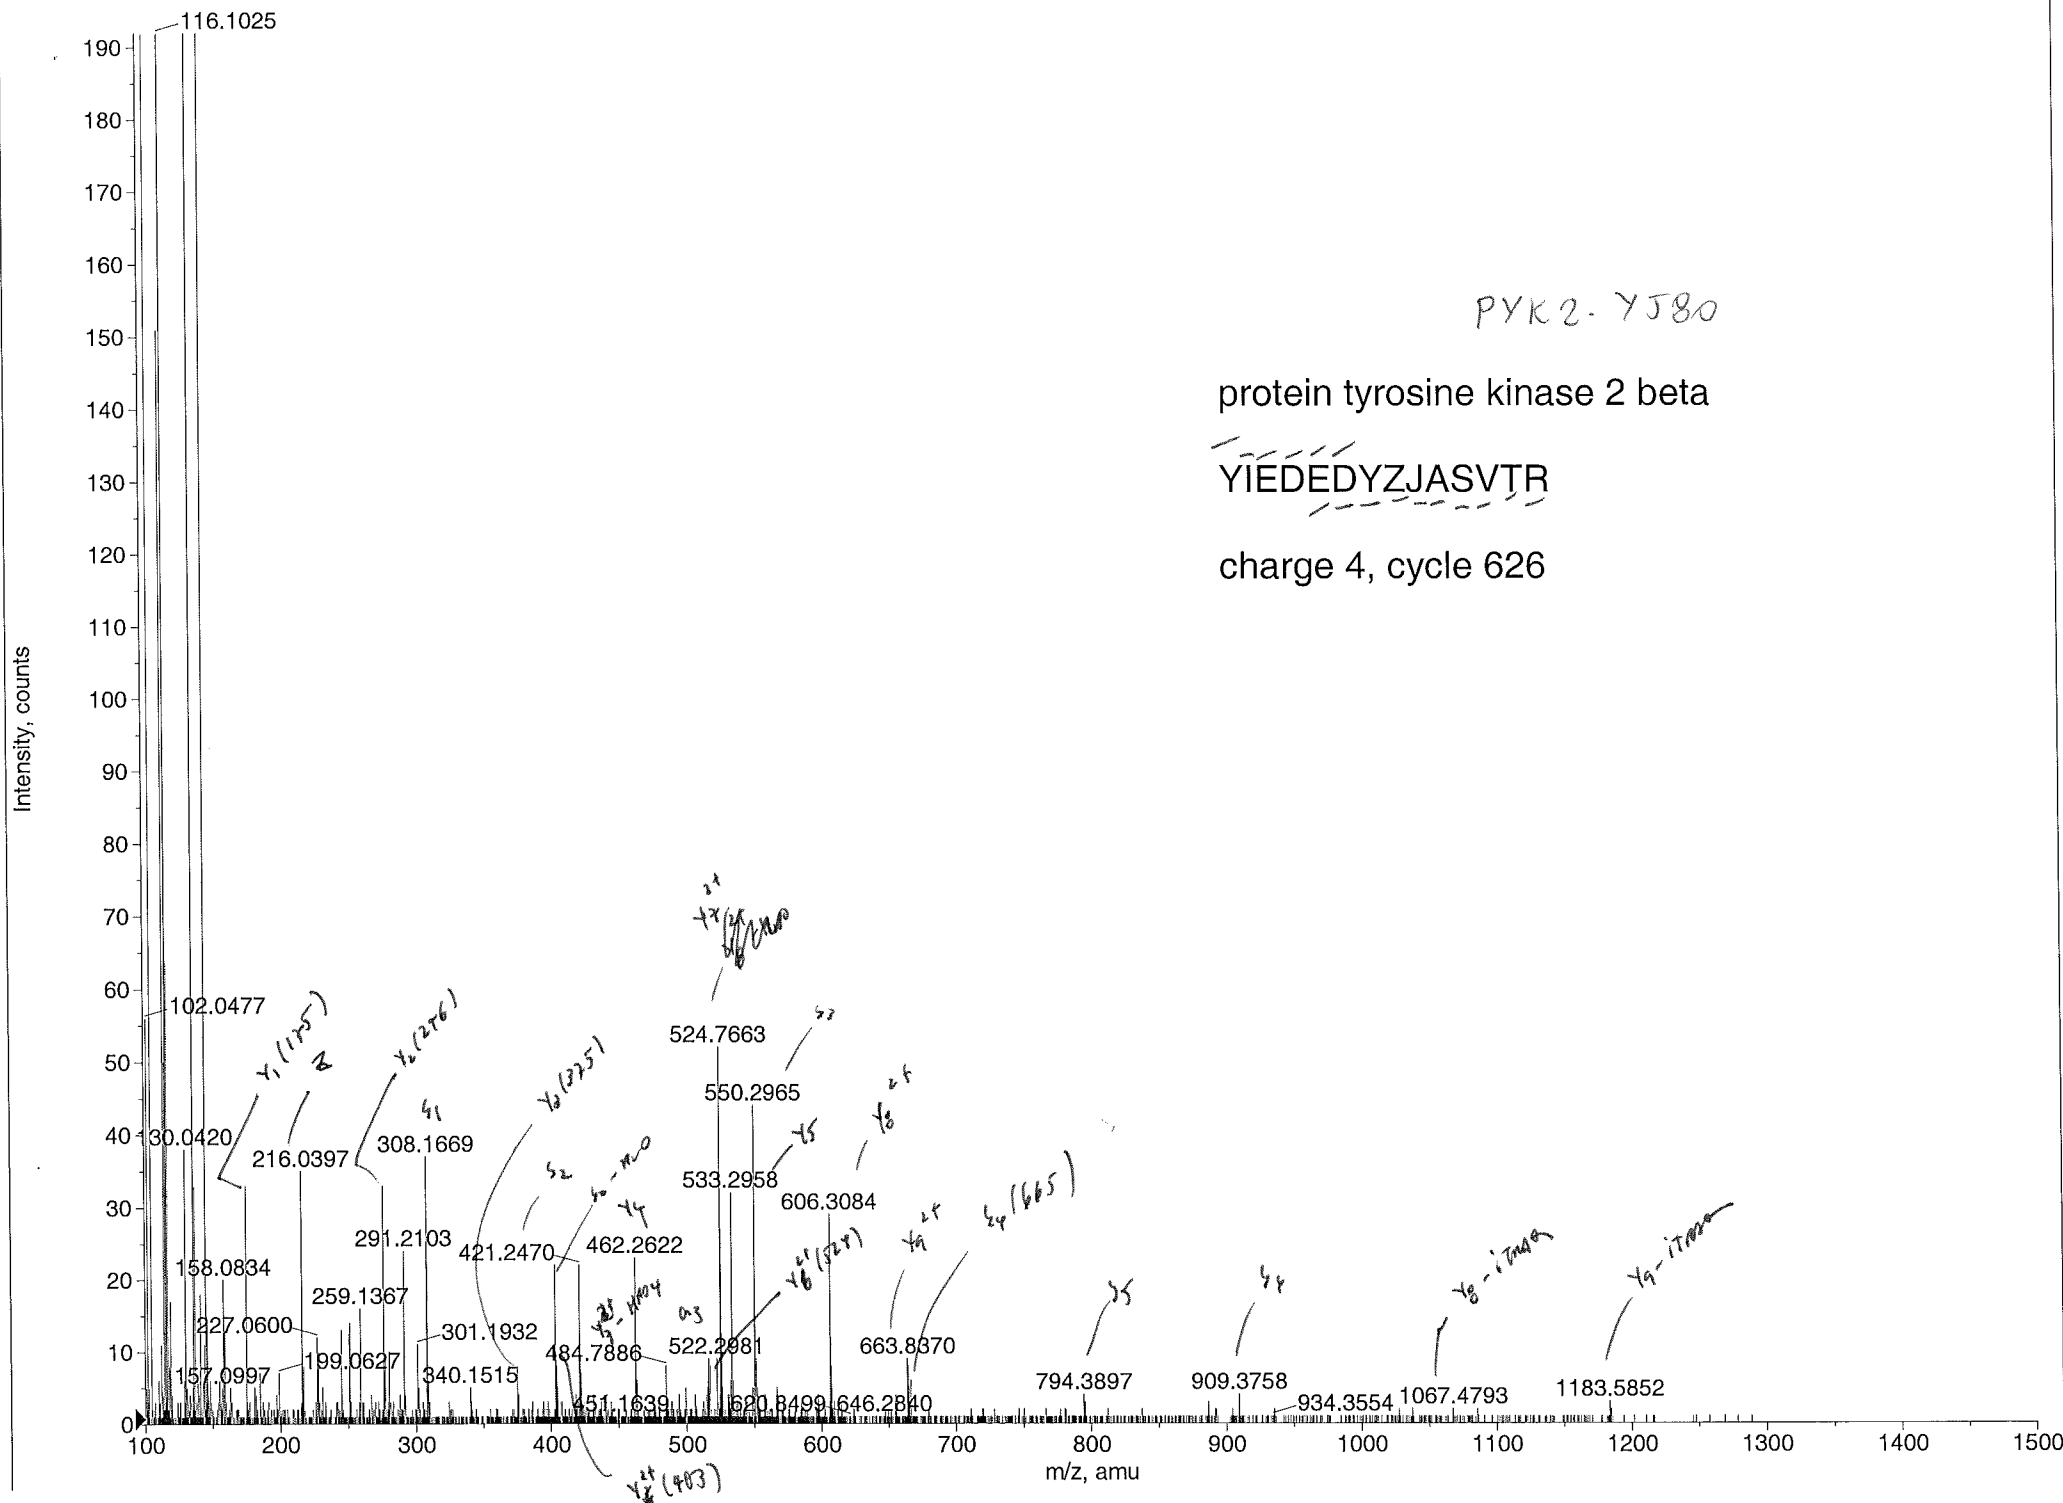

PYK2-Y580

protein tyrosine kinase 2 beta

YIEDEDYZJASVTR

charge 4, cycle 626

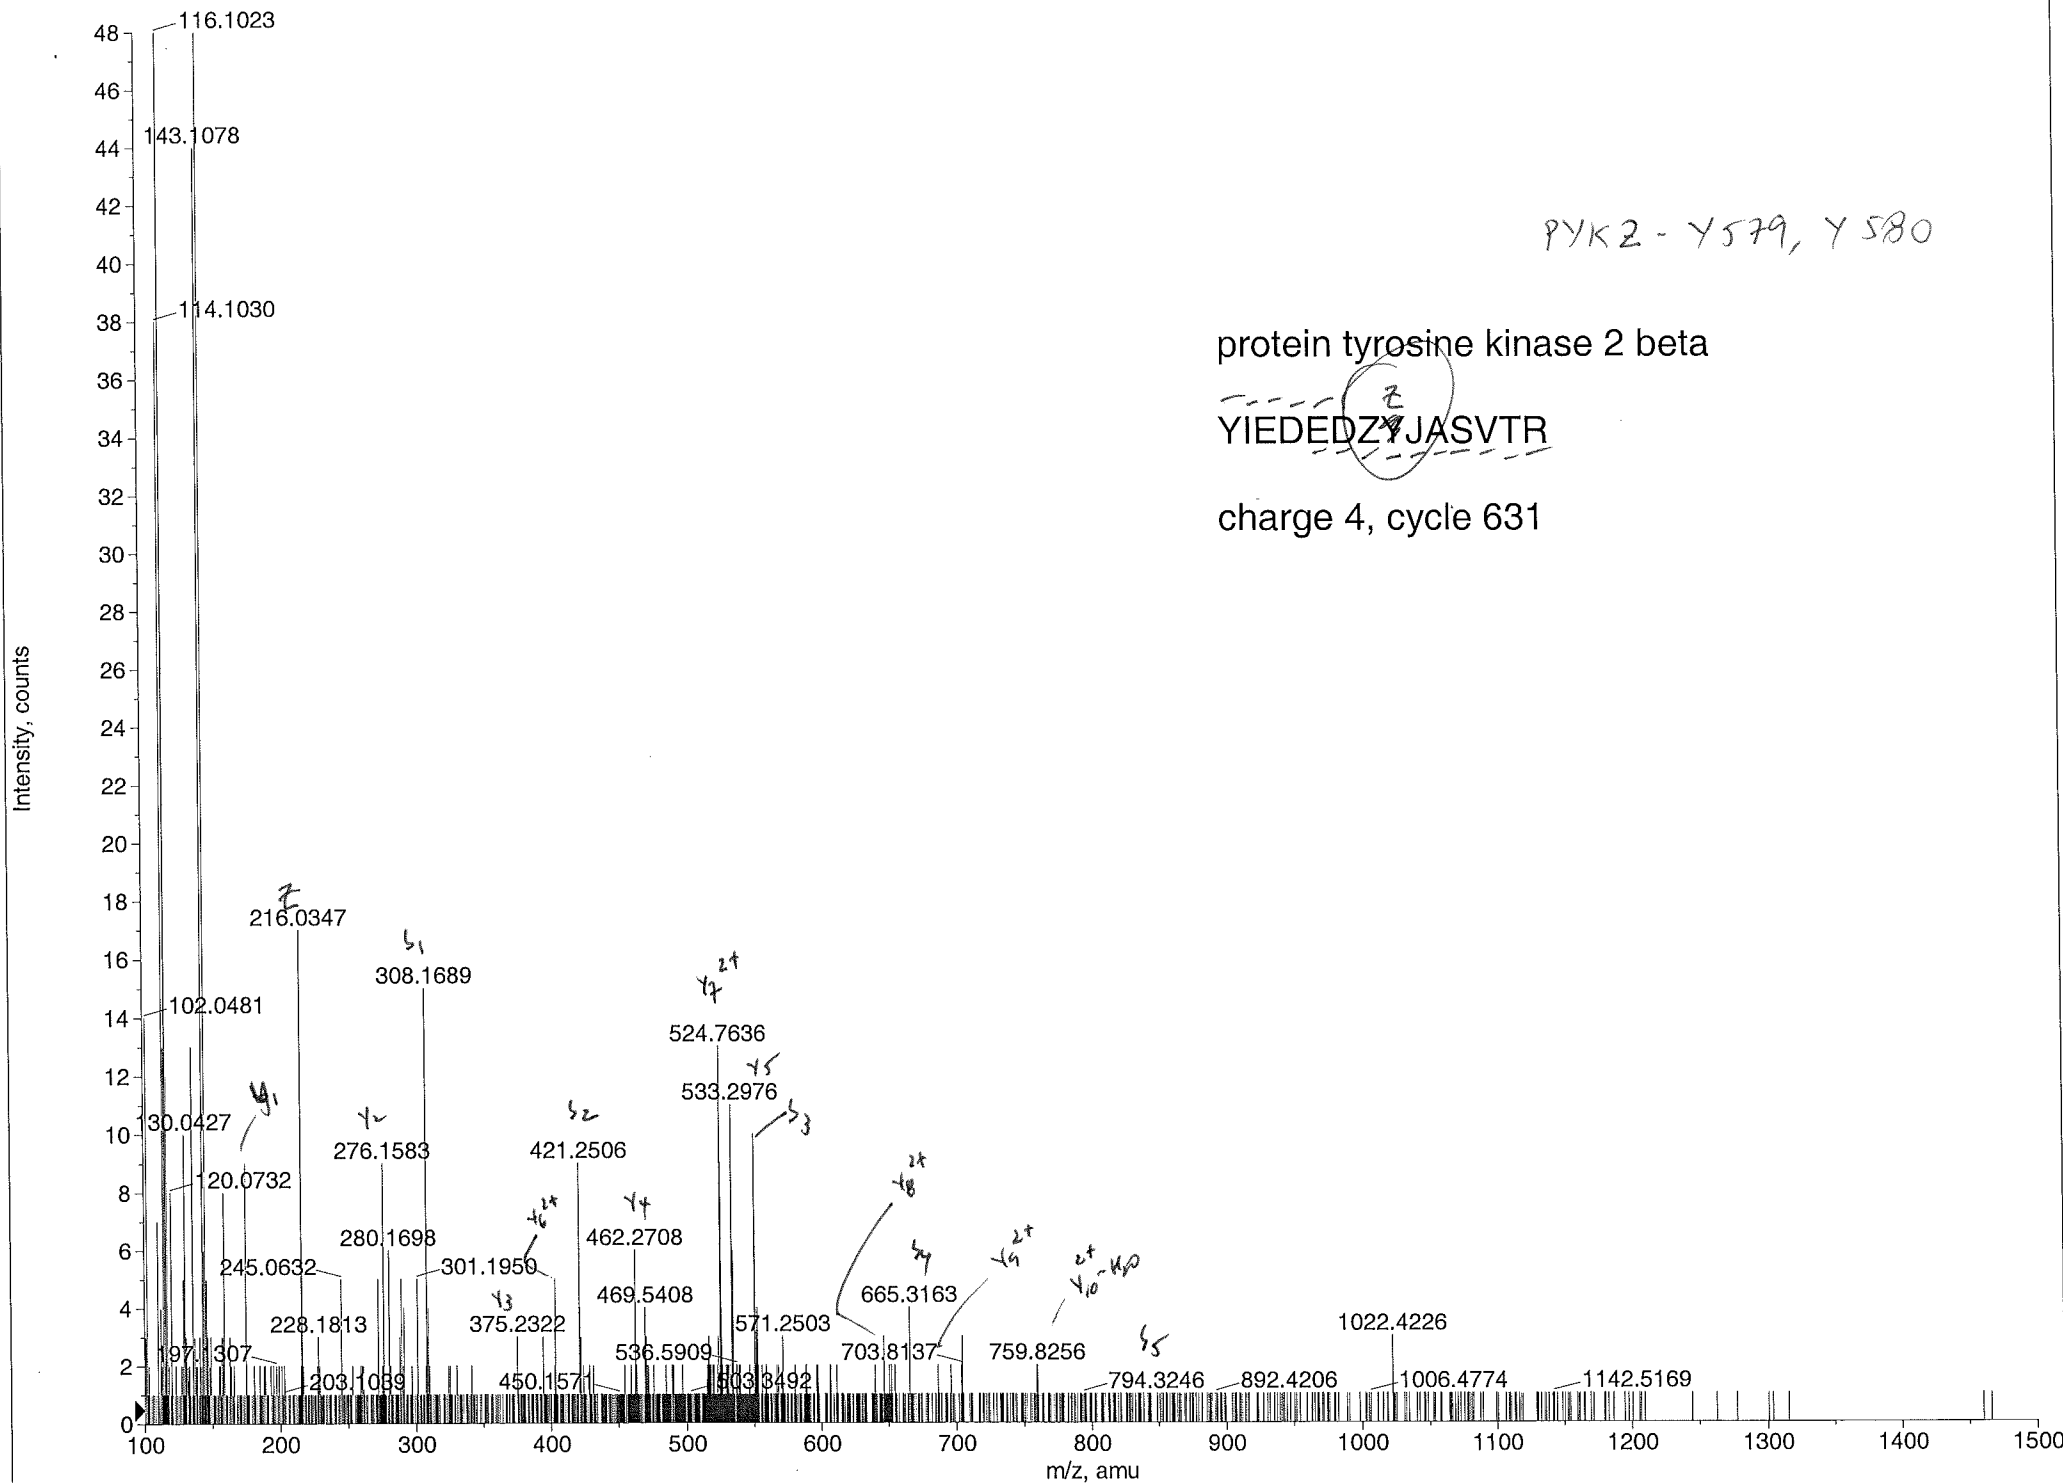

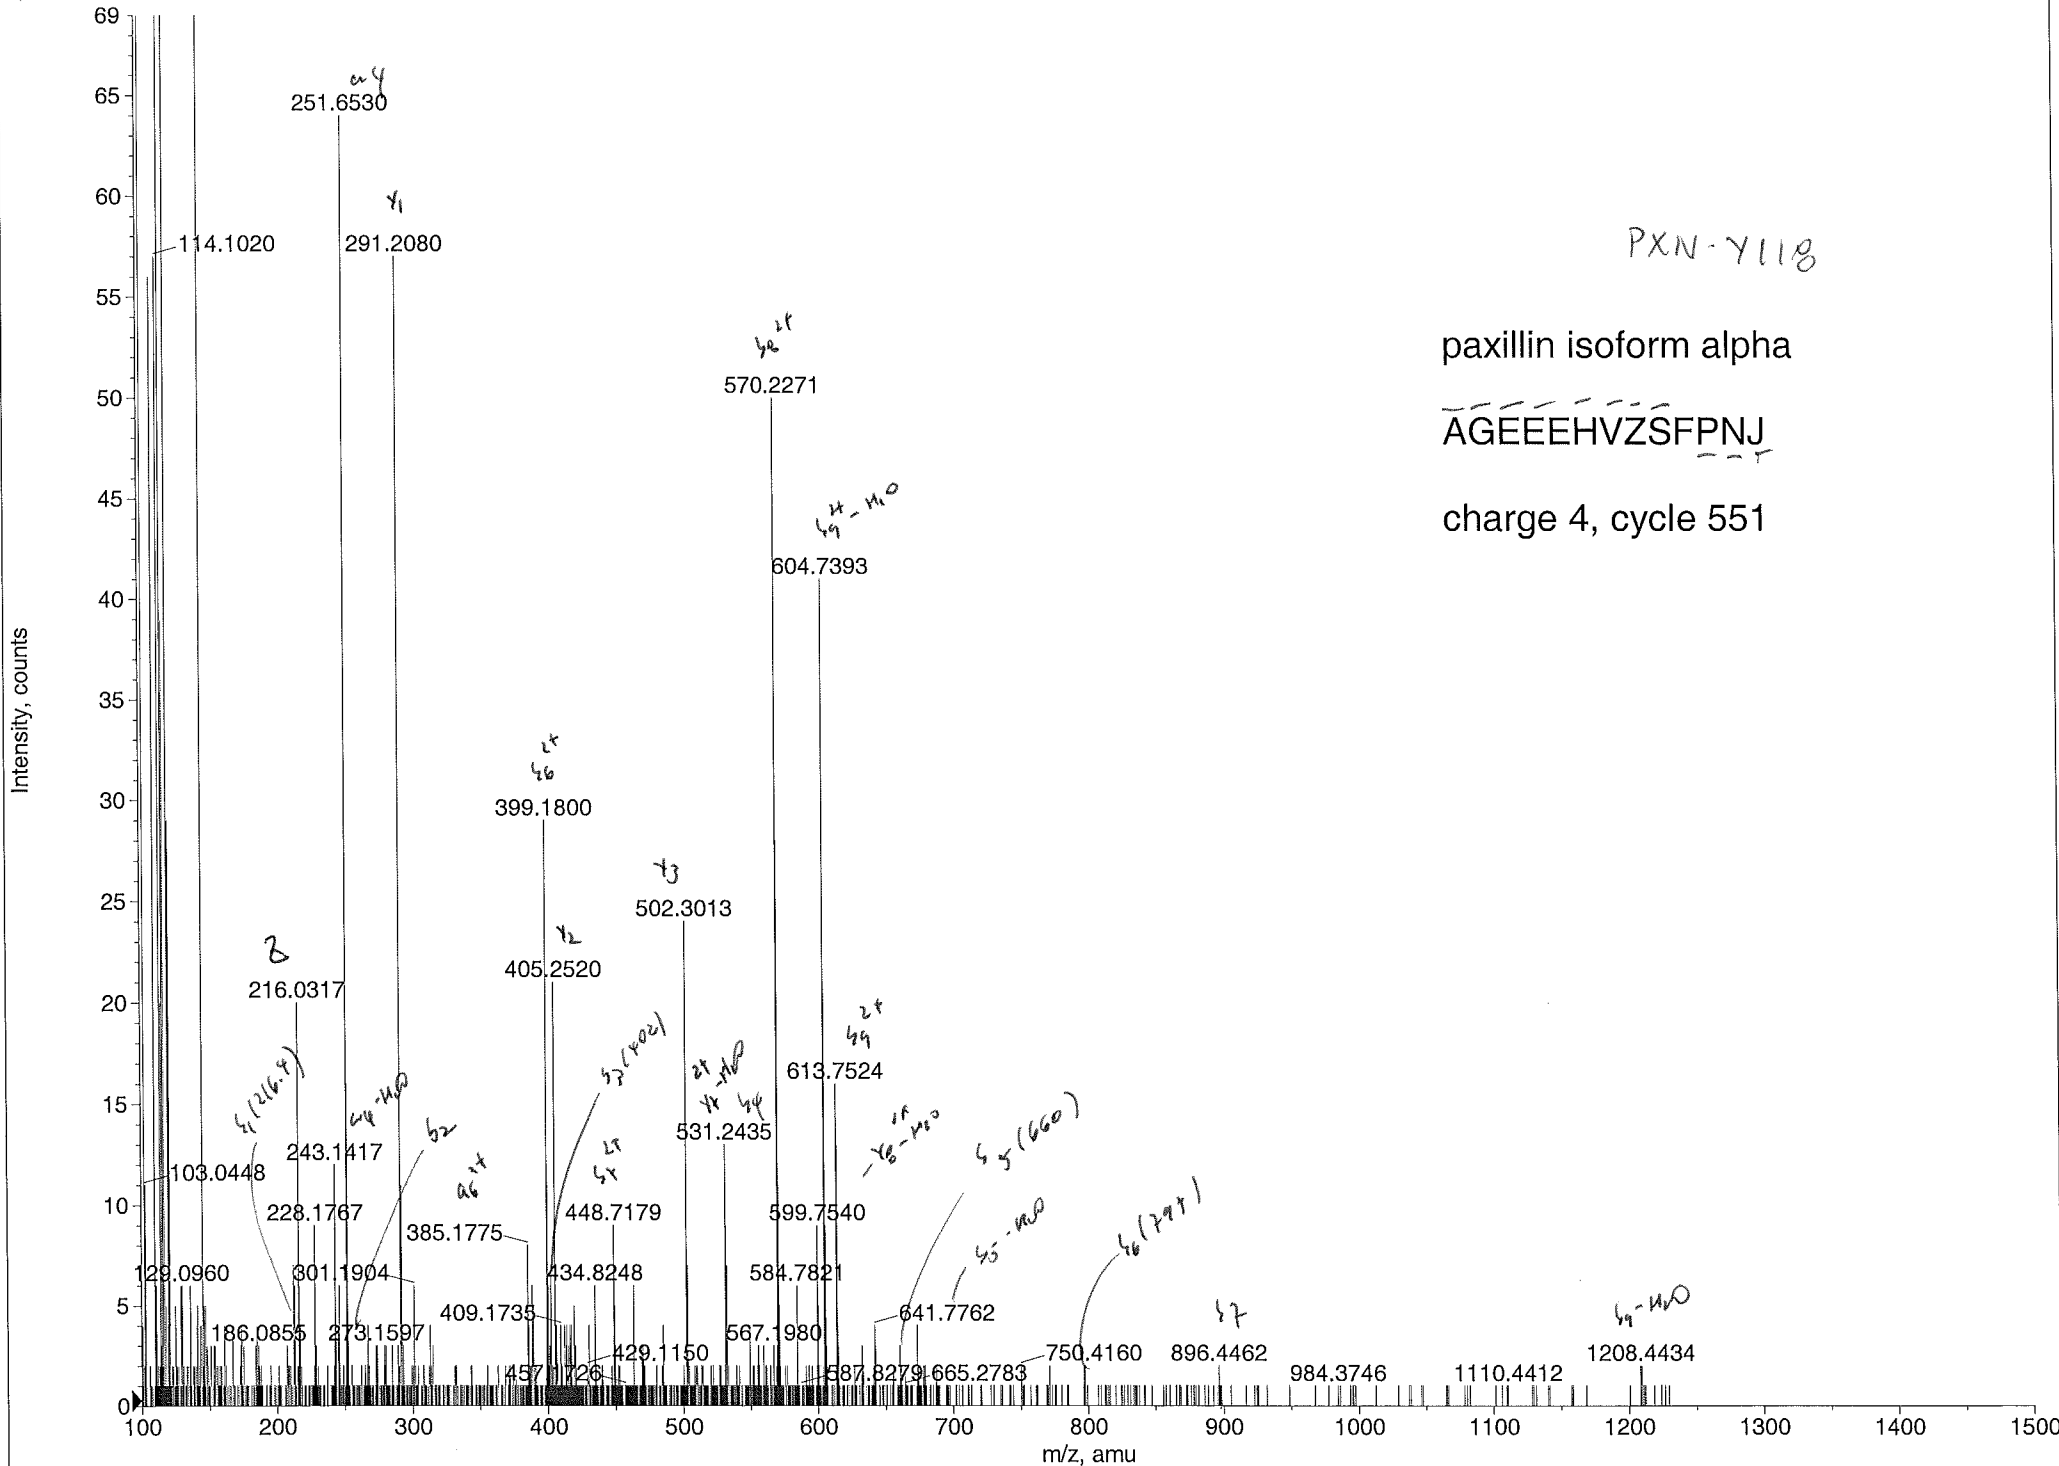

PXN-Y118

paxillin isoform alpha

AGEEEHVZSFPNJ

charge 4, cycle 551

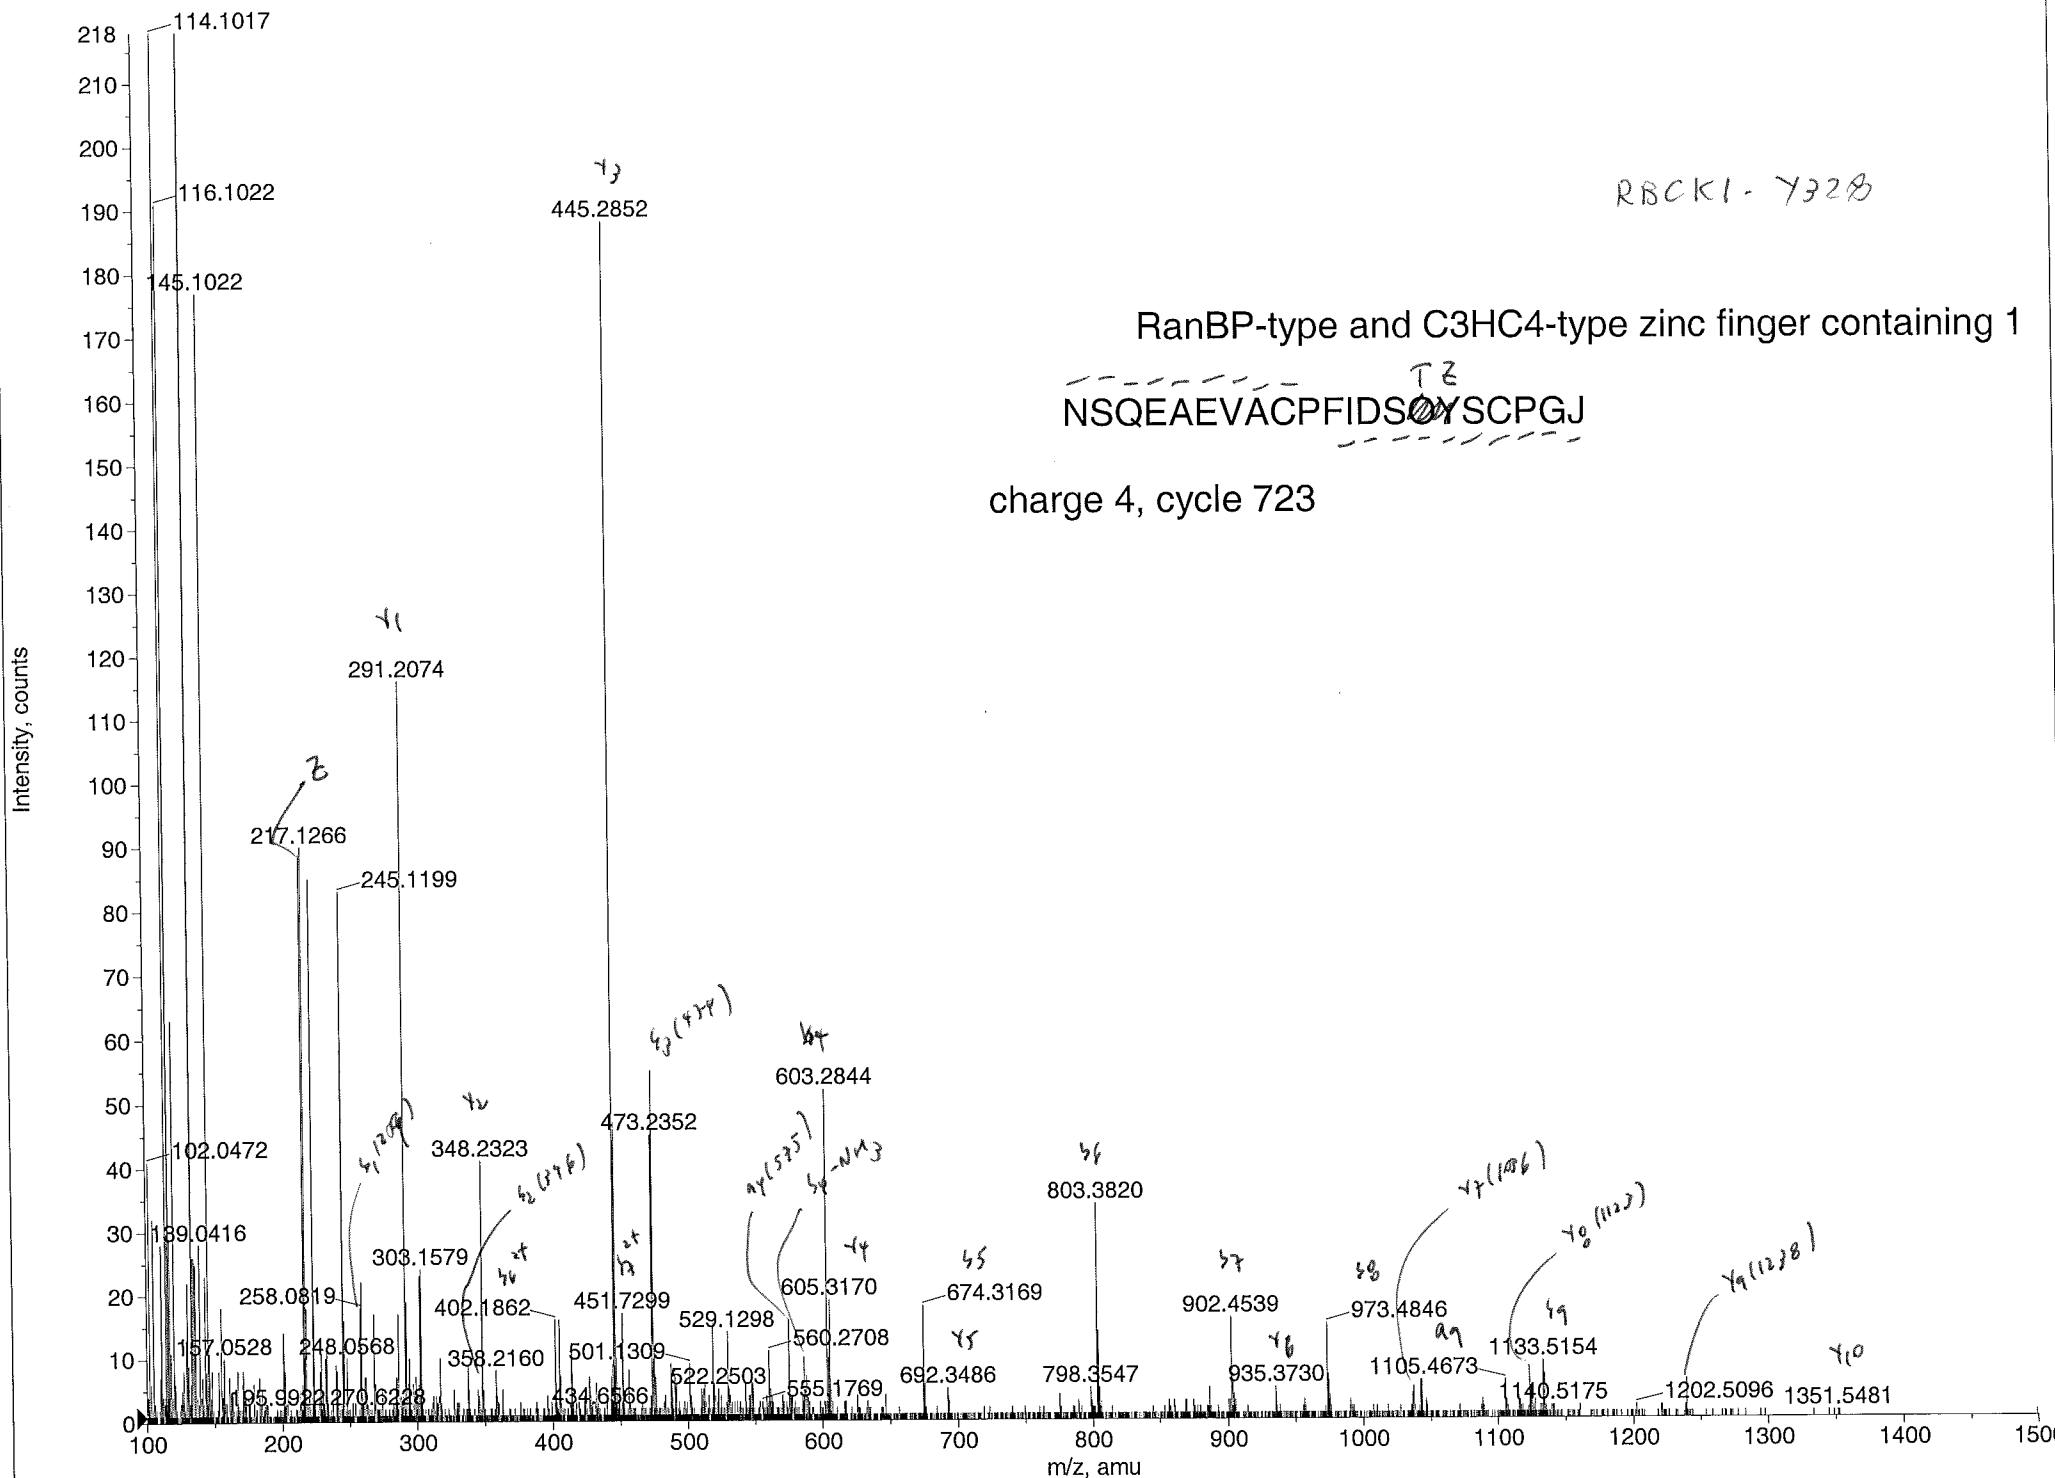

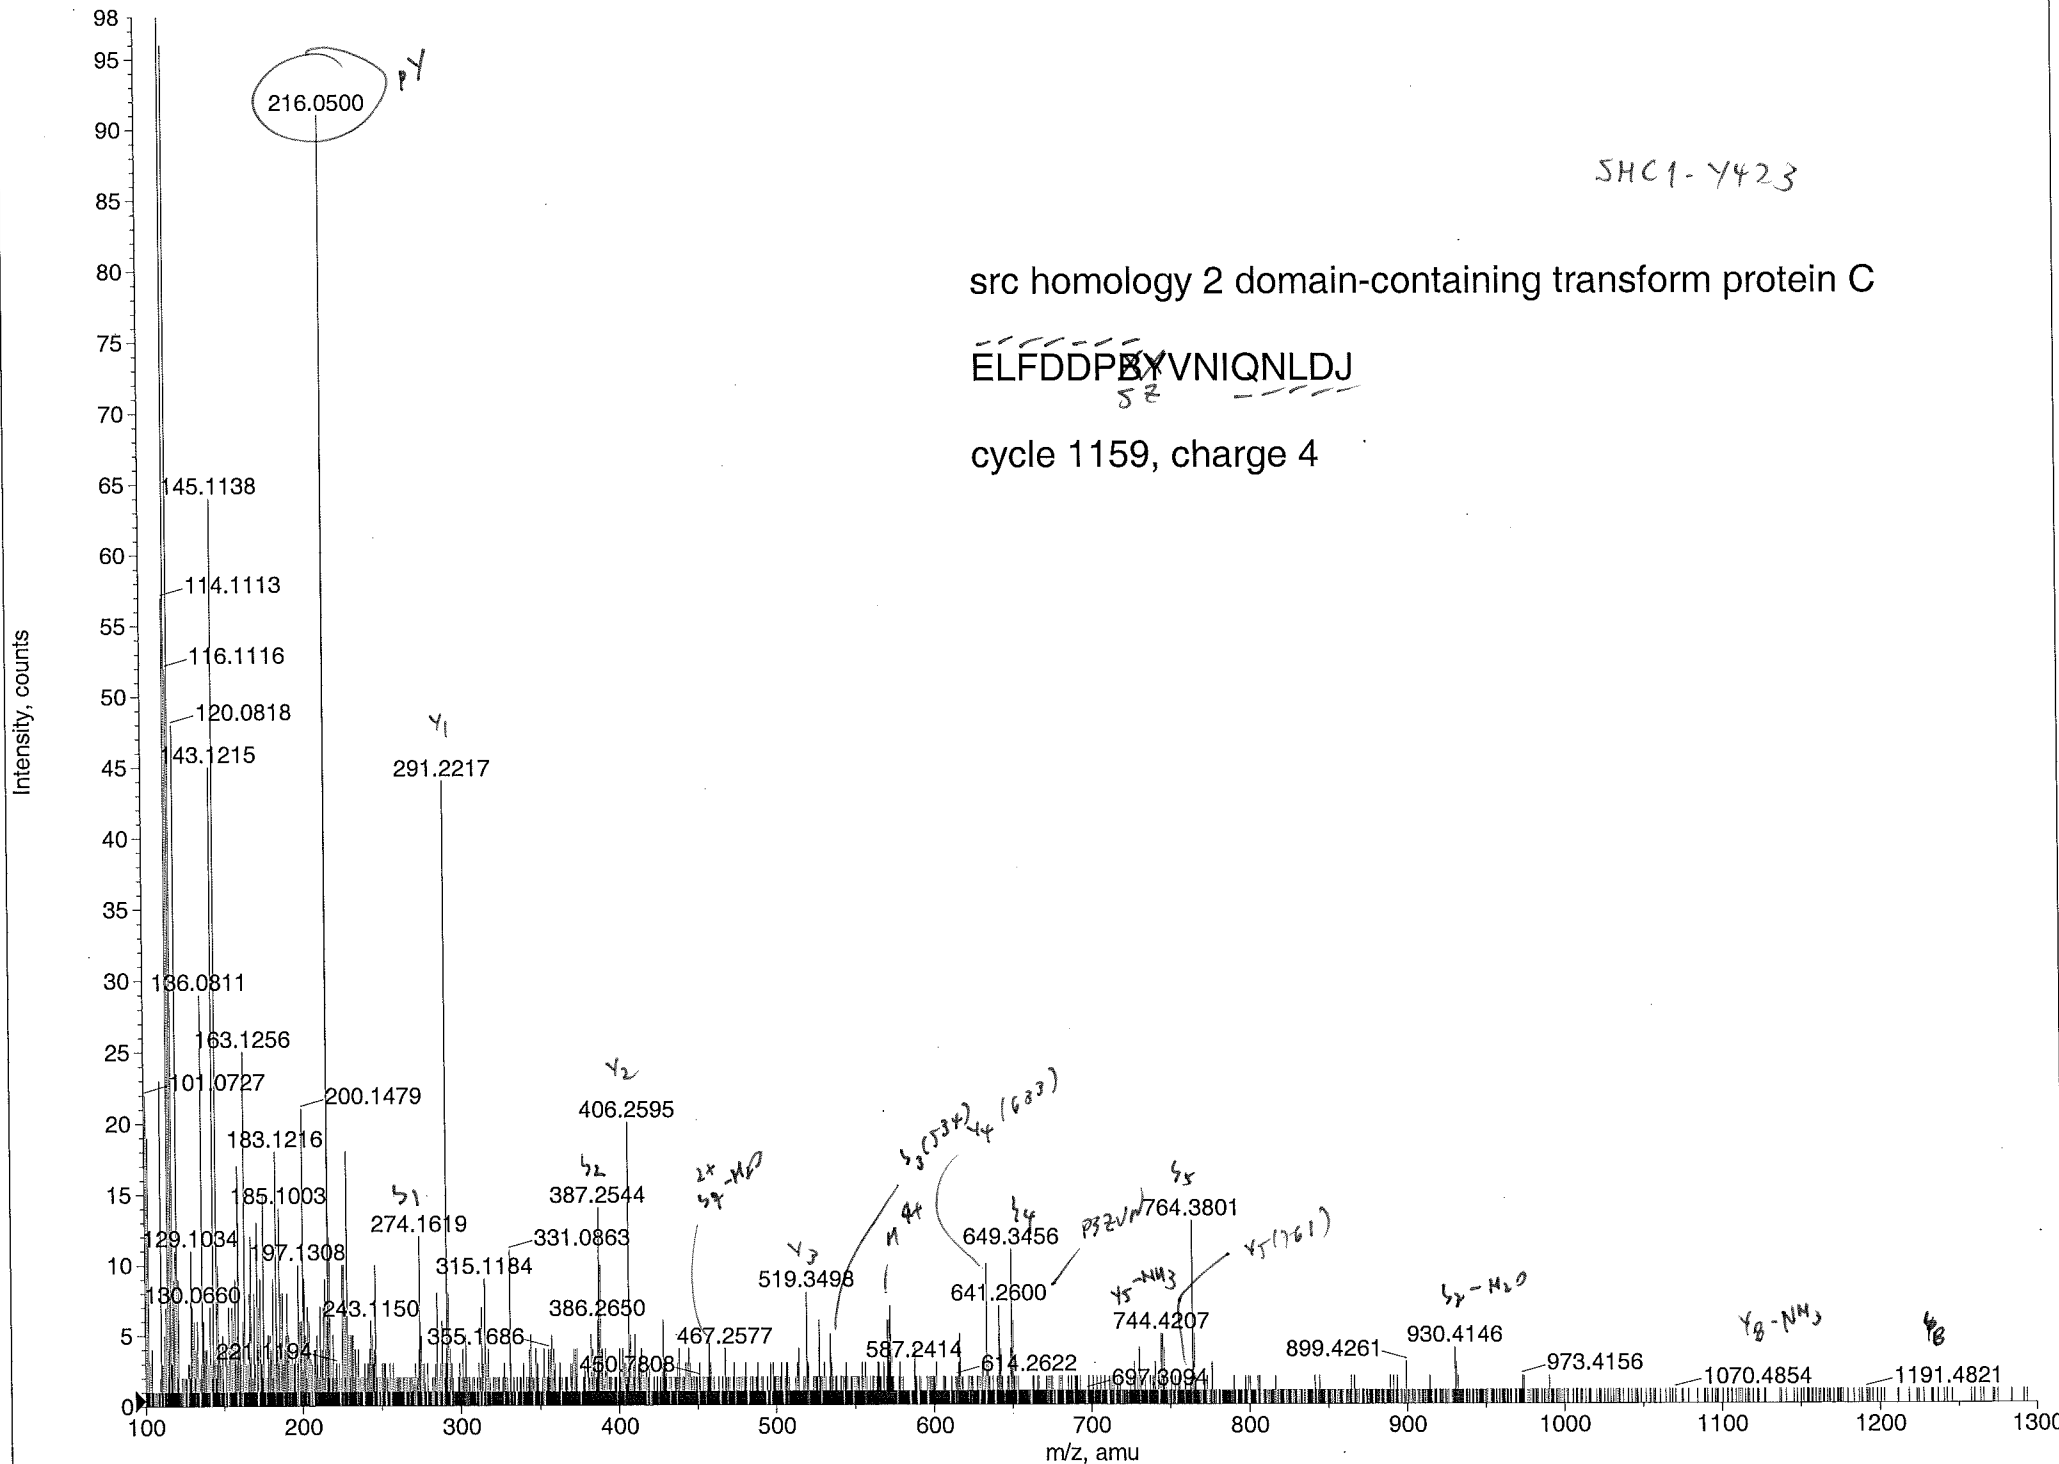

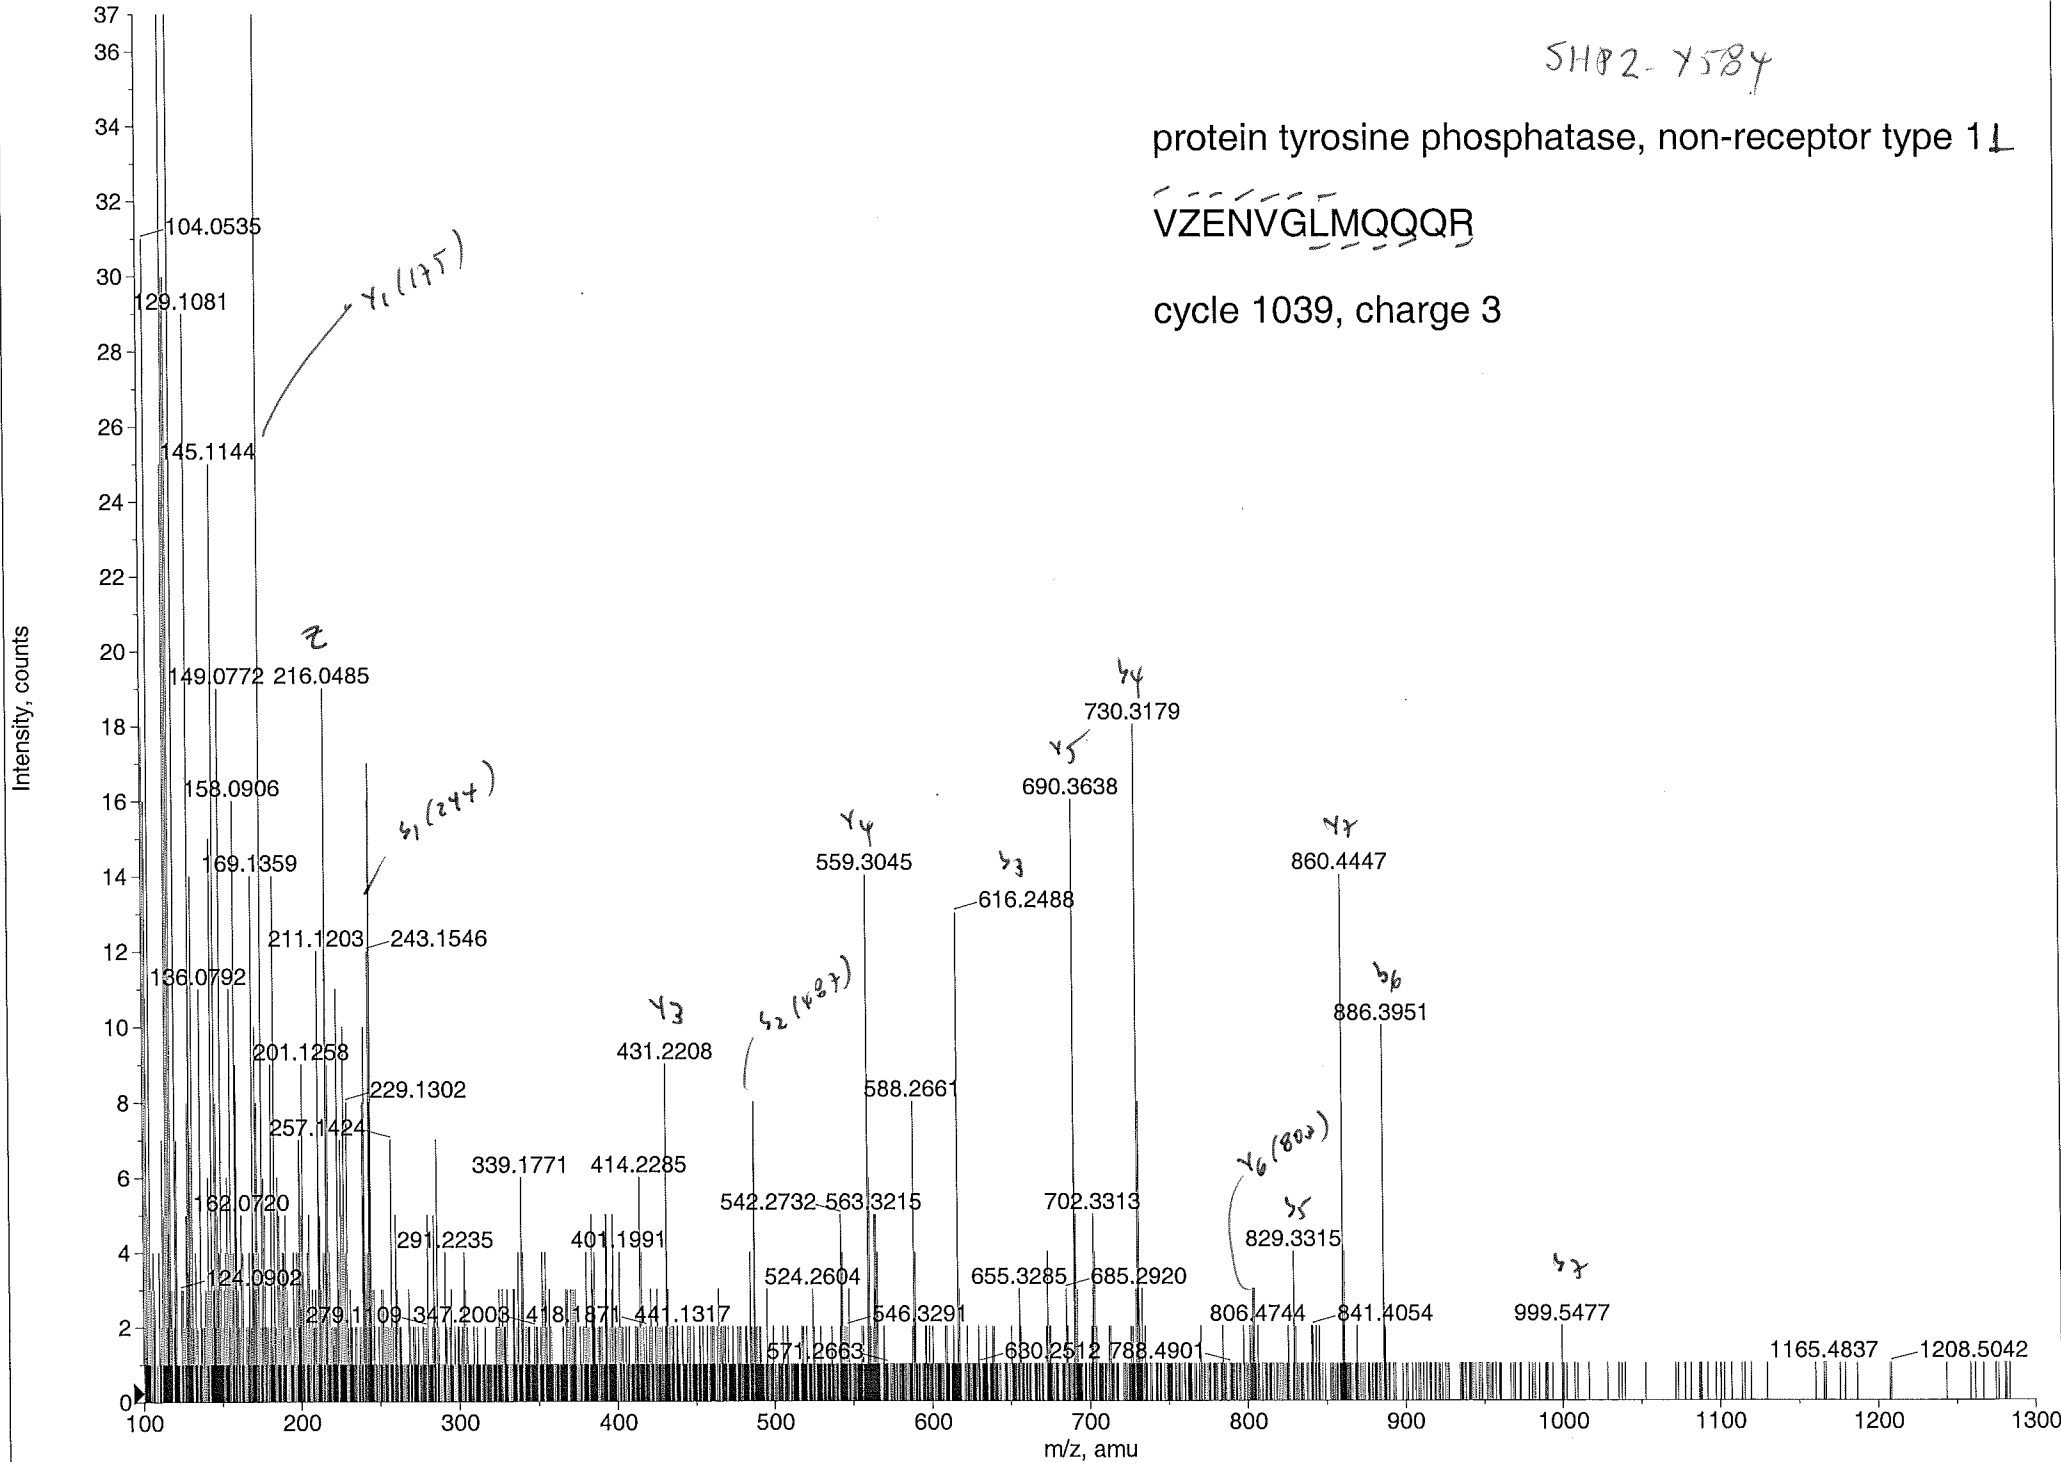

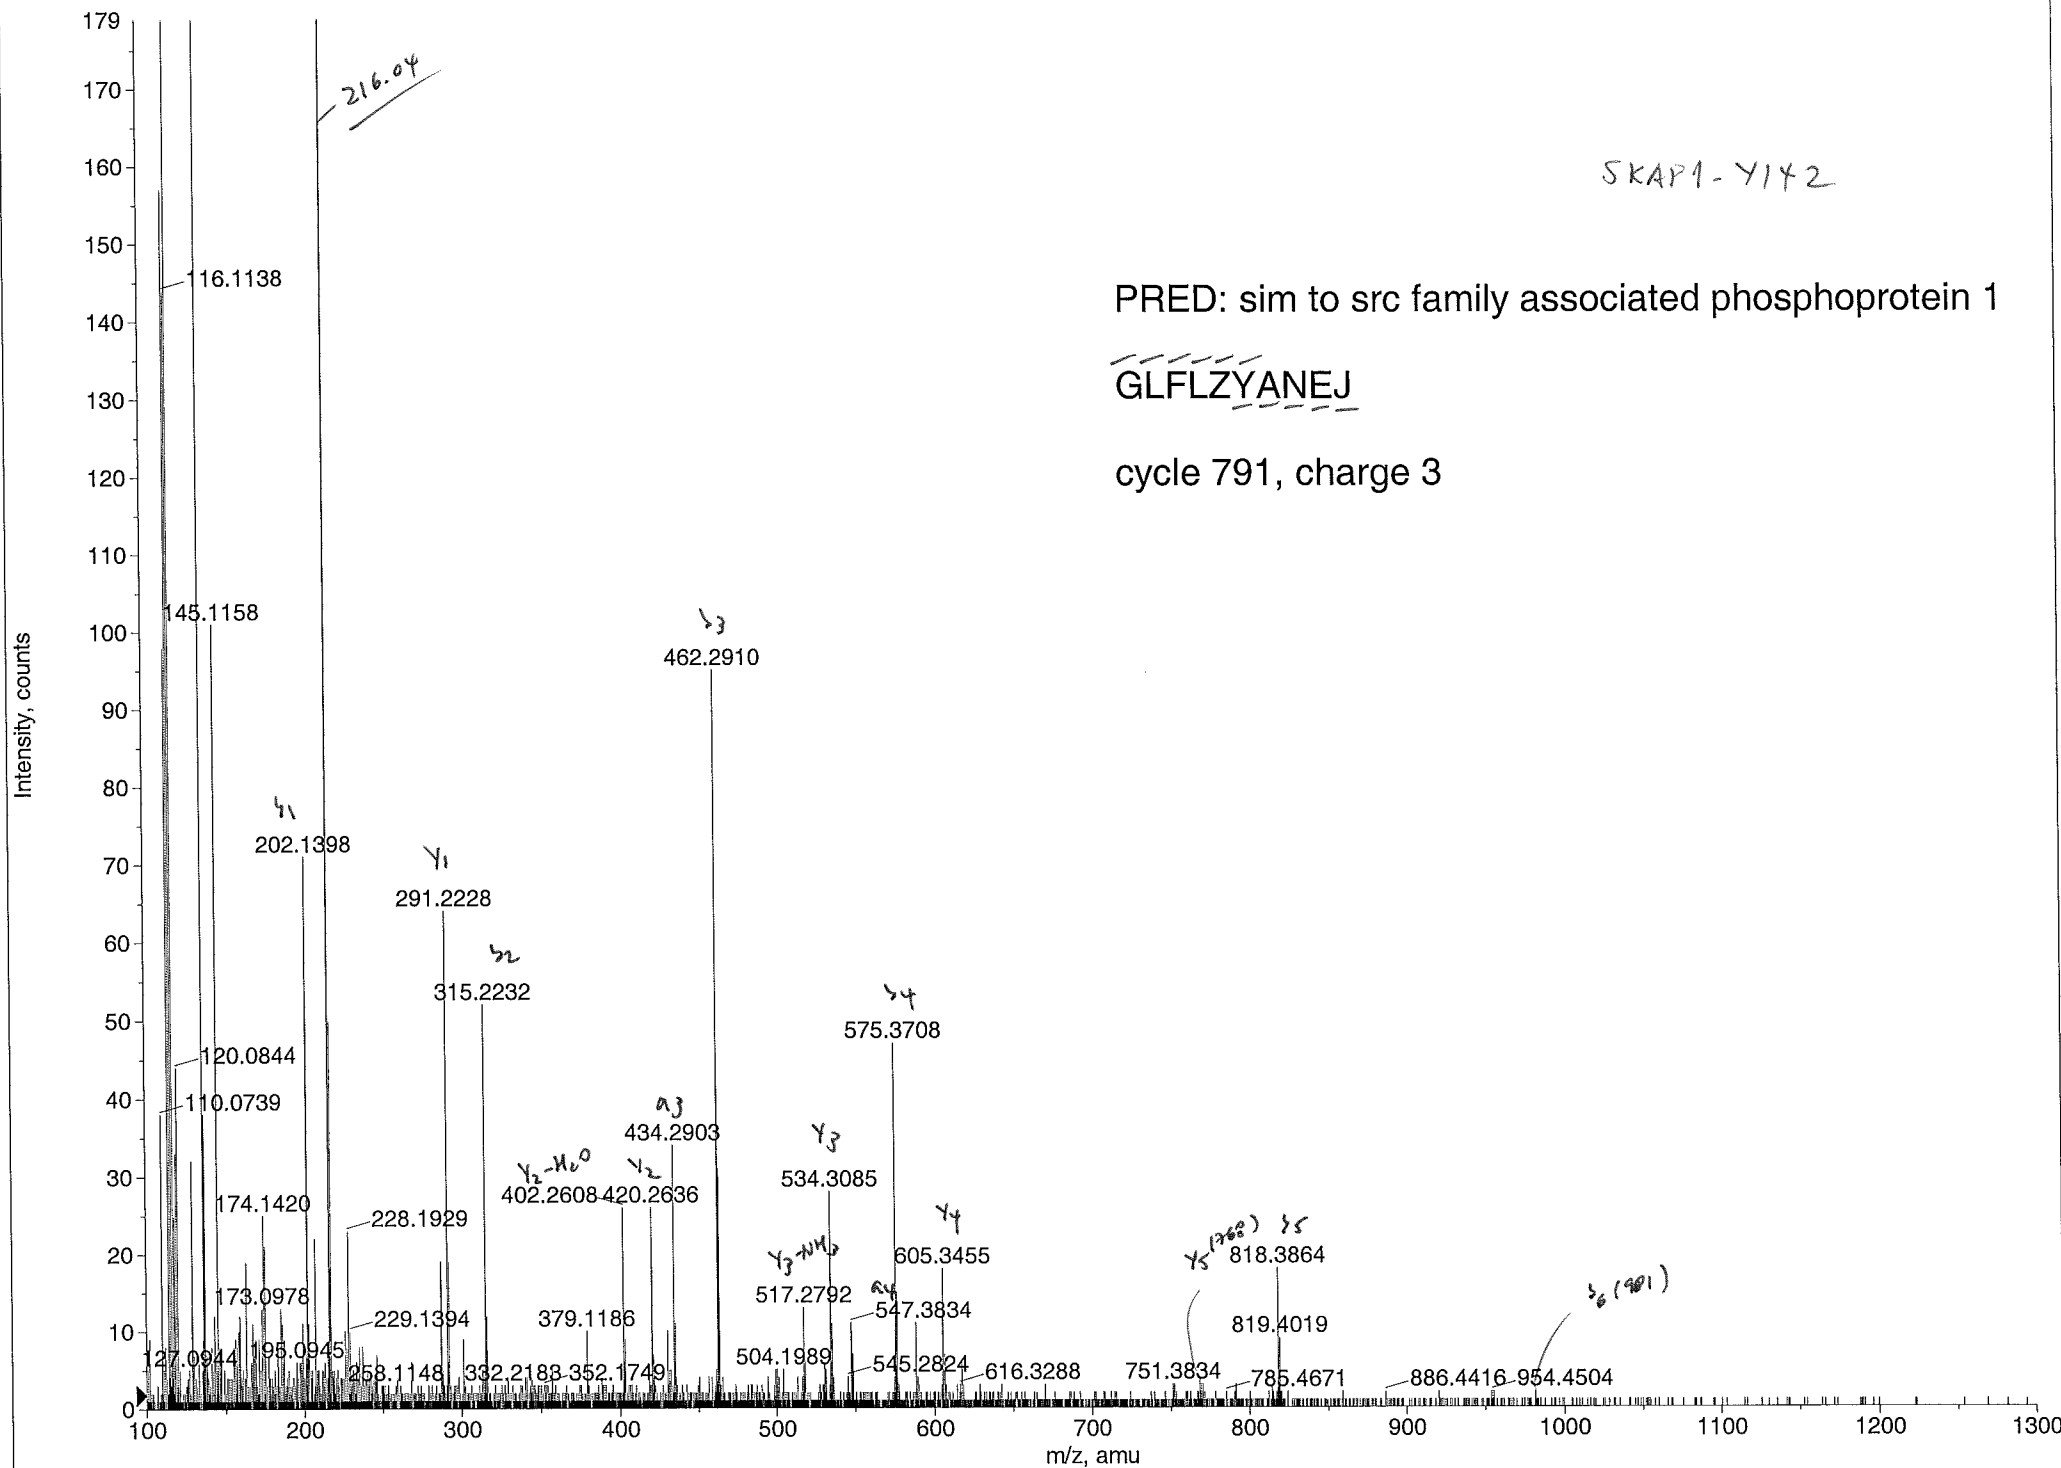



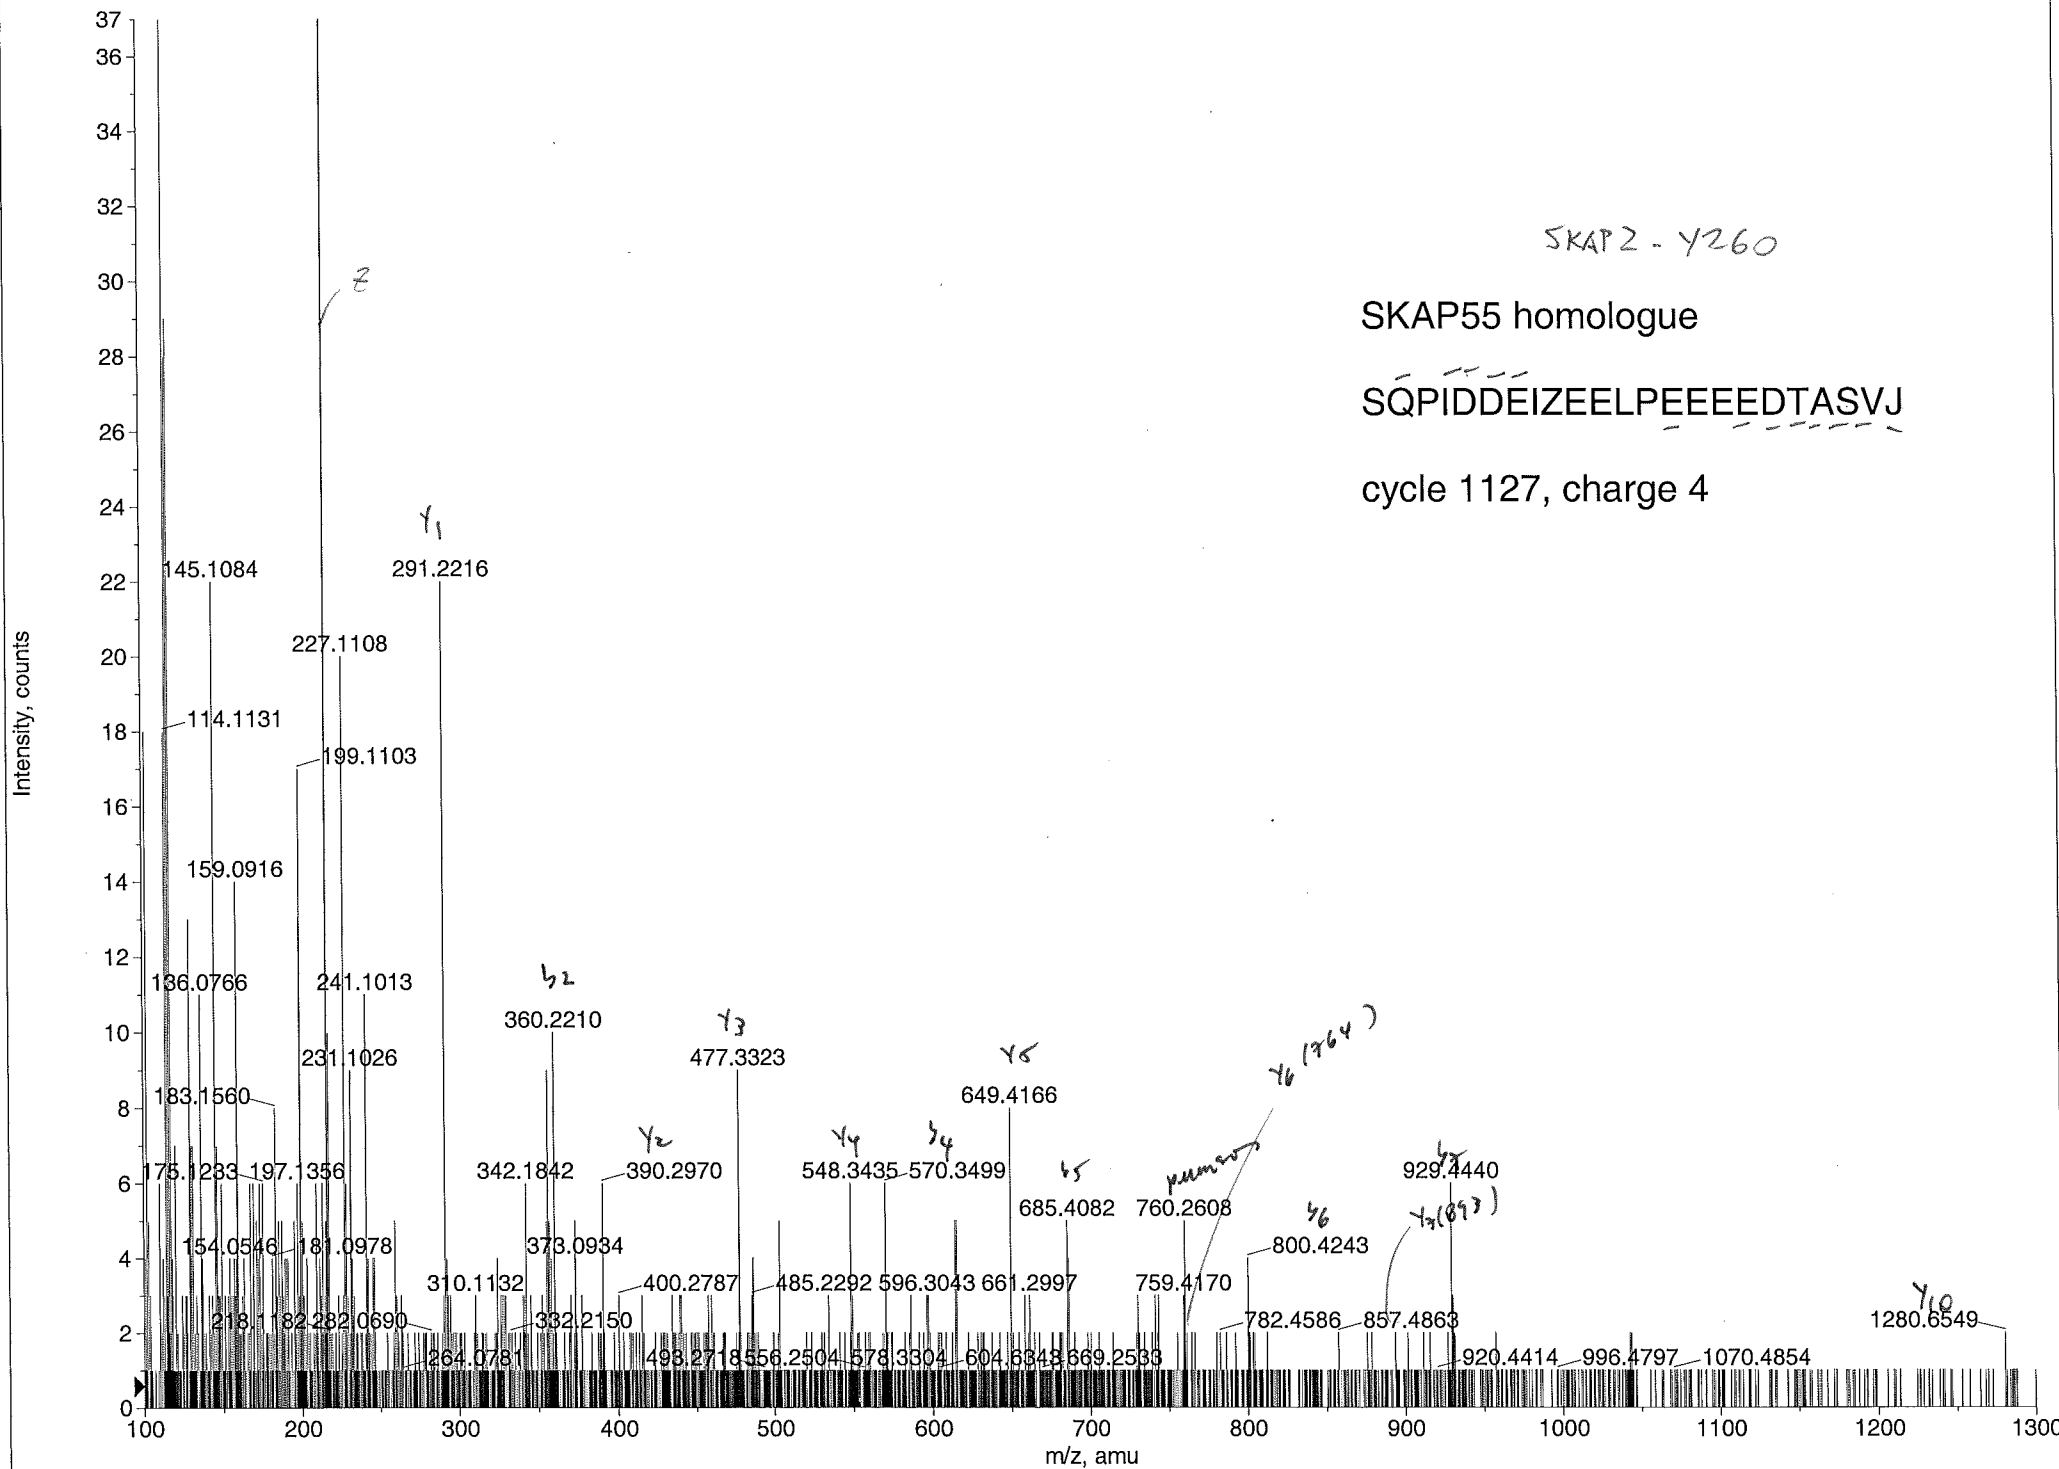

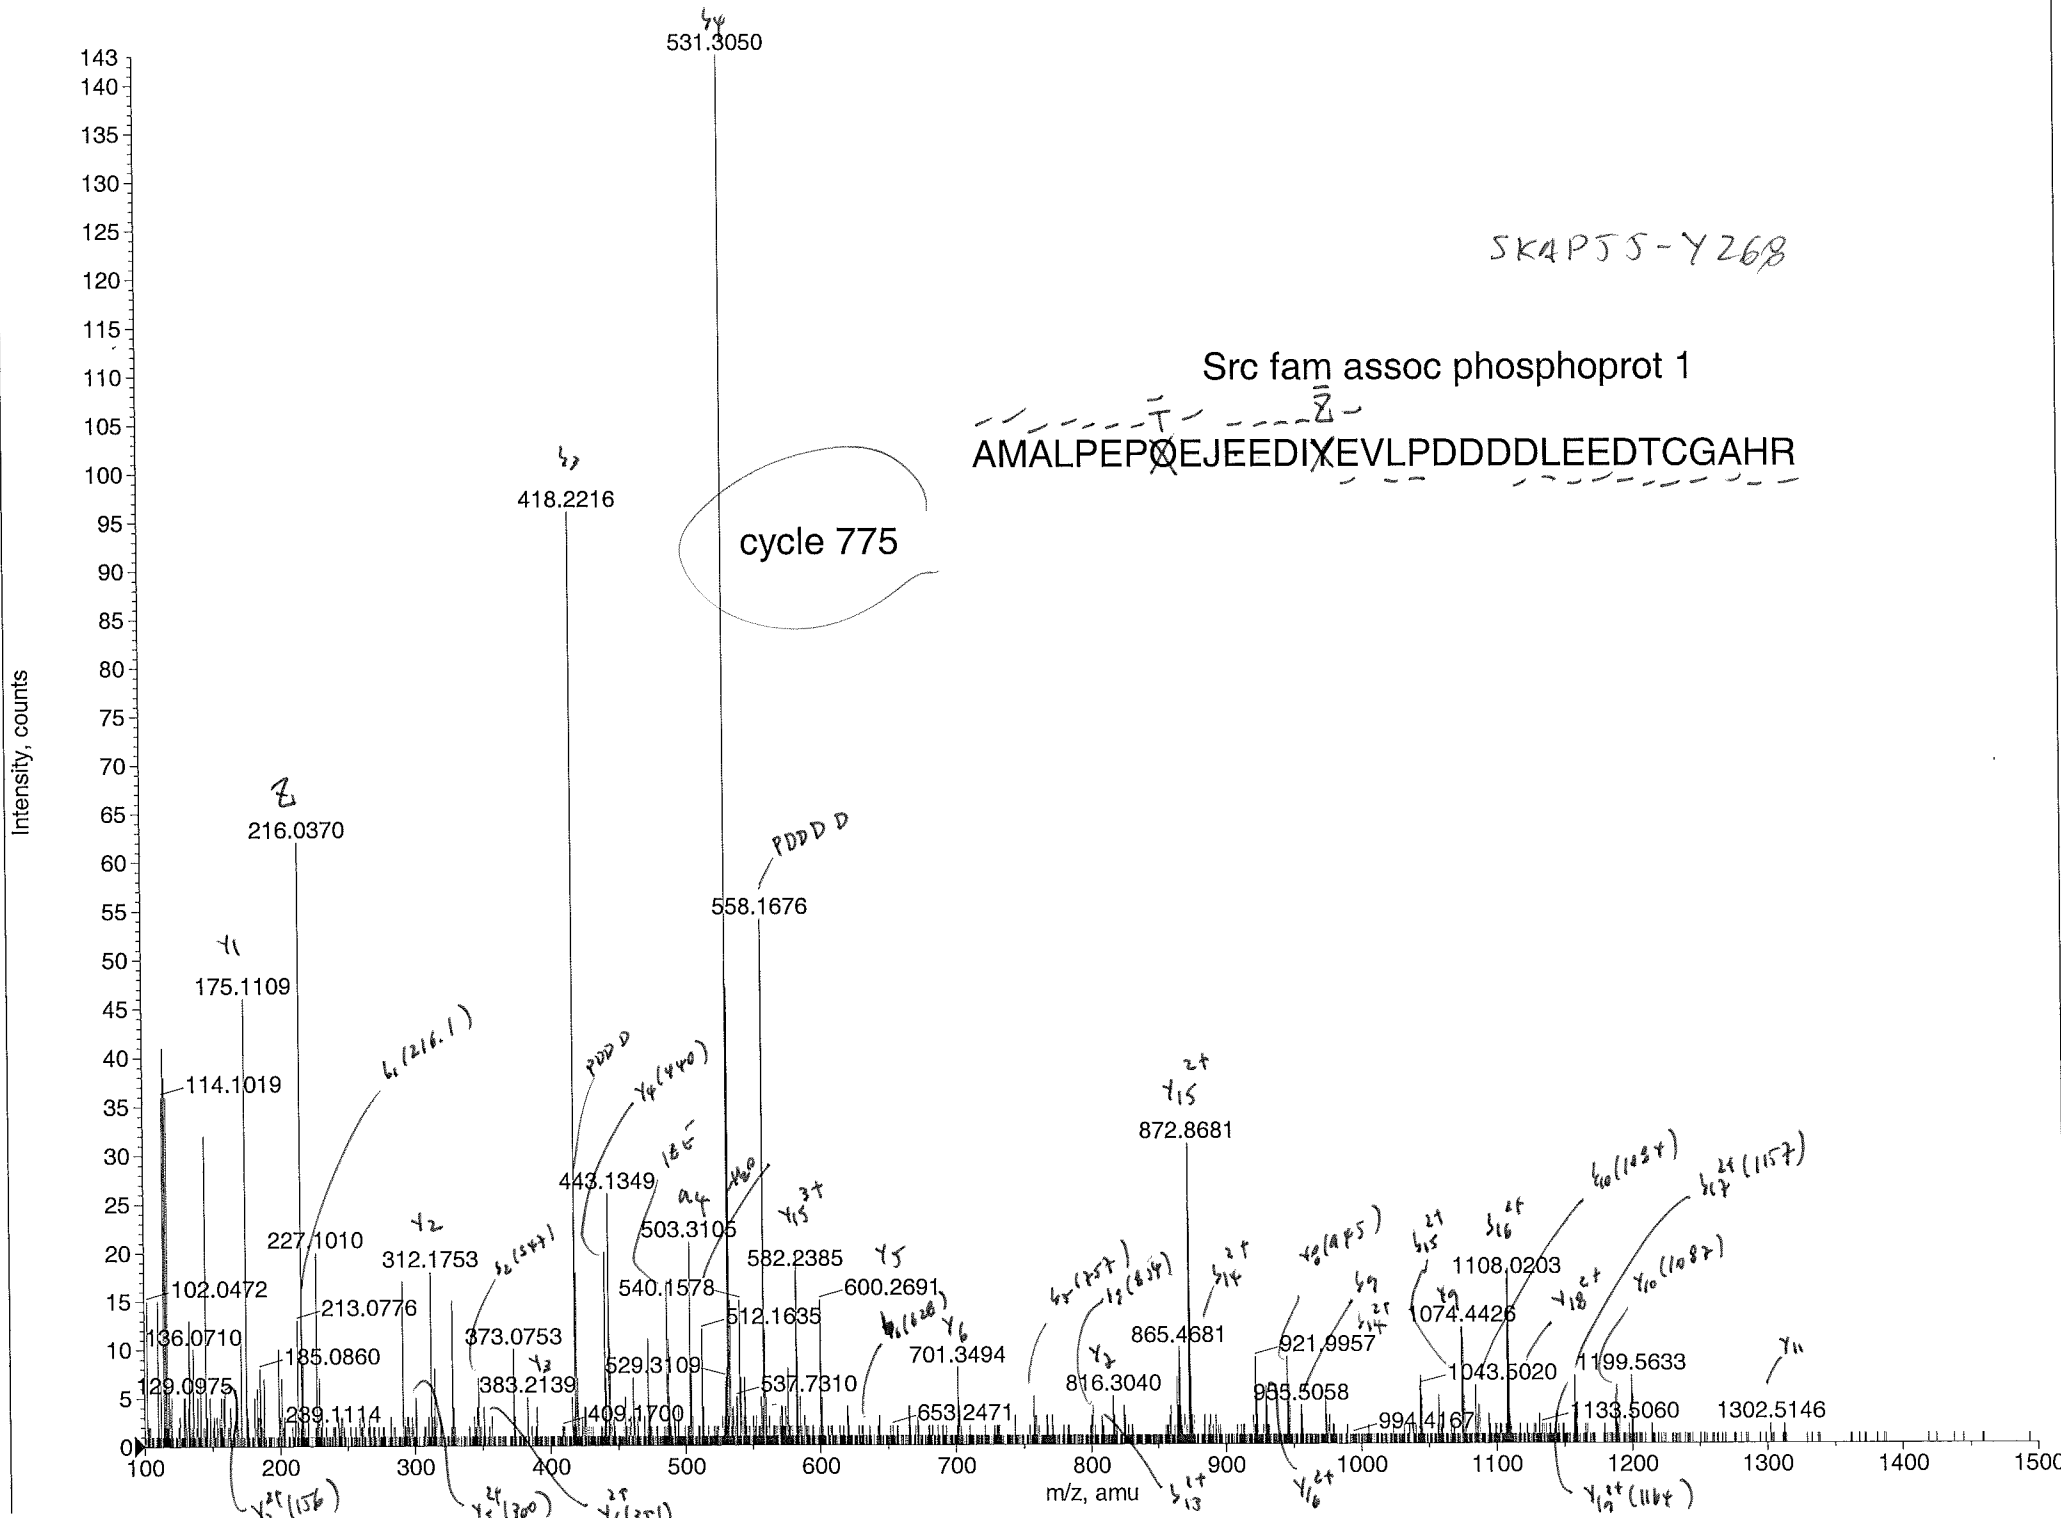

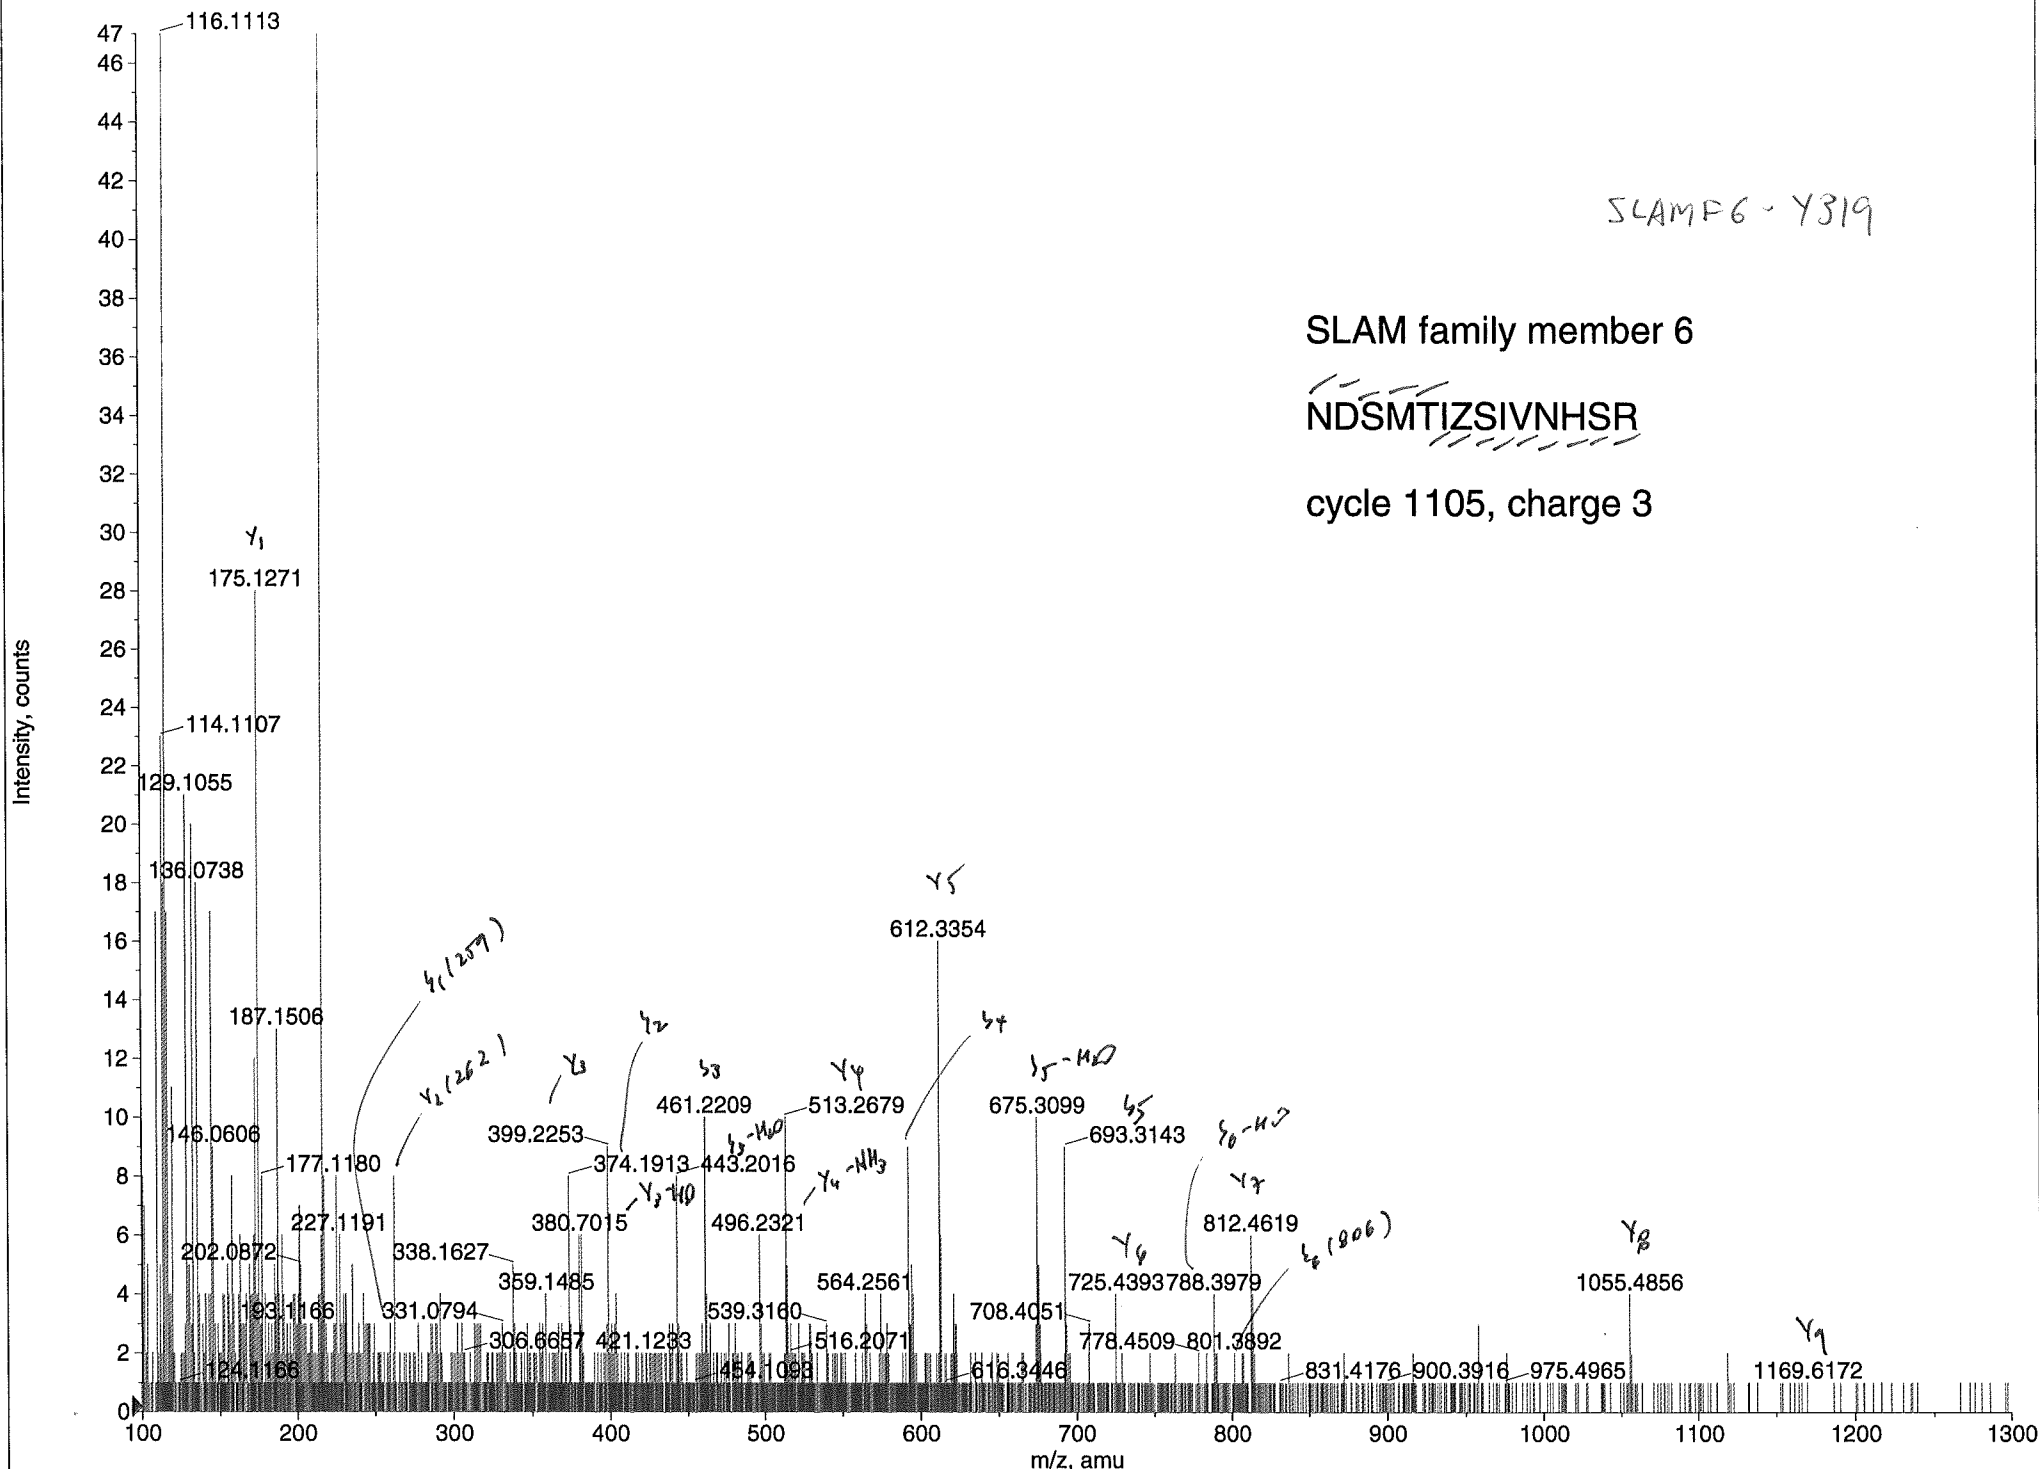

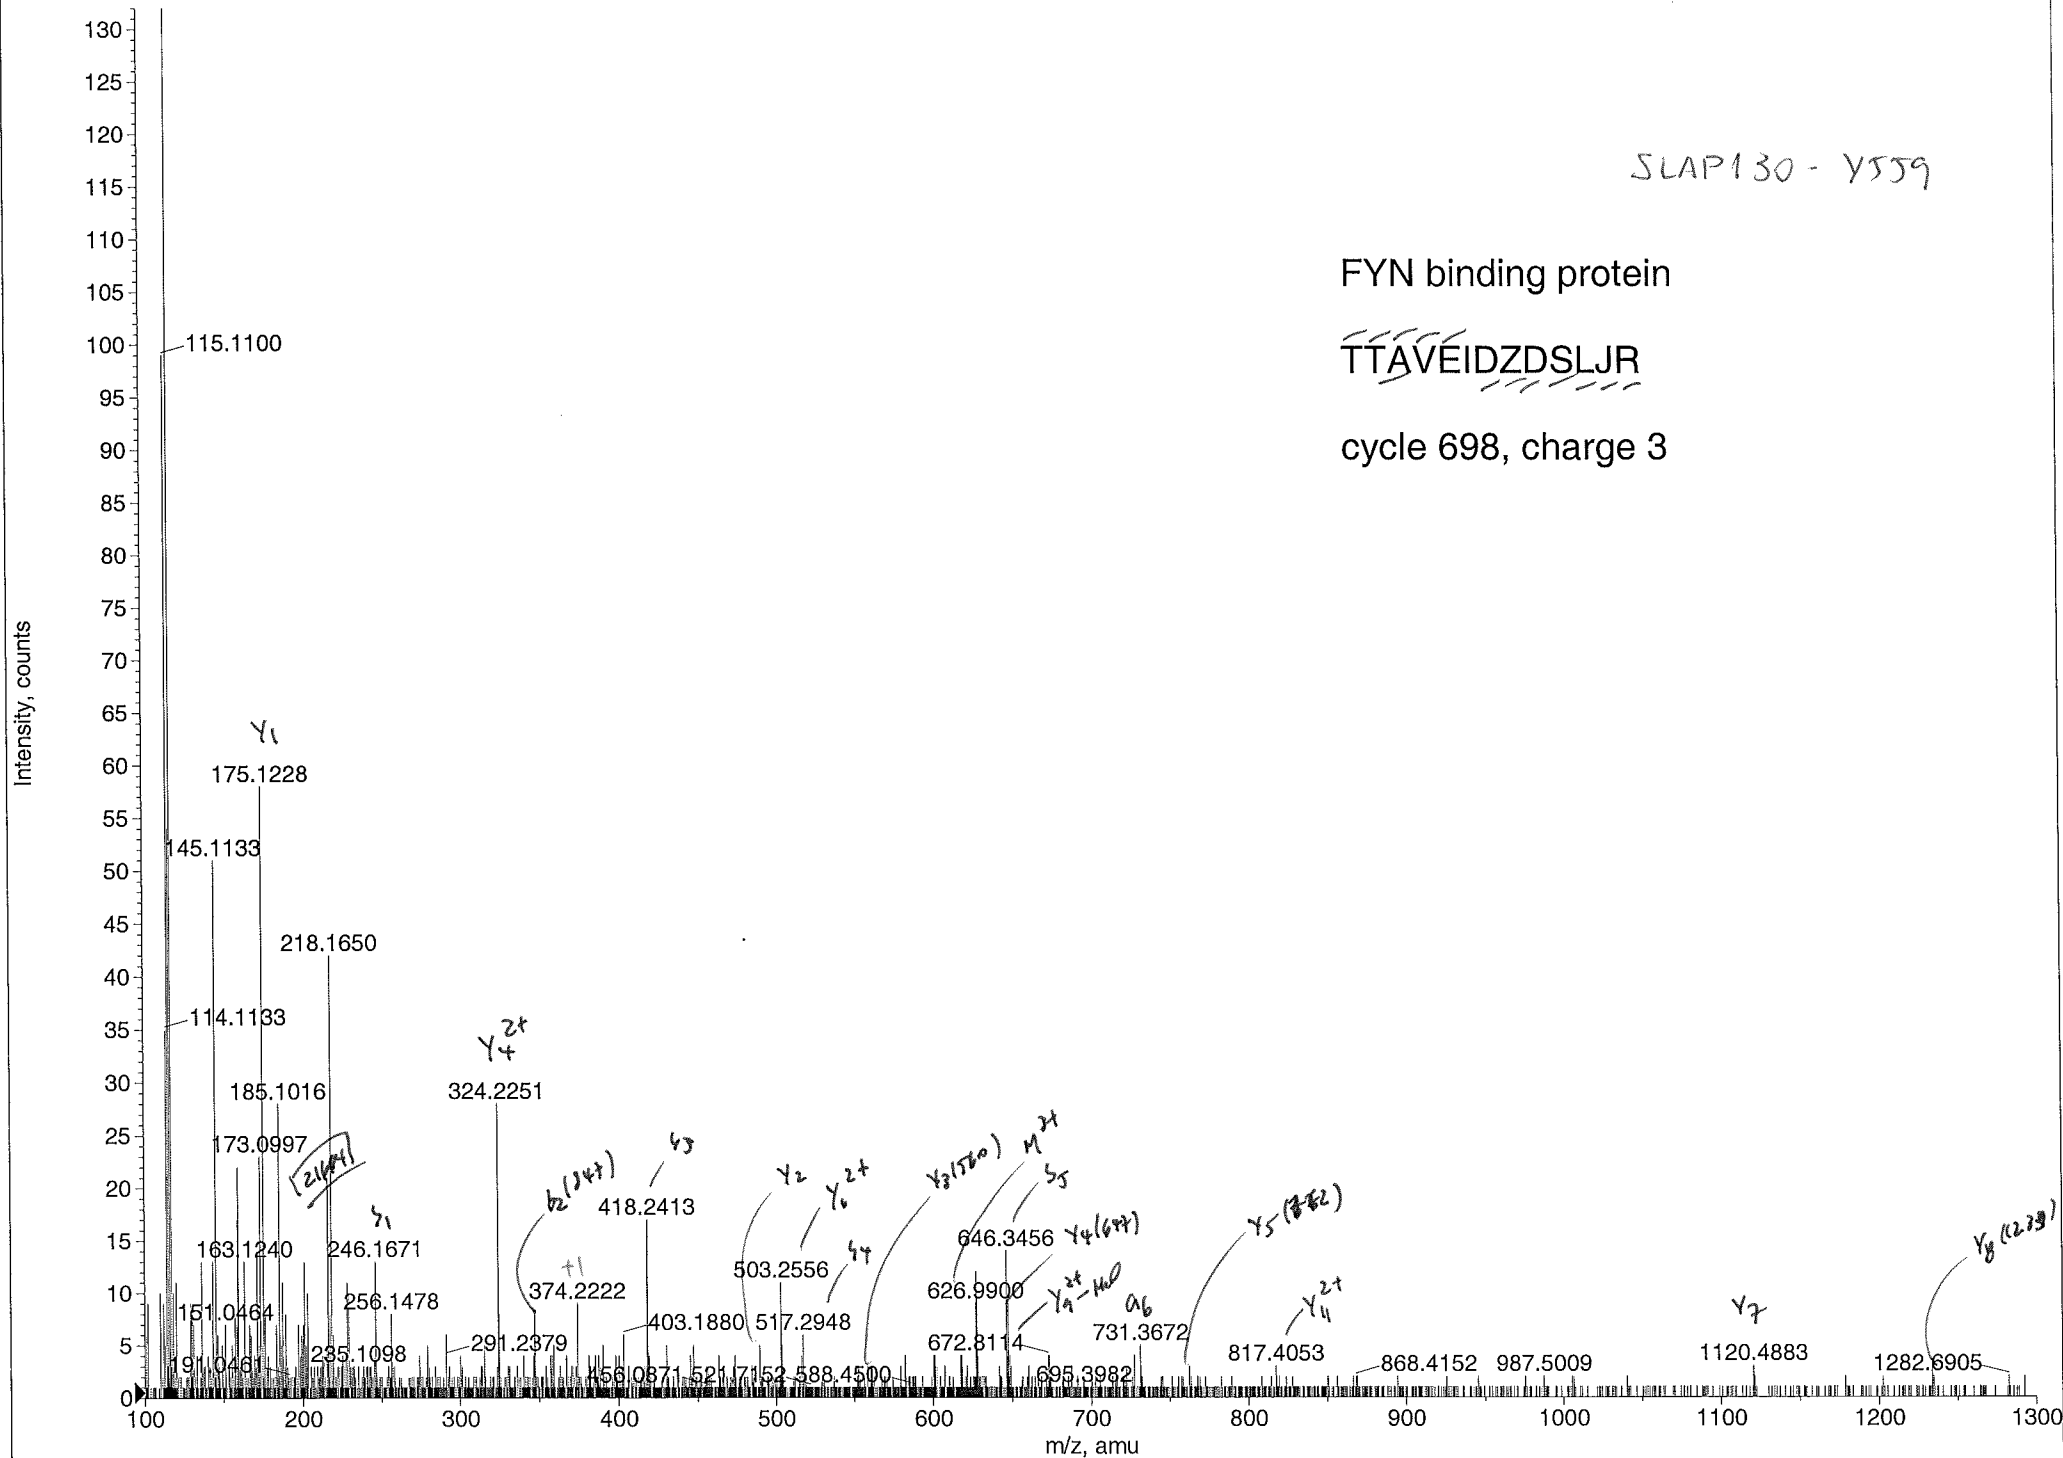

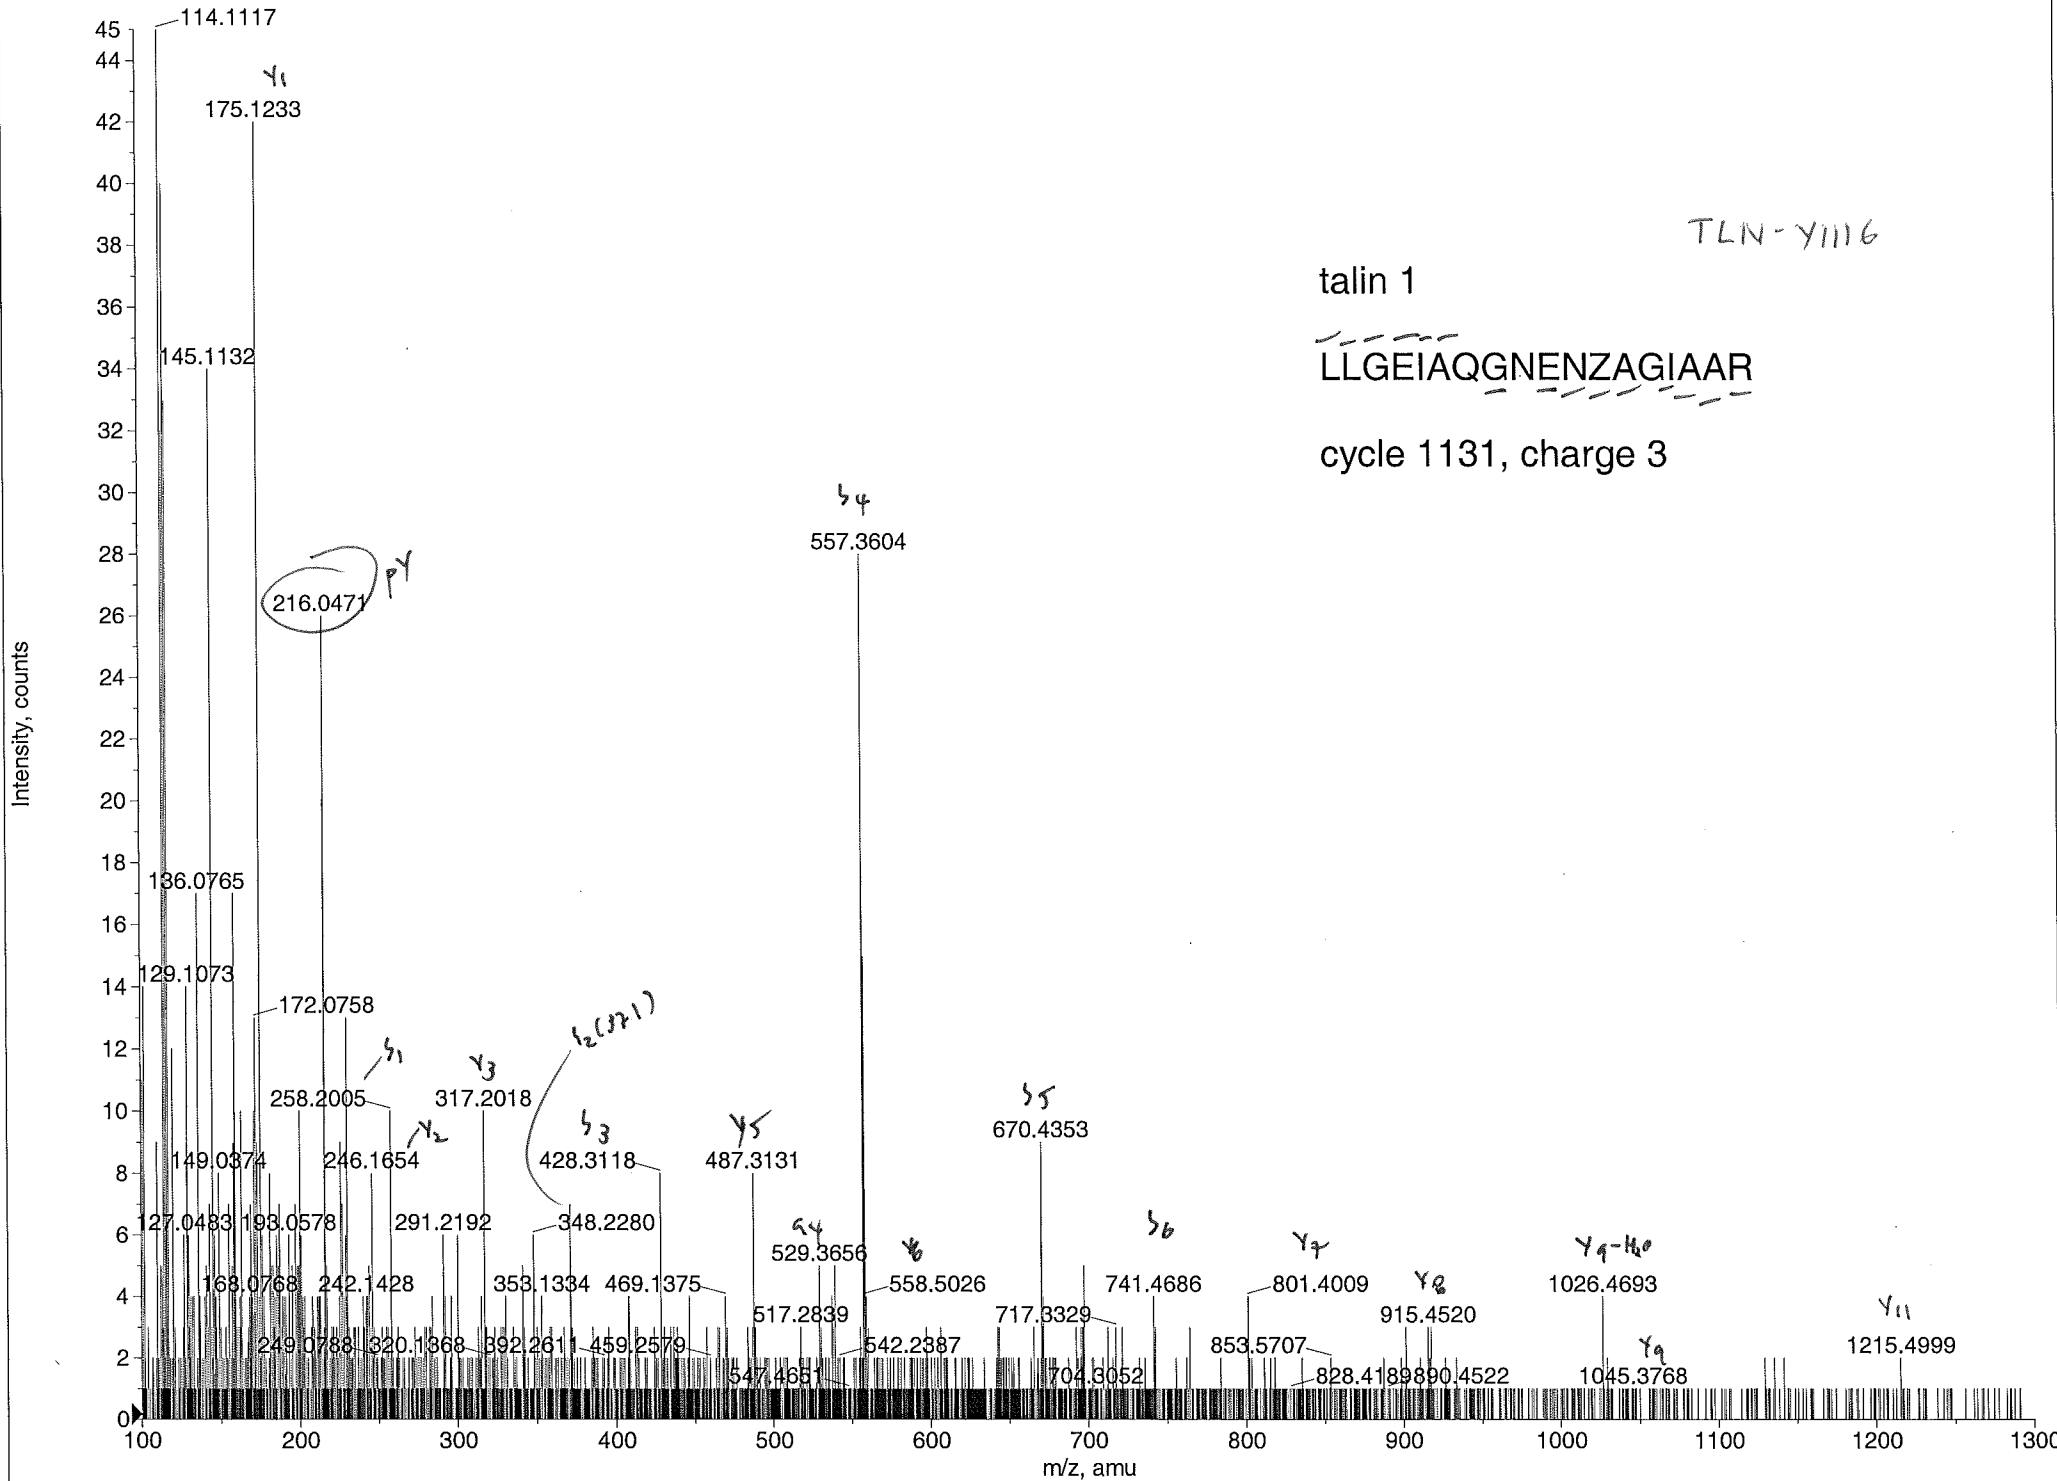

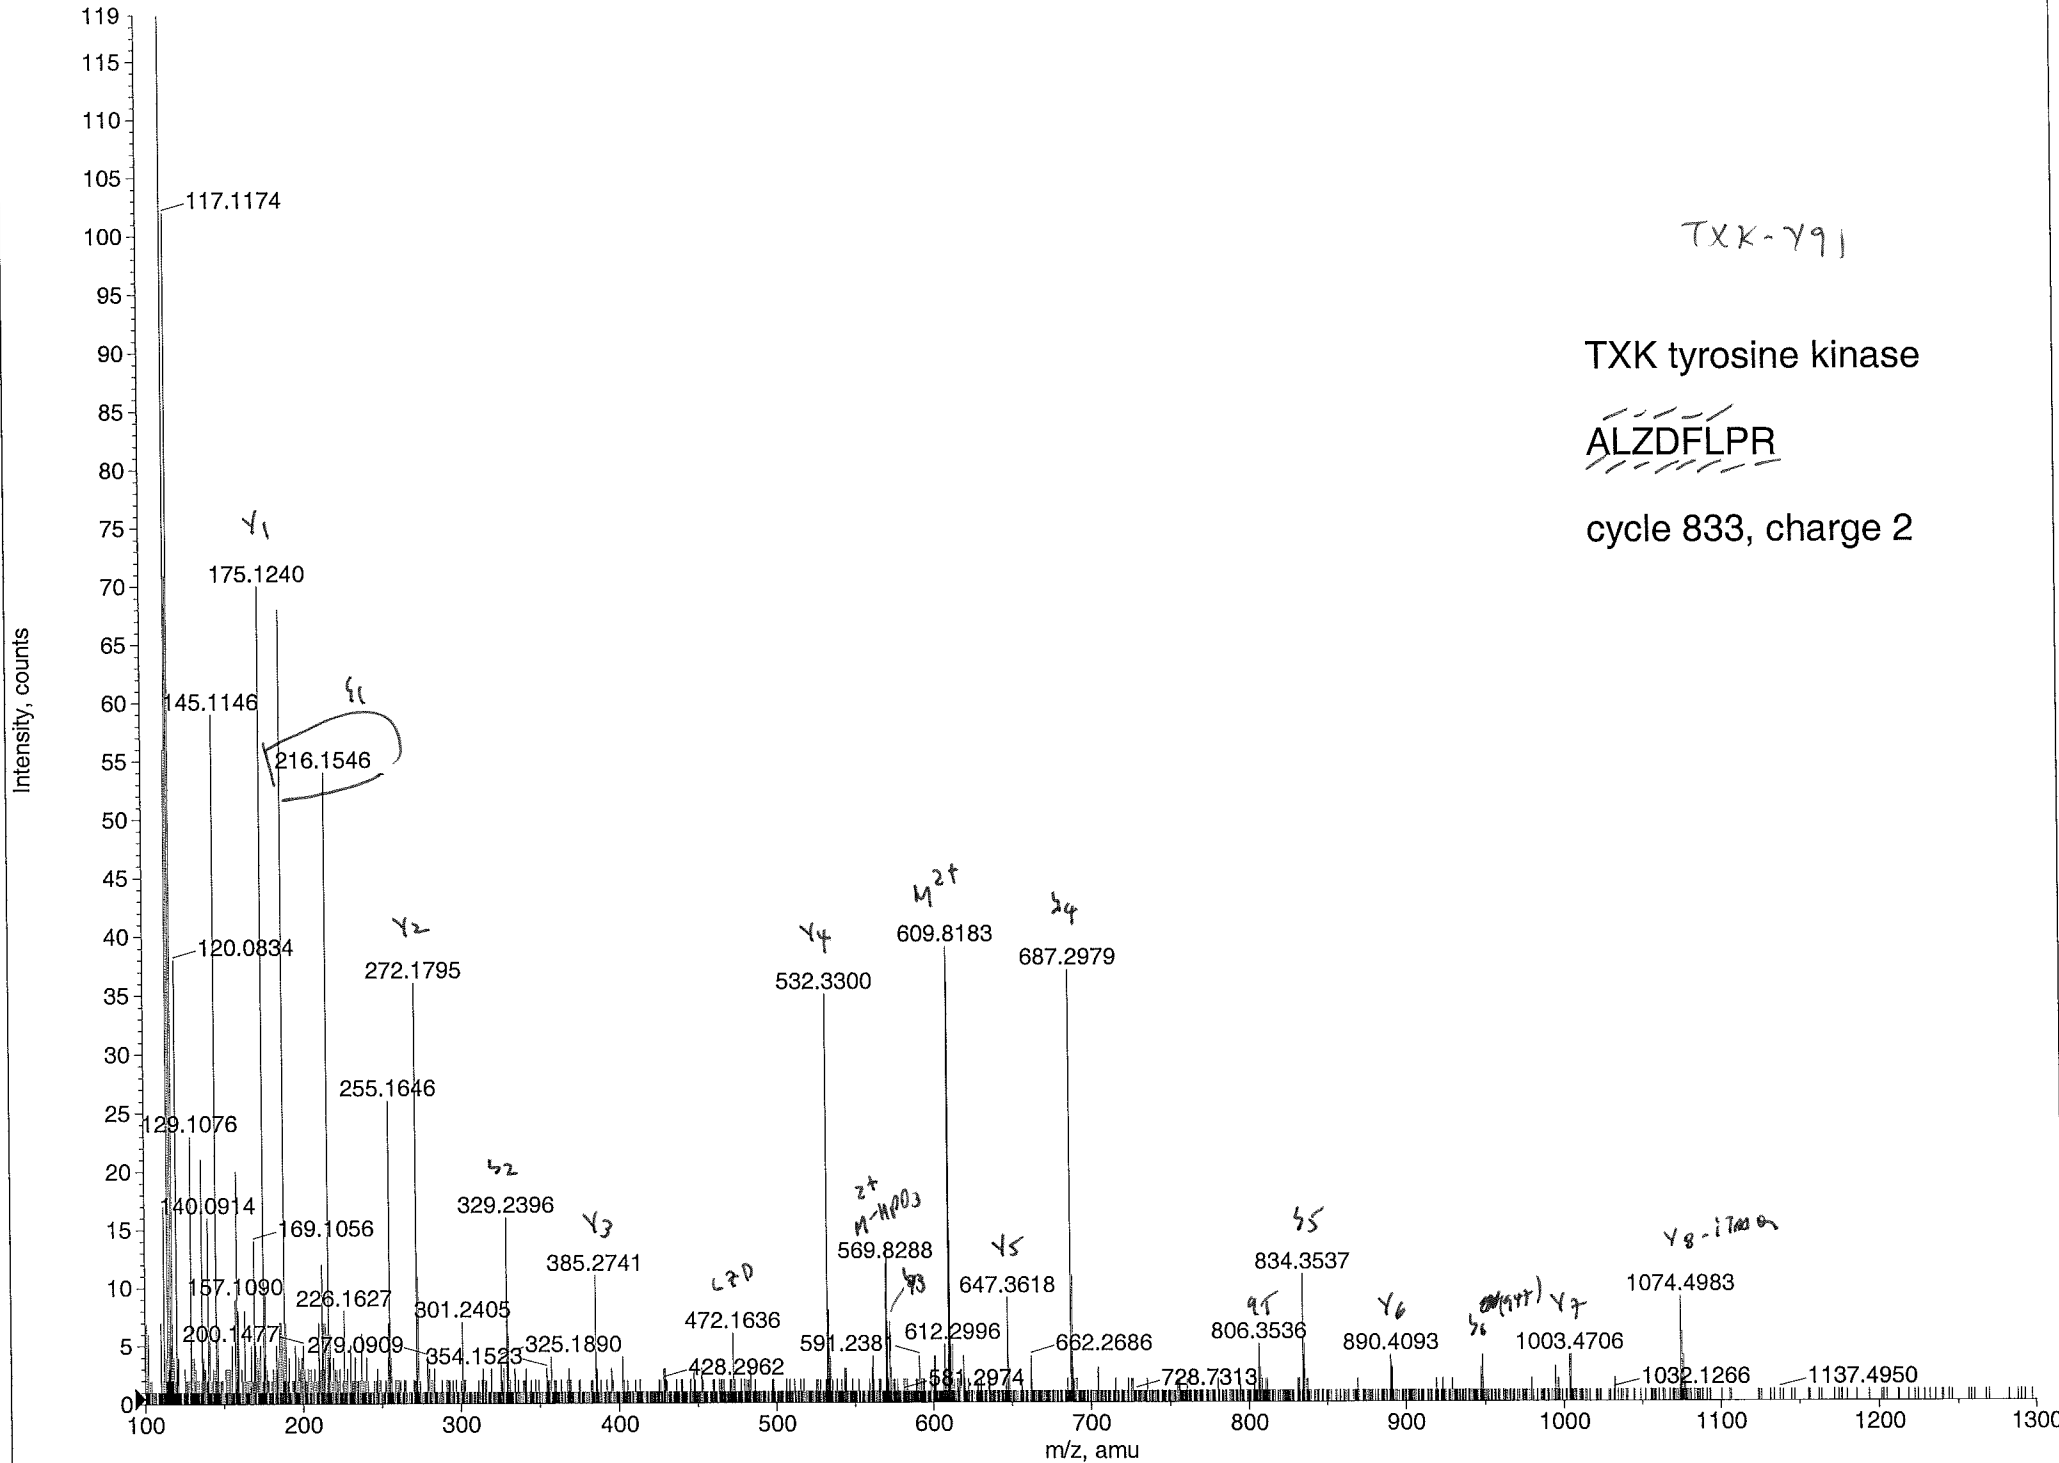

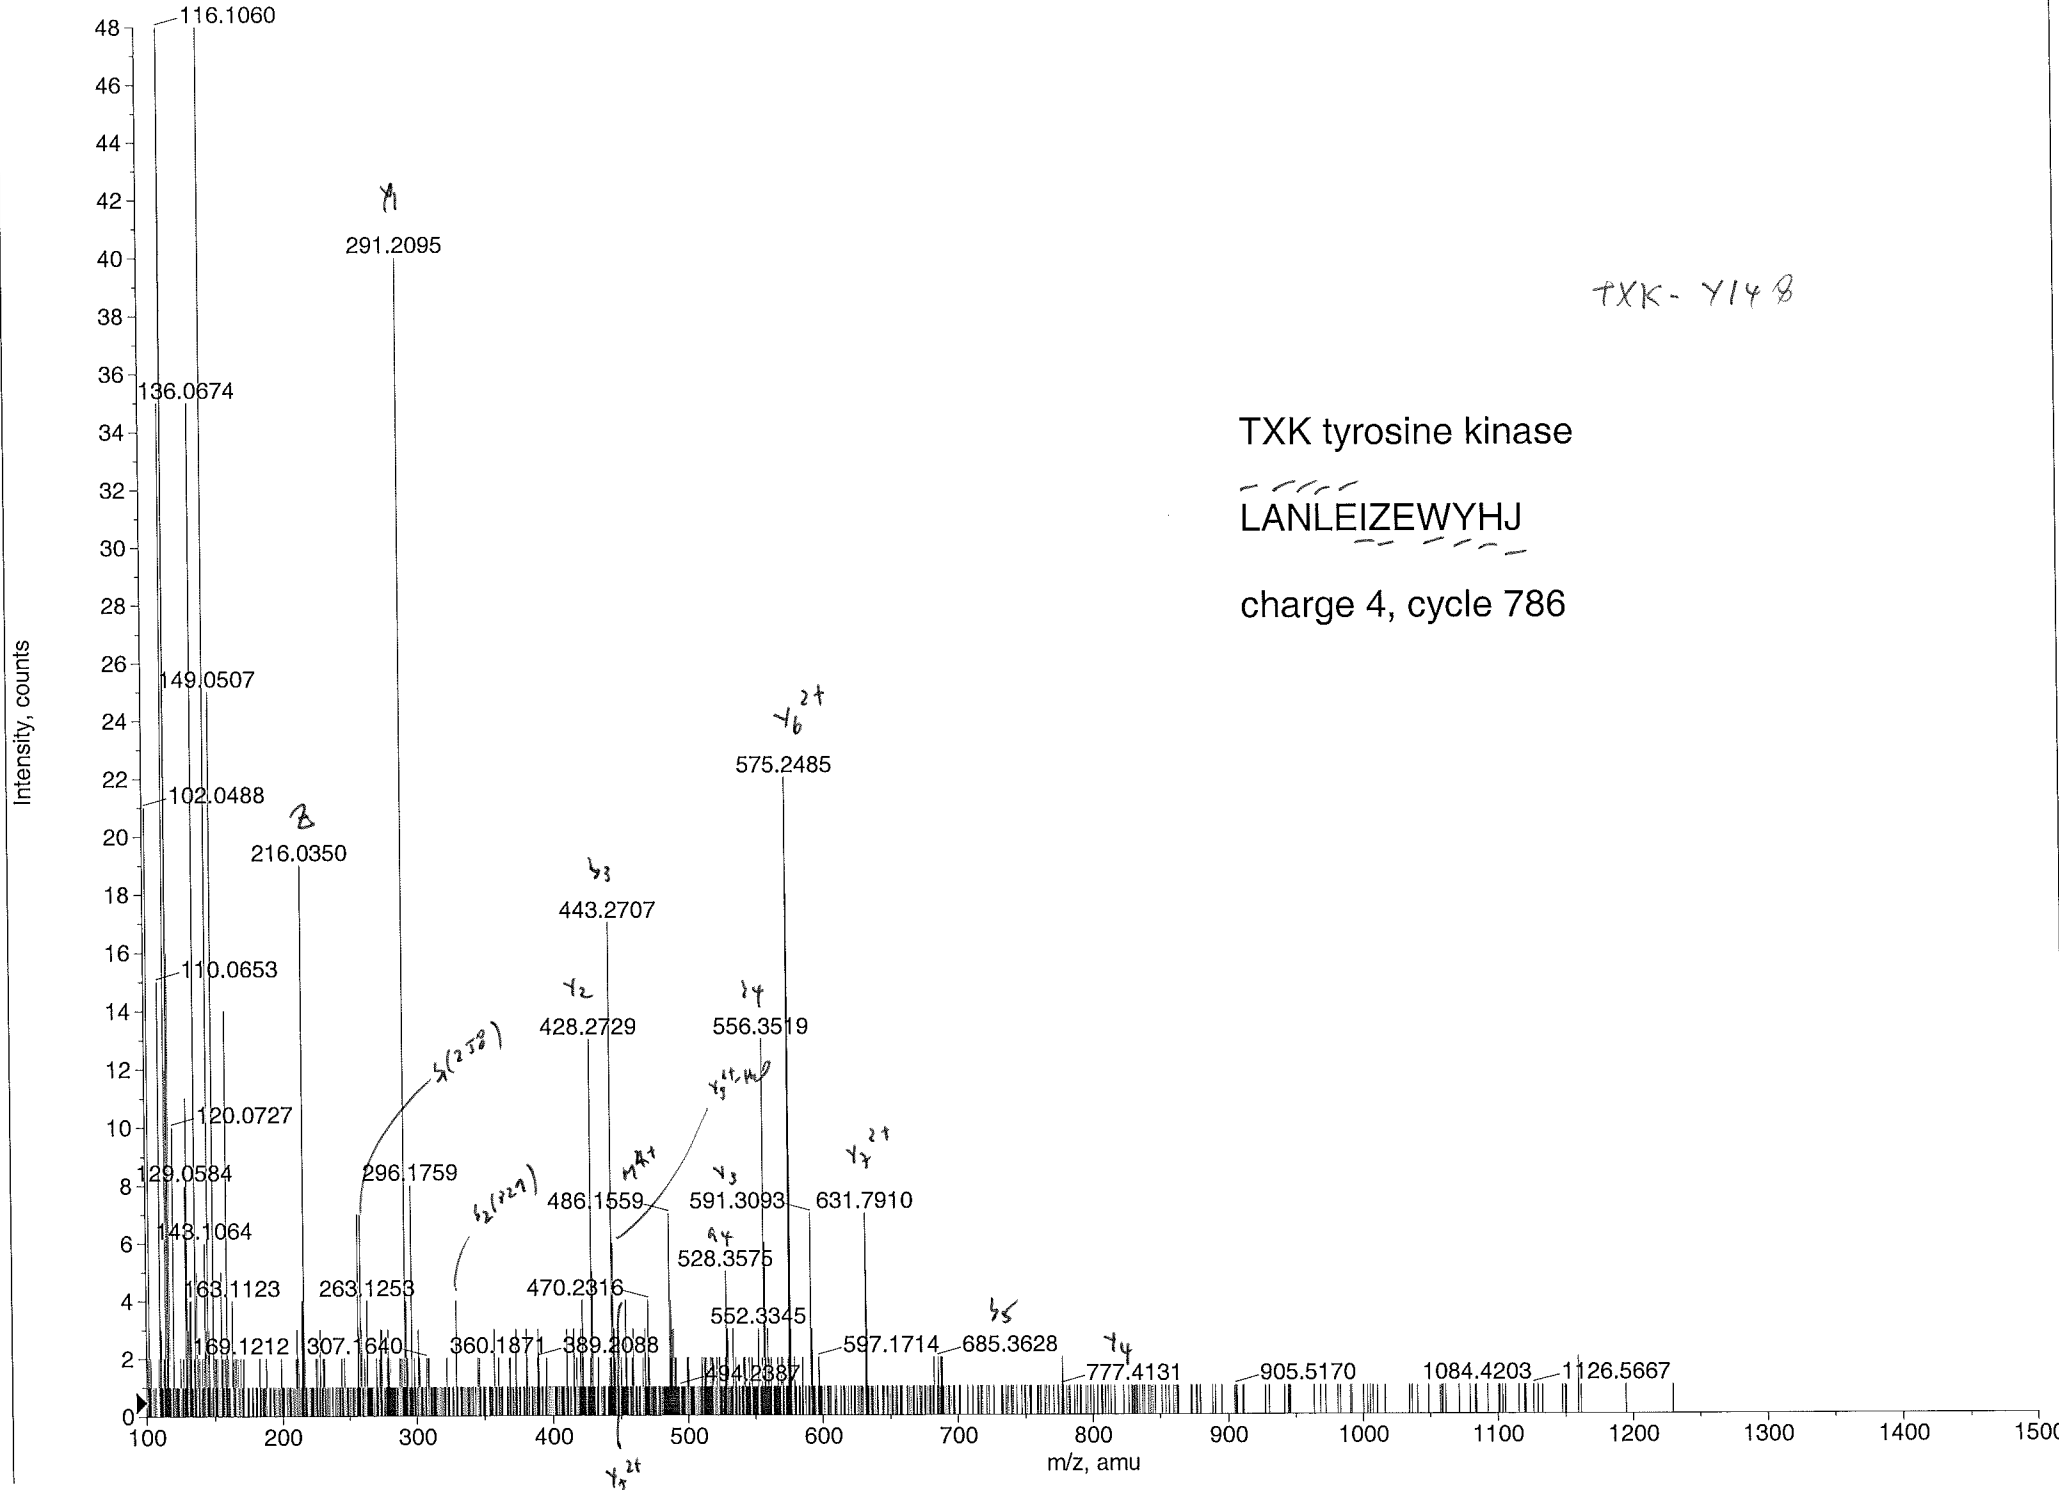

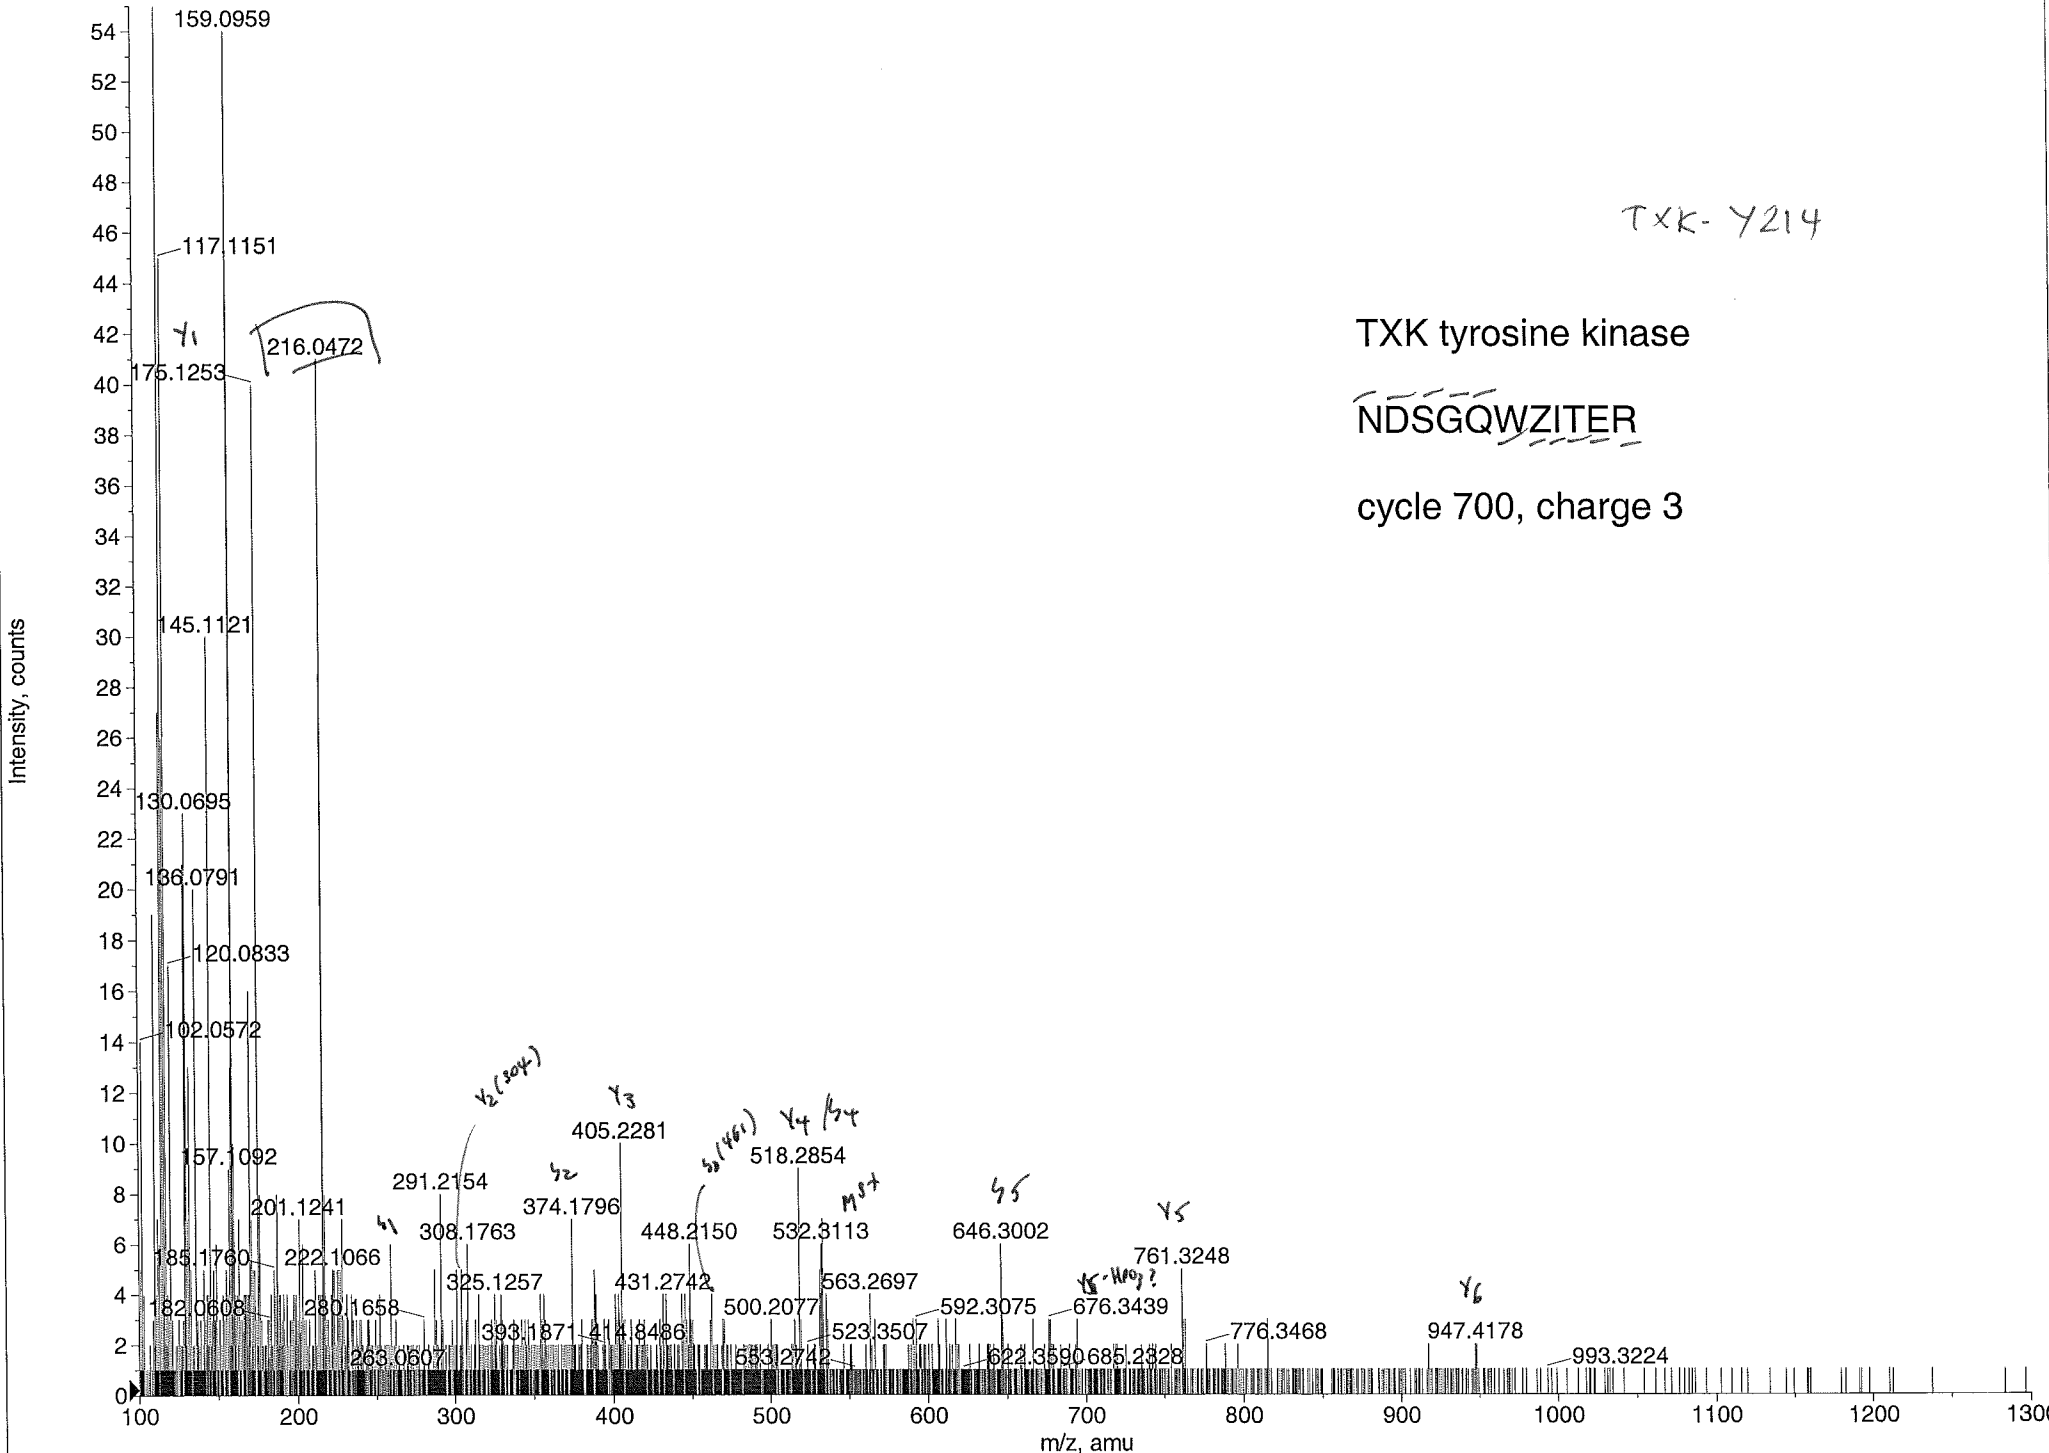



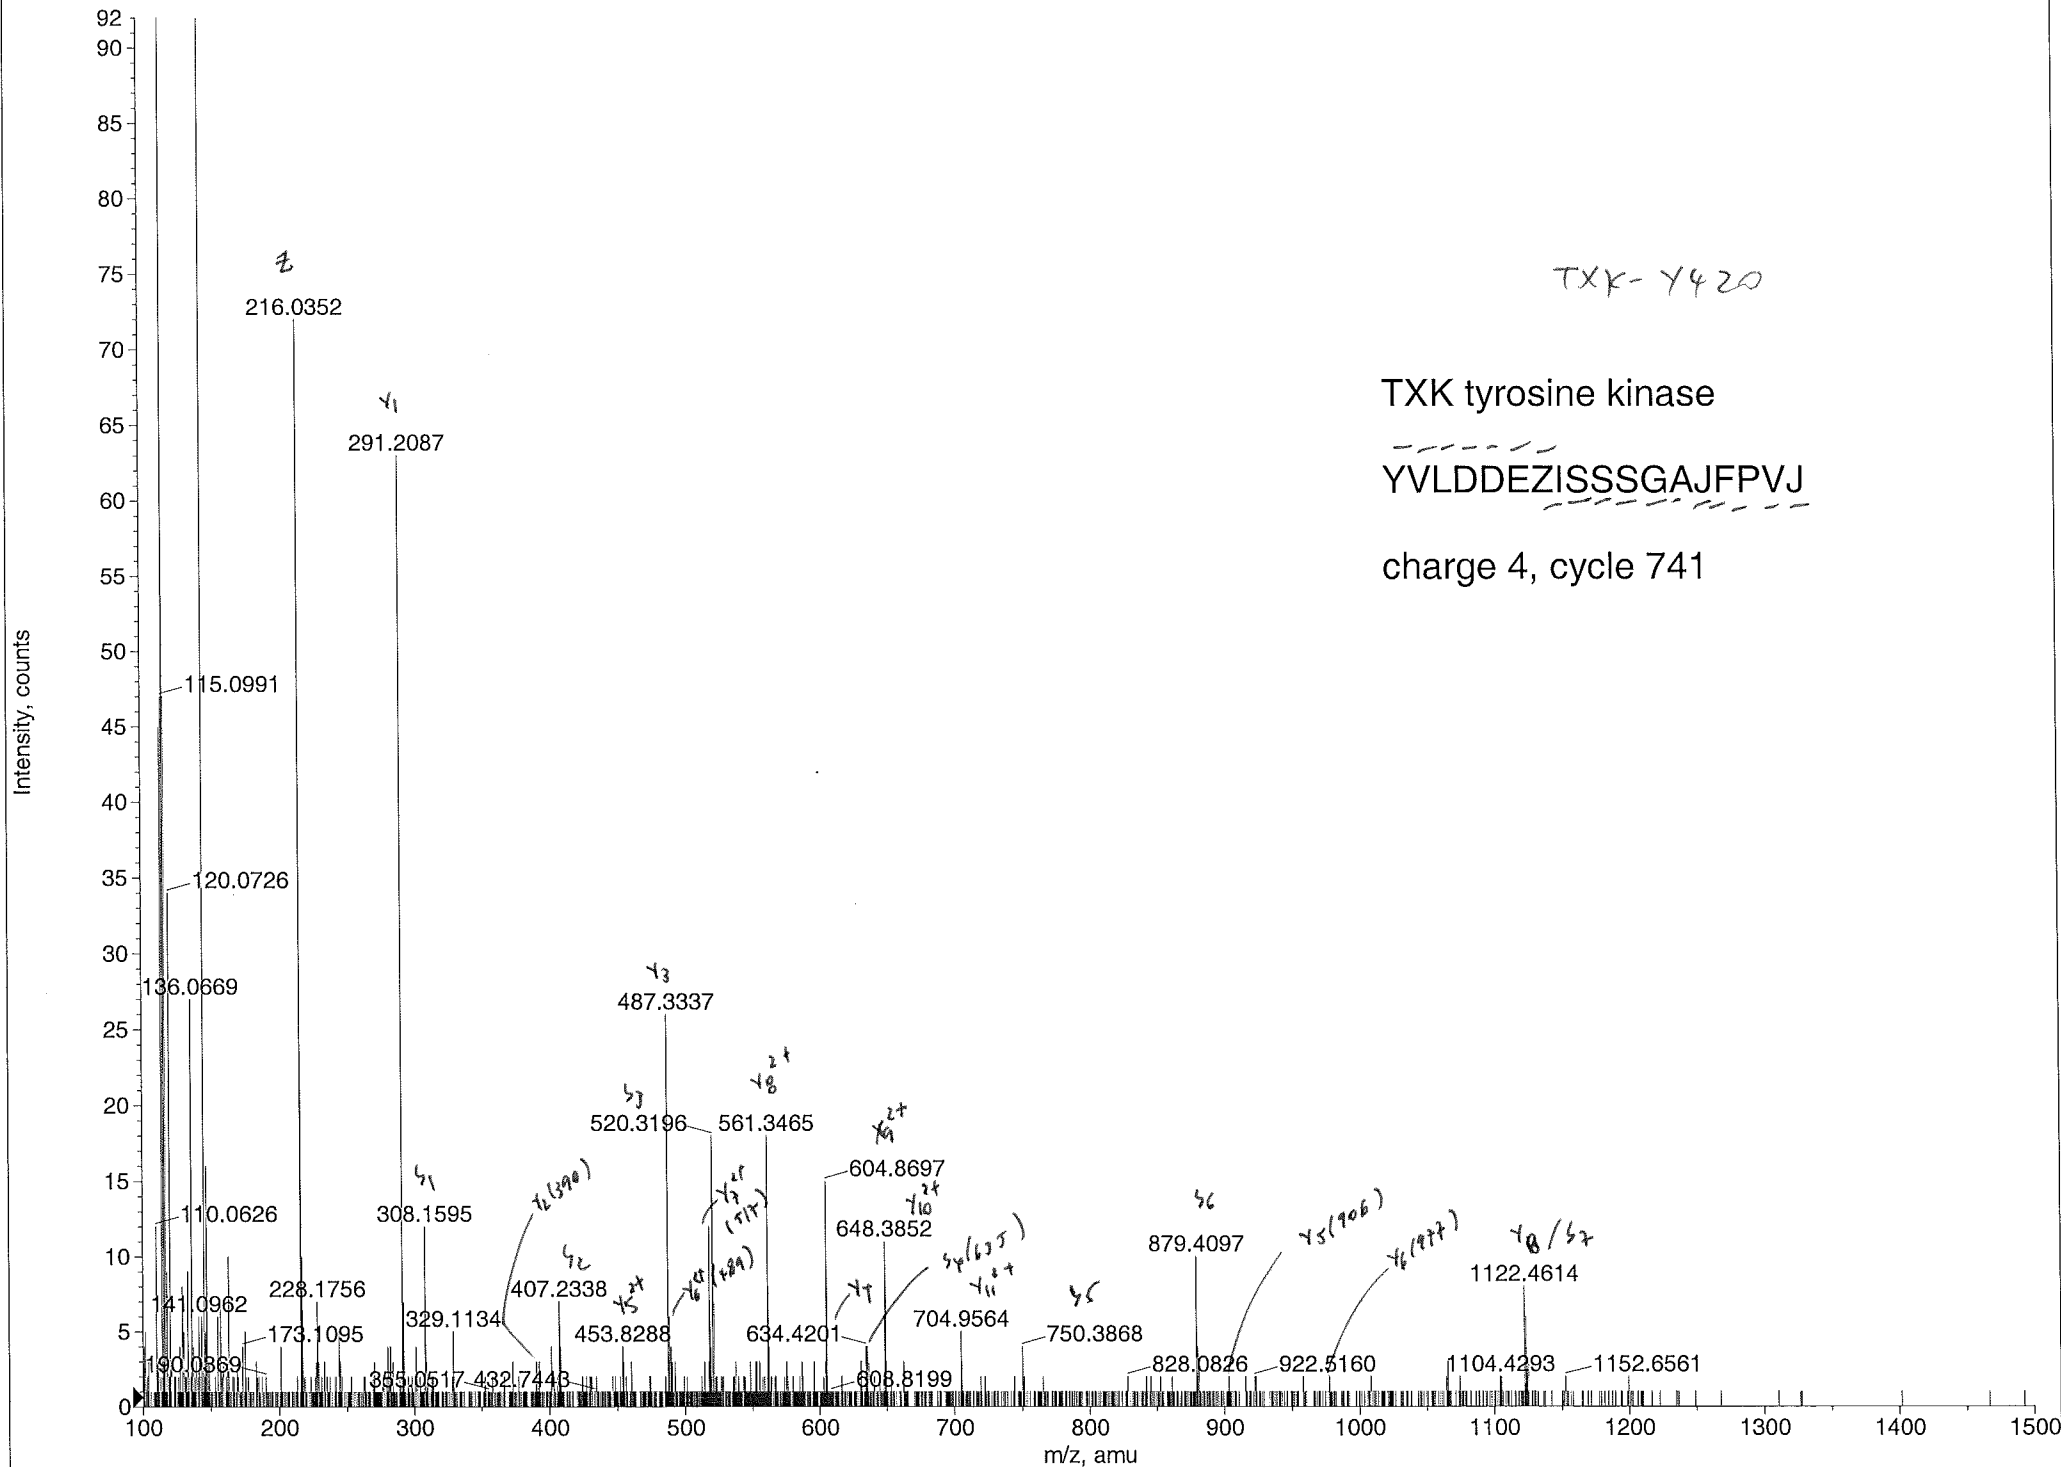

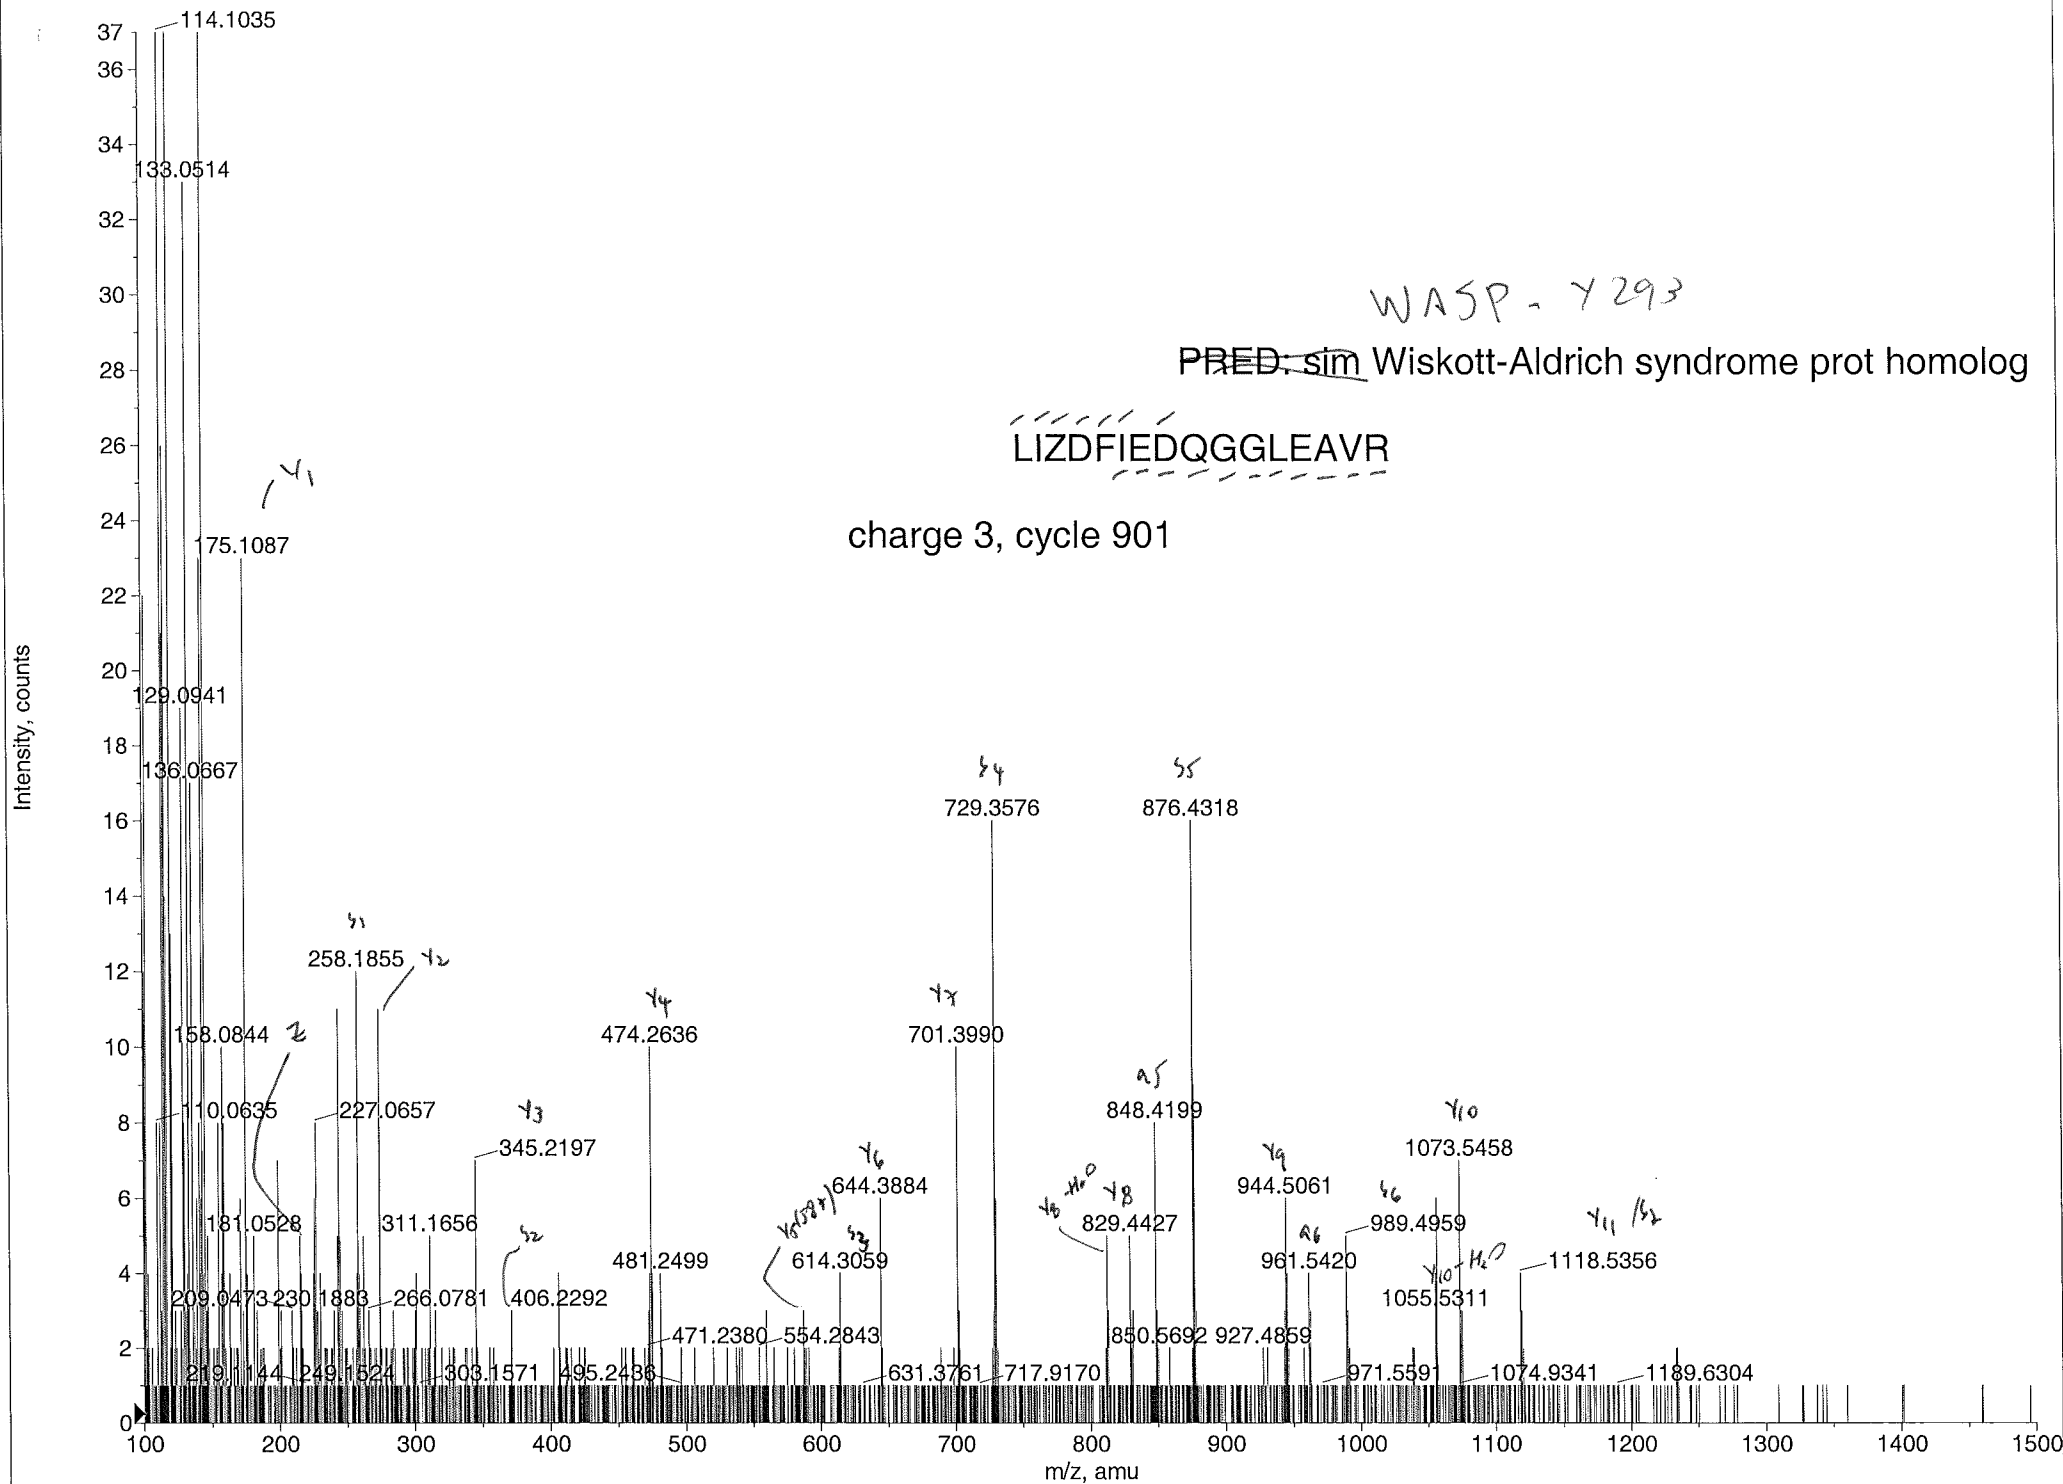

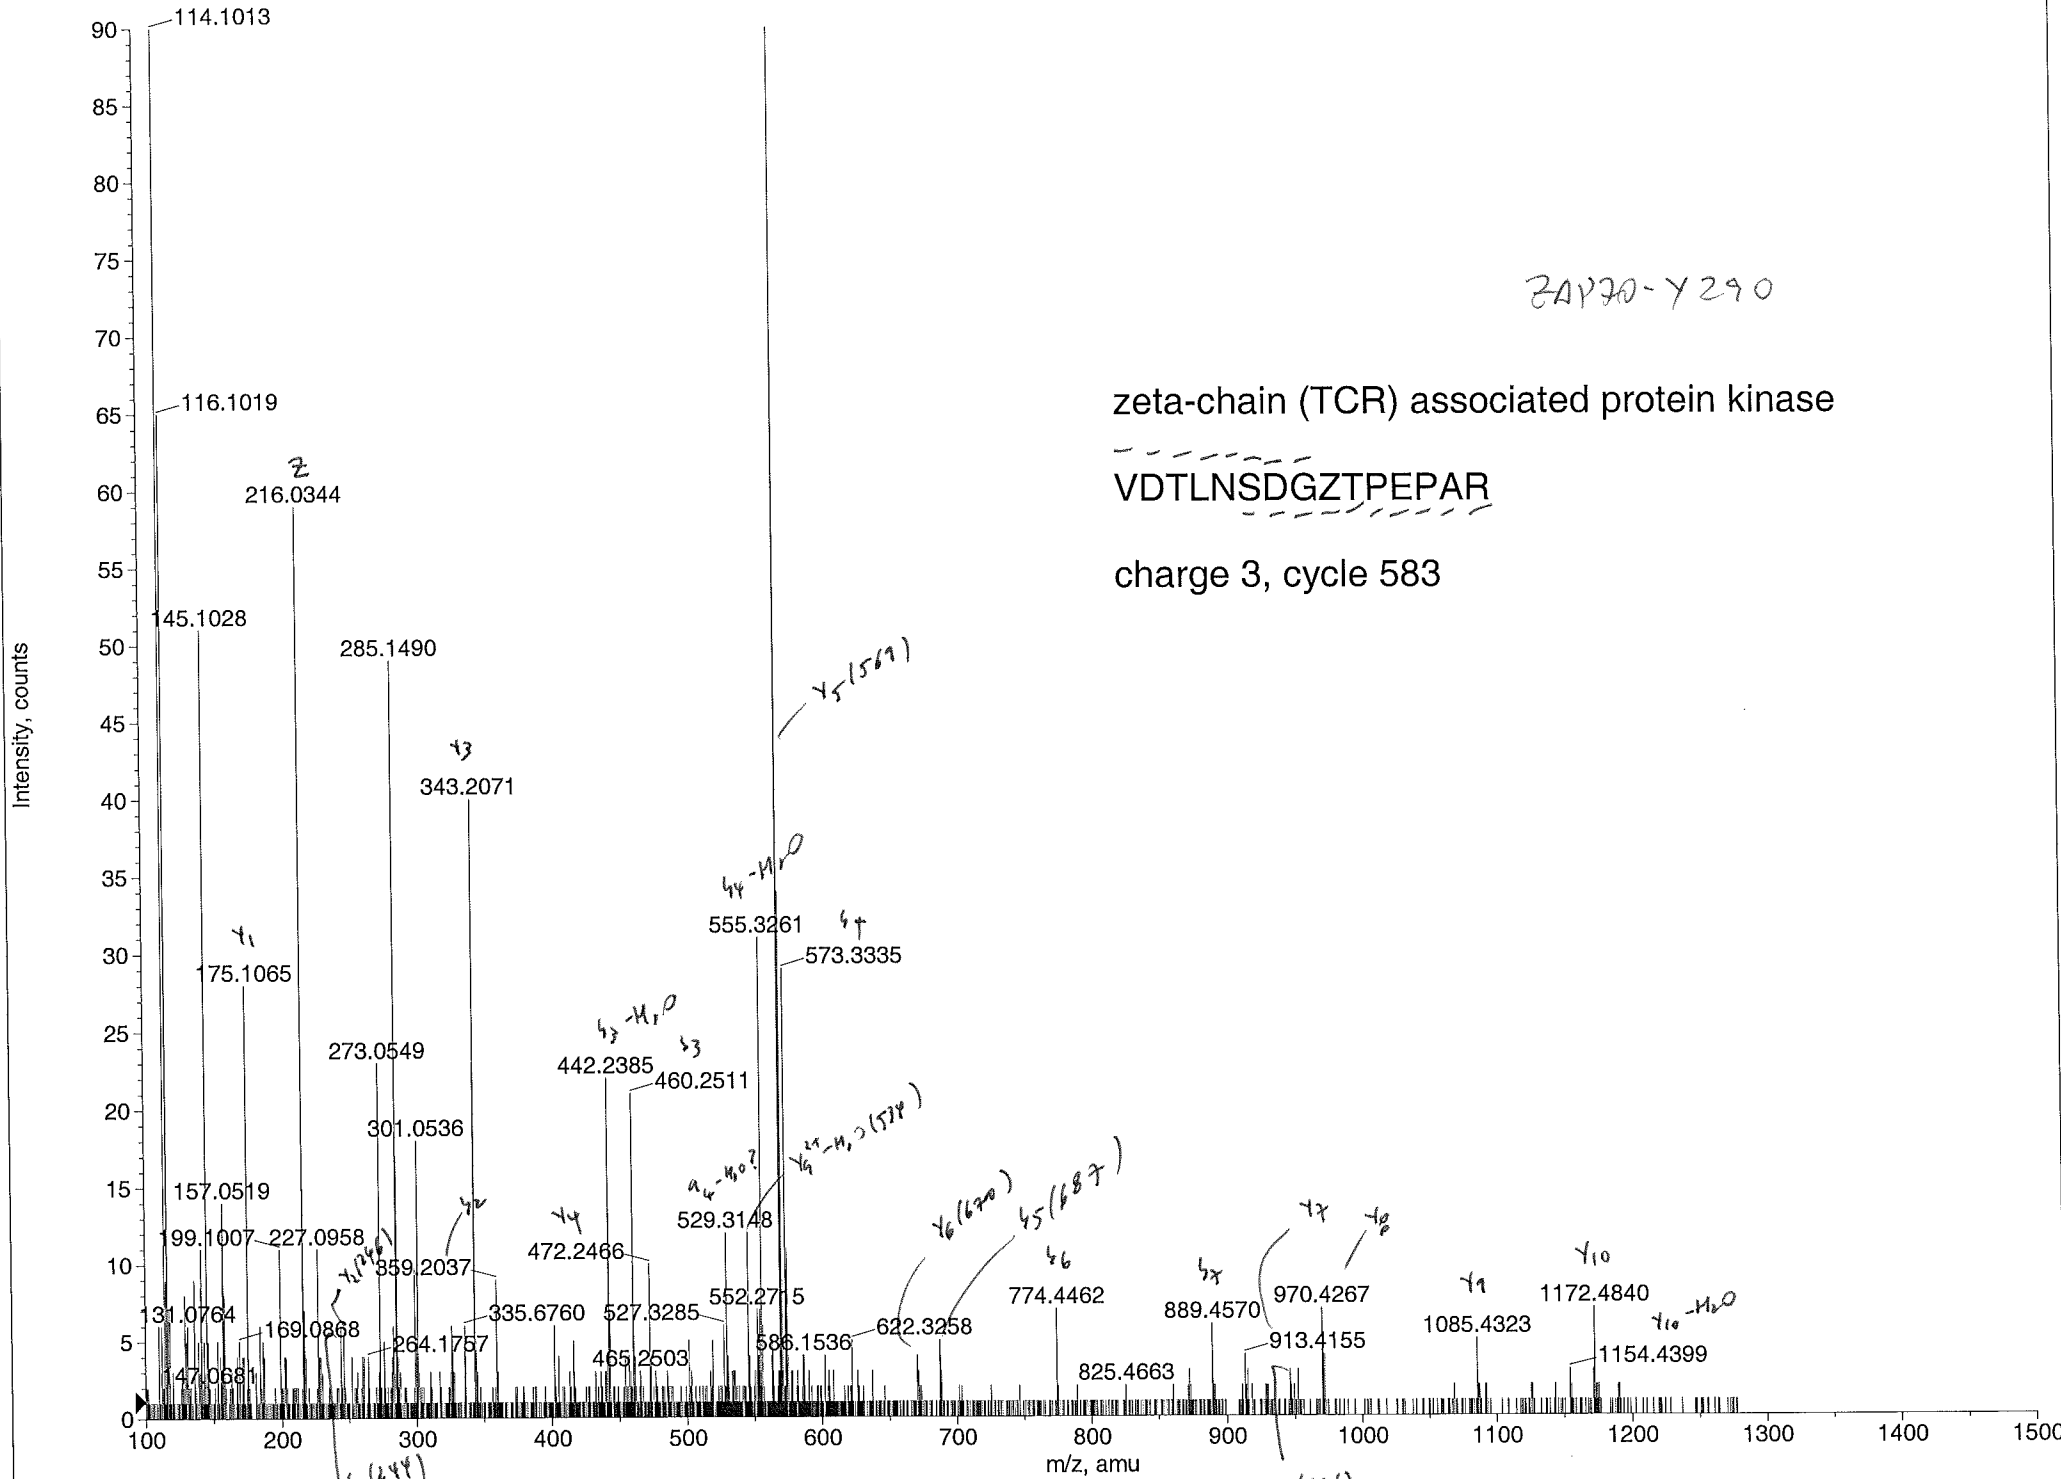

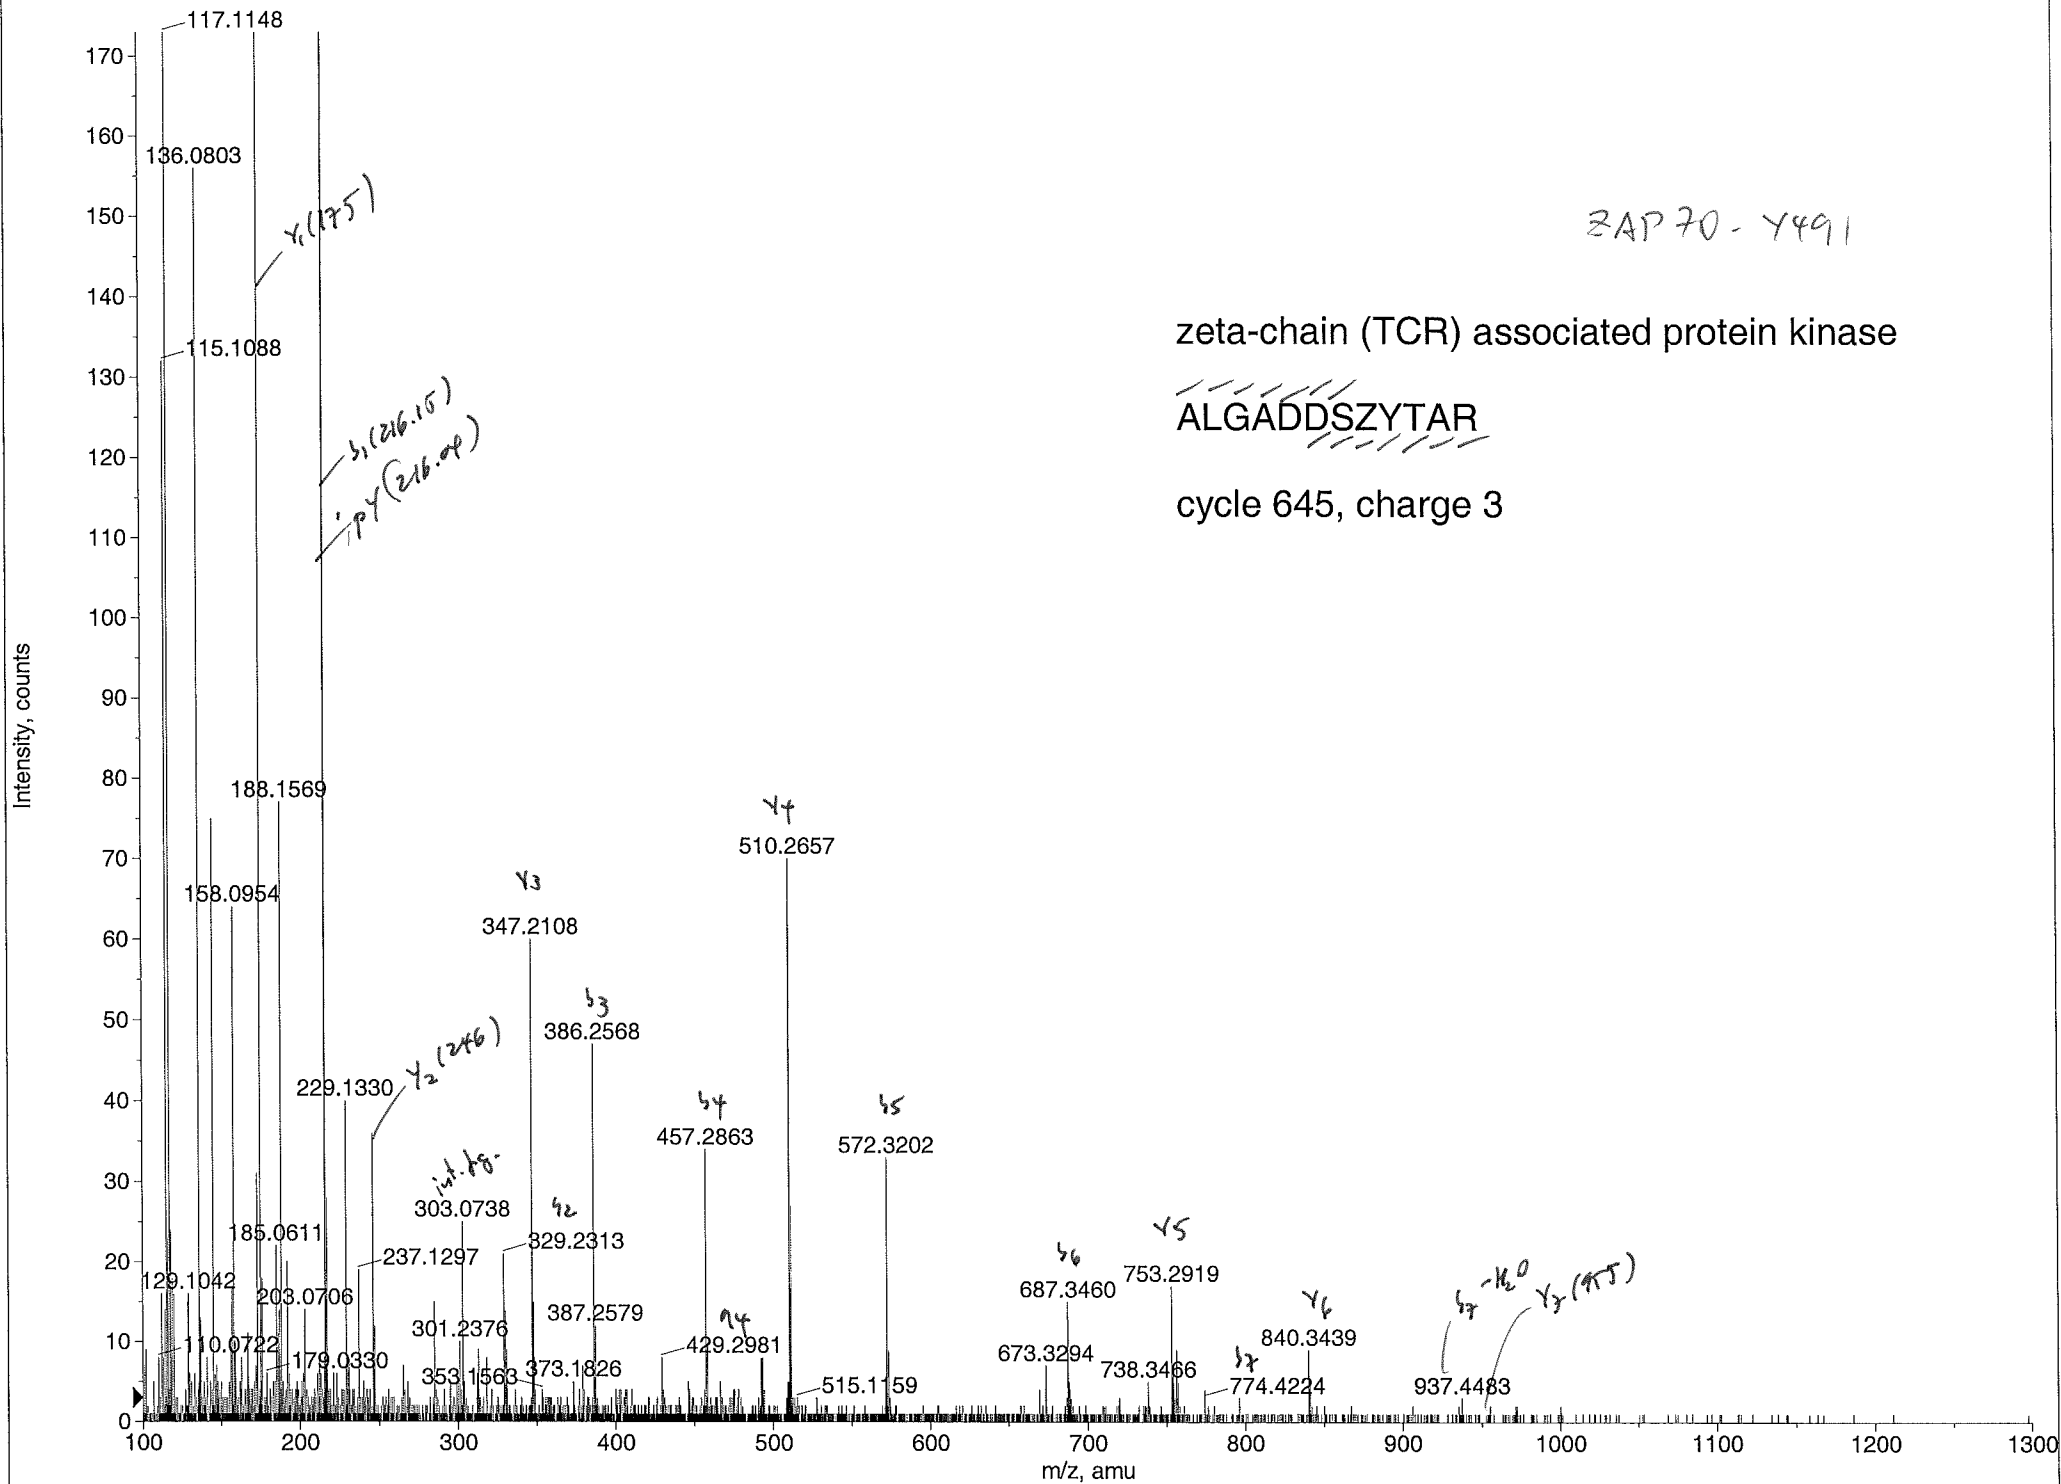

Supplement: NIHMS207342-supplement-2_si_002.pdf [file NIHMS207342-supplement-2_si_002.pdf]
